# Supplementary material for: Cost measurement in value-based healthcare: a systematic review
Source: PubMed Central journal article supplement — BMJ Open. 2022 Dec 7;12(12):e066568. doi: 10.1136/bmjopen-2022-066568 (PMC9730377; doi:10.1136/bmjopen-2022-066568), 2022-12-07
Supplement: bmjopen-2022-066568.draft_revisions.pdf [file bmjopen-2022-066568.draft_revisions.pdf]

# BMJ Open

BMJ Open is committed to open peer review. As part of this commitment we make the peer review history of every article we publish publicly available.

When an article is published we post the peer reviewers' comments and the authors' responses online. We also post the versions of the paper that were used during peer review. These are the versions that the peer review comments apply to.

The versions of the paper that follow are the versions that were submitted during the peer review process. They are not the versions of record or the final published versions. They should not be cited or distributed as the published version of this manuscript.

BMJ Open is an open access journal and the full, final, typeset and author-corrected version of record of the manuscript is available on our site with no access controls, subscription charges or pay-per-view fees (<http://bmjopen.bmj.com>).

If you have any questions on BMJ Open's open peer review process please email [info.bmjopen@bmj.com](mailto:info.bmjopen@bmj.com)

# BMJ Open

## Cost measurement in value-based healthcare – science or fiction? A systematic review.

|                               |                                                                                                                                                                                                                                                                                                                                                                                                                                           |
|-------------------------------|-------------------------------------------------------------------------------------------------------------------------------------------------------------------------------------------------------------------------------------------------------------------------------------------------------------------------------------------------------------------------------------------------------------------------------------------|
| Journal:                      | <i>BMJ Open</i>                                                                                                                                                                                                                                                                                                                                                                                                                           |
| Manuscript ID                 | bmjopen-2022-066568                                                                                                                                                                                                                                                                                                                                                                                                                       |
| Article Type:                 | Original research                                                                                                                                                                                                                                                                                                                                                                                                                         |
| Date Submitted by the Author: | 12-Jul-2022                                                                                                                                                                                                                                                                                                                                                                                                                               |
| Complete List of Authors:     | Leusder, Maura; Erasmus University Rotterdam, Erasmus School of Health Policy and Management<br>Porte, Petra; Erasmus University Rotterdam, Erasmus School of Health Policy and Management<br>Ahaus, Kees; Erasmus University Rotterdam Institute of Health Policy and Management, Department Health Services Management & Organisation<br>van Elten, Hilco; Erasmus Universiteit Rotterdam, Erasmus School of Health Policy & Management |
| Keywords:                     | Organisation of health services < HEALTH SERVICES ADMINISTRATION & MANAGEMENT, Health policy < HEALTH SERVICES ADMINISTRATION & MANAGEMENT, Health economics < HEALTH SERVICES ADMINISTRATION & MANAGEMENT, HEALTH SERVICES ADMINISTRATION & MANAGEMENT                                                                                                                                                                                   |
|                               |                                                                                                                                                                                                                                                                                                                                                                                                                                           |

SCHOLARONE™  
Manuscripts

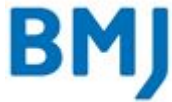

I, the Submitting Author has the right to grant and does grant on behalf of all authors of the Work (as defined in the below author licence), an exclusive licence and/or a non-exclusive licence for contributions from authors who are: i) UK Crown employees; ii) where BMJ has agreed a CC-BY licence shall apply, and/or iii) in accordance with the terms applicable for US Federal Government officers or employees acting as part of their official duties; on a worldwide, perpetual, irrevocable, royalty-free basis to BMJ Publishing Group Ltd ("BMJ") its licensees and where the relevant Journal is co-owned by BMJ to the co-owners of the Journal, to publish the Work in this journal and any other BMJ products and to exploit all rights, as set out in our [licence](#).

The Submitting Author accepts and understands that any supply made under these terms is made by BMJ to the Submitting Author unless you are acting as an employee on behalf of your employer or a postgraduate student of an affiliated institution which is paying any applicable article publishing charge ("APC") for Open Access articles. Where the Submitting Author wishes to make the Work available on an Open Access basis (and intends to pay the relevant APC), the terms of reuse of such Open Access shall be governed by a Creative Commons licence – details of these licences and which [Creative Commons](#) licence will apply to this Work are set out in our licence referred to above.

Other than as permitted in any relevant BMJ Author's Self Archiving Policies, I confirm this Work has not been accepted for publication elsewhere, is not being considered for publication elsewhere and does not duplicate material already published. I confirm all authors consent to publication of this Work and authorise the granting of this licence.

1  
2  
3 **Title: Cost measurement in value-based health care – science or fiction? A systematic**  
4 **review.**  
5

6 **Running head: Cost measurement in value-based health care**  
7

8  
9 **Authors:** Maura Leusder, Petra Porte, Kees Ahaus & Hilco van Elten  
10

11 Maura Leusder, MSc.

12 Department Health Services Management & Organisation, Erasmus University Rotterdam  
13 The Netherlands  
14  
15

16 Petra J. Porte, PhD.

17 Department Health Services Management & Organisation, Erasmus University Rotterdam  
18 The Netherlands  
19  
20

21 C.T.B. (Kees) Ahaus, Prof. Dr. Ir.

22 Department Health Services Management & Organisation, Erasmus University Rotterdam  
23 The Netherlands  
24  
25

26 Hilco J. van Elten, PhD.

27 Department Health Services Management & Organisation, Erasmus University Rotterdam  
28 The Netherlands  
29

30 **Corresponding author;** Maura Leusder, MSc.  
31

32 leusder@eshpm.eur.nl.

33 +31 06 38002149

34 J6-41, Bayle Building (J) Burgemeester Oudlaan 50, 3062 PA Rotterdam

35 Postbus 1738, 3000 DR Rotterdam  
36  
37  
38  
39

40 Word count: 4090

41 Tables and figures: 5  
42  
43  
44  
45  
46  
47  
48

49 **Keywords:** Costs, value-based healthcare, cost accounting, process improvements, time-driven  
50 activity-based costing, activity-based costing, decision-making  
51  
52  
53  
54  
55  
56  
57  
58  
59  
60

## ABSTRACT

**Objective** Value-based health care (VBHC) considers accurate cost information to be relevant to the pursuit of value, but little is known about how costs of care should be measured. The aim of this review is to identify how costs are measured in VBHC, and which cost measurement methods can facilitate VBHC or value-based decision making.

**Design** We systematically screen PubMed/MEDLINE, Embase, EBSCOhost and Web of Science with two reviewers following PRISMA guidelines, including studies up to 1/1/2022.

**Eligibility criteria** We require studies to measure costs of an intervention, treatment, or care path and to label the study as 'value-based'. An inductive qualitative approach was used to categorize studies following management accounting to identify if or how cost information facilitated VBHC by aiding decision making.

**Results** We find 1,930 studies, 215 of which measured costs in a VBHC setting. Half of all studies measure hospital costs (110, 51.2%) while the remainder use reimbursements. Sophisticated costing methods that allocate both direct and indirect costs to care paths can provide valuable managerial information by facilitating care path adjustments (40), benchmarking (39), the identification of cost drivers (47), and measurement of total costs or cost savings (26) We find three best practices important to success in costing: process mapping (34), expert input (16), and observations (24).

**Conclusions** Cost information can facilitate VBHC. While time-driven activity-based costing (TDABC) is prized as the best method, its ability to inform decision-making depends on its implementation. Costing short or partial care paths and surgical episodes produces accurate cost information but limited decision-making information. Practitioners are advised to prioritize costing full cycles of care and to consider both direct and indirect costs through TDABC.

### Strengths and limitations

- Using two independent reviewers this systematic review analyzes and all value-based healthcare studies that have measured costs to date to provide a comprehensive comparison of cost measurement methods.
- By revealing four mechanisms through which cost measurement facilitates value-based healthcare, this research operationalizes the potential benefits of cost measurement to practitioners.
- By comparing the methods used by studies to collect cost information, this study finds three best practices for practitioners and researchers.
- Due to limiting the search to studies labeled as ‘value-based’ in the title or abstract, this review omits studies that measure costs in healthcare but do not explicitly pursue value-based healthcare.
- Included studies may have achieved value-based healthcare without reporting this in the paper, and therefore may be underrepresented in research question 2.

## INTRODUCTION

To make value-based decisions in health care, hospital practitioners and health care providers require patient-level information on the costs and outcomes achieved in hospitals and health care organizations [1]. This enables care providers to steer towards better patient-reported outcome measures, patient-reported experience measures, and clinical outcomes at equal or lower cost [2]. With detailed cost and outcome information, care paths can be optimized continuously [3]. Value-based health care (VBHC) is therefore also considered one solution to the financial pressures our global health care system places on managers and administrators [1,4,5] based on its promise to streamline care by focusing on desirable outcomes. This is of relevance to hospital administrators and managers facing complex decisions under considerable financial pressures. Additionally, hospitals benefit from cost information by gaining insight into the sources of costs to guide cost-containment strategies. Cost information may therefore facilitate process and quality improvement initiatives pursued by management [6–10]. Furthermore, insight into patient-level or treatment-level costs enables hospitals to negotiate appropriate prices with insurance firms, especially as we move towards new payment models and away from fee-for-service payments [11,12]. Lastly, such treatment-level cost information is suggested to enable competition among hospitals based on outcomes and prices due to market forces [13].

Considerable research has addressed the outcome side of Porter's value equation and The Triple Aim [14]. Many studies measured patient-level outcomes from both the patient perspective (e.g., patient-reported outcome measures, patient-reported experience measures) and clinical outcome perspective [15,16]. Less is known about the cost side of this equation. Often, the term 'cost' is conflated with the price paid by insurance firms or patients to the hospital [17,18]. However, prices do not reflect the full costs incurred by hospitals [6,19–21]. Prices paid by

1  
2  
3 insurance firms are negotiated sums that include profit margins by both the insurer and the hospital  
4 [22]. They are also impacted by political factors, such as hospital-payor mix [23], which refers to  
5  
6 [22]. They are also impacted by political factors, such as hospital-payor mix [23], which refers to  
7  
8 the range of private vs. public insurance firms that make up the hospital's income stream. Lastly,  
9  
10 fee-for-service payments fail to account for patient-level differences in care required.  
11  
12 Reimbursements are therefore a poor indicator of costs.  
13  
14

15  
16 Some authors argue for the implementation of time-driven activity-based costing  
17 (TDABC) as the 'golden standard' of cost measurement in healthcare organizations [3,5,15].  
18  
19 TDABC is a method of matching direct and indirect costs to activities in a fine-grained way, based  
20  
21 on the amount of time an activity takes. A care path is made up of many activities, each generating  
22  
23 costs. The costs of a care path can be calculated by first identifying all relevant costs to each  
24  
25 activity, and then adding up those costs across the activities [22]. One step of this method called  
26  
27 'process mapping' presents care paths visually in a flowchart.  
28  
29  
30  
31

32  
33 Though initial research is growing and promising, we have relatively little empirical  
34  
35 evidence supporting TDABC as the best costing method to enable VBHC, as studies rarely  
36  
37 compare methods of cost measurement or simply use whichever system the investigated hospital  
38  
39 or care provider uses. Costing methods vastly differ by how they allocate indirect costs to products  
40  
41 or services [24]; moreover, indirect costs cannot causally be attributed to patients and need to be  
42  
43 properly allocated. One example of indirect costs are salaries of administrative personnel, e.g.,  
44  
45 front office staff who welcomes patients, coordinates schedules, or manages equipment such as a  
46  
47 Da Vinci surgical robot system by Intuitive Surgical (Sunnyvale, CA, USA). While some methods  
48  
49 ignore this (e.g., direct costing), other methods average indirect costs across days or months, or  
50  
51 systematically allocate them to patients. These methods exist on a continuum from imprecise to  
52  
53 fine-grained, with TDABC leaning towards fine-grained. This insight is particularly relevant to  
54  
55  
56  
57  
58  
59  
60



1  
2  
3 health care, where indirect costs are high. The most fine-grained method is activity-based costing  
4 (ABC), which allocates indirect costs based on actual units of resources used per activity. In  
5  
6  
7  
8 comparison, TDABC allocates indirect costs based on a per-minute cost, making it considerably  
9  
10  
11  
12 easier to implement than ABC. Costing methods that do not consider the indirect costs of a care  
13  
14  
15 path underestimate the true costs of the care delivered.

16  
17  
18  
19  
20  
21  
22  
23  
24  
25  
26  
27  
28  
29  
30  
31  
32  
33  
34  
35  
36  
37  
38  
39  
40  
41  
42  
43  
44  
45  
46  
47  
48  
49  
50  
51  
52  
53  
54  
55  
56  
57  
58  
59  
60  
Prior systematic reviews found that TDABC was able to facilitate VBHC, citing mostly  
cost savings as a result and without comparing it to alternative methods [3,4,15]. Therefore, we do  
not know how this compares to other cost measurement methods currently being used. While  
TDABC may be able to facilitate VBHC [5,15], it is unclear how these benefits compare to other  
costing methods currently used in practice. Therefore, the cost side of the value equation remains  
unclear. To address this challenge, we pose two questions:

RQ1: Which costing methods are currently being used by practitioners to facilitate VBHC?

RQ2: What are the consequences of applying one specific costing method in VBHC?

Such consequences may include whether the method enables cost reduction at equal or  
better outcomes or provides sufficient information to further improve a care path.

This comprehensive review draws on accounting literature [24] to categorize costing  
methods in empirical VBHC literature published over the last two decades (January 1, 2003 to  
January 1, 2022). Compiling the evidence in this way reveals four ways in which cost information  
facilitates VBHC and three best practices.

## MATERIALS AND METHODS

### Literature search strategy

To identify eligible studies, we systematically searched four major databases: Embase, Medline,  
Web of Science, and CINAHL EBSCOhost. Our search string (**online supplementary appendix**)

1  
2  
3 was developed by assessing previously identified relevant papers; it is designed to catch all studies  
4 that address VBHC and measure costs of an intervention, care path, or treatment by including the  
5  
6 following specific terms:  
7

8  
9  
10 \*cost\*, microcost\*, macrocost\* AND [meaning in combination with] value-based, value  
11 based, OR valuebased  
12

13 Prior search string testing showed that restricting the search to the phrase “value-based healthcare”  
14 excluded too many relevant studies because authors use “value-based perspective,” “value-based  
15 equation,” or similar variations when referring to VBHC. Conversely, the term “value” alone was  
16 too broad and yielded more than 40,000 mostly non-specific results. By using wildcard terms  
17 indicated by stars we include all variations on the term ‘cost’.  
18  
19  
20  
21  
22  
23  
24  
25  
26

### 27 **Study eligibility criteria, record selection, and data collection**

28  
29 We limited inclusions to studies that were peer-reviewed empirical research and measured or  
30 estimated costs in a VBHC context. All inclusion criteria and variables extracted are detailed in  
31 the **online supplementary appendix**. The following variables were collected, inspired by Porter  
32 [2] and the cost measurement methods defined in accounting literature:  
33  
34  
35  
36  
37

- 38 • Cost types included (direct vs. indirect).
- 39 • Cost perspective (provider, payer, patient).
- 40 • Portion of the care path costed (full, partial).
- 41 • Cost measurement method used (as labelled by the authors of the study).
- 42 • Cost measurement method applied, e.g. direct costing, absorption costing, step-down  
43 allocation, other recognized methods [24].
- 44 • Consequences of the costing information generated.

45  
46  
47  
48  
49  
50  
51  
52 **Patient and public involvement:** This study did not involve patients or the public in designing,  
53 executing, or reporting of the research.  
54  
55  
56  
57

## RESULTS

### Record selection

Our four-person (ML, PP, HvE, KA) research group identified 3,275 relevant papers, of which 1,930 remained after deduplication. We conducted a trial screening of 30 papers to test and specify the screening criteria. The screening process comprised two rounds as shown in **Figure 1**. In Round 1, ML and PP screened the titles and abstracts independently. If there was uncertainty about the eligibility of the paper, it was included for the full-text screen following Bramer [25]. We admitted 674 studies based on titles and abstracts with a Cohen's kappa inter-rater reliability score of 0.78, indicating substantial agreement [26].

In Round 2, both ML and PP screened the full text of all 674 studies independently. 215 out of 674 studies were included for RQ1, with a Cohen's kappa of 0.76 between both ML and PP. HvE was included in the discussion as needed. Lastly, we assessed whether the paper discussed if or how the costing information facilitated VBHC (RQ2), yielding 49 cases in which the costing method facilitated VBHC. This review was not registered.

*Figure 1 here*

**Figure 1.** PRISMA flowchart depicting screening, exclusion, and inclusion process with 2 reviewers.

## Descriptive characteristics

An overview of the included studies is provided in **Table 1**. Our earliest study is from 2005, with a spike in studies for 2017. Just under half (n=98, 45.6%) of studies were published in the last two years. An overwhelming majority is from the US (n= 178, 82.8%). Europe is the second most common continent with 22 (10.6%) studies being European, 9 (4.2%) of which are Dutch.

The three largest medical specialty groups represented are surgical (n=99; 46.0%), oncology (n=37; 17.2%) and paediatrics (n=19; 8.8%). The complete list of 215 inclusions is summarized in the **online supplementary appendix**. Extracted data is available in the **supplementary file**.

| Characteristic          | n   | %     | Characteristic                     | n  | %     |
|-------------------------|-----|-------|------------------------------------|----|-------|
| <b>Year published</b>   |     |       | <b>Topic</b>                       |    |       |
| 2005-2009               | 3   | 1.4%  | Cardiology                         | 5  | 2.3%  |
| 2010-2013               | 6   | 2.8%  | Dermatology                        | 1  | 0.5%  |
| 2014                    | 6   | 2.8%  | Emergency & acute care             | 11 | 5.1%  |
| 2015                    | 7   | 3.3%  | Endocrinology                      | 3  | 1.4%  |
| 2016                    | 9   | 4.2%  | Surgical, <i>of which</i>          | 99 | 46.0% |
| 2017                    | 17  | 7.9%  | Appendicitis, 2                    |    |       |
| 2018                    | 28  | 13.0% | Abdominal, 6                       |    |       |
| 2019                    | 41  | 19.1% | Bariatric, 2                       |    |       |
| 2020                    | 43  | 20.0% | Cardiac/Thoracic, 12               |    |       |
| 2021                    | 51  | 23.7% | Colon/Rectal, 2                    |    |       |
| 2022 as per 1/1/2022    | 4   | 1.9%  | Endocrine, 2                       |    |       |
| <b>Geography</b>        |     |       | Ear/Nose/Throat, 2                 |    |       |
| <b>Americas</b>         |     | 84.3% | Gallbladder, 2                     |    |       |
| Brazil                  | 3   |       | Liver, 2                           |    |       |
| Canada                  | 1   |       | Neurosurgical, 5                   |    |       |
| US <i>of which</i>      | 178 |       | Orthopaedic arthroplasty, 25       |    |       |
| Boston, 8               |     |       | Orthopaedic fracture, 12           |    |       |
| California, 18          |     |       | Orthopaedic rotator cuff repair, 2 |    |       |
| New York, 23            |     |       | Orthopaedic other, 3               |    |       |
| Texas, 12               |     |       | Plastic surgery, 2                 |    |       |
| Pennsylvania, 9         |     |       | Spine, 13                          |    |       |
| Other states, 108       |     |       | other surgical, 5                  |    |       |
| <b>Asia</b>             |     | 2.3%  | Geriatrics                         | 1  | 0.5%  |
| China                   | 1   |       | Gynaecology & obstetrics           | 8  | 3.7%  |
| Iran                    | 1   |       | Infectious disease                 | 1  | 0.5%  |
| Kuwait                  | 1   |       | Internal medicine                  | 12 | 5.6%  |
| Lebanon                 | 1   |       | Multiple                           | 3  | 1.4%  |
| Singapore               | 1   |       | Nephrology                         | 1  | 0.5%  |
| <b>Europe</b>           |     | 10.6% | Neurology                          | 2  | 0.9%  |
| Andalusia               | 1   |       | Oncology                           | 37 | 17.2% |
| Germany                 | 1   |       | Ophthalmology                      | 3  | 1.4%  |
| Italy                   | 3   |       | Orthopaedic                        | 1  | 0.5%  |
| Norway                  | 1   |       | Pain medicine                      | 3  | 1.4%  |
| Serbia                  | 1   |       | Paediatrics <i>of which</i>        | 19 | 8.8%  |
| Spain                   | 2   |       | Appendicitis, 3                    |    |       |
| Netherlands             | 9   |       | Emergency & acute care, 2          |    |       |
| UK                      | 4   |       | Neonatal, 3                        |    |       |
| <b>Oceania</b>          |     | 1.9%  | Oncology, 1                        |    |       |
| Australia               | 4   |       | Surgical, 5                        |    |       |
| <b>Transcontinental</b> |     | 0.9%  | Surgical, plastic surgery, 2       |    |       |
| Russia                  | 1   |       | Other paediatric, 3                |    |       |
| Turkey                  | 1   |       | Toxicology                         | 1  | 0.5%  |
|                         |     |       | Urology                            | 4  | 1.9%  |

**Table 1.** Characteristics of value-based health care studies measuring costs (n=215).

### Which cost measurement methods are currently being used to facilitate VBHC?

To answer RQ1, we look at how costs were measured. A summary of our findings is presented in **Table 2**. The literature contains many overlapping and contradicting terms, as costs can refer to insurer costs, reimbursements, hospital costs, or patient costs. About half (n=110, 51.2%) take the provider perspective, meaning costs were calculated for the hospital or care facility. Many studies use charges or payments because hospital cost data are unavailable, considering charges to be a relative proxy. Some studies use terms such as ‘costs,’ ‘charges,’ ‘prices,’ ‘payments,’ and ‘reimbursements’ interchangeably, making it difficult to differentiate [17,18,27–30]. For example, Jain et al, [17] stated, “The terms reimbursement, cost, and payment have been used interchangeably throughout the text to represent actual amounts paid by insurers.” Similarly, Robles et al, [30] explained, “Total hospital charges were utilized in this standardized costing analysis. Hospital charge data provides a relative measure of the ‘cost’ of episodes of care, as actual cost data are generally not ascertainable in the healthcare setting.” When calculating costs with TDABC, Ahluwalia et al, [31] called these costs ‘prices.’ To address this confusion, some recent studies refer to provider costs as the ‘true cost’ of care [6,7,9,19]. A portion of studies comparing several cost types [19,20] also differentiate ‘traditional hospital accounting’ costs vs. ‘true costs’ calculated with TDABC [6,9,20,32,33].

| Characteristic                            | Studies |                     | Perspectives  |            |
|-------------------------------------------|---------|---------------------|---------------|------------|
|                                           | n       | %                   | n             | %          |
| Cost perspective                          |         |                     |               |            |
| Provider                                  | 110     | 51.2%               | 111           | 51.6%      |
| Insurer                                   | 103     | 47.9%               | 106           | 49.3%      |
| Patient                                   | 2       | 0.9%                | 5             | 2.3%       |
| N*                                        | 215     |                     | 222           |            |
|                                           |         | All studies (n=215) | Provider only | Payer only |
| Cost types included                       |         |                     |               |            |
| Direct                                    | 28      | 13.0%               | 24            | 2          |
| Direct and indirect                       | 177     | 81.9%               | 84            | 93         |
| Unspecified                               | 10      | 4.6%                | 2             | 8          |
| Costs measurement implementation          |         |                     |               |            |
| No, costs measured for purpose of study   | 34      | 15.7%               | 33            |            |
| Yes, costing method is implemented        | 39      | 17.6%               | 39            |            |
| Unspecified or not applicable             | 142     | 66.2%               | 38            | 102        |
| Costs coverage                            |         |                     |               |            |
| Full care path                            | 47      | 21.8%               | 30            | 16         |
| Full care path (full surgical episode)    | 17      | 7.4%                | 13            | 4          |
| Partial care path (full surgical episode) | 22      | 8.3%                | 19            | 3          |
| Partial care path                         | 86      | 42.1%               | 37            | 49         |
| Unspecified                               | 43      | 19.9%               | 11            | 31         |

*Note:* N differs between studies and perspectives because seven studies measured two cost types.

**Table 2.** Characteristics of costing methods in value-based health care

We categorized studies based on the cost types they include. Both direct and indirect costs were considered by 177 (81.9%) studies, while 28 (13.0%) papers only included direct costs.

Next, we looked at whether costs were calculated for a complete care path. We found 64 (29.8%) studies measure costs for a full care path, of which 16 (7.4%) are full surgical episodes but labelled so without considering all pre- or post-surgical costs. The remaining 86 (42.1%) measures costs for a partial care path.

**Table 3** categorizes studies based on their costing method used. For those papers measuring costs within the care provider, we found two clear categories in line with management

1  
2  
3 accounting literature[24]. The first is direct costing (n=23), where direct costs of care are summed  
4  
5 up and indirect costs are not considered. This implies that if costs cannot causally be attributed to  
6  
7 the treatment of a specific patient, they are not considered and hence neglected when making  
8  
9 managerial decisions [24].  
10  
11

12  
13 Studies considering direct and indirect costs use absorption costing, whereby indirect costs  
14  
15 are allocated to patients [31]. These include but are not limited to TDABC (n=31) and ABC (n=7),  
16  
17 in which costs are allocated per individual care activity (e.g., a consultation or treatment step). The  
18  
19 remaining absorption costing papers (n=47) also consider direct and indirect costs, but how  
20  
21 indirect costs are attributed to activities are not reported. Authors of absorption costing studies  
22  
23 state that cost information was calculated based on diagnosis-related group costs, micro costing,  
24  
25 bottom-up clinical costing, or hospital accounting system not further classified. A full list of all  
26  
27 terms used is presented in the **online supplementary appendix**.  
28  
29  
30  
31  
32  
33  
34  
35  
36  
37  
38  
39  
40  
41  
42  
43  
44  
45  
46  
47  
48  
49  
50  
51  
52  
53  
54  
55  
56  
57  
58  
59  
60



| Perspective     | Method                                     | n  |
|-----------------|--------------------------------------------|----|
| <i>Provider</i> | Direct costs only                          |    |
|                 | Direct costing                             | 23 |
|                 | Absorption costing                         |    |
|                 | ABC                                        | 7  |
|                 | TDABC                                      | 31 |
|                 | Other                                      | 47 |
|                 | Not specified                              | 3  |
| <i>Insurer</i>  | Charges & reimbursements                   |    |
|                 | Charges, reimbursements, claims            | 81 |
|                 | Charges adjusted with cost-to-charge ratio | 25 |
| <i>Patient</i>  | Out-of-pocket costs to patient             | 5  |

*Note:* Total number of studies here is 222; seven studies measure two cost types. Studies are classified based on actual costs included and methods described, not necessarily the labels used by authors.

**Table 3.** Overview of cost measurement methods used in value-based health care

### How do these costing methods facilitate VBHC?

To answer RQ2, we extracted all consequences described by papers related to the costing method.

Not all studies included to address RQ1 describe facilitating VBHC, or the consequences of the cost information generated. Here, we were looking for how the costing information facilitated VBHC, similar to Etges et al, [3]. These reported consequences were grouped inductively, revealing four categories:

1. Identification of cost drivers, in terms of cost items (e.g., staff costs, material costs) or activities (e.g., surgery, initial consult; n=48).
2. Comparison of costs across patients' groups, care providers, or procedures (n=39).
3. Measured cost difference, or cost saving, at equal or better care (n=26).
4. Suggested or measured care path improvements (n=40).

These studies are presented in **Table 4**. The studies reporting these facilitators used ABC (n=6), TDABC (n=29), other absorption costing methods (n=12), or direct costing (n=3).

| Study Characteristics |                                            |                |                 |        | Best practices |     |     |     | Value-Based consequences of costing information |                                                               |     |                                                                                                   |                      |
|-----------------------|--------------------------------------------|----------------|-----------------|--------|----------------|-----|-----|-----|-------------------------------------------------|---------------------------------------------------------------|-----|---------------------------------------------------------------------------------------------------|----------------------|
|                       | Medical Specialty                          | Costing method | period          | Centre | Study type     | PM  | EI  | DO  | CG                                              | Compare costs across                                          | ICD | MPS                                                                                               | Care path adjustment |
| [34]                  | Internal medicine                          | TDABC          | partial         | single | retro          | yes | yes |     | items, activities                               |                                                               | yes |                                                                                                   | suggested            |
| [33]                  | Surgical, orthopaedic, rotator cuff repair | TDABC          | full (FSE)      | single | retro          | yes |     | yes | items, activities                               | surgeons, two alternative treatments                          | yes | yes, ± \$727 about the mean per patient                                                           | suggested            |
| [4]                   | Cardiology, surgical                       | TDABC          | full (FSE)      | multi  | retro          | yes | yes | yes | items, activities                               | hospitals, procedures                                         | yes | yes, estimate 51.0% of procedure cost                                                             | yes                  |
| [10]                  | Oncology                                   | TDABC          | full            | single | retro          | yes | yes | yes | items, activities                               | treatment care paths                                          | yes | \$2,302 (25.0%) difference across treatments                                                      | suggested            |
| [35]                  | Surgical, orthopaedic                      | TDABC          | full (FSE)      | single | retro          | yes |     |     | items, activities                               | patients                                                      | yes |                                                                                                   | suggested            |
| [36]                  | Surgical, orthopaedic                      | TDABC          | full (FSE)      | single | retro          | yes |     |     | items, activities                               | patients                                                      | yes |                                                                                                   | suggested            |
| [19]                  | Surgical, orthopaedic                      | TDABC          | full (FSE)      | single | retro          | yes |     | yes | items, activities                               | costing methods (TA and TDABC)                                | yes |                                                                                                   | suggested            |
| [20]                  | Surgical, orthopaedic                      | TDABC          | full (FSE)      | single | retro          | yes |     | yes | items, activities                               | five treatments, cost vs. reimbursement                       | yes |                                                                                                   |                      |
| [37]                  | Paediatric, surgical, plastic surgery      | TDABC          | full (FSE)      | multi  | pro            | yes |     | yes | items, activities                               | treatment care paths                                          | yes | up to \$8900, but long-term outcomes yet unknown                                                  | suggested            |
| [38]                  | Emergency & acute care                     | TDABC          | full (multiple) | multi  | retro          | yes | yes | yes | items, activities                               | eight care paths for acute ureteral stones (patient journeys) | yes | yes, \$6614 difference across care paths                                                          | suggested            |
| [39]                  | Surgical, orthopaedic                      | TDABC          | full (FSE)      | single | retro          | yes |     | yes | items, activities                               | surgeons                                                      | yes |                                                                                                   | suggested            |
| [40]                  | Oncology                                   | TDABC          | partial         | single | pro            | yes | yes | yes | items, activities                               | treatments and individual care paths                          | yes | yes, cost difference of up to 3.33 times, depending on case mix                                   | suggested            |
| [41]                  | Oncology (incl. surgery)                   | TDABC          | full            | single | retro          | yes |     | yes | items, activities                               |                                                               | yes |                                                                                                   | suggested            |
| [42]                  | Oncology                                   | TDABC          | partial (FSE)   | single | retro          | yes |     |     | items                                           | pre and post implementation                                   | yes | yes, mean cost savings of €309 per patient                                                        | yes                  |
| [43]                  | Cardiology                                 | AC (other)     | partial         | multi  | retro          |     |     |     | items                                           | patient journeys                                              | yes |                                                                                                   | suggested            |
| [44]                  | Emergency & acute care                     | AC (other)     | partial         | single | retro          | yes |     |     | items                                           | surgeons                                                      | yes |                                                                                                   |                      |
| [45]                  | Surgical, bariatric                        | AC (other)     | full (FSE)      | single | retro          |     |     |     | items                                           | treatment                                                     | yes |                                                                                                   |                      |
| [46]                  | Gynaecology & obstetrics                   | AC (other)     | full            | single | retro          | yes |     |     | items, activities                               | procedures                                                    | yes | yes, \$967 per patient                                                                            | suggested            |
| [47]                  | Emergency & acute care                     | AC (other)     | partial         | single | retro          |     |     |     | items, activities                               |                                                               | yes |                                                                                                   |                      |
| [48]                  | Surgical, colorectal                       | AC (other)     | partial (FSE)   | single | retro          |     |     |     | items                                           | intervention                                                  | yes | yes, reduced variable cost, similar total cost                                                    | yes                  |
| [21]                  | Surgical, orthopaedics, fracture           | ABC            | partial (FSE)   | single | retro          |     |     |     | items                                           | patients, patient groups, demographics                        | yes |                                                                                                   |                      |
| [49]                  | Surgical, orthopaedic, arthroplasty        | ABC            | full (FSE)      | single | both           |     | yes | yes | items, activities                               | treatment care paths                                          | yes | estimate €2,054,000 annually                                                                      | yes                  |
| [50]                  | Surgical, spine                            | ABC            | Full            | single | retro          | yes |     |     | items, activities                               | patients, patient groups                                      | yes |                                                                                                   | suggested            |
| [6]                   | Paediatric, surgical                       | TDABC          | full (FSE)      | single | both           | yes |     | yes | items, activities                               | costing methods (TA and TDABC)                                | yes | 20.0% and without care path alteration                                                            | suggested            |
| [51]                  | Oncology                                   | TDABC          | full (FSE)      | single | retro          | yes | yes | yes | items, activities                               | treatment care paths                                          | yes | yes, estimate for each 10.0% decrease in case duration, total costs could decrease by about 8.0%. | suggested            |
| [31]                  | Surgical, orthopaedic                      | TDABC          | full (FSE)      | single | pro            | yes | yes | yes | items, activities                               | treatment care paths                                          | yes | £2,018 per patient                                                                                | suggested            |
| [52]                  | Paediatric, neonatal                       | TDABC          | partial         | single | retro          | yes | yes | yes | items, activities                               | Pre and post intervention                                     | yes | yes, 36.0% or \$92,000 per tracheostomy care cycle                                                | yes                  |
| [53]                  | Surgical, cardiac/thoracic                 | AC (other)     | partial         | multi  | retro          | yes |     |     | items                                           | patients, implant devices                                     | yes |                                                                                                   | suggested            |

|      |                                    |                |                 |              |       |              |           |           |                   |                                                            |           |                                                                      |                        |           |
|------|------------------------------------|----------------|-----------------|--------------|-------|--------------|-----------|-----------|-------------------|------------------------------------------------------------|-----------|----------------------------------------------------------------------|------------------------|-----------|
| [54] | Oncology, surgical                 | AC (other)     | partial         | single       | retro |              |           |           | items             |                                                            | yes       | yes, multiple                                                        |                        |           |
| [55] | Multiple                           | TDABC          | full            | multi, pilot | retro | yes          | yes       | yes       | items, activities | before and after intervention (IPUs)                       | yes       | yes, quarterly costs declined                                        | suggested              |           |
| [56] | Oncology                           | TDABC          | partial (PSE)   | single       | pro   | yes          |           | yes       | items, activities | treatment care paths (parallel vs. induction design in OR) | yes       | yes, estimate OR time reduction of 55 min, or \$,2818 missed revenue | suggested              |           |
| [57] | Surgical, orthopaedics fracture    | TDABC          | partial (FSE)   | single       | both  | yes          |           |           | items             |                                                            | yes       |                                                                      | suggested              |           |
| [58] | Surgical, foot debridement         | TDABC          | partial (FSE)   | single       | retro |              |           | yes       | items             | before and after intervention                              | yes       |                                                                      | yes                    |           |
| [59] | Ophthalmology                      | TDABC          | full            | single       | retro | yes          | yes       | yes       | items, activities |                                                            | yes       |                                                                      | suggested              |           |
| [60] | Gynaecology & obstetrics, surgical | AC (other)     | partial (FSE)   | single       | retro |              |           |           | items             |                                                            | yes       |                                                                      | suggested              |           |
| [61] | Gynaecology & obstetrics, surgical | AC (other)     | partial (FSE)   | single       | retro |              |           |           | items             |                                                            | yes       |                                                                      |                        |           |
| [62] | Multiple                           | Direct costing | partial         | single       | retro |              |           |           | items             |                                                            | yes       |                                                                      |                        |           |
| [63] | Surgical, orthopaedic              | Direct costing | full (FSE)      | multi        | retro |              |           |           | items             | intervention                                               |           | yes, £255 per patient                                                | yes                    |           |
| [5]  | Surgical, carpal tunnel release    | TDABC          | partial (FSE)   | multi        | retro | yes          |           | yes       | items, activities | multiple treatment care paths                              | yes       | yes, 70.9% (\$27,103) and 31.6% (\$178)                              | yes                    |           |
| [64] | Surgical, appendicitis             | AC (other)     | partial (FSE)   | single       | pro   |              | yes       | yes       | items             | pre and post intervention (dashboard)                      | yes       | yes, decreased by \$496 per operation                                | yes                    |           |
| [65] | Surgical, orthopaedic              | Direct costing | partial (FSE)   | single       | retro | yes          |           |           | items             | intervention                                               | yes       |                                                                      |                        |           |
| [8]  | Urology                            | TDABC          | partial         | single       | pro   | yes          |           | yes       | items, activities |                                                            | yes       | yes, estimate two hours per cycle                                    | suggested              |           |
| [66] | Paediatrics, appendicitis          | TDABC          | full (FSE)      | single       | pro   | yes          | yes       | yes       | items, activities | treatment care paths (pre and post intervention)           | yes       | 11.0% cost reduction, and 51.0% hospitalization time reduction       | yes, several           |           |
| [67] | Urology                            | AC (other)     | partial         | multi        | retro |              | yes       |           | items             |                                                            |           |                                                                      |                        |           |
| [7]  | Oncology, surgical, 11 surgeries   | TDABC          | Partial (FSEs)  | single       | retro | yes          |           |           | items, activities | potential staffing ratios                                  | yes       | estimate 13.0-28.0% per surgery type                                 | modelled and suggested |           |
| [9]  | Oncology                           | TDABC          | full            | single       | retro | yes          | yes       | yes       | items, activities | treatments (high-dose vs. low-dose brachytherapy)          | yes       | \$2,668 difference across treatments                                 | yes                    |           |
| [68] | Urology                            | TDABC          | partial (FSE)   | single       | retro | yes          | yes       |           | items, activities | five treatment care paths                                  | yes       | yes, 400.0% increase from least to most expensive pathways           | suggested              |           |
| [32] | Surgical, neurosurgery             | ABC            | partial (FSE)   | single       | retro | yes          |           |           | items, activities | patients                                                   | yes       | yes, 25.0%                                                           | yes, several           |           |
| [69] | Surgical, neurosurgery             | ABC            | partial (FSE)   | single       | retro | yes          |           |           | items, activities | patients                                                   | yes       |                                                                      | suggested              |           |
| [70] | Paediatric plastic surgery         | ABC            | partial, 1 year | single       | retro |              |           |           | items             | patients                                                   | yes       |                                                                      | suggested              |           |
|      |                                    |                |                 |              |       | <b>Count</b> | <b>34</b> | <b>16</b> | <b>24</b>         |                                                            | <b>39</b> | <b>47</b>                                                            | <b>26</b>              | <b>40</b> |

*Note:* ABC: Activity-Based costing; TDABC: Time-Driven activity-based costing; FSE: Full surgical episode; AC (other): Absorption costing, other; PSE: Partial surgical episode; Retro: Retrospective; Pro: Prospective; PM: Process mapping; EI: Expert input; DO: Direct Observation; CG: Cost grouping, cost items only or activities; ICD: Identify cost drivers; MPS: Measured provider cost savings (at equal or better care). Costing methods are classified based on actual reported costs and methods applied, not necessarily the labels used by authors.

**Table 4.** Costing method applications, method used, and consequences, sorted by year.

### *Activity-based costing*

All six studies applying ABC explained that they did so because this was the provider's existing costing method. Three of these studies measured costs for a full surgical episode [21,32,69] as part of a longer care path, two measured costs for a full care path [49,50], and one measured costs of a partial care path [70]. While these studies all applied ABC, their ability to facilitate VBHC differs. Jacobs et al [50] measured costs for a complete care path for patients with adult spinal deformity, a complex care path spanning about one year. The authors compared costs across patient groups and patients, found major cost drivers, and suggested where to concentrate cost containment. Similarly, McLaughlin et al [32,69] both measured costs, identified cost drivers and evaluated targeted cost containment initiatives. In their paper [32], the cost containment initiatives were informed by the costing information—activities with the highest costs were targeted for reduction—and a 25.0% total cost reduction was achieved. While McLaughlin et al [69] identified comorbidities and demographics strongly related to the total costs in patients undergoing neurosurgery, Wise et al [21] found the opposite for geriatric hip fracture patients. This study identified cost drivers, and costs were compared across patient groups. McLaughlin et al [71] were able to measure and record costs savings of 25.0%, and Vanni et al [49] successfully predicted about €2,054,000 annual cost savings associated with an alternative enhanced recovery pathway.

### *Time-driven activity-based costing*

The largest portion of papers included for RQ2 used TDABC. These studies were able to identify significant cost drivers linked to activities in a care path, and some suggest where to target improvement initiatives [4,6–8,10,33,40,59]. A large selection of TDABC studies was able to suggest (n=19) [6,8,10,19,33–38,40,41,51,55–59,68] or measure (n=6) [5,9,31,42,52,66] care path improvements as shown in **table 4**.

1  
2  
3 The length and specificity of the care paths costs varies greatly. Some studies were narrow in scope  
4 and breadth, calculating costs for sub-sections of a single care path or surgical procedure  
5 [6,8,38,39,56]. Isaacson et al [8] calculated costs for cleaning a single reusable piece of equipment,  
6 while others costed single surgical days [6], compared alternative surgeons [39] or anaesthesia  
7 solutions within a care path [56]. In this group, McClintock et al [38] took the broadest perspective  
8 by mapping individual patient journeys.  
9  
10  
11  
12  
13  
14  
15

16  
17  
18 The largest group of TDABC studies measured costs across care paths, within a single  
19 provider, and for a single diagnosis (n=10) [9,10,31,33,37,40–42,51,66]. Typically, these studies  
20 compared costs between a new intervention and usual care [9,10,31,51,52,66], or alternative care  
21 paths [33,37,40,42] in order to measure cost savings.  
22  
23  
24  
25  
26

27  
28 Some studies were broader in scope, costing multiple care paths or treatments within one  
29 specialty [5,7,20,68], an entire department [34,59], or multiple practice units [55] or providers [4].  
30 Some compared ‘true costs’ calculated with TDABC across care providers within specialties or  
31 care paths [4,37], while others argued TDABC costs are too subjective to be compared across  
32 hospitals [10,38]. While most identified studies compared costs across care paths, some also  
33 compared costs across patient groups [19,35,36] or even individual patient journeys [38,40].  
34  
35  
36  
37  
38  
39  
40  
41

42 Technology played a large role in studies aiming to reduce costs. One study was able to  
43 suggest how to use technology more efficiently [6], and some show how technology can reduce  
44 costs [37,40,51] by integrating technological investments in the TDABC cost calculated.  
45 Conversely, studies using unspecified absorption methods did not include investments in  
46 technology such as a Da Vinci robot mentioned above [60,61]. This is surprising because  
47 absorption costing methods require indirect costs to be allocated.  
48  
49  
50  
51  
52  
53  
54  
55  
56  
57

### *Analyses enabled by activity-based and time-driven activity-based costing*

Several ABC and TDABC studies compared costs calculated with traditional accounting costs [6,19,20] or reimbursements [20,21], finding that prices do not equal costs. Some conducted quantitative analyses using the cost information generated with ABC or TDABC. These include regression analyses to identify correlations [7,33,35,36,40], compare patient groups [20,35,36], and compare costs and outcomes across a matched patient sample [40].

Two recent studies conducted patient-level value-analysis (PLVA)[33,40], comparing patient-reported outcomes with patient-level TDABC costs. Wise et al [33] did so for rotator cuff repair surgeries over the span of one year, while McCreary et al [57] analyzed ankle fractures. Both studies found costs to be unrelated to patient-reported outcome measures.

### *Other absorption costing methods and direct costing*

Other absorption costing methods used by studies were labelled as micro costing (n=5), bottom-up clinical costing [47], or were described but not labelled (n=6). Most were able to find cost drivers (n=12, for details see **table 4**) and some could compare costs within providers. Notably, Robinson et al,[64] used the cost information to build and evaluate a dashboard that provides real-time feedback to surgeons during operations and monthly, decreasing costs significantly. Some studies omitted cost categories, e.g., equipment [61]. Direct costing enabled cost driver identification [62,63,65], and in some instances granular cost measurement.

### *Best practices*

After finding these four facilitators, we compared studies to find common practices. This is of particular importance because costing methods are not labelled consistently. For example, many studies refer to ABC as 'bottom-up costing.' To look beyond labels, we compared the exact methods used to measure costs. We found that studies able to facilitate VBHC used process

1  
2  
3 mapping (n=34), expert input (n=17), and/or direct observations (n=24) when measuring costs.  
4  
5 These practices overlap with TDABC best practices but are not exclusive to TDABC, as shown in  
6

7  
8 **Table 4.**  
9

10  
11 Studies that made specific care path improvement suggestions used process mapping, and  
12 especially those with a multidisciplinary team reported great benefits [4,9,10,19]. This enables  
13 experts (doctors, care professionals, administrators) with the required knowledge and experience  
14 to reflect critically on the process [4,9,10,19] which resulted in actionable suggestions. In  
15 comparison, studies that did not use process mapping could suggest minimizing high-cost items  
16 (e.g., total operating time, nursing costs) but could not couple these suggestions to activities, or  
17 chronological points in the care path. Only commenting on cost items, instead of chronological  
18 time points, limits the ability of cost information to inform management on where to focus process  
19 improvement initiatives.  
20  
21  
22  
23  
24  
25  
26  
27  
28  
29  
30  
31

32 Expert input while creating process maps or measuring costs was often cited by authors as  
33 being valuable, especially for estimating preparation time or other behind-the-scenes activities that  
34 do not involve the patient but are critical to delivering care. Some studies unable to use expert  
35 input cited this as a limitation of their work. Rare cases also evaluated the impact of costing  
36 information, for example by involving experts in evaluating a dashboard [64].  
37  
38  
39  
40  
41  
42  
43

44 Lastly, direct observations were used by some studies, particularly those calculating  
45 process times down to the minute or those measuring costs for individual patient journeys.  
46  
47  
48

49 **DISCUSSION**  
50  
51  
52  
53  
54  
55  
56  
57  
58  
59  
60

1  
2  
3 This review focused on VBHC studies measuring or estimating costs, and on identifying which  
4 costing methods can facilitate VBHC. By assessing the consequences of the costing methods used,  
5  
6 we were able to identify the characteristics of costing methods that facilitate VBHC.  
7  
8  
9

10 Previous research found that TDABC can facilitate VBHC through cost containment and  
11 process improvements [3,15]. We build on these by comparing value-based consequences across  
12 costing methods. While the field is young and alternatives seem scarce, we have found  
13 considerable evidence that TDABC and ABC can indeed facilitate VBHC. As previously  
14 mentioned, TDABC is considerably easier to implement than ABC, which leads us to recommend  
15 it over ABC. We found no well-documented alternatives to TDABC or ABC in our review. Not  
16 all TDABC studies were able to achieve the facilitating factors we describe here. We emphasize  
17 the need for future studies to follow TDABC guidelines properly and to document the methods  
18 used explicitly. Several included studies in this review simply stated that TDABC was applied,  
19 outsourced, used with incomplete costs, or used without listing exact cost rates.  
20  
21  
22  
23  
24  
25  
26  
27  
28  
29  
30  
31  
32  
33

34 Care path start and endpoints are well-documented by authors, but remain inconsistent. To  
35 view costs in relation to outcomes as suggested by Porter [2], total costs from start to finish of a  
36 trajectory must be considered [72]. Many studies chose the start and endpoints to their cost  
37 measurement windows ad hoc and labelled this a full care path. Consequently, this results in  
38 inconsistencies across studies, limiting comparisons. A selection of more recent studies measured  
39 costs for a true full care path from beginning to end. Future research should do the same, and  
40 explicitly define start and endpoints. This would allow for consistent comparison across providers.  
41 Like ICHOM standard outcome sets produced by the International Consortium for Health  
42 Outcomes Measurement, costs could be catalogued and compared for full care paths. In a recent  
43 expert consensus study, experts reached consensus on the need for focusing on full care paths [72].  
44  
45  
46  
47  
48  
49  
50  
51  
52  
53  
54  
55  
56  
57  
58  
59  
60



1  
2  
3 Furthermore, we see a trade-off in the specificity and length of the care path costed. Studies  
4 measuring costs for parts of a care path (e.g., a surgery) can provide detailed costs for that portion  
5 of the care path, but not total costs of care per patient because the remainder of that patient's care  
6 path is not included. Some surgical studies measured costs for partial care paths, and often  
7 concluded that operating theatre time should be minimized due to high surgeon and operating  
8 theatre costs.  
9  
10  
11  
12  
13  
14  
15  
16  
17

18 This is a conclusion with limited impact for the value agenda [13] because it does not  
19 provide cost information for an entire care path, or advice for how to circumvent the surgery. Yet,  
20 studies measuring costs for complete care paths presented less detailed costing methods (due to  
21 the sheer length of the care path) but were able to compute total costs of care per patient. This  
22 enabled cost benchmarking across providers, as well as cost comparisons of new vs. standard care,  
23 or treatment alternatives. This allowed providers to steer towards outcomes at lowest costs to  
24 maximize value. Future research should focus on measuring costs for full care paths, and on  
25 comparing costs to outcomes as demonstrated by some of the more recently published studies  
26 included in our review [33,40,57].  
27  
28  
29  
30  
31  
32  
33  
34  
35  
36  
37  
38

39 Our review highlights the need to involve medical professionals in this process, both when  
40 implementing costing methods as well as when evaluating the results. Future cost measurement  
41 studies, and hospitals looking to implement TDABC, should do so with multidisciplinary teams.  
42 Studies that have involved medical professionals in the process of cost measurement and usage  
43 were able to improve care paths via improvement initiatives and/or dashboards. This suggests that  
44 generating and using costing information can be viewed as a process. Future qualitative research  
45 should follow this process to better understand the mechanisms through which this happens, and  
46  
47  
48  
49  
50  
51  
52  
53  
54  
55  
56  
57  
58  
59  
60

1  
2  
3 the impact of staff involvement on cost containment success. Previous research suggests that staff  
4 involvement is critical as it builds trust in the model [73].  
5  
6

### 7 8 **Limitations and future research** 9

10  
11 We acknowledge several limitations related to the scope, breadth, and quality of the included  
12 studies. Firstly, our search strategy does not capture studies that measure costs but do not label the  
13 study as VBHC-oriented. Not all TDABC studies make value-based claims or contributions and  
14 may therefore be underrepresented in our review. Additionally, not all studies explicitly discuss  
15 the impact or consequence of the costing method applied, which may impact our findings. Future  
16 qualitative research should implement TDABC and evaluate whether the facilitating factors found  
17 in this review are achieved. Secondly, sophisticated methods such as TDABC are currently used  
18 in predictable and/or short care paths such as orthopaedic surgeries. Further research testing the  
19 feasibility and practicality of TDABC in different settings, such as emergency on-call care, or long  
20 care paths such as fertility treatments, is warranted. Our findings may have limited generalizability  
21 across medical specialties as indicated in **Table 1**. Finally, we rely on the reporting of authors  
22 which differs in style and quality across disciplines and journals. We partially circumvented this  
23 limitation by looking beyond the cost measurement labels used by authors, and extracting the costs  
24 included and methods used. However, we cannot exclude the potential for error, or lack of explicit  
25 reporting, in the studies reviewed.  
26  
27  
28  
29  
30  
31  
32  
33  
34  
35  
36  
37  
38  
39  
40  
41  
42  
43  
44  
45

### 46 **Conclusion** 47

48  
49 This systematic review reveals that cost information at the treatment or patient level, for complete  
50 care paths, enables value-based decision making through several mechanisms. Such cost  
51 information directs quality and process improvement initiatives, next to informing reimbursement  
52  
53  
54  
55  
56  
57

1  
2  
3  
4  
5  
6  
7  
8  
9  
10  
11  
12  
13  
14  
15  
16  
17  
18  
19  
20  
21  
22  
23  
24  
25  
26  
27  
28  
29  
30  
31  
32  
33  
34  
35  
36  
37  
38  
39  
40  
41  
42  
43  
44  
45  
46  
47  
48  
49  
50  
51  
52  
53  
54  
55  
56  
57  
58  
59  
60

amounts. Practitioners and academics should apply process mapping, expert input and observations when implementing absorption costing systems such as ABC or TDABC. Hospital cost measurement is strongly advised.

For peer review only

1  
2  
3 **Patient and public involvement:** This study did not involve patients or the public in designing,  
4 executing, or reporting of the research.  
5

6 **Acknowledgement:** We thank W.M. Bramer, biomedical information specialist from the  
7 Erasmus MC. We also thank our fellow members of the value-based healthcare consortium  
8 involving the Amsterdam UMC, Erasmus MC, Radboudumc, and Erasmus University  
9 Rotterdam, led by J.G.M. Jelsma and M.C. de Bruijne.  
10

11  
12 **Funding:** This work was supported by Dutch ministry of health, welfare, and sport through grant  
13 number 330843.  
14

15 **Data sharing:** The supplementary appendix and data file are available from the Erasmus Data  
16 Repository (DOI: 10.25397/eur.20279883). This DOI is reserved but not yet published. The  
17 appendix and raw data file were submitted with the manuscript.  
18

19  
20 **Competing interests:** The third author, KA, was a speaker at the 2022 TDABC conference and  
21 was reimbursed for his stay in Lisbon by the TDABC consortium.  
22

23 **Contributors** ML: study design, screening of titles and abstracts for inclusion, data analysis and  
24 interpretation, writing. PP: screening of titles and abstracts for inclusion, assisted in writing. KA:  
25 study design, assisted in interpretation of results, assisted in writing. HvE: study design,  
26 screening of titles and abstracts for inclusion, data analysis and interpretation, assisted in writing.  
27  
28

### 29 **ORCID ID**

30  
31 Maura Leusder 0000-0001-7134-1003  
32 Petra Porte 0000-0003-0228-1013  
33 Kees Ahaus 0000-0001-9973-3746  
34 Hilco van Elten 0000-0003-3909-5521  
35  
36  
37  
38  
39  
40  
41  
42  
43  
44  
45  
46  
47  
48  
49  
50  
51  
52  
53  
54  
55  
56  
57  
58  
59  
60

## REFERENCES

- 1 Kaplan, Porter. How to solve the cost crisis in health care. *Harv Bus Rev* 2011;**89**:46–52, 54, 56-61 passim. <https://www.ncbi.nlm.nih.gov/pubmed/21939127>
- 2 Porter ME. What Is Value in Health Care? *N Engl J Med* 2010;**363**:2477–81. doi:10.1056/NEJMp1011024
- 3 Etges APB da S, Ruschel KB, Polanczyk CA, *et al* Advances in Value-Based Healthcare by the Application of Time-Driven Activity-Based Costing for Inpatient Management: A Systematic Review. *Value Health* 2020;**23**:812–23. doi:10.1016/j.jval.2020.02.004
- 4 Etges, Cruz LN, Schlatter R, *et al* Time-driven activity-based costing as a strategy to increase efficiency: An analyses of interventional coronary procedures. *Int J Health Plann Manage* Published Online First: 9 September 2021. doi:10.1002/hpm.3320
- 5 Martin JA, Mayhew CR, Morris AJ, *et al* Using Time-Driven Activity-Based Costing as a Key Component of the Value Platform: A Pilot Analysis of Colonoscopy, Aortic Valve Replacement and Carpal Tunnel Release Procedures. *J Clin Med Res* 2018;**10**:314–20. [http://www.ncbi.nlm.nih.gov/entrez/query.fcgi?holding=inleurlib\\_fft&cmd=Retrieve&db=PubMed&dopt=Citation&list\\_uids=29511420](http://www.ncbi.nlm.nih.gov/entrez/query.fcgi?holding=inleurlib_fft&cmd=Retrieve&db=PubMed&dopt=Citation&list_uids=29511420)
- 6 Bodar YJL, Srinivasan AK, Shah AS, *et al* Time-Driven activity-based costing identifies opportunities for process efficiency and cost optimization for robot-assisted laparoscopic pyeloplasty. *J Pediatr Urol* 2020;**16**:460.e1-460.e10. doi:10.1016/j.jpuro.2020.05.146
- 7 French KE, Guzman AB, Rubio AC, *et al* Value based care and bundled payments: Anesthesia care costs for outpatient oncology surgery using time-driven activity-based costing. *Healthc (Amst)* 2016;**4**:173–80. doi:10.1016/j.hjdsi.2015.08.007
- 8 Isaacson D, Ahmad T, Metzler I, *et al* Defining the Costs of Reusable Flexible Ureteroscope Reprocessing Using Time-Driven Activity-Based Costing. *J Endourol* 2017;**31**:1026–31. doi:10.1089/end.2017.0463
- 9 Ilg AM, Laviana AA, Kamrava M, *et al* Time-driven activity-based costing of low-dose-rate and high-dose-rate brachytherapy for low-risk prostate cancer. *Brachytherapy* 2016;**15**:760–7. <https://www.ncbi.nlm.nih.gov/pubmed/27720202>
- 10 Dziemianowicz M, Burmeister J, Dominello M. Examining the Financial Impact of Altered Fractionation in Breast Cancer: An Analysis Using Time-Driven Activity-Based Costing. *Pract Radiat Oncol* 2021;**11**:245–51. doi:10.1016/j.prro.2021.01.003
- 11 Cattel D, Eijkenaar F. Value-Based Provider Payment Initiatives Combining Global Payments With Explicit Quality Incentives: A Systematic Review. *Med Care Res Rev* 2020;**77**:511–37. doi:10.1177/1077558719856775

- 12 Counte MA, Howard SW, Chang L, *et al* Global Advances in Value-Based Payment and Their Implications for Global Health Management Education, Development, and Practice. *Front Public Health* 2018;**6**:379. doi:10.3389/fpubh.2018.00379
- 13 Porter ME, Teisberg EO. Redefining competition in health care. *Harv Bus Rev* 2004;**82**:64–76, 136. <https://www.ncbi.nlm.nih.gov/pubmed/15202288>
- 14 Rathert C, Mittler JN, Lee YSH. Patient-provider therapeutic connections to improve health care: Conceptual development and systematic review of patient measures. *Health Care Manage Rev* Published Online First: 14 February 2022. doi:10.1097/HMR.0000000000000339
- 15 Zanotto BS, Etges APB da S, Marcolino MAZ, *et al* Value-Based Healthcare Initiatives in Practice: A Systematic Review. *J Healthc Manag* 2021;**66**:340. doi:10.1097/JHM-D-20-00283
- 16 Gibbons C, Porter I, Gonçalves-Bradley DC, *et al* Routine provision of feedback from patient-reported outcome measurements to healthcare providers and patients in clinical practice. *Cochrane Database Syst Rev* 2021;**10**:CD011589. doi:10.1002/14651858.CD011589.pub2
- 17 Jain N, Brock JL, Phillips FM, *et al* Chronic preoperative opioid use is a risk factor for increased complications, resource use, and costs after cervical fusion. *Spine J* 2018;**18**:1989–98. doi:10.1016/j.spinee.2018.03.015
- 18 Rice-Townsend S, Barnes JN, Hall M, *et al* Variation in practice and resource utilization associated with the diagnosis and management of appendicitis at freestanding children's hospitals: Implications for value-based comparative analysis. *Ann Surg* 2014;**259**:1228–34. doi:10.1097/SLA.0000000000000246
- 19 Fang, Shaker J, Drew JM, *et al* The Cost of Hip and Knee Revision Arthroplasty by Diagnosis-Related Groups: Comparing Time-Driven Activity-Based Costing and Traditional Accounting. *J Arthroplasty* 2021;**36**:2674-2679.e2673. doi:10.1016/j.arth.2021.03.041
- 20 Fang, Shaker J, Hart P-A, *et al* Variation in the profit margin for different types of total joint arthroplasty. *J Bone Joint Surg Am* 2021;**Publish Ahead of Print**. doi:10.2106/JBJS.21.00223
- 21 Wise, Blaschke BL, Parikh HR, *et al* Variation of the Inpatient Cost of Care in the Treatment of Isolated Geriatric Intertrochanteric Hip Fractures. *Geriatr Orthop Surg Rehabil* 2020;**11**. doi:10.1177/2151459320976533
- 22 Keel G, Savage C, Rafiq M, *et al* Time-driven activity-based costing in health care: A systematic review of the literature. *Health Policy* 2017;**121**:755–63. doi:10.1016/j.healthpol.2017.04.013
- 23 Hoenigl M, Lo M, Coyne CJ, *et al* 4th Generation HIV screening in the emergency department: net profit or loss for hospitals? *AIDS Care* 2021;:1–5. doi:10.1080/09540121.2021.1995838

- 1  
2  
3 24 Zimmerman JL. *Accounting For Decision Making and Control Seventh Edition*. McGraw-Hill 2011. <http://digilib.umpalopo.ac.id:8080/jspui/handle/123456789/151>
- 4  
5  
6 25 Bramer WM, Milic J, Mast F. Reviewing retrieved references for inclusion in systematic reviews using endnote. *J Med Libr Assoc* 2017;**105**:84–7. doi:10.5195/jmla.2017.111
- 7  
8  
9 26 Pérez J, Díaz J, Garcia-Martin J, *et al* Systematic literature reviews in software engineering—enhancement of the study selection process using Cohen’s Kappa statistic. *Journal of Systems and Software* 2020;**168**:110657. doi:10.1016/j.jss.2020.110657
- 10  
11  
12  
13 27 Burnett RA Iii, Yang J, Courtney PM, *et al* Costs of unicompartmental compared with total knee arthroplasty : a matched cohort study over ten years. *Bone Joint J* 2021;**103-B**:23–31. doi:10.1302/0301-620X.103B6.BJJ-2020-2259.R1
- 14  
15  
16  
17 28 Sun LL, Cao DY, Yang JX, *et al* Value-based medicine analysis on loop electrosurgical excision procedure and CO2 laser vaporization for the treatment of cervical intraepithelial neoplasia 2. *J Obstet Gynaecol Res* 2012;**38**:1064–70. doi:10.1111/j.1447-0756.2011.01832.x
- 18  
19  
20  
21  
22  
23 29 Cronin KJ, Mair SD, Hawk GS, *et al* Increased Health Care Costs and Opioid Use in Patients with Anxiety and Depression Undergoing Rotator Cuff Repair. *Arthroscopy - Journal of Arthroscopic and Related Surgery* 2020;**36**:2655–60. doi:10.1016/j.arthro.2020.05.038
- 24  
25  
26  
27 30 Robles AJ, Kornblith LZ, Hendrickson CM, *et al* Health care utilization and the cost of posttraumatic acute respiratory distress syndrome care. *J Trauma Acute Care Surg* 2018;**85**:148–54. doi:10.1097/TA.0000000000001926
- 28  
29  
30  
31  
32 31 Ahluwalia R, Cook J, Raheman F, *et al* Improving the efficiency of ankle fracture care through home care and day-surgery units: Delivering safe surgery on a value-based healthcare model. *Surgeon* Published Online First: November 2020. doi:10.1016/j.surge.2020.08.004
- 33  
34  
35  
36 32 McLaughlin N, Upadhyaya P, Buxey F, *et al* Value-based neurosurgery: measuring and reducing the cost of microvascular decompression surgery. *J Neurosurg* 2014;**121**:700–8. doi:10.3171/2014.5.JNS131996
- 37  
38  
39  
40 33 Wise KL, Parikh HR, Okelana B, *et al* Measurement of value in rotator cuff repair: patient-level value analysis for the 1-year episode of care. *J Shoulder Elbow Surg* 2022;**31**:72–80. doi:10.1016/j.jse.2021.07.004
- 41  
42  
43  
44 34 Alibrahim A, Abdulsalam Y, Al Mutawa S, *et al* Towards value-based healthcare: Establishing baseline pharmacy care costs for diabetes management. *Int J Health Plann Manage* 2022;**37**:790–803. doi:10.1002/hpm.3370
- 45  
46  
47  
48  
49 35 Fang C, Hagar A, Gordon M, *et al* Differences in Hospital Costs among Octogenarians and Nonagenarians Following Primary Total Joint Arthroplasty. *Geriatrics* 2021;**6**:26. doi:10.3390/geriatrics6010026
- 50  
51  
52  
53 36 Fang C, Pagani N, Gordon M, *et al* Episode-of-Care Costs for Revision Total Joint Arthroplasties by Decadal Age Groups. *Geriatrics* 2021;**6**:49. doi:10.3390/geriatrics6020049
- 54  
55  
56  
57

- 1  
2  
3 37 Ganske IM, Sanchez K, Le E, *et al* Time-Driven, Activity-Based Costing of Presurgical Infant  
4 Orthopedics: A Critical Component of Establishing Value of Latham Appliance and  
5 Nasoalveolar Molding. *Plastic & Reconstructive Surgery* 2021;**147**:444–54.  
6 doi:10.1097/PRS.00000000000007669  
7  
8  
9 38 McClintock TR, Friedlander DF, Feng AY, *et al* Determining Variable Costs in the Acute  
10 Urolithiasis Cycle of Care Through Time-Driven Activity-Based Costing. *Urology*  
11 2021;**157**:107–13. doi:10.1016/j.urology.2021.05.102  
12  
13 39 Sethi RK, Pumpian RP, Drolet CE, *et al* Utilizing Lean Methodology and Time-Driven  
14 Activity-Based Costing Together: An Observational Pilot Study of Hip Replacement Surgery  
15 Utilizing a New Method to Study Value-Based Health Care. *J Bone Joint Surg Am* Published  
16 Online First: 14 October 2021. doi:10.2106/JBJS.21.00129  
17  
18 40 Thaker NG, Boyce-Fappiano D, Ning, *et al* Activity-Based Costing of Intensity-Modulated  
19 Proton versus Photon Therapy for Oropharyngeal Cancer. *International Journal of Particle*  
20 *Therapy* 2021;**8**:374–82. doi:10.14338/IJPT-20-00042.1  
21  
22 41 Kukreja JB, Seif MA, Mery MW, *et al* Utilizing time-driven activity-based costing to  
23 determine open radical cystectomy and ileal conduit surgical episode cost drivers. *Urologic*  
24 *Oncology: Seminars and Original Investigations* 2021;**39**:237.e1-237.e5.  
25 doi:10.1016/j.urolonc.2020.11.030  
26  
27 42 Mattar D, Di Filippo A, Invento A, *et al* Economic implications of ACOSOG Z0011 trial  
28 application into clinical practice at the European Institute of Oncology. *Eur J Surg Oncol*  
29 2021;**47**:2499–505. doi:10.1016/j.ejso.2021.06.016  
30  
31 43 Bueno H, Bernal JL, Jimenez-Jimenez V, *et al* The Clinical outcomes, healthcare resource  
32 utilization, and related costs (COHERENT) model. Application in heart failure patients. *Rev*  
33 *Esp Cardiol* Published Online First: 20 October 2021. doi:10.1016/j.rec.2021.08.009  
34  
35 44 Casey M, Perera D, Enticott J, *et al* High utilisers of emergency departments: the profile and  
36 journey of patients with mental health issues. *Int J Psychiatry Clin Pract* 2021;**25**:316–24.  
37 doi:10.1080/13651501.2021.1904998  
38  
39 45 Cohen RV, Nishikawa AM, Ribeiro RA, *et al* Surgical Management of Obesity in Brazil:  
40 Proposal for a Value-Based Healthcare Model and Preliminary Results. *Value in Health*  
41 *Regional Issues* 2021;**26**:10–4. doi:10.1016/j.vhri.2020.11.005  
42  
43 46 Negrini R, da Silva Ferreira RD, Guimaraes DZ. Value-based care in obstetrics: comparison  
44 between vaginal birth and caesarean section. *BMC Pregnancy Childbirth* 2021;**21**:333.  
45 doi:10.1186/s12884-021-03798-2  
46  
47 47 Fernando-Canavan L, Gust A, Hsueh A, *et al* Measuring the economic impact of hospital-  
48 acquired complications on an acute health service. *Aust Health Rev* 2021;**45**:135–42.  
49 doi:10.1071/AH20126  
50  
51  
52  
53  
54  
55  
56  
57  
58  
59  
60



- 1  
2  
3 48 Khanijow AN, Wood LN, Xie R, *et al* The impact of an enhanced recovery program (ERP)  
4 on the costs of colorectal surgery. *Am J Surg* 2021;**222**:186–92.  
5 doi:10.1016/j.amjsurg.2020.11.034  
6  
7  
8 49 Vanni F, Foglia E, Pennestrì F, *et al* Introducing enhanced recovery after surgery in a high-  
9 volume orthopaedic hospital: a health technology assessment. *BMC Health Serv Res*  
10 2020;**20**:773. doi:10.1186/s12913-020-05634-3  
11  
12 50 Jacobs K, Dewilde T, Vandoren C, *et al* Variability in hospital costs of Adult Spinal  
13 Deformity care. *Spine* 2020;**45**:1221–8. doi:10.1097/BRS.0000000000003497  
14  
15 51 Ning MS, Venkatesan AM, Stafford RJ, *et al* Developing an intraoperative 3T MRI-guided  
16 brachytherapy program within a diagnostic imaging suite: Methods, process workflow, and  
17 value-based analysis. *Brachytherapy* 2020;**19**:427–37. doi:10.1016/j.brachy.2019.09.010  
18  
19 52 Caloway C, Yamasaki A, Callans KM, *et al* Quantifying the benefits from a care coordination  
20 program for tracheostomy placement in neonates. *Int J Pediatr Otorhinolaryngol* 2020;**134**.  
21 doi:10.1016/j.ijporl.2020.110025  
22  
23 53 Burnhope E, Waring M, Guilder A, *et al* A systematic approach towards implementing value-  
24 based health care in heart failure: Understandings from retrospective analysis methods in  
25 South London. *Health Serv Manage Res* Published Online First: 2020.  
26 doi:10.1177/0951484820971442  
27  
28 54 Lenfant L, Sawczyn G, Kim S, *et al* Single-institution Cost Comparison: Single-port Versus  
29 Multiport Robotic Prostatectomy. *European Urology Focus* Published Online First: 2020.  
30 doi:10.1016/j.euf.2020.06.010  
31  
32 55 Hernandez A, Kaplan RS, Witkowski ML, *et al* Navy Medicine Introduces Value-Based  
33 Health Care. *Health Aff* 2019;**38**:1393–400. doi:10.1377/hlthaff.2019.00280  
34  
35 56 Basto J, Chahal R, Riedel B. Time-driven activity-based costing to model the utility of parallel  
36 induction redesign in high-turnover operating lists. *Healthc Pap* 2019;**7**.  
37 doi:10.1016/j.hjdsi.2019.01.003  
38  
39 57 McCreary DL, Dugarte AJ, Vang S, *et al* Patient-Level Value Analysis: An Innovative  
40 Approach to Optimize Care Delivery. *J Orthop Trauma* 2019;**33**:S49–52.  
41 doi:10.1097/BOT.0000000000001624  
42  
43 58 Ahluwalia R, Vainieri E, Tam J, *et al* Surgical Diabetic Foot Debridement: Improving  
44 Training and Practice Utilizing the Traffic Light Principle. *Int J Low Extrem Wounds*  
45 2019;**18**:279–86. doi:10.1177/1534734619853657  
46  
47 59 Kurt P, Saban M, Cankaya F, *et al* Time-Driven Activity-Based Costing in the Ophthalmology  
48 Department of State Hospital: a Case Study. *Fresenius Environ Bull* 2019;**28**:2754–70.  
49  
50 60 Danilyants N, MacKoul P, van der Does L, *et al* A value-based evaluation of minimally  
51 invasive hysterectomy approaches. *Gynecol Surg* 2019;**16**:5. doi:10.1186/s10397-019-1057-  
52 9  
53  
54  
55  
56  
57  
58  
59  
60

- 1  
2  
3 61 Danilyants N, MacKoul P, Baxi R, *et al* Value-based assessment of hysterectomy approaches. *J Obstet Gynaecol Res* 2019;**45**:389–98. doi:10.1111/jog.13853  
4  
5  
6  
7 62 Chatfield SC, Volpicelli FM, Adler NM, *et al* Bending the cost curve: Time series analysis of  
8 a value transformation programme at an academic medical centre. *BMJ Qual Saf*  
9 2019;**28**:449–58. doi:10.1136/bmjqs-2018-009068  
10  
11 63 Featherall J, Brigati DP, Arney AN, *et al* Effects of a Total Knee Arthroplasty Care Pathway  
12 on Cost, Quality, and Patient Experience: Toward Measuring the Triple Aim. *J Arthroplasty*  
13 2019;**34**:2561–8. doi:10.1016/j.arth.2019.06.011  
14  
15 64 Robinson JR, Carter NH, Gibson C, *et al* Improving the value of care for appendectomy  
16 through an individual surgeon-specific approach. *J Pediatr Surg* 2018;**53**:1181–  
17 6. <https://www.ncbi.nlm.nih.gov/pmc/articles/PMC5994354/pdf/nihms949182.pdf>  
18  
19 65 Karns MR, Jones DL, Todd DC, *et al* Patient- and Procedure-Specific Variables Driving Total  
20 Direct Costs of Outpatient Anterior Cruciate Ligament Reconstruction. *Orthop J Sports Med*  
21 2018;**6**:2325967118788543. doi:10.1177/2325967118788543  
22  
23 66 Yu YR, Abbas PI, Smith CM, *et al* Time-driven activity-based costing: A dynamic value  
24 assessment model in pediatric appendicitis. *J Pediatr Surg* 2017;**52**:1045–9.  
25 doi:10.1016/j.jpedsurg.2017.03.032  
26  
27 67 Parra E, Arenas MD, Alonso M, *et al* Assessing value-based health care delivery for  
28 haemodialysis. *J Eval Clin Pract* 2017;**23**:477–85. doi:10.1111/jep.12483  
29  
30 68 Kaplan AL, Agarwal N, Setlur NP, *et al* Measuring the cost of care in benign prostatic  
31 hyperplasia using time-driven activity-based costing (TDABC). *Healthcare*. 2015;**3**:43–8.  
32 doi:10.1016/j.hjdsi.2014.09.007  
33  
34 69 McLaughlin N, Martin NA, Upadhyaya P, *et al* Assessing the cost of contemporary pituitary  
35 care. *Neurosurg Focus* 2014;**37**:E7. doi:10.3171/2014.8.FOCUS14445  
36  
37 70 Abbott MM, Meara JG. A microcosting approach for isolated, unilateral cleft lip care in the  
38 first year of life. *Plast Reconstr Surg* 2011;**127**:333–9. doi:10.1097/PRS.0b013e3181f95af3  
39  
40 71 McLaughlin N, Burke MA, Setlur NP, *et al* Time-driven activity-based costing: a driver for  
41 provider engagement in costing activities and redesign initiatives. *Neurosurg Focus*  
42 2014;**37**:E3. doi:10.3171/2014.8.FOCUS14381  
43  
44 72 Steinmann G, Delnoij D, van de Bovenkamp H, *et al* Expert consensus on moving towards a  
45 value-based healthcare system in the Netherlands: a Delphi study. *BMJ Open*  
46 2021;**11**:e043367. doi:10.1136/bmjopen-2020-043367  
47  
48 73 Hoozée S, Bruggeman W. Identifying operational improvements during the design process of  
49 a time-driven ABC system: The role of collective worker participation and leadership style.  
50 *Manag Acc Res* 2010;**21**:185–98. doi:10.1016/j.mar.2010.01.003  
51  
52  
53  
54  
55  
56  
57  
58  
59  
60

1  
2  
3  
4  
5  
6  
7  
8  
9  
10  
11  
12  
13  
14  
15  
16  
17  
18  
19  
20  
21  
22  
23  
24  
25  
26  
27  
28  
29  
30  
31  
32  
33  
34  
35  
36  
37  
38  
39  
40  
41  
42  
43  
44  
45  
46  
47  
48  
49  
50  
51  
52  
53  
54  
55  
56  
57  
58  
59  
60

For peer review only

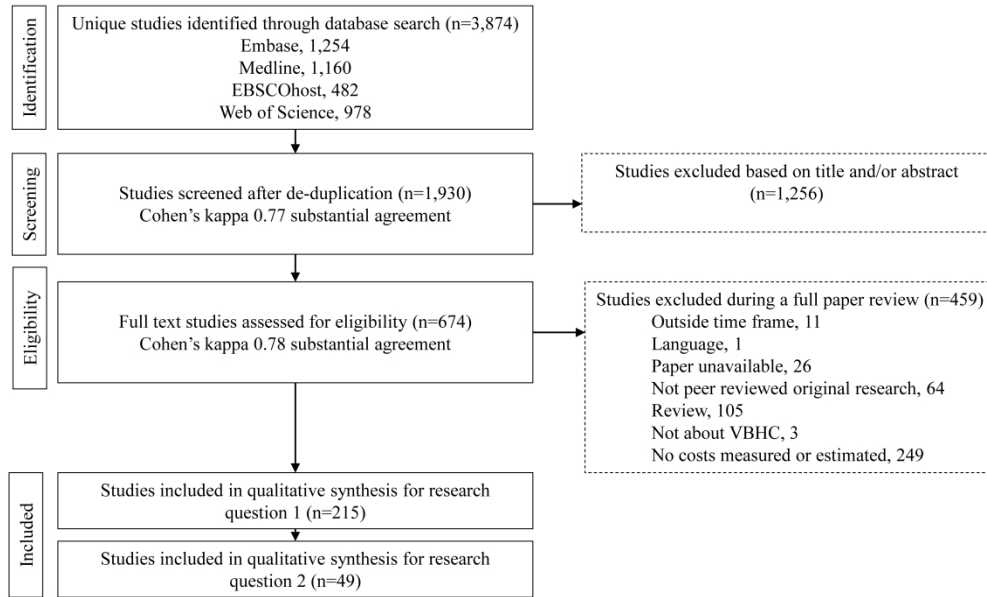

PRISMA flowchart depicting screening, exclusion, and inclusion process with 2 reviewers.

1428x873mm (96 x 96 DPI)

## Inclusions RQ1 (215) extracted data to be shared with Erasmus Data Repository (FigShare)

| Authors                                                                                                                              | Year Pub | Title paper (see full reference in manuscript)                                                                                                   | Geography (country) of study | Geography, state of country, if N/A country | study design (if incl. in RQ2)                                   | unit of analysis                                                                            | disease/topic labels provided by study (overlapping tags, can be multiple)                      | Medical Specialty (non overlapping labels) | Medical Specialty sub category, where applicable | Care path studied                         | Costs included      | Costs perspective (all) | Primary Cost perspective | Secondary Cost perspective if applicable | Costing method used as described in study                     | Primary Costing method classification    | Secondary Costing method classification, if applicable | Implementation of costing method (N/A if reimbursements or charges, unspecified if not discussed in study) | if reimbursement: actual measurement used for estimation | RQ2 included - discuss consequences or impact of cost information in study |
|--------------------------------------------------------------------------------------------------------------------------------------|----------|--------------------------------------------------------------------------------------------------------------------------------------------------|------------------------------|---------------------------------------------|------------------------------------------------------------------|---------------------------------------------------------------------------------------------|-------------------------------------------------------------------------------------------------|--------------------------------------------|--------------------------------------------------|-------------------------------------------|---------------------|-------------------------|--------------------------|------------------------------------------|---------------------------------------------------------------|------------------------------------------|--------------------------------------------------------|------------------------------------------------------------------------------------------------------------|----------------------------------------------------------|----------------------------------------------------------------------------|
| Gálvez, A. C. M.<br>Sánchez, F. J.<br>Moreno, C. A.<br>Pérez Fernández, A. J.<br>García, R. B.<br>López, M. C.<br>González, M. D. P. | 2020     | Value-based healthcare in ostomies                                                                                                               | Andalusia                    | Andalusia                                   |                                                                  | 71 surgical ostomy patients                                                                 | digestive, urology, surgical                                                                    | Urology                                    |                                                  | partial care path (full surgical episode) | Direct and indirect | provider                | provider                 |                                          | unspecified                                                   | Absorption costing - unspecified/generic |                                                        | Paper only                                                                                                 |                                                          | no                                                                         |
| McLaughlin, N.<br>Upadhyaya, P.<br>Busey, F.<br>Martin, N. A.                                                                        | 2014     | Value-based neurosurgery: Measuring and reducing the cost of microvascular decompression surgery                                                 | US                           | US: California                              | single center, retrospective                                     | 44 neurosurgical patients                                                                   | neurosurgical, microvascular decompression, trigeminal neuralgia (TN) or hemifacial spasm (HFS) | Surgical                                   | Neurosurgery                                     | partial care path (full surgical episode) | Direct and indirect | provider                | provider                 |                                          | ABC                                                           | Absorption costing - ABC                 |                                                        | implemented                                                                                                |                                                          | yes see second sheet                                                       |
| Hennink, S. D.<br>Hofland, N.<br>Gopic, J. P.<br>Van Der Kaa, C.<br>De Koning, K.<br>Nielsen, M.<br>Tone, C.                         | 2016     | Value-based healthcare in Lynch syndrome                                                                                                         | The Netherlands              | The Netherlands                             |                                                                  | 64 Lynch Syndrome patients                                                                  | oncology, lynch syndrome, colorectal cancer                                                     | Oncology                                   |                                                  | full care path                            | Direct and indirect | provider                | provider                 |                                          | unspecified                                                   | Absorption costing - unspecified/generic |                                                        | unspecified                                                                                                |                                                          | no                                                                         |
| French, K. E.<br>Guzman, A. B.<br>Rubio, A. C.<br>Frenzel, J. C.<br>Feeley, T. W.                                                    | 2016     | Value based care and bundled payments: Anesthesia care costs for outpatient oncology surgery using time-driven activity-based costing            | US                           | US: Virginia                                | single center, retrospective, multiple care paths                | 5,357 outpatient anesthesia cases across 11 procedure groups                                | oncology                                                                                        | Oncology                                   |                                                  | partial care path (full surgical episode) | Direct and indirect | provider                | provider                 |                                          | TDABC                                                         | Absorption costing - TDABC               |                                                        | implemented                                                                                                |                                                          | yes see second sheet                                                       |
| Tan, R. Y. C.<br>Met-Domestici, M.<br>Zhou, K.<br>Guzman, A. B.<br>Lim, S. T.<br>Soo, K. C.<br>Feeley, T. W.                         | 2016     | Using quality improvement methods and time-driven activity-based costing to improve value-based cancer care delivery at a Cancer Genetics clinic | Singapore                    | Singapore                                   | single center, retrospective, process mapping, observation       | 251 Patients with high-risk features suggestive of hereditary cancer                        | oncology, genetics, Cancer genetics                                                             | Oncology                                   |                                                  | partial care path                         | Direct              | provider                | provider                 |                                          | TDABC                                                         | Direct costing                           |                                                        | unspecified                                                                                                |                                                          | no                                                                         |
| Daniylants, N.<br>MacKoul, P.<br>Baxi, R.<br>van der Does, L. Q.<br>Haworth, L. R.                                                   | 2019     | Value-based assessment of hysterectomy approaches                                                                                                | US                           | US: Maryland                                | single center, retrospective                                     | 2689 patients, female, 18 or over                                                           | gynecology, vaginal hysterectomy, robot, robot-assisted                                         | gynecology & obstetrics                    |                                                  | partial care path (full surgical episode) | Direct and indirect | provider                | provider                 |                                          | Microcosting supplemented with charges                        | Absorption costing - unspecified/generic |                                                        | Paper only                                                                                                 |                                                          | yes see second sheet                                                       |
| Hernandez, A.<br>Kaplan, R. S.<br>Wikowski, M. L.<br>Forrest Faison, C.<br>Porter, M. E.                                             | 2019     | Navy medicine introduces value-based health care                                                                                                 | US                           | US: Florida                                 | single center, retrospective, multiple care paths, pilot project | 22877 patients total                                                                        | pregnancy, osteoarthritis, diabetes, lower back pain, multiple                                  | gynecology & obstetrics                    |                                                  | full care path                            | Direct and indirect | provider                | provider                 |                                          | TDABC                                                         | Absorption costing - TDABC               |                                                        | implemented                                                                                                |                                                          | yes see second sheet                                                       |
| Parra, E.<br>Arenas, M. D.<br>Alonso, M.<br>Martínez, M. F.<br>Gamen, A.<br>Aguarón, J.<br>Escobedo, M. T.                           | 2017     | Assessing value-based health care delivery for haemodialysis                                                                                     | Spain                        | Spain                                       | multi center, retrospective                                      | 5 haemodialysis treatment centers, patients unspecified                                     | haemodialysis, renal                                                                            | Urology                                    |                                                  | partial care path                         | Direct and indirect | provider                | provider                 |                                          | Microcosting                                                  | Absorption costing - unspecified/generic |                                                        | Paper only                                                                                                 |                                                          | yes see second sheet                                                       |
| Brown, G. C.<br>Brown, M. M.<br>Brown, H. C.<br>Kindermann, S.<br>Sharna, S.                                                         | 2007     | A Value-Based Medicine Comparison of Interventions for Subfoveal Neovascular Macular Degeneration                                                | US                           | US: Pennsylvania                            |                                                                  | 233 patients with age-related macular degeneration                                          | Ophthalmology, Neovascular, macular degeneration                                                | ophthalmology                              |                                                  | partial care path                         | Direct              | payer                   | payer                    |                                          | none, reimbursements                                          | Charges/Reimbursements-based             |                                                        | N/A                                                                                                        | average medicare reimbursements                          | no                                                                         |
| Medbery, R. L.<br>Chadd, T. S.<br>Sweeney, J. F.<br>Knechtle, S. J.<br>Kooby, D. A.<br>Maribel, S. K.<br>Lau, J.                     | 2014     | Laparoscopic vs open right hepatectomy: A value-based analysis                                                                                   | US                           | US: Georgia                                 |                                                                  | 105 patients total, elective laparoscopic liver resection surgery or open right hepatectomy | Surgical, Hepatectomy, Laparoscopic liver resections                                            | Surgical                                   | Liver                                            | partial care path                         | Direct and indirect | provider                | provider                 |                                          | unspecified, Hospital accounting data not otherwise specified | Absorption costing - unspecified/generic |                                                        | implemented                                                                                                |                                                          | no                                                                         |
| Daniylants, N.<br>MacKoul, P.<br>van der Does, L.<br>Haworth, L.<br>Baxi, R.                                                         | 2019     | A value-based evaluation of minimally invasive hysterectomy approaches                                                                           | US                           | US: Maryland                                | single center, retrospective                                     | 2689 patients, female, 18 or over                                                           | gynecology, vaginal hysterectomy, robot, robot-assisted                                         | gynecology & obstetrics                    |                                                  | partial care path (full surgical episode) | Direct and indirect | provider                | provider                 |                                          | Microcosting                                                  | Absorption costing - unspecified/generic |                                                        | Paper only                                                                                                 |                                                          | yes see second sheet                                                       |
| Gabriel, L.<br>Casey, J.<br>Gee, M.<br>Palmer, C.<br>Sinha, J.<br>Moxham, J.<br>Gardner, T. J.<br>Van Deen, W. K.                    | 2019     | Value-based healthcare analysis of joint replacement surgery for patients with primary hip osteoarthritis                                        | UK                           | UK: London                                  |                                                                  | 50 patients primary hip osteoarthritis                                                      | orthopedics, joint replacement, total hip osteoarthritis                                        | Surgical                                   | Orthopedic, arthroplasty                         | full care path                            | Direct and indirect | provider                | provider                 |                                          | Patient Level Information Costing System methodology (PLICS)  | Absorption costing - unspecified/generic |                                                        | implemented                                                                                                |                                                          | no                                                                         |
| Spiro, A.<br>Burak Ozbay, A.<br>Skop, M.<br>Centeno, A.<br>Duran, N. E.<br>Lopez, D. N.                                              | 2017     | The impact of value-based healthcare for inflammatory bowel diseases on healthcare utilization: A pilot study                                    | US                           | US: California                              |                                                                  | 60 patients with inflammatory bowel disease                                                 | IBS, bowel, Inflammatory bowel disease                                                          | Internal Medicine                          |                                                  | full care path                            | Direct and indirect | payer                   | payer                    |                                          | none, reimbursements                                          | Charges/Reimbursements-based             |                                                        | N/A                                                                                                        | Medicare reimbursements based on DRG/HCPCS codes         | no                                                                         |

|    |                                                                                                                                                   |      |                 |                  |                                                                |                                                                                                                                                                                           |                                                                                                       |               |                        |                                      |                     |          |                                                                           |                                                                           |                                             |                                         |                         |
|----|---------------------------------------------------------------------------------------------------------------------------------------------------|------|-----------------|------------------|----------------------------------------------------------------|-------------------------------------------------------------------------------------------------------------------------------------------------------------------------------------------|-------------------------------------------------------------------------------------------------------|---------------|------------------------|--------------------------------------|---------------------|----------|---------------------------------------------------------------------------|---------------------------------------------------------------------------|---------------------------------------------|-----------------------------------------|-------------------------|
| 1  | Isaacson, D.<br>Ahmad, T.<br>Mertzler, I.<br>Tjou, D. T.<br>Taguchi, K.<br>Usawachintachit, M.<br>Zaboniar, K.<br>Zhanov, M. V.<br>Zhukova, O. V. | 2017 | US              | US, California   | single center,<br>direct<br>observation,<br>process<br>mapping | 10 Uteroscopes                                                                                                                                                                            | Urology,<br>Ureterorenoscopy                                                                          | Urology       | partial care path      | Direct and indirect                  | provider            | provider | TDABC                                                                     | Absorption costing -<br>TDABC                                             | Paper only                                  | yes see second<br>sheet                 |                         |
| 2  | Yudina, Y. S.<br>Avdonina, N. G.<br>Emelyanov, I. V.<br>Kurapchev, D. I.<br>Zasosin, A. E.                                                        | 2020 | Russia          | Russia           |                                                                | 240 hypertensive<br>patients                                                                                                                                                              | Blood pressure,<br>hypertension, Blood<br>pressure telemonitoring<br>and remote counselling<br>(BPTM) | Cardiology    | partial care path      | Direct and indirect                  | provider            | provider | unspecified                                                               | Absorption costing -<br>unspecified/generic                               | unspecified                                 | no                                      |                         |
| 3  | Annabathula, R.<br>Dugan, A.<br>Bhalla, V.<br>Davis, G. A.<br>Smyth, S. S.<br>Gupta, V. A.                                                        | 2020 | US              | US, Kentucky     |                                                                | 634 patients, 18 or<br>over, acute<br>Pulmonary<br>Embolism                                                                                                                               | Cardiology, pulmonary<br>embolism                                                                     | Cardiology    | unspecified            | Direct and indirect                  | payer               | payer    | none,<br>reimbursements                                                   | Charges/Reimbursemen<br>t-based                                           | N/A                                         | total<br>reimbursements<br>no           |                         |
| 4  | Goretti, G.<br>Marinari, G. M.<br>Vanni, E.<br>Ferrari, C.                                                                                        | 2020 | Italy           | Italy            |                                                                | 2122 patients,<br>morbidly obese,<br>bariatric surgery                                                                                                                                    | Obesity, surgical,<br>bariatric surgery, Morbid<br>Obesity                                            | Surgical      | Bariatric              | unspecified                          | Direct and indirect | provider | provider                                                                  | Absorption costing -<br>unspecified/generic                               | Paper only                                  | no                                      |                         |
| 5  | Konda, S. R.<br>Lott, A.<br>Egol, K. A.                                                                                                           | 2020 | US              | US, New York     |                                                                | 361 operative hip<br>fracture patients                                                                                                                                                    | Geriatrics, trauma, hip<br>fracture                                                                   | Surgical      | Orthopedic<br>fracture | partial care path                    | Direct and indirect | provider | provider                                                                  | unspecified,<br>Hospital<br>accounting data<br>not otherwise<br>specified | Absorption costing -<br>unspecified/generic | implemented                             | no                      |
| 6  | Emis, R. D.<br>Parikh, A. B.<br>Sanderson, M.<br>Liu, M.<br>Isola, L.                                                                             | 2019 | US              | US, New York     |                                                                | 210 patients, 377<br>episodes of care                                                                                                                                                     | Oncology, Hematology,<br>prostate cancer                                                              | Oncology      | full care path         | Direct and indirect                  | payer               | payer    | none,<br>reimbursements                                                   | Charges/Reimbursemen<br>t-based                                           | N/A                                         | reimbursements<br>no                    |                         |
| 7  | Denneny, J. C.<br>Cyr, D. D.<br>Witsell, D. L.<br>Bretton, J.<br>Schulz, K.                                                                       | 2019 | US              | US, Maryland     |                                                                | 7499183 patients,<br>18-64, acute<br>rhinosinitis                                                                                                                                         | Rhinosinitis, Typical<br>chronic rhinosinitis                                                         | Surgical      | ENT                    | partial care path                    | Direct and indirect | payer    | payer                                                                     | none,<br>reimbursements                                                   | Charges/Reimbursemen<br>t-based             | N/A                                     | claims<br>no            |
| 8  | Peele, P.<br>Keyser, D.<br>Lovelace, J.<br>Moss, D.                                                                                               | 2018 | US              | US, Pennsylvania |                                                                | 262 child patients,<br>under 21.                                                                                                                                                          | Pediatrics, complex<br>conditions                                                                     | Pediatrics    | Pediatric other        | partial care path                    | Direct and indirect | payer    | payer                                                                     | none,<br>reimbursements                                                   | Charges/Reimbursemen<br>t-based             | N/A                                     | reimbursements<br>no    |
| 9  | Brown, M. M.<br>Brown, G. C.<br>Brown, H. C.<br>Pect, J.                                                                                          | 2008 | US              | US, Pennsylvania |                                                                | 716 patients, classic<br>or neovascular<br>macular<br>degeneration<br>158 patients<br>undergoing<br>implantable<br>Cardioverter<br>Defibrillator (ICD)<br>or Cardiac<br>Resynchronization | Neovascular, macular<br>degeneration, Subfoveal<br>Neovascular Macular<br>Degeneration                | ophthalmology | partial care path      | Direct and indirect                  | payer               | payer    | none,<br>reimbursements                                                   | Charges/Reimbursemen<br>t-based                                           | N/A                                         | reimbursements<br>no                    |                         |
| 10 | Burnhope, E.<br>Waring, M.<br>Guilider, A.<br>Malhotra, B.<br>Cardoso, J. M.<br>Razavi, R.<br>Czuchra, J.                                         | 2020 | UK              | UK, London       |                                                                | A systematic approach towards implementing value-based health care in heart failure: Understandings from retrospective analysis methods in South London                                   | Cardiology, heart failure                                                                             | Surgical      | Cardiac/Thoracic       | partial care path                    | Direct and indirect | provider | provider                                                                  | unspecified,<br>Hospital<br>accounting data<br>not otherwise<br>specified | Absorption costing -<br>unspecified/generic | implemented                             | yes see second<br>sheet |
| 11 | Khullar, O. V.<br>Jiang, R.<br>Furze, S. D.<br>Pickens, A.<br>Sanchetti, M. S.<br>Ward, K.<br>Zalbasas, T.                                        | 2015 | US              | US, Georgia      |                                                                | 942 patients<br>esophagectomy<br>967 patients<br>receiving primary<br>percutaneous<br>cutanary<br>intervention<br>between 2009 and<br>2011                                                | Oncology, esophageal<br>cancer                                                                        | Oncology      | full care path         | Direct and indirect                  | payer               | payer    | none,<br>reimbursements                                                   | Charges/Reimbursemen<br>t-based                                           | N/A                                         | Medicare costs,<br>reimbursements<br>no |                         |
| 12 | Eringer, J. E.<br>Strauss, C. E.<br>Garberich, R. R.<br>Bradley, S. M.<br>Rush, P.<br>Chavez, J. J.<br>Dobson, A. K.                              | 2018 | US              | US, Minnesota    |                                                                | Value-based ST-segment-elevation myocardial infarction care using risk-guided triage and early discharge                                                                                  | Cardiology, heart failure,<br>myocardial infarction                                                   | Surgical      | Cardiac/Thoracic       | full care path (surgical<br>episode) | Direct              | provider | provider                                                                  | unspecified,<br>Hospital<br>accounting data<br>not otherwise<br>specified | Unspecified                                 | implemented                             | no                      |
| 13 | Bodar, Y. J. L.<br>Srinivasan, A. K.<br>Shah, A. S.<br>Kawal, T.<br>Shukla, A. R.                                                                 | 2020 | US              | US, Pennsylvania | single center,<br>retrospective,<br>direct<br>observation      | 25 robot assisted<br>laparoscopic<br>pyeloplasties                                                                                                                                        | Pediatrics, urology,<br>robotics, robot                                                               | Pediatrics    | Pediatric surgical     | full care path (surgical<br>episode) | Direct and indirect | provider | provider                                                                  | TDABC                                                                     | Absorption costing -<br>TDABC               | Paper only                              | yes see second<br>sheet |
| 14 | Verberne, W. R.<br>Dijkers, J.<br>Kelder, J. C.<br>Geers, A. B. M.<br>Jellema, W. T.<br>Vincent, H. H.<br>Van Dalen, J. T. M.                     | 2018 | The Netherlands | The Netherlands  |                                                                | 366 patients aged<br>≥70 years with<br>advanced chronic<br>kidney disease                                                                                                                 | Nephrology, kidney,<br>dialysis, chronic                                                              | Nephrology    | full care path         | Direct and indirect                  | provider            | provider | unspecified,<br>Hospital<br>accounting data<br>not otherwise<br>specified | Absorption costing -<br>unspecified/generic                               | implemented                                 | no                                      |                         |

|                                                                                                                                                                                                                                                                                                                                                                                                                          |                                                                                                                                                                                                     |      |           |                    |                                                                                                                                                                   |                                                         |                                               |                          |                                              |                                           |                     |          |                                                       |                                         |                            |                                               |                      |
|--------------------------------------------------------------------------------------------------------------------------------------------------------------------------------------------------------------------------------------------------------------------------------------------------------------------------------------------------------------------------------------------------------------------------|-----------------------------------------------------------------------------------------------------------------------------------------------------------------------------------------------------|------|-----------|--------------------|-------------------------------------------------------------------------------------------------------------------------------------------------------------------|---------------------------------------------------------|-----------------------------------------------|--------------------------|----------------------------------------------|-------------------------------------------|---------------------|----------|-------------------------------------------------------|-----------------------------------------|----------------------------|-----------------------------------------------|----------------------|
| Gregory, D.<br>Scotti, D. J.<br>de Lissovoy, G.<br>Palacios, I.<br>Dixon, S.<br>Main, B.<br>Lokani, W.<br>Ravikumar, T. S.<br>Sharma, C.<br>Marini, C.<br>Steele, G. D.<br>Ritter, G.<br>Barrera, R.<br>Kuo, M.<br>Ning, M. S.<br>Venkatesan, A. M.<br>Stafford, R. J.<br>Bui, T. P.<br>Carlson, R.<br>Baillard, N. S.<br>Judson, S.<br>Sun, L. L.<br>Cao, D. Y.<br>Yang, J. X.<br>Bian, M. L.<br>Wei, L. H.<br>Shen, K. | A value-based analysis of hemodynamic support strategies for high-risk heart failure patients undergoing a percutaneous coronary intervention                                                       | 2013 | US        | US; various states | 427 patients enrolled in trial, mean age 68, 80.6% male                                                                                                           | Cardiology, heart failure                               | Surgical                                      | Cardiac/Thoracic         | partial care path                            | Direct and indirect                       | provider (proxy)    | payer    | none; charges, transformed with cost-to-charge ratio  | Charges/Reimbursement-based proxy       | N/A                        | none, charges, cost to charges                | no                   |
| Yoshida, S.<br>Sun, L. L.<br>Cao, D. Y.<br>Yang, J. X.<br>Bian, M. L.<br>Wei, L. H.<br>Shen, K.                                                                                                                                                                                                                                                                                                                          | A validated value-based model to improve hospital-wide perioperative outcomes: Adaptability to combined medical/surgical inpatient cohorts                                                          | 2010 | US        | US; New York       | >100,000 hospital admissions                                                                                                                                      | Surgical                                                | Surgical                                      | other                    | partial care path                            | Direct                                    | provider            | provider | direct variable costs as an estimation of total costs | Direct costing                          | Paper only                 |                                               | no                   |
| Fortmann, A. L.<br>Walker, C.<br>Barger, K.<br>Robacker, M.<br>Morrisey, R.<br>Orwine, K.<br>Lewandowski, J.<br>Ramirez, M. M.<br>Brennan, G. P.                                                                                                                                                                                                                                                                         | Developing an intraoperative 3T MRI-guided brachytherapy program within a diagnostic imaging suite: Methods, process workflow, and value-based analysis                                             | 2020 | US        | US; Texas          | single center, retrospective, direct observation, process mapping                                                                                                 | Oncology, Gynecology, gynecologic pelvic tumor          | Oncology                                      |                          | full care path (surgical episode)            | Direct and indirect                       | provider            | provider | TDABC                                                 | Absorption costing - TDABC              | Paper only                 |                                               | yes see second sheet |
| Fortmann, A. L.<br>Walker, C.<br>Barger, K.<br>Robacker, M.<br>Morrisey, R.<br>Orwine, K.<br>Lewandowski, J.<br>Ramirez, M. M.<br>Brennan, G. P.                                                                                                                                                                                                                                                                         | Value-based medicine analysis on loop electrocautery excision procedure and CO2 laser vaporization for the treatment of cervical intraepithelial neoplasia 2                                        | 2012 | China     | China              | 10 female patients<br>358 female patients, 18-65, colposcopic-histopathologically confirmed CIN2, intact uterus, no past history of cervical neoplasia, and had a | Obstetrics, Gynecology, cervical neoplasia              | gynecology & obstetrics                       |                          | partial care path                            | unspecified                               | provider            | provider | unspecified                                           | Unspecified                             | unspecified                |                                               | no                   |
| Fortmann, A. L.<br>Walker, C.<br>Barger, K.<br>Robacker, M.<br>Morrisey, R.<br>Orwine, K.<br>Lewandowski, J.<br>Ramirez, M. M.<br>Brennan, G. P.                                                                                                                                                                                                                                                                         | Care Team Integration in Primary Care Improves One-Year Clinical and Financial Outcomes in Diabetes: A Case for Value-Based Care                                                                    | 2020 | US        | US; California     | 236 treated patients, 239 usual care patients. All diagnosed with type 1 or 2 diabetes.                                                                           | Diabetes                                                | Internal Medicine                             |                          | partial care path                            | Direct                                    | provider            | provider | direct variable costs as an estimation of total costs | Direct costing                          | implemented                |                                               | no                   |
| Fortmann, A. L.<br>Walker, C.<br>Barger, K.<br>Robacker, M.<br>Morrisey, R.<br>Orwine, K.<br>Lewandowski, J.<br>Ramirez, M. M.<br>Brennan, G. P.                                                                                                                                                                                                                                                                         | Using the value-based care paradigm to compare physical therapy access to care models in cervical spine radiculopathy: a case report                                                                | 2020 | US        | US; Florida        | case study; 39 yo female                                                                                                                                          | Physiotherapy                                           | Neurology                                     |                          | partial care path                            | Direct and indirect                       | payer, patient      | payer    | patient                                               | Charges/Reimbursement-based patient OoO | N/A                        | cost to patient, reimbursement                | no                   |
| Ryan, S. P.<br>Plate, J. F.<br>Black, C. S.<br>Howell, C. B.<br>Jiranek, W. A.<br>Bolognesi, M. P.<br>Plate, J. F.<br>Ryan, S. P.<br>Black, C. S.<br>Howell, C. B.<br>Jiranek, W. A.<br>Bolognesi, M. P.<br>Scotti, D. J.<br>Abbott, M. M.<br>Meara, J. G.                                                                                                                                                               | Value-Based Care Has Not Resulted in Biased Patient Selection: Analysis of a Single Center's Experience in the Care for Joint Replacement Bundle                                                    | 2019 | US        | US; North Carolina | 1248 total knee arthroplasty patients,                                                                                                                            | orthopedics, joint replacement, total knee arthroplasty | Surgical                                      | Orthopedic, arthroplasty | full care path                               | Direct                                    | provider            | provider | direct variable costs as an estimation of total costs | Direct costing                          | implemented                |                                               | no                   |
| Ryan, S. P.<br>Plate, J. F.<br>Black, C. S.<br>Howell, C. B.<br>Jiranek, W. A.<br>Bolognesi, M. P.<br>Scotti, D. J.<br>Abbott, M. M.<br>Meara, J. G.                                                                                                                                                                                                                                                                     | No Changes in Patient Selection and Value-Based Metrics for Total Hip Arthroplasty After Comprehensive Care for Joint Replacement Bundle Implementation at a Single Center                          | 2019 | US        | US; North Carolina | 751 total hip arthroplasty patients,                                                                                                                              | orthopedics, joint replacement, total hip arthroplasty  | Surgical                                      | Orthopedic, arthroplasty | full care path                               | Direct                                    | provider            | provider | direct variable costs as an estimation of total costs | Direct costing                          | implemented                |                                               | no                   |
| Ryan, S. P.<br>Plate, J. F.<br>Black, C. S.<br>Howell, C. B.<br>Jiranek, W. A.<br>Bolognesi, M. P.<br>Scotti, D. J.<br>Abbott, M. M.<br>Meara, J. G.                                                                                                                                                                                                                                                                     | A microcosting approach for isolated, unilateral cleft lip care in the first year of life                                                                                                           | 2011 | US        | US; Massachusetts  | single center, retrospective                                                                                                                                      | 12 children, cleft lip repair                           | Pediatrics, cleft palate, plastic surgery     | Pediatrics               | Pediatric Plastic surgery                    | partial care path (full surgical episode) | Direct and indirect | provider | provider                                              | Microcosting                            | Absorption costing - ABC   | Paper only                                    | yes see second sheet |
| Regan, D. K.<br>Manoli, A.<br>Hutzler, L.<br>Konda, S. R.<br>Egol, K. A.                                                                                                                                                                                                                                                                                                                                                 | Impact of Diabetes Mellitus on Surgical Quality Measures After Ankle Fracture Surgery: Implications for "Value-Based" Compensation and "Pay for Performance"                                        | 2015 | US        | US; New York       | 58,748 patients, 7501 with Diabetes Mellitus                                                                                                                      | Diabetes                                                | Internal Medicine                             |                          | unspecified                                  | Direct and indirect                       | payer               | payer    | none, reimbursements                                  | Charges/Reimbursement-based             | N/A                        | mean total hospital charges                   | no                   |
| Yu, Y. R.<br>Abbas, P. I.<br>Smith, C. M.<br>Carberry, K. E.<br>Ren, H.<br>Patel, B.<br>Steinbock, J. G.<br>Rice-Townsend, S.<br>Barnes, J. N.<br>Hall, M.<br>Baxter, J. L.<br>Rangel, S. J.                                                                                                                                                                                                                             | Time-driven activity-based costing: A dynamic value assessment model in pediatric appendicitis                                                                                                      | 2017 | US        | US; Texas          | single center, retrospective, direct observation, process mapping                                                                                                 | 207 patients total, 6 simple appendicitis               | Pediatrics, appendicitis                      | Pediatrics               | Pediatric appendicitis                       | full care path (surgical episode)         | Direct and indirect | provider | provider                                              | TDABC                                   | Absorption costing - TDABC | Paper only                                    | yes see second sheet |
| Ahluwalia, R.<br>Cook, J.<br>Raheman, F.<br>Karupppiah, K.<br>Colegate-Stone, T.<br>Tavakolizadeh, A.<br>Kasambasa, M.<br>Basto, J. Chahal, R.<br>Riedel, B.                                                                                                                                                                                                                                                             | Variation in practice and resource utilization associated with the diagnosis and management of appendicitis at freestanding children's hospitals: Implications for value-based comparative analysis | 2014 | US        | US; Massachusetts  | 13,328 patients, 34 children's hospitals, 25 states in US, acute appendicitis, age 3-18                                                                           | Pediatrics, appendicitis                                | Pediatrics                                    | Pediatric appendicitis   | unspecified                                  | Direct and indirect                       | payer               | payer    | none, reimbursements                                  | Charges/Reimbursement-based             | N/A                        | charges transformed with cost-to-charge ratio | no                   |
| Ahluwalia, R.<br>Cook, J.<br>Raheman, F.<br>Karupppiah, K.<br>Colegate-Stone, T.<br>Tavakolizadeh, A.<br>Kasambasa, M.<br>Basto, J. Chahal, R.<br>Riedel, B.                                                                                                                                                                                                                                                             | Improving the efficiency of ankle fracture care through home care and day-surgery units: Delivering safe surgery on a value-based healthcare model                                                  | 2020 | UK        | UK; London         | single center, prospective, process mapping                                                                                                                       | 53 trauma patients                                      | trauma, orthopedics, surgical, ankle fracture | Surgical                 | Orthopedic fracture                          | full care path (surgical episode)         | Direct and indirect | provider | provider                                              | TDABC                                   | Absorption costing - TDABC | Paper only                                    | yes see second sheet |
| Ahluwalia, R.<br>Cook, J.<br>Raheman, F.<br>Karupppiah, K.<br>Colegate-Stone, T.<br>Tavakolizadeh, A.<br>Kasambasa, M.<br>Basto, J. Chahal, R.<br>Riedel, B.                                                                                                                                                                                                                                                             | Time-driven activity-based costing to model the utility of parallel induction redesign in high-turnover operating lists                                                                             | 2019 | Australia | Australia          | single center, prospective, process mapping                                                                                                                       | 19 all-day surgery lists, patients unspecified          | melanoma, oncology                            | Oncology                 | partial care path (partial surgical episode) | Direct and indirect                       | provider            | provider | TDABC                                                 | Absorption costing - TDABC              | Paper only                 | yes see second sheet                          |                      |

|    |                                                                                                                                                                      |                                                                                                                |      |        |                    |                                              |                                                                                           |                                             |                     |                   |                                           |                     |          |                                |                                          |                                          |                                                 |                      |         |    |
|----|----------------------------------------------------------------------------------------------------------------------------------------------------------------------|----------------------------------------------------------------------------------------------------------------|------|--------|--------------------|----------------------------------------------|-------------------------------------------------------------------------------------------|---------------------------------------------|---------------------|-------------------|-------------------------------------------|---------------------|----------|--------------------------------|------------------------------------------|------------------------------------------|-------------------------------------------------|----------------------|---------|----|
| 1  | Kadakia, R. J., Ahearn, B.M., Tenenbaum, S., Bariteau, J.T.                                                                                                          | Costs Associated With Geriatric Ankle Fractures, Operative Versus Nonoperative Management                      | 2017 | US     | US, Georgia        | 19648 ankle fracture patients                | trauma, orthopedics, geriatrics, ankle fracture                                           | Surgical                                    | Orthopedic fracture | partial care path | Direct and indirect                       | payer               | payer    | none, reimbursements           | Charges/Reimbursements-based             | N/A                                      | medicare reimbursements                         | no                   |         |    |
| 2  | Barkley, R. S., Sosabauer, M. J., Wang, J., Blau, S., Page, R. D.                                                                                                    | Reducing Cancer Costs Through Symptom Management and Triage Pathways                                           | 2019 | US     | US, Florida        | 10417 ER Events, 1879 unique patients        | Emergency care, Acute care, Oncology                                                      | Oncology                                    |                     | partial care path | Direct and indirect                       | payer               | payer    | none, reimbursements           | Charges/Reimbursements-based             | N/A                                      | medicare claims                                 | no                   |         |    |
| 3  | McLaughlin, N., Martin, N. A., Upadhyaya, P., Bari, A. A., Buxey, F., Wang, M. B., Hersh, E. H., Yeager, K. A., Neifert, S. N., Kim, J., Dangayach, N. S., Weiss, N. | Assessing the cost of contemporary pituitary care                                                              | 2014 | US     | US, California     | single center, retrospective                 | 27 neurosurgical patients                                                                 | Neurosurgical, pituitary adenoma            | Surgical            | Neurosurgery      | partial care path (full surgical episode) | Direct and indirect | provider | provider                       | ABC                                      | Absorption costing - ABC                 | implemented                                     | yes see second sheet |         |    |
| 4  | Meara, J. G., Hughes, C. D., Sanchez, K., Catalozzo, L., Clark, R., Kummer, A. W.                                                                                    | Optimal Outcomes Reporting (OOR): A New Value-Based Metric for Outcome Reporting Following Cleft Palate Repair | 2020 | US     | US, Massachusetts  | Retrospective, single-center cohort analysis | 94 patients were identified who underwent primary cleft palate repair by the same surgeon | Cleft palate, Palatoplasty, plastic surgery | Surgical            | Plastic surgery   | full care path                            | Direct and indirect | provider | provider                       | Relative Value Units                     | Absorption costing - unspecified/generic | Paper only                                      | no                   |         |    |
| 5  | Jakovljevic, M., Zagic, A., Rankovic, A., Dugovic, A.                                                                                                                | Radiation therapy remains the key cost driver of oncology inpatient treatment                                  | 2015 | Serbia | Serbia             | 2544 complex oncology patients               |                                                                                           | Oncology                                    | Oncology            | partial care path | Direct                                    | provider            | provider | Microcosting direct costs only | Direct costing                           | unspecified                              | no                                              |                      |         |    |
| 6  | Sudan, R. S., He, W., Sun, C. C., Zhao, H., Rauh-Haim, J. A., Fleming, N. D., Lenzini, L., Sawczyn, G., Kim, S., Aminsharif, A., Kaouk, J.                           | Total and out-of-pocket costs of different primary management strategies in ovarian cancer                     | 2019 | US     | US, Texas          | 12761 patients                               | Gynecology, oncology, ovarian cancer                                                      | gynecology & obstetrics                     |                     | unspecified       | Direct and indirect                       | Payer, patient      | payer    | patient                        | none, reimbursements                     | Charges/Reimbursements-based             | Charges/Reimbursement-based patient OoO         | N/A                  | charges | no |
| 7  | Hemmila, M. R., Cain-Nielsen, A. H., Wahl, W. L., Vander Kolk, W. E., Jakubus, J. L., Mikhail, J. N., AlAbdur, A., Goktepe, M. E., Kilic, G. S., Borahay, M. A.      | Regional collaborative quality improvement for trauma reduces complications and costs                          | 2014 | US     | US, Texas          | 72084 episodes of acute trauma care          | Acute care                                                                                | emergency care & acute care                 |                     | partial care path | Direct and indirect                       | payer               | payer    | none, reimbursements           | Charges/Reimbursements-based             | N/A                                      | price-standardized payments, claims, DRG prices | no                   |         |    |
| 8  | Naghavi, A. O., Gonzalez, R. J., Scott, J. G., Kim, Y., Aboodeh, Y. A., Strom, T. J., Puvanesarajah, V., Kirby, D. J., Jain, A., Werner, B. C., Hassanzadeh, H.      | Staged reconstruction brachytherapy has lower overall cost in recurrent soft-tissue sarcoma                    | 2017 | US     | US, Florida        | 22 soft-tissue sarcoma patients              | Oncology, soft-tissue sarcoma                                                             | Oncology                                    |                     | full care path    | unspecified                               | payer               | payer    | none, charges                  | Charges/Reimbursements-based             | N/A                                      | charges                                         | no                   |         |    |
| 9  | Siu, A., Patel, J., Prentice, H. A., Cappuzzo, J. M., Hashemi, H., Mukherjee, D.                                                                                     | Cost Variation of Anterior Cervical Fusions in Elderly Medicare Beneficiaries                                  | 2017 | US     | US, unspecified    | 21,853 patients                              | orthopedics, geriatrics, elective anterior cervical fusions                               | Surgical                                    | Orthopedic fracture | unspecified       | Direct and indirect                       | payer               | payer    | none, reimbursements           | Charges/Reimbursements-based             | N/A                                      | reimbursements                                  | no                   |         |    |
| 10 | Kirsch, D. B., Yang, H., Maslow, A. L., Stolzenbach, M., McCall, A.                                                                                                  | Association of Positive Airway Pressure Use With Acute Care Utilization and Costs                              | 2019 | US     | US, North Carolina | 1098 patients                                | Sleep medicine, sleep apnea, Obstructive Sleep Apnea                                      | Internal Medicine                           |                     | partial care path | Direct and indirect                       | provider            | provider | unspecified                    | Absorption costing - unspecified/generic | implemented                              | no                                              |                      |         |    |



|    |                                                                                                                                            |      |                 |                    |                                              |                                                                                                                                               |                             |                                |                                           |                     |                  |          |                                                      |                                    |             |                                                |                      |
|----|--------------------------------------------------------------------------------------------------------------------------------------------|------|-----------------|--------------------|----------------------------------------------|-----------------------------------------------------------------------------------------------------------------------------------------------|-----------------------------|--------------------------------|-------------------------------------------|---------------------|------------------|----------|------------------------------------------------------|------------------------------------|-------------|------------------------------------------------|----------------------|
| 1  | Passias, P. G.<br>Poorman, G. W.<br>Bortz, C. A.<br>Qureshi, R.<br>Diebs, B. G.<br>Paul, J. C.<br>Lyon, S. D.                              | 2018 | US              | US, New York       | 2408 patients                                | orthopedic, surgical                                                                                                                          | Surgical                    | Spine                          | partial care path                         | unspecified         | payer            | payer    | none, reimbursements                                 | Charges/Reimbursements-based       | N/A         | reimbursements                                 | no                   |
| 2  | Monroe, G. R.<br>Frederix, G. W.<br>Savelberg, S. M. C.<br>De Vries, T. I.<br>Duran, K. J.<br>Van Der Smagt, J. J.<br>Lambert, B.          | 2016 | The Netherlands | The Netherlands    | 17 patients                                  | Genetics, Pediatrics, Intellectual disability                                                                                                 | Pediatrics                  | Pediatric other                | full care path                            | Direct              | provider         | provider | bottom-up clinical costing approach                  | Direct costing                     | implemented |                                                | no                   |
| 3  | Manriquez, E.<br>Mandelbaum, A.<br>Aguayo, E.<br>Zakbour, M.<br>Karlan, B.<br>Benharash, P.<br>Coban, T. G.                                | 2020 | US              | US, Virginia       | 21853 patients                               | Geriatrics, oncology, ovarian cancer, anterior cervical discectomy and fusion, anterior cervical fusion, cervical spine, cervical spondylosis | Oncology                    |                                | partial care path                         | Direct and indirect | payer            | payer    | none, reimbursements                                 | Charges/Reimbursements-based       | N/A         | reimbursement                                  | no                   |
| 4  | Wise, K.<br>Blaschke, B. L.<br>Parikh, H. R.<br>Gorman, T.<br>Casnovsky, I.<br>McMillan, L. J.<br>Einhorn, L.                              | 2020 | US              | US, Minnesota      | single center, retrospective<br>287 patients | orthopedics, geriatrics, hip fracture, surgical                                                                                               | Surgical                    | Orthopedic fracture            | partial care path (full surgical episode) | Direct and indirect | provider         | provider | ABC                                                  | Absorption costing - ABC           | implemented |                                                | yes see second sheet |
| 5  | Rocque, G. B.<br>Williams, C. P.<br>Jackson, B. E.<br>Ingram, S. A.<br>Halliava, K. I.<br>Pisu, M.<br>Kawachi, K. M.                       | 2018 | US              | US, Alabama        | 988 patients                                 | Geriatrics, oncology, De Novo Metastatic Breast Cancer                                                                                        | Oncology                    |                                | partial care path                         | Direct and indirect | payer            | payer    | none, reimbursements                                 | Charges/Reimbursements-based       | N/A         | reimbursement                                  | no                   |
| 6  | Schwartz, D. A.<br>Shah, A. A.<br>Zogg, C. K.<br>Nicholas, L. H.<br>Velopoulos, C. G.<br>Efron, D. T.<br>Schubert, E. D.                   | 2015 | US              | US, Massachusetts  | 191032 patient records                       | Surgical, acute care, acute cholecystitis, laparoscopic cholecystectomy                                                                       | Surgical                    | Gallbladder                    | unspecified                               | Direct and indirect | provider (proxy) | payer    | none; charges, transformed with cost-to-charge ratio | Charges/Reimbursements-based proxy | N/A         | charges, transformed with cost-to-charge ratio | no                   |
| 7  | Brixner, D.<br>Rubin, D. T.<br>Mease, P.<br>Mittal, M.<br>Liu, H.<br>Davis, M.<br>Cassiani, A.                                             | 2019 | US              | US, various states | 1134 patients                                | Multiple                                                                                                                                      | multiple                    |                                | unspecified                               | Direct and indirect | payer            | payer    | none; charges                                        | Charges/Reimbursements-based       | N/A         | charges                                        | no                   |
| 8  | Aguayo, E.<br>Sanaiba, Y.<br>Seo, Y. J.<br>Mardock, A.<br>Bailey, K.<br>Dobaria, V.<br>Kishore, S.<br>Cronin, K. J.                        | 2018 | US              | US, California     | 13943 patients                               | Cardiology, surgical, thrombocytopenia, Heparin-induced thrombocytopenia                                                                      | Surgical                    | Cardiac/Thoracic               | unspecified                               | Direct and indirect | payer            | payer    | none; charges, transformed with cost-to-charge ratio | Charges/Reimbursements-based proxy | N/A         | charges, transformed with cost-to-charge ratio | no                   |
| 9  | Mair, S. D.<br>Hawk, G. S.<br>Thompson, K. L.<br>Hettrich, C. M.<br>Jacobs, C. A.                                                          | 2020 | US              | US, Kentucky       | 170329 patients                              | orthopedic, surgical, depression, Rotator Cuff Repair                                                                                         | Surgical                    | Orthopedic rotator cuff repair | partial care path                         | Direct and indirect | payer            | payer    | none; charges                                        | Charges/Reimbursements-based       | N/A         | charges                                        | no                   |
| 10 | Alli, V. V.<br>Zhang, J.<br>Telem, D. A.                                                                                                   | 2018 | US              | US, Texas          | 14290 patients                               | Surgical, hernia, Incisional hernia                                                                                                           | Surgical                    | Abdominal                      | full care path                            | Direct and indirect | payer            | payer    | none; charges                                        | Charges/Reimbursements-based       | N/A         | charges                                        | no                   |
| 11 | Robles, A. J.<br>Komblioth, L. Z.<br>Hendrickson, C. M.<br>Howard, B. M.<br>Conroy, A. S.<br>Moazed, F.<br>Lafont, C. E.                   | 2018 | US              | US, California     | 1552 patients                                | Acute care, trauma care                                                                                                                       | emergency care & acute care |                                | unspecified                               | Direct and indirect | payer            | payer    | none; charges                                        | Charges/Reimbursements-based       | N/A         | charges                                        | no                   |
| 12 | van Dijk, J. T. J. M.<br>van Essen, T. A.<br>Dijkman, M. D.<br>Mostert, C. Q. B.<br>Polinder, S.<br>Peul, W. C.<br>de Raaij-Maclean, C. W. | 2019 | The Netherlands | The Netherlands    | 108 patients                                 | Acute care, brain injury, acute subdural hematoma, trauma care                                                                                | emergency care & acute care |                                | partial care path                         | Direct and indirect | provider         | provider | Absorption costing - reference pricing               | unspecified/generic                | Paper only  |                                                | no                   |
| 13 | Thakore, R. V.<br>Greenberg, S. E.<br>Shi, H.<br>Fox, A. M.<br>Francois, E. L.<br>Prabek, M. A.<br>Kosman, K.<br>Smith, B. D.              | 2015 | US              | US, Tennessee      | 78 patients                                  | orthopedic, surgical                                                                                                                          | Surgical                    | Orthopedic                     | unspecified                               | Direct and indirect | payer            | payer    | none; charges                                        | Charges/Reimbursements-based       | N/A         | charges                                        | no                   |
| 14 | Jiang, J.<br>Shih, Y. C.<br>Giordano, S. H.<br>Huo, J.<br>Jaggi, R.<br>Monosh, A. G.                                                       | 2017 | US              | US, Texas          | 105 211 female patients                      | Oncology, breast cancer                                                                                                                       | Oncology                    |                                | partial care path                         | Direct and indirect | payer            | payer    | none; charges                                        | Charges/Reimbursements-based       | N/A         | charges                                        | no                   |

|    |                                                                                                                                                                                                               |                                                                                                                                                                           |      |    |                    |                                                              |                                                                        |               |                                      |                                   |                     |                  |                      |                                                               |                                          |                      |                                                      |
|----|---------------------------------------------------------------------------------------------------------------------------------------------------------------------------------------------------------------|---------------------------------------------------------------------------------------------------------------------------------------------------------------------------|------|----|--------------------|--------------------------------------------------------------|------------------------------------------------------------------------|---------------|--------------------------------------|-----------------------------------|---------------------|------------------|----------------------|---------------------------------------------------------------|------------------------------------------|----------------------|------------------------------------------------------|
| 1  | Lentz, T. A.<br>Rhon, D. I.<br>George, S. Z.                                                                                                                                                                  | Predicting Opioid Use, Increased Health Care Utilization and High Costs for Musculoskeletal Pain: What Factors Mediate Pain Intensity and Disability?                     | 2020 | US | US, Washington     | 283 patients                                                 | Pain, Musculoskeletal Pain                                             | Pain medicine | partial care path                    | Direct and indirect               | provider            | provider         | unspecified          | Absorption costing - unspecified/generic                      | unspecified                              | no                   |                                                      |
| 2  | Kaul, S.<br>Korgenski, E. K.<br>Ying, J.<br>Ng, C. F.<br>Smits-Scoemann, R. R.<br>Nelson, R. E.<br>Arias-Solis, S.<br>Silva-Velazco, J.                                                                       | A retrospective analysis of treatment-related hospitalization costs of pediatric, adolescent, and young adult acute lymphoblastic leukemia                                | 2016 | US | US, Utah           | single center, retrospective<br>505 patients                 | Oncology, leukemia, acute lymphoblastic leukemia                       | Pediatrics    | Pediatric Oncology                   | partial care path                 | Direct and indirect | provider         | provider             | ABC                                                           | Absorption costing - ABC                 | implemented          | no                                                   |
| 3  | Dietz, D. W.<br>Stocchi, L.<br>Costello, M.<br>Gorgan, E.<br>Kalady, M. F.<br>Kessler, J.<br>Cunizares, M. F.<br>Feldman, L.<br>Miller, P. E.<br>Waters, P. M.<br>Bae, D. S.                                  | Considering Value in Rectal Cancer Surgery: An Analysis of Costs and Outcomes Based on the Open, Laparoscopic, and Robotic Approach for Proctectomy                       | 2017 | US | US, Ohio           | 488 patients                                                 | Oncology, rectal cancer                                                | Oncology      | partial care path (surgical episode) | Direct and indirect               | provider            | provider         | unspecified          | Absorption costing - unspecified/generic                      | unspecified                              | no                   |                                                      |
| 4  | Vuong, B.<br>Dehal, A.<br>Uppal, A.<br>Stern, S. L.<br>Mejia, J.<br>Weerasinghe, R.<br>Sanaia, Y.<br>Mantha, A.<br>Zaician, B.<br>Juo, Y. Y.<br>Shemin, R. J.<br>Benharash, P.                                | Complications and Cost of Syndactyly Reconstruction in the United States: Analysis of the Pediatric Health Information System                                             | 2017 | US | US, Massachusetts  | 38 hospitals, 2047 procedures                                | Pediatrics, orthopedic, surgical, Syndactyly Reconstruction            | Pediatrics    | Pediatric surgical                   | partial care path                 | Direct and indirect | provider (proxy) | payer                | none, charges, transformed with cost-to-charge ratio          | Charges/Reimbursements-based proxy       | N/A                  | charges transformed with cost-to-charge ratio<br>no  |
| 5  | Chatfield, S. C.<br>Volpicelli, F. M.<br>Adler, N. M.<br>Kim, K. L.<br>Jones, S. A.<br>Francois, F.<br>Chawla, S. S.<br>Whitson, A. J.<br>Schiffman, C. J.<br>Matsen, F. A.<br>Hsu, J. E.                     | What Are the Most Significant Cost and Value Drivers for Pancreatic Resection in an Integrated Healthcare System?                                                         | 2018 | US | US, California     | 796 patients                                                 | Surgical, Pancreas, Pancreatic Resection                               | Surgical      | Endocrine                            | partial care path                 | Direct and indirect | provider         | provider             | unspecified                                                   | Absorption costing - unspecified/generic | unspecified          | no                                                   |
| 6  | Charfield, S. C.<br>Volpicelli, F. M.<br>Adler, N. M.<br>Kim, K. L.<br>Jones, S. A.<br>Francois, F.<br>Chawla, S. S.<br>Whitson, A. J.<br>Schiffman, C. J.<br>Matsen, F. A.<br>Hsu, J. E.                     | Trends in Readmission and Costs After Transcatheter Implantation Versus Surgical Aortic Valve Replacement in Patients With Renal Dysfunction                              | 2020 | US | US, LA             | 350,609 isolated aortic valve replacements                   | Cardiology, Renal, Aortic Repair, Thoracic Endovascular Aortic Repair  | Surgical      | Cardiac/Thoracic                     | partial care path                 | Direct and indirect | provider (proxy) | payer                | none, charges, transformed with cost-to-charge ratio          | Charges/Reimbursements-based proxy       | N/A                  | charges transformed with cost-to-charge ratio<br>no  |
| 7  | Chatfield, S. C.<br>Volpicelli, F. M.<br>Adler, N. M.<br>Kim, K. L.<br>Jones, S. A.<br>Francois, F.<br>Chawla, S. S.<br>Whitson, A. J.<br>Schiffman, C. J.<br>Matsen, F. A.<br>Hsu, J. E.                     | Bending the cost curve: time series analysis of a value transformation programme at an academic medical centre                                                            | 2019 | US | US, New York       | single center, retrospective<br>74 projects, 160434 patients | Multiple                                                               | multiple      | partial care path                    | Direct                            | provider            | provider         | ABC                  | Direct costing                                                | implemented                              | yes see second sheet |                                                      |
| 8  | Klink, A. J.<br>Chmielowski, B.<br>Feinberg, B.<br>Ahsan, S.<br>Nero, D.<br>Liu, F. X.                                                                                                                        | Drivers of lower inpatient hospital costs and greater improvements in health-related quality of life for patients undergoing total shoulder and ream-and-run arthroplasty | 2020 | US | US, Washington     | 433 patients                                                 | orthopedics, athroplasty, total shoulder and ream-and-run arthroplasty | Surgical      | Orthopedic, arthroplasty             | unspecified                       | Direct and indirect | provider         | provider             | unspecified, Hospital accounting data not otherwise specified | Absorption costing - unspecified/generic | implemented          | no                                                   |
| 9  | Klink, A. J.<br>Chmielowski, B.<br>Feinberg, B.<br>Ahsan, S.<br>Nero, D.<br>Liu, F. X.                                                                                                                        | Health Care Resource Utilization and Costs in First-Line Treatments for Patients with Metastatic Melanoma in the United States                                            | 2019 | US | US, various states | 1599 patients                                                | Oncology, melanoma                                                     | Oncology      | unspecified                          | Direct and indirect               | payer               | payer            | none, reimbursements | Charges/Reimbursements-based                                  | N/A                                      | claims<br>no         |                                                      |
| 10 | Chotali, S.<br>Sivaganesan, A.<br>Parker, S. L.<br>Sielatycki, J. A.<br>McGirt, M. J.<br>Devlin, C. J.                                                                                                        | Drivers of Variability in 90-Day Cost for Elective Anterior Cervical Discectomy and Fusion for Cervical Degenerative Disease                                              | 2018 | US | US, Tennessee      | 445 patients                                                 | Spine, cervical degenerative disease                                   | Surgical      | Spine                                | partial care path                 | Direct and indirect | payer            | payer                | none, reimbursements                                          | Charges/Reimbursements-based             | N/A                  | reimbursements<br>no                                 |
| 11 | Sanaia, Y.<br>Kaviampour, B.<br>Downey, P.<br>Morchi, R.<br>Shemin, R. J.<br>Benharash, P.                                                                                                                    | National Study of Index and Readmission Mortality and Costs for Thoracic Endovascular Aortic Repair in Patients With Renal Disease                                        | 2020 | US | US, California     | 121046 patients                                              | Cardiology, Surgical, Aortic repair, Renal Disease                     | Surgical      | Cardiac/Thoracic                     | unspecified                       | Direct and indirect | provider (proxy) | payer                | none, charges, transformed with cost-to-charge ratio          | Charges/Reimbursements-based proxy       | N/A                  | charges, transformed with cost-to-charge ratio<br>no |
| 12 | Jain, N.<br>Brock, J. L.<br>Phillips, F. M.<br>Weaver, T.<br>Khan, S. N.                                                                                                                                      | Chronic preoperative opioid use is a risk factor for increased complications, resource use, and costs after cervical fusion                                               | 2018 | US | US, various states | 29101 patients                                               | Spine, cervical degenerative disease                                   | Surgical      | Spine                                | partial care path                 | Direct and indirect | payer            | payer                | none, reimbursements                                          | Charges/Reimbursements-based             | N/A                  | charges<br>no                                        |
| 13 | Featherall, J.<br>Brigati, D. P.<br>Atney, A. N.<br>Faour, M.<br>Bokar, D. V.<br>Murray, T. G.<br>Mullins, R. M.<br>Ackerman, R. S.<br>Hirschi, M.<br>Alford, B.<br>Evans, T.<br>Kiluk, J. V.<br>Patel, S. Y. | Effects of a Total Knee Arthroplasty Care Pathway on Cost, Quality, and Patient Experience: Toward Measuring the Triple Aim                                               | 2019 | US | US, Ohio           | 6760 surgeries                                               | orthopedics, total knee arthroplasty                                   | Surgical      | Orthopedic, arthroplasty             | full care path (surgical episode) | Direct              | provider         | provider             | Relative Value Unit costing                                   | Direct costing                           | implemented          | yes see second sheet                                 |
| 14 | Featherall, J.<br>Brigati, D. P.<br>Atney, A. N.<br>Faour, M.<br>Bokar, D. V.<br>Murray, T. G.<br>Mullins, R. M.<br>Ackerman, R. S.<br>Hirschi, M.<br>Alford, B.<br>Evans, T.<br>Kiluk, J. V.<br>Patel, S. Y. | Enhanced REVENUE After Surgery? A Cost-Standardized Enhanced Recovery Pathway for Mastectomy Decreases Length of Stay                                                     | 2019 | US | US, unspecified    | 103 patients                                                 | Oncology, mastectomy                                                   | Oncology      | unspecified                          | Direct and indirect               | payer               | payer            | none, charges        | Charges/Reimbursements-based                                  | N/A                                      | charges<br>no        |                                                      |

|                                                                                                                                                                                                        |      |    |                    |                 |                                                                    |                             |                          |                                           |                     |                  |                 |                                                               |                                          |                                          |                                                |                      |    |
|--------------------------------------------------------------------------------------------------------------------------------------------------------------------------------------------------------|------|----|--------------------|-----------------|--------------------------------------------------------------------|-----------------------------|--------------------------|-------------------------------------------|---------------------|------------------|-----------------|---------------------------------------------------------------|------------------------------------------|------------------------------------------|------------------------------------------------|----------------------|----|
| Williams, S. B.<br>Shan, Y.<br>Jazzar, U.<br>Mehra, H. B.<br>Baillargeon, J. G.<br>Huo, J.<br>Somasundara, A. J.<br>Schilling, P. L.<br>He, J.<br>Chen, S.<br>Placzek, H.<br>Bini, S. A.               | 2018 | US | US; various states | 3200 patients   | Oncology, urology, surgical, bladder cancer                        | Oncology                    |                          | partial care path                         | Direct and indirect | payer            | payer           | none, reimbursements                                          | Charges/Reimbursements-based             | N/A                                      | charges                                        | no                   |    |
| Lott, A.<br>Haglin, J.<br>Saleh, H.<br>Hall, J.<br>Egol, K. A.<br>Konda, S. R.                                                                                                                         | 2018 | US | US; various states | 366380 patients | Surgical                                                           | Surgical                    | Orthopedic, arthroplasty | partial care path                         | Direct and indirect | payer            | payer           | none, reimbursements                                          | Charges/Reimbursements-based             | N/A                                      | charges                                        | no                   |    |
| Ackerman, S. J.<br>Knight, T.<br>Wahl, P. M.<br>Cartwright, C. P.                                                                                                                                      | 2019 | US | US; various states | 1486 patients   | Acute care, geriatrics, Emergency care                             | emergency care & acute care |                          | partial care path                         | Direct              | provider         | provider        | unspecified; Hospital accounting data not otherwise specified | Direct costing                           | implemented                              |                                                | no                   |    |
| Peard, L.<br>Goodwin, J.<br>Hensley, P.<br>Dugan, A.<br>Bylund, J.<br>Harris, A. M.                                                                                                                    | 2019 | US | US; Kentucky       | 275 patients    | Surgical, robot, Robot-Assisted Laparoscopic Radical Prostatectomy | Surgical                    | Prostatectomy            | partial care path                         | Direct and indirect | provider         | provider        | unspecified; Hospital accounting data not otherwise specified | Absorption costing - unspecified generic | implemented                              |                                                | no                   |    |
| Patel, M. I.<br>Ramirez, D.<br>Agajanian, R.<br>Agajanian, H.<br>Bhattacharya, J.<br>Bundorf, K. M.                                                                                                    | 2020 | US | US; California     | 425 enrollees   | Oncology                                                           | Oncology                    |                          | partial care path                         | Direct and indirect | payer            | payer           | none, reimbursements                                          | Charges/Reimbursements-based             | N/A                                      | charges                                        | no                   |    |
| Harris, A. M.<br>Hensley, P.<br>Goodwin, J.<br>Dugan, A.<br>Peard, L.<br>Bell, J. R.<br>Stearns, L. J.<br>Narang, S.<br>Albright, R. E.<br>Hammond, K.<br>Xia, Y.<br>Richter, H. B.<br>McCreary, D. L. | 2019 | US | US; Kentucky       | 215 patients    | Urology, surgical, Nephrectomy                                     | Surgical                    | kidney                   | partial care path                         | Direct and indirect | provider         | provider        | unspecified; Hospital accounting data not otherwise specified | Absorption costing - unspecified generic | implemented                              |                                                | no                   |    |
| Dugarte, A. J.<br>Vang, S.<br>Pflowman, B.<br>Williams, B. R.<br>Parikh, H. R.                                                                                                                         | 2019 | US | US; Minnesota      | 67 patients     | orthopedics                                                        | Surgical                    | Orthopedic fracture      | partial care path (full surgical episode) | Direct and indirect | provider         | provider        | TDABC                                                         | Absorption costing - TDABC               | Paper only                               |                                                | yes see second sheet |    |
| Yamasaki, A.<br>Callans, K. M.<br>Shah, M.<br>Kaplan, R. S.<br>Hartnick, C.                                                                                                                            | 2020 | US | US; Massachusetts  | 10 patients     | Neonatal, pediatrics, tracheostomy, surgical                       | Pediatrics                  | Pediatric Neonatal       | partial care path                         | Direct and indirect | provider         | provider        | TDABC                                                         | Absorption costing - TDABC               | Paper only                               |                                                | yes see second sheet |    |
| Navarro, S. M.<br>Wang, E. Y.<br>Haeblerle, H. S.<br>Mont, M. A.<br>Krebs, V. E.<br>Patterson, B. M.<br>Skell, N. J.                                                                                   | 2018 | US | US; New York       | 141446 patients | orthopedics, total knee arthroplasty                               | Surgical                    | Orthopedic, arthroplasty | partial care path (surgical episode)      | Direct and indirect | provider (proxy) | payer           | none; charges, transformed with cost-to-charge ratio          | Charges/Reimbursements-based proxy       | N/A                                      | charges, transformed with cost-to-charge ratio | no                   |    |
| Butler, J.<br>O'Brien, D. C.<br>Kays, J. K.<br>Kubal, C.<br>Liangpunskul, S.                                                                                                                           | 2019 | US | US; Indiana        | 44 patients     | Oncology, renal                                                    | Oncology                    |                          | partial care path                         | Direct and indirect | provider (proxy) | payer           | none; charges                                                 | Charges/Reimbursements-based             | N/A                                      | charges                                        | no                   |    |
| Robinson, Jamie R.<br>Avritscher, Elenir B. C.<br>Gay, James C.<br>Willis, Zachary I.<br>Putnam, Luke R.<br>Anglemeyer, Andrew<br>Bodrogi, Elizabeth<br>Lubowitz, J. M.<br>Kominski, G. F.             | 2017 | US | US; Tennessee      | 313 patients    | Appendicitis, Pediatrics                                           | Pediatrics                  | Pediatric appendicitis   | partial care path (surgical episode)      | Direct and indirect | provider, payer  | provider, payer | none; charges, transformed with cost-to-charge ratio          | Charges/Reimbursements-based proxy       | Absorption costing - unspecified generic | N/A                                            | charges              | no |
|                                                                                                                                                                                                        | 2016 | US | US; California     | unspecified     | Diabetes                                                           | Internal Medicine           |                          | unspecified                               | Direct and indirect | provider (proxy) | payer           | none; charges, transformed with cost-to-charge ratio          | Charges/Reimbursements-based proxy       | N/A                                      | charges, transformed with cost-to-charge ratio | no                   |    |

|    |                                                                                                                                                                                                                                                                                                                                                                                                                                                                                                                                                                                                                                                                                        |                                                                                            |                                                                                                          |         |                    |                                      |                                                              |            |                          |                                      |                     |                  |          |                                                               |                                          |             |                                                |    |
|----|----------------------------------------------------------------------------------------------------------------------------------------------------------------------------------------------------------------------------------------------------------------------------------------------------------------------------------------------------------------------------------------------------------------------------------------------------------------------------------------------------------------------------------------------------------------------------------------------------------------------------------------------------------------------------------------|--------------------------------------------------------------------------------------------|----------------------------------------------------------------------------------------------------------|---------|--------------------|--------------------------------------|--------------------------------------------------------------|------------|--------------------------|--------------------------------------|---------------------|------------------|----------|---------------------------------------------------------------|------------------------------------------|-------------|------------------------------------------------|----|
| 1  | Johnson, J. T.<br>Scholtens, D. M.<br>Kuang, A.<br>Feng, X. Y.<br>Elaysh, O. M.<br>Post, L. A.<br>Marano, D. S.<br>Karnata, J. M.<br>Navarro, S. M.<br>Haeblerle, H. S.<br>Helm, J. M.<br>Kamath, A. F.<br>Schaffler, J. L.<br>Krauss, M. T.<br>Saifi, C.<br>Cazzulino, A.<br>Park, C.<br>Laratta, J.<br>Louie, P. K.<br>Shillingford, J. N.<br>Lehman, R.<br>Ning, M. S.<br>Palmer, M. B.<br>Shah, A. K.<br>Chambers, L. C.<br>Garlock, L. B.<br>Melson, B. B.<br>Lewicki, E.<br>Mukdad, L.<br>Mantha, A.<br>Aguayo, E.<br>Sanaitha, Y.<br>Jao, Y. Y.<br>Ziaecian, B.<br>Shannon, M. J.<br>Frankel, W. C.<br>Navarro, S. M.<br>Haeblerle, H. S.<br>Ramanathan, D.<br>Ranikumar, P. N. | 2<br>3<br>4<br>5<br>6<br>7<br>8<br>9<br>10<br>11<br>12<br>13<br>14<br>15<br>16<br>17<br>18 | Does value vary by center surgical volume for neonates with truncus arteriosus? A multicenter study      | US      | US; various states | 1024 neonates                        | Neonatal, pediatrics, surgical, cardiology, thoracic surgery | Pediatrics | Pediatric Neonatal       | full care path                       | Direct and indirect | provider (proxy) | payer    | none; charges, transformed with cost-to-charge ratio          | Charges/Reimbursements-based proxy       | N/A         | charges, transformed with cost-to-charge ratio | no |
| 19 | Boucek, D. M.<br>Lal, A. K.<br>Eckhauser, A. W.<br>Wong, H. Y. C.<br>Sheng, X.<br>Wilkes, J. F.<br>Keller, D. S.<br>Zhang, J.<br>Chand, M.                                                                                                                                                                                                                                                                                                                                                                                                                                                                                                                                             | 20<br>21<br>22<br>23                                                                       | Resource Utilization for Initial Hospitalization in Pediatric Heart Transplantation in the United States | US      | US; Pennsylvania   | 1629 patients                        | Pediatrics, cardiology                                       | Pediatrics | Pediatric surgical       | unspecified                          | Direct and indirect | provider (proxy) | payer    | none; charges, transformed with cost-to-charge ratio          | Charges/Reimbursements-based proxy       | N/A         | charges, transformed with cost-to-charge ratio | no |
| 24 | Reilly, R. F.                                                                                                                                                                                                                                                                                                                                                                                                                                                                                                                                                                                                                                                                          | 24                                                                                         | Creating a Value Dashboard for orthopedic Surgical Procedures                                            | Lebanon | Lebanon            | 6 surgeons' data                     | Orthopedics, total knee arthroplasty, total hip arthroplasty | Surgical   | Orthopedic, arthroplasty | unspecified                          | Direct              | provider         | provider | unspecified; Hospital accounting data not otherwise specified | Direct costing                           | implemented |                                                | no |
| 25 | Miller, P. E.<br>Guba, A.<br>Khera, R.<br>Chouairi, F.<br>Ahmad, T.<br>Nasir, K.<br>Addison, D.                                                                                                                                                                                                                                                                                                                                                                                                                                                                                                                                                                                        | 25<br>26<br>27<br>28<br>29                                                                 | National Trends in Healthcare-Associated Infections for Five Common Cardiovascular Conditions            | US      | US; various states | 1788982 hospitalizations             | Cardiology, cardiovascular                                   | Cardiology |                          | unspecified                          | Direct and indirect | provider (proxy) | payer    | none; charges, transformed with cost-to-charge ratio          | Charges/Reimbursements-based proxy       | N/A         | charges, transformed with cost-to-charge ratio | no |
| 30 | Konda, Sanjit R.<br>Lott, Ariana<br>Egol, Kenneth A.                                                                                                                                                                                                                                                                                                                                                                                                                                                                                                                                                                                                                                   | 30<br>31                                                                                   | The coming hip and femur fracture bundle: A new inpatient risk stratification tool for care providers    | US      | US; New York       | 173 patients                         | Orthopedics, Geriatrics, total hip arthroplasty              | Surgical   | Orthopedic, arthroplasty | partial care path                    | Direct              | provider         | provider | unspecified; Hospital accounting data not otherwise specified | Direct costing                           | implemented |                                                | no |
| 32 | Winegar, A. L.<br>Jackson, L. W.<br>Sambare, T. D.<br>Liu, T. C.<br>Banks, S. R.<br>Erlinger, T. P.<br>Cochran, W. R.<br>Rocque, G. B.<br>Williams, C. P.<br>Kenzi, K. M.<br>Jackson, B. E.<br>Halilova, K. I.<br>Sullivan, M. M.<br>Laratta, J. L.<br>Reddy, H.<br>Lombardi, J. M.<br>Shillingford, J. N.<br>Saifi, C.<br>Fischer, C. R.<br>Lehman, R. A.<br>Karnata, J. M.<br>Golubovsky, J. L.<br>Haeblerle, H. S.<br>Rajan, P. V.<br>Navarro, S. M.<br>Kamath, A. F.<br>Schaffler, J. L.                                                                                                                                                                                           | 32<br>33<br>34<br>35<br>36<br>37<br>38<br>39<br>40<br>41<br>42                             | A Surgeon Scorecard Is Associated with Improved Value in Elective Primary Hip and Knee Arthroplasty      | US      | US; Texas          | 470 patients                         | Surgical, total hip arthroplasty, knee arthroplasty          | Surgical   | Orthopedic, arthroplasty | partial care path                    | Direct and indirect | provider         | provider | unspecified; Hospital accounting data not otherwise specified | Absorption costing - unspecified/generic | implemented |                                                | no |
| 43 | Where Are the Opportunities for Reducing Health Care Spending Within Alternative Payment Models?                                                                                                                                                                                                                                                                                                                                                                                                                                                                                                                                                                                       | 43                                                                                         |                                                                                                          | US      | US; Alabama        | 3427 patients from 12 cancer centers | Oncology                                                     | Oncology   |                          | partial care path                    | Direct and indirect | payer            | payer    | none; reimbursements                                          | Charges/Reimbursements-based             | N/A         | reimbursements                                 | no |
| 44 | Utilization of Interspinous Devices Throughout the United States Over a Recent Decade: An Analysis of the Nationwide Inpatient Sample                                                                                                                                                                                                                                                                                                                                                                                                                                                                                                                                                  | 44                                                                                         |                                                                                                          | US      | US; various states | 14225 patients                       | Surgical, spine                                              | Surgical   | Spine                    | partial care path (surgical episode) | Direct and indirect | provider (proxy) | payer    | none; charges, transformed with cost-to-charge ratio          | Charges/Reimbursements-based proxy       | N/A         | charges, transformed with cost-to-charge ratio | no |
| 45 | Can a machine learning model accurately predict patient resource utilization following lumbar spinal fusion?                                                                                                                                                                                                                                                                                                                                                                                                                                                                                                                                                                           | 45                                                                                         |                                                                                                          | US      | US; various states | 38070 patients                       | Spine, lumbar spinal fusion                                  | Surgical   | Spine                    | unspecified                          | Direct and indirect | provider (proxy) | payer    | none; charges, transformed with cost-to-charge ratio          | Charges/Reimbursements-based proxy       | N/A         | charges, transformed with cost-to-charge ratio | no |

|    |                                                                                                                       |      |    |                    |                                                                                                         |                                                                                                                       |                   |                             |                                              |                     |                     |          |                                                               |                                             |             |                                                                                |                         |
|----|-----------------------------------------------------------------------------------------------------------------------|------|----|--------------------|---------------------------------------------------------------------------------------------------------|-----------------------------------------------------------------------------------------------------------------------|-------------------|-----------------------------|----------------------------------------------|---------------------|---------------------|----------|---------------------------------------------------------------|---------------------------------------------|-------------|--------------------------------------------------------------------------------|-------------------------|
| 1  | Karmuta, J. M.<br>Navarro, S. M.<br>Haberle, H. S.<br>Billow, D. G.<br>Krebs, V. E.<br>Ranikumar, P. N.               | 2019 | US | US; New York       | 9856 patients                                                                                           | orthopedics, hip fracture,<br>trauma                                                                                  | Surgical          | Orthopedic<br>fracture      | partial care path                            | Direct and indirect | provider<br>(proxy) | payer    | none; estimation,<br>cost-to-charge<br>ratio, SPARCS<br>data  | Charges/Reimburse<br>ment t-based proxy     | N/A         | charges,<br>transformed with<br>cost-to-charge<br>ratio                        | no                      |
| 2  | Cicchini, M.<br>Vollstsky, S.<br>McCann, G.<br>Mancini, M.<br>Sanzari, L.<br>Yannopoulos, A.                          | 2020 | US | US; Connecticut    | 433 patients                                                                                            | surgical, elective<br>laminectomy                                                                                     | Surgical          | Spine                       | partial care path                            | Direct              | provider            | provider | direct costs                                                  | Direct costing                              | unspecified |                                                                                | no                      |
| 3  | Navarro, S. M.<br>Ranikumar, P. N.<br>Egger, A. C.<br>Goodwin, R. C.                                                  | 2018 | US | US; New York       | 3224 patients                                                                                           | Orthopedic, Pediatrics,<br>Adolescent Idiopathic<br>Scoliosis                                                         | Pediatrics        | Pediatric other             | partial care path                            | Direct and indirect | provider<br>(proxy) | payer    | none; estimation,<br>cost-to-charge<br>ratio, SPARCS<br>data  | Charges/Reimburse<br>ment t-based proxy     | N/A         | charges,<br>transformed with<br>cost-to-charge<br>ratio                        | no                      |
| 4  | Batenti, S. B.<br>Gingrich, A. A.<br>Hoch, J. S.<br>Canter, R. J.<br>Bold, R. J.                                      | 2019 | US | US; California     | 2786 patients, 157<br>hospitals                                                                         | Oncology, pancreatic<br>cancer                                                                                        | Oncology          |                             | unspecified                                  | Direct and indirect | provider<br>(proxy) | payer    | none; charges,<br>transformed with<br>cost-to-charge<br>ratio | Charges/Reimburse<br>ment t-based proxy     | N/A         | charges,<br>transformed with<br>cost-to-charge<br>ratio                        | no                      |
| 5  | Xiao, R.<br>Miller, J. A.<br>Zafra, W. J.<br>Goretski, E. Z.<br>Young, J. B.                                          | 2018 | US | US; unspecified    | 6363 patients                                                                                           | Multiple                                                                                                              | multiple          |                             | partial care path                            | Direct and indirect | provider<br>(proxy) | payer    | none; charges,<br>transformed with<br>cost-to-charge<br>ratio | Charges/Reimburse<br>ment t-based proxy     | N/A         | charges,<br>transformed with<br>cost-to-charge<br>ratio                        | no                      |
| 6  | Ramshaw, B.<br>Forman, B. R.<br>Moore, K.<br>Heidel, E.<br>Fabian, M.<br>Mancini, G.                                  | 2017 | US | US; Texas          | 102 patients                                                                                            | Surgical, complex<br>abdominal wall<br>reconstruction                                                                 | Surgical          | Abdominal                   | full care path (surgical<br>episode)         | Direct and indirect | provider            | provider | unspecified                                                   | Absorption costing -<br>unspecified/generic | implemented |                                                                                | no                      |
| 7  | Heinzelman, M.<br>Schumann, S. O.<br>Riley, J.<br>Zhang, J.<br>Marsden, J. E.<br>Mauldin, P. D.                       | 2016 | US | US; unspecified    | 7571 patients                                                                                           | Internal medicine                                                                                                     | Internal Medicine |                             | unspecified                                  | Direct and indirect | provider            | provider | unspecified                                                   | Absorption costing -<br>unspecified/generic | implemented |                                                                                | no                      |
| 8  | Sheetz, K. H.<br>Kenney, B.<br>Dupree, J. M.<br>Campbell, D. A.<br>Englesbe, M. J.                                    | 2019 | US | US; Michigan       | 1923 patients                                                                                           | Surgical, Laparoscopic<br>Cholecystectomy                                                                             | Surgical          | Gallbladder                 | partial care path                            | Direct and indirect | payer               | payer    | none,<br>reimbursements                                       | Charges/Reimburse<br>ment t-based           | N/A         | reimbursements                                                                 | no                      |
| 9  | Zolin, S. J.<br>Tastaldi, L.<br>Alkhatib, H.<br>Lampert, E. J.<br>Brown, K.<br>Fafaj, A.                              | 2020 | US | US; various states | All medicare<br>shoulder surgeries<br>2002-2018                                                         | orthopedics, Surgical,<br>Shoulder surgery                                                                            | Surgical          | Abdominal                   | partial care path                            | Direct and indirect | payer               | payer    | none,<br>reimbursements                                       | Charges/Reimburse<br>ment t-based           | N/A         | reimbursements                                                                 | no                      |
| 10 | Ahluwalia, R.<br>Vainieri, E.<br>Tam, J.<br>Sait, S.<br>Sinha, A.<br>Mani, C. A.                                      | 2019 | UK | UK; London         | single center,<br>retrospective,<br>direct<br>observation,<br>pre and post<br>comparison<br>53 patients | Surgical, diabetic foot<br>infection, diabetes                                                                        | Surgical          | Diabetes                    | partial care path (full<br>surgical episode) | Direct and indirect | payer               | payer    | TDABC                                                         | Absorption costing -<br>TDABC               | Paper only  |                                                                                | yes see second<br>sheet |
| 11 | Ramly, E. P.<br>Laurentzakis, A.<br>Bolnen, J. D.<br>Mavros, M.<br>Chang, Y.<br>Lee, J.<br>Sarkar, D. P.              | 2015 | US | US; Massachusetts  | 9111 patients                                                                                           | surgical, abdominal<br>surgery                                                                                        | Surgical          | Abdominal                   | unspecified                                  | Direct and indirect | provider            | provider | unspecified                                                   | Absorption costing -<br>unspecified/generic | implemented |                                                                                | no                      |
| 12 | Orbanu, V.<br>Urits, I.<br>Olusunmade, M.<br>Owais, K.<br>Jones, M.<br>Galasso, A.                                    | 2018 | US | US; unspecified    | 115976 patients                                                                                         | Surgical, depression,<br>psychiatry                                                                                   | Pain medicine     |                             | partial care path                            | Direct and indirect | payer               | payer    | none; charges                                                 | Charges/Reimburse<br>ment t-based           | N/A         |                                                                                | no                      |
| 13 | Hollenbeck, B.<br>Hoffman, M. A.<br>Trommhauser, S. G.                                                                | 2020 | US | US; various states | 1651354 total hip or<br>total knee<br>arthroplasties                                                    | orthopedics, surgical,<br>total knee arthroplasty                                                                     | Surgical          | Orthopedic,<br>arthroplasty | unspecified                                  | Direct and indirect | provider<br>(proxy) | payer    | none; charges                                                 | Charges/Reimburse<br>ment t-based           | N/A         | charges per<br>quartile, discuss<br>how it should be<br>costs in<br>discussion | no                      |
| 14 | Loftus, T. J.<br>Rosenthal, M. D.<br>Croft, C. A.<br>Stephen Smith, R.<br>Efron, P. A.<br>Moore, F. A.<br>Lobo, A. M. | 2018 | US | US; Florida        | 800 patients                                                                                            | Acute care, appendicitis,<br>surgical laparotomy for<br>intra-abdominal sepsis<br>with temporary<br>abdominal closure | Surgical          | Appendicitis                | full care path (surgical<br>episode)         | unspecified         | payer               | payer    | none,<br>reimbursements                                       | Charges/Reimburse<br>ment t-based           | N/A         | charges, discuss<br>shortcoming in<br>discussion                               | no                      |

|    |                                                                                                                                                 |      |    |                 |                                                          |                                                 |          |                     |                                   |             |       |       |                      |                              |     |                  |
|----|-------------------------------------------------------------------------------------------------------------------------------------------------|------|----|-----------------|----------------------------------------------------------|-------------------------------------------------|----------|---------------------|-----------------------------------|-------------|-------|-------|----------------------|------------------------------|-----|------------------|
| 1  | Buell, J. F.<br>Sigmon, D.<br>Dacon, C.<br>Shapiro, M.<br>Teja, N.<br>Wynter, E.<br>Jain, N.<br>Phillips, F. M.<br>Shimer, A. L.<br>Khan, S. N. | 2017 | US | US, Louisiana   | 73 patients                                              | Surgical, complex abdominal wall reconstruction | Surgical | Abdominal           | full care path (surgical episode) | unspecified | payer | payer | none, charges        | Charges/Reimbursements-based | N/A | no               |
| 2  |                                                                                                                                                 |      |    |                 |                                                          |                                                 |          |                     |                                   |             |       |       |                      |                              |     |                  |
| 3  |                                                                                                                                                 |      |    |                 |                                                          |                                                 |          |                     |                                   |             |       |       |                      |                              |     |                  |
| 4  |                                                                                                                                                 |      |    |                 |                                                          |                                                 |          |                     |                                   |             |       |       |                      |                              |     |                  |
| 5  |                                                                                                                                                 |      |    |                 |                                                          |                                                 |          |                     |                                   |             |       |       |                      |                              |     |                  |
| 6  |                                                                                                                                                 |      |    |                 |                                                          |                                                 |          |                     |                                   |             |       |       |                      |                              |     |                  |
| 7  |                                                                                                                                                 |      |    |                 |                                                          |                                                 |          |                     |                                   |             |       |       |                      |                              |     |                  |
| 8  | Stull, J. D.<br>Bhat, S. B.<br>Kane, J. M.<br>Raikan, S. M.                                                                                     | 2017 | US | US, unspecified | 76 cases/patients, and 48044 retrospective patient files | orthopedics, Surgical, ankle fractures          | Surgical | Orthopedic fracture | unspecified                       | unspecified | payer | payer | none, reimbursements | Charges/Reimbursements-based | N/A | reimbursement no |
| 9  |                                                                                                                                                 |      |    |                 |                                                          |                                                 |          |                     |                                   |             |       |       |                      |                              |     |                  |
| 10 |                                                                                                                                                 |      |    |                 |                                                          |                                                 |          |                     |                                   |             |       |       |                      |                              |     |                  |
| 11 |                                                                                                                                                 |      |    |                 |                                                          |                                                 |          |                     |                                   |             |       |       |                      |                              |     |                  |
| 12 |                                                                                                                                                 |      |    |                 |                                                          |                                                 |          |                     |                                   |             |       |       |                      |                              |     |                  |
| 13 |                                                                                                                                                 |      |    |                 |                                                          |                                                 |          |                     |                                   |             |       |       |                      |                              |     |                  |
| 14 |                                                                                                                                                 |      |    |                 |                                                          |                                                 |          |                     |                                   |             |       |       |                      |                              |     |                  |
| 15 |                                                                                                                                                 |      |    |                 |                                                          |                                                 |          |                     |                                   |             |       |       |                      |                              |     |                  |
| 16 |                                                                                                                                                 |      |    |                 |                                                          |                                                 |          |                     |                                   |             |       |       |                      |                              |     |                  |
| 17 |                                                                                                                                                 |      |    |                 |                                                          |                                                 |          |                     |                                   |             |       |       |                      |                              |     |                  |
| 18 |                                                                                                                                                 |      |    |                 |                                                          |                                                 |          |                     |                                   |             |       |       |                      |                              |     |                  |
| 19 |                                                                                                                                                 |      |    |                 |                                                          |                                                 |          |                     |                                   |             |       |       |                      |                              |     |                  |
| 20 |                                                                                                                                                 |      |    |                 |                                                          |                                                 |          |                     |                                   |             |       |       |                      |                              |     |                  |
| 21 |                                                                                                                                                 |      |    |                 |                                                          |                                                 |          |                     |                                   |             |       |       |                      |                              |     |                  |
| 22 |                                                                                                                                                 |      |    |                 |                                                          |                                                 |          |                     |                                   |             |       |       |                      |                              |     |                  |
| 23 |                                                                                                                                                 |      |    |                 |                                                          |                                                 |          |                     |                                   |             |       |       |                      |                              |     |                  |
| 24 |                                                                                                                                                 |      |    |                 |                                                          |                                                 |          |                     |                                   |             |       |       |                      |                              |     |                  |
| 25 |                                                                                                                                                 |      |    |                 |                                                          |                                                 |          |                     |                                   |             |       |       |                      |                              |     |                  |
| 26 |                                                                                                                                                 |      |    |                 |                                                          |                                                 |          |                     |                                   |             |       |       |                      |                              |     |                  |
| 27 |                                                                                                                                                 |      |    |                 |                                                          |                                                 |          |                     |                                   |             |       |       |                      |                              |     |                  |
| 28 |                                                                                                                                                 |      |    |                 |                                                          |                                                 |          |                     |                                   |             |       |       |                      |                              |     |                  |
| 29 |                                                                                                                                                 |      |    |                 |                                                          |                                                 |          |                     |                                   |             |       |       |                      |                              |     |                  |
| 30 |                                                                                                                                                 |      |    |                 |                                                          |                                                 |          |                     |                                   |             |       |       |                      |                              |     |                  |
| 31 |                                                                                                                                                 |      |    |                 |                                                          |                                                 |          |                     |                                   |             |       |       |                      |                              |     |                  |
| 32 |                                                                                                                                                 |      |    |                 |                                                          |                                                 |          |                     |                                   |             |       |       |                      |                              |     |                  |
| 33 |                                                                                                                                                 |      |    |                 |                                                          |                                                 |          |                     |                                   |             |       |       |                      |                              |     |                  |
| 34 |                                                                                                                                                 |      |    |                 |                                                          |                                                 |          |                     |                                   |             |       |       |                      |                              |     |                  |
| 35 |                                                                                                                                                 |      |    |                 |                                                          |                                                 |          |                     |                                   |             |       |       |                      |                              |     |                  |
| 36 |                                                                                                                                                 |      |    |                 |                                                          |                                                 |          |                     |                                   |             |       |       |                      |                              |     |                  |
| 37 |                                                                                                                                                 |      |    |                 |                                                          |                                                 |          |                     |                                   |             |       |       |                      |                              |     |                  |
| 38 |                                                                                                                                                 |      |    |                 |                                                          |                                                 |          |                     |                                   |             |       |       |                      |                              |     |                  |
| 39 |                                                                                                                                                 |      |    |                 |                                                          |                                                 |          |                     |                                   |             |       |       |                      |                              |     |                  |
| 40 |                                                                                                                                                 |      |    |                 |                                                          |                                                 |          |                     |                                   |             |       |       |                      |                              |     |                  |
| 41 |                                                                                                                                                 |      |    |                 |                                                          |                                                 |          |                     |                                   |             |       |       |                      |                              |     |                  |
| 42 |                                                                                                                                                 |      |    |                 |                                                          |                                                 |          |                     |                                   |             |       |       |                      |                              |     |                  |
| 43 |                                                                                                                                                 |      |    |                 |                                                          |                                                 |          |                     |                                   |             |       |       |                      |                              |     |                  |
| 44 |                                                                                                                                                 |      |    |                 |                                                          |                                                 |          |                     |                                   |             |       |       |                      |                              |     |                  |
| 45 |                                                                                                                                                 |      |    |                 |                                                          |                                                 |          |                     |                                   |             |       |       |                      |                              |     |                  |
| 46 |                                                                                                                                                 |      |    |                 |                                                          |                                                 |          |                     |                                   |             |       |       |                      |                              |     |                  |

|    |                                                                                                                                                                                                         |      |                 |                    |                                                                                                                                  |                                                                     |                                                     |                                                                                  |                          |                                           |                                           |                     |                   |                                          |                                          |                                          |                      |                      |    |
|----|---------------------------------------------------------------------------------------------------------------------------------------------------------------------------------------------------------|------|-----------------|--------------------|----------------------------------------------------------------------------------------------------------------------------------|---------------------------------------------------------------------|-----------------------------------------------------|----------------------------------------------------------------------------------|--------------------------|-------------------------------------------|-------------------------------------------|---------------------|-------------------|------------------------------------------|------------------------------------------|------------------------------------------|----------------------|----------------------|----|
| 1  | Kaplan, A. L., Agarwal, N., Setlur, N. P., Tian, H. J., Niedzwiecki, D., McLaughlin, N., Pong, J., Crawford, K., Faraji, R., Ramsay, C., Kemp, A., Califano, J. A.                                      | 2015 | US              | US, California     | Measuring the cost of care in benign prostatic hyperplasia using time driven activity-based costing (TDABC)                      | single center, retrospective, direct observation                    | one care pathway, 5 surgical options                | Urology, benign prostatic hyperplasia                                            | Urology                  | partial care path (full surgical episode) | Direct and indirect                       | provider            | provider          | TDABC                                    | Absorption costing - TDABC               | unspecified                              | yes see second sheet |                      |    |
| 2  | Lobatto, D. J., van den Hout, W. B., de Vries, F. F., Schutte, P. J., Patel, M. I., Ramirez, D., Agajanian, R., Agajanian, H., Coker, T.                                                                | 2020 | US              | US; various states | An Analysis of 1-Year Charges for Head and Neck Cancer: Targets for Value-Based Interventions                                    | 196 consecutive patients                                            | Oncology, head and neck cancer                      | Oncology                                                                         | partial care path        | Direct and indirect                       | payer                                     | payer               | none; charges     | Charges/Reimbursement-based              | N/A                                      | charges                                  | no                   |                      |    |
| 3  | Lobatto, D. J., van den Hout, W. B., de Vries, F. F., Schutte, P. J., Patel, M. I., Ramirez, D., Agajanian, R., Agajanian, H., Coker, T.                                                                | 2020 | The Netherlands | The Netherlands    | Feasibility, safety, and outcomes of a stratified fast-track care trajectory in pituitary surgery                                | prospective, observational study, process mapping                   | 155 patients                                        | Endocrinology, surgical, pituitary                                               | endocrinology            | partial care path (full surgical episode) | Direct and indirect                       | provider            | provider          | reference pricing                        | Absorption costing - unspecified/generic | Paper only                               | no                   |                      |    |
| 4  | Jalilian, H., Doshmangir, L., Ajami, S., Mir, H., Siraneh, Y., Hasanpoor, E.                                                                                                                            | 2019 | Iran            | Iran               | Economic burden of gastric cancer in the first six months after diagnosis                                                        | 118 patients                                                        | Oncology, bowel, gastric cancer                     | Oncology                                                                         | unspecified              | Direct and indirect                       | provider                                  | provider            | unspecified       | Absorption costing - unspecified/generic | Paper only                               | no                                       |                      |                      |    |
| 5  | Lobatto, D. J., van den Hout, W. B., Najafabadi, A. H. Z., Steffens, A. N. V., Andela, C. D., Pereira, A. M., Gray, C. F., Prieto, H. A., Deen, J. T., Parvataneni, H. K.                               | 2019 | The Netherlands | The Netherlands    | Healthcare utilization and costs among patients with non-functioning pituitary adenomas                                          | 167 patients                                                        | Endocrinology, Pituitary adenoma                    | endocrinology                                                                    | partial care path        | Direct and indirect                       | provider                                  | provider            | reference pricing | Absorption costing - unspecified/generic | N/A                                      | no                                       |                      |                      |    |
| 6  | Kurt, P., Saban, M., Cankaya, F., Annac, M. C.                                                                                                                                                          | 2019 | US              | US, Florida        | Bundled Payment "Creep": Institutional Redesign for Primary Arthroplasty Positively Affects Revision Arthroplasty                | 168 patients                                                        | orthopedics, total joint arthroplasty               | Surgical                                                                         | Orthopedic, arthroplasty | full care path (surgical episode)         | Direct and indirect                       | payer, provider     | payer             | provider                                 | none; charges                            | Charges/Reimbursement-based              | Direct costing       | N/A                  | no |
| 7  | Thaci, B., McGirt, M. J., Ammerman, J. M., Thome, C., Kim, K. D., Ament, J. D.                                                                                                                          | 2019 | Turkey          | Turkey             | Time-Driven Activity-Based Costing in the Ophthalmology Department of State Hospital: A Case Study                               | single center, retrospective, case study                            | case study; 5 surgical procedures in one department | Ophthalmology                                                                    | ophthalmology            | full care path                            | Direct and indirect                       | provider            | provider          | TDABC                                    | Absorption costing - TDABC               | Paper only                               | yes see second sheet |                      |    |
| 8  | Karns, M. R., Jones, D. L., Todd, D. C., Maak, T. G., Aoki, S. K., Barks, R. T., Robinson, J. R., Carter, N. H., Gibson, C., Brinkman, A. S., Van Arendonk, K., Speck, K. E., Gupta, P., Rettiganti, M. | 2018 | US              | US, California     | Reduction of direct costs in high-risk lumbar discectomy patients during the 90-day post-operative period through amular closure | randomized controlled trial                                         | 272 patients                                        | Surgical, high-risk lumbar discectomy                                            | Surgical                 | Spine                                     | partial care path                         | Direct and indirect | payer             | payer                                    | none; charges                            | Charges/Reimbursement-based              | N/A                  | no                   |    |
| 9  | Ilg, A. M., Laviana, A. A., Kamrava, M., Veruttipong, D., Steinberg, M., Park, S. J., McLaughlin, N., Burke, M. A., Setlur, N. P., Niedzwiecki, D. R., Kaplan, A. L., Saigal, C., Mahajan, A.           | 2018 | US              | US, Tennessee      | Patient- and Procedure-Specific Variables Driving Total Direct Costs of Outpatient Anterior Cruciate Ligament Reconstruction     | Retrospective cohort, single center, economic and decision analysis | 434 patients                                        | orthopedic, surgical, Anterior Cruciate Ligament Reconstruction, sports medicine | Surgical                 | Orthopedic                                | partial care path (full surgical episode) | Direct              | provider          | provider                                 | VDO tool, total direct costs             | Direct costing                           | implemented          | yes see second sheet |    |
| 10 | Robinson, J. R., Carter, N. H., Gibson, C., Brinkman, A. S., Van Arendonk, K., Speck, K. E., Gupta, P., Rettiganti, M.                                                                                  | 2018 | US              | US, Tennessee      | Improving the value of care for appendectomy through an individual surgeon-specific approach                                     | prospective observational study                                     | 216 patients                                        | Appendicitis, surgical                                                           | Surgical                 | Appendicitis                              | partial care path (full surgical episode) | Direct and indirect | provider          | provider                                 | reference pricing                        | Absorption costing - unspecified/generic | N/A                  | yes see second sheet |    |
| 11 | Ilg, A. M., Laviana, A. A., Kamrava, M., Veruttipong, D., Steinberg, M., Park, S. J., McLaughlin, N., Burke, M. A., Setlur, N. P., Niedzwiecki, D. R., Kaplan, A. L., Saigal, C., Mahajan, A.           | 2017 | US              | US; various states | Relationship of Hospital Costs With Mortality in Pediatric Critical Care: A Multi-Institutional Analysis                         | single center, pre and post intervention (dashboard)                | 917,663 patients, 47 hospitals                      | Acute care, pediatrics                                                           | pediatrics               | Pediatric acute care                      | partial care path                         | unspecified         | payer             | payer                                    | unspecified                              | Charges/Reimbursement-based              | N/A                  | charges              | no |
| 12 | Ilg, A. M., Laviana, A. A., Kamrava, M., Veruttipong, D., Steinberg, M., Park, S. J., McLaughlin, N., Burke, M. A., Setlur, N. P., Niedzwiecki, D. R., Kaplan, A. L., Saigal, C., Mahajan, A.           | 2016 | US              | US, California     | Time-driven activity-based costing of low-dose-rate and high-dose-rate brachytherapy for low-risk prostate cancer                | single center, retrospective, process mapping, direct observation   | 2 treatment options                                 | Oncology, prostate cancer, brachytherapy                                         | Oncology                 | full care path                            | Direct and indirect                       | provider            | provider          | TDABC                                    | Absorption costing - TDABC               | Paper only                               | yes see second sheet |                      |    |
| 13 | Ilg, A. M., Laviana, A. A., Kamrava, M., Veruttipong, D., Steinberg, M., Park, S. J., McLaughlin, N., Burke, M. A., Setlur, N. P., Niedzwiecki, D. R., Kaplan, A. L., Saigal, C., Mahajan, A.           | 2014 | US              | US, California     | Time-driven activity-based costing: a driver for provider engagement in costing activities and redesign initiatives              | single center, process mapping                                      | 2 pilots                                            | Urology, neurosurgery                                                            | Surgical                 | Neurosurgery                              | partial care path (full surgical episode) | Direct and indirect | provider          | provider                                 | TDABC                                    | Absorption costing - TDABC               | implemented          | no                   |    |

|    |                                                                                                                                                                                                                                                        |      |           |                    |                                        |                                         |                                                              |                             |                          |                                   |                     |          |                                                               |                                                               |                                          |                 |                                    |                      |
|----|--------------------------------------------------------------------------------------------------------------------------------------------------------------------------------------------------------------------------------------------------------|------|-----------|--------------------|----------------------------------------|-----------------------------------------|--------------------------------------------------------------|-----------------------------|--------------------------|-----------------------------------|---------------------|----------|---------------------------------------------------------------|---------------------------------------------------------------|------------------------------------------|-----------------|------------------------------------|----------------------|
| 1  | Keating, C. L., Dixon, J. B., Moodie, M. L., Pieters, A., Playfair, J., O'Brien, P. E.                                                                                                                                                                 | 2009 | Australia | Australia          | randomized controlled trial            | 40 patients, 23 surgical, 7 medical     | Surgical, Diabetes                                           | Internal Medicine           | unspecified              | Direct                            | provider            | provider | direct costs                                                  | Direct costing                                                | Paper only                               | no              |                                    |                      |
| 2  | Nelson, A. A., Pearce, D. J., Fleischer, A. B., Balkrishnan, R., Feldman, S. R.                                                                                                                                                                        | 2005 | US        | US; Ohio           | 208 inpatient admissions               |                                         | Psoriasis, Dermatology                                       | Dermatology                 | partial care path        | Direct and indirect               | payer               | payer    | none; charges                                                 | Charges/Reimbursements t-based                                | N/A                                      | charges         | no                                 |                      |
| 3  | Yanik, John M., Bedard, Nicholas A., Hanley, Jessica M., Otero, Jesse E., Callaghan, John J., Marsh, John L.                                                                                                                                           | 2018 | US        | US; Iowa           | 78 patients                            |                                         | orthopedics, total hip arthroplasty, total knee arthroplasty | Surgical                    | Orthopedic, arthroplasty | full care path                    | Direct and indirect | provider | provider                                                      | unspecified; Hospital accounting data not otherwise specified | Absorption costing - unspecified/generic | unspecified     | no                                 |                      |
| 4  | Zhang, Steven, Vora, Molly, Harris, Alex H. S., Baker, Laurence, Curtin, Catherine, Kamal, Robin N.                                                                                                                                                    | 2016 | US        | US; California     | 16 million patient records             |                                         | Carpal Tunnel Release                                        | Surgical                    | Carpal Tunnel Release    | full care path (surgical episode) | Direct and indirect | payer    | payer                                                         | none, reimbursements                                          | Charges/Reimbursements t-based           | N/A             | reimbursements                     | no                   |
| 5  | A. Adenkinju, R. Ranson, S. A. Rettig, K. A. Egol and S. R. Konda                                                                                                                                                                                      | 2021 | US        | US; New York       |                                        |                                         | Orthopedic, Geriatric, Operative Distal Radius Fractures     | Surgical                    | Orthopedic fracture      | unspecified                       | Direct and indirect | payer    | payer                                                         | unspecified; Hospital accounting data not otherwise specified | Charges/Reimbursements t-based           | N/A             | index admission cost, per category | no                   |
| 6  | A. Albrahim, Y. Abdulsalam, S. Al Mutawa, H. Behbehani, D. Alhuwaii and S. Al Jenai                                                                                                                                                                    | 2021 | Kuwait    | Kuwait             | single center, observation, interviews | one pharmacy                            | Diabetes, pharmacy                                           | Internal Medicine           | partial care path        | Direct and indirect               | provider            | provider | TDABC                                                         | Absorption costing - TDABC                                    | unspecified                              |                 | yes see second sheet               |                      |
| 7  | D. J. Baughman, A. Waheed, M. N. Khan and J. M. Nicholson                                                                                                                                                                                              | 2021 | US        | US; Pennsylvania   |                                        |                                         | Emergency care                                               | emergency care & acute care | unspecified              | Direct and indirect               | payer               | payer    | none; charges                                                 | Charges/Reimbursements t-based                                | N/A                                      | average charges | no                                 |                      |
| 8  | J. A. Berinstein, S. A. Cohen-Mekelburg, G. M. Greenberg, D. Wray, S. K. Berry, S. D. Saini, A. M. Fendrick, M. A. Adams, A. K. Wajjee and D. D. Hwang                                                                                                 | 2021 | US        | US; Michigan       |                                        |                                         | IBS/IBD inflammatory bowel disease                           | Internal Medicine           | partial care path        | Direct and indirect               | payer               | payer    | none; charges                                                 | Charges/Reimbursements t-based                                | N/A                                      | charges         | no                                 |                      |
| 9  | A. Beschloss, C. Dicindio, J. Lombardi, A. Varthi, A. Ozurk, R. Lehman, L. Lenke and C. Saifi                                                                                                                                                          | 2021 | US        | US; various states |                                        |                                         | Orthopedic, Spinal Deformity Surgery                         | Surgical                    | Spine                    | full care path                    | Direct and indirect | provider | provider                                                      | none; charges                                                 | Charges/Reimbursements t-based           | N/A             | unspecified                        | no                   |
| 10 | H. Baeno, J. L. Bernal, V. Jimenez-Jimenez, F. J. Martin-Sanchez, X. Rosello, G. Moreno, C. Goni, V. Gil, P. Llorens, N. Naranjo, J. Lopez, D. Hernandez, R. A. Burnett Iii, J. Yang, P. M. Courtney, E. B. Terhune, C. P. Hamon and C. J. Della Valle | 2021 | Spain     | Spain              | Retrospective, multi-center            | 30 day period of heart failure patients | heart failure, cardiovascular                                | Cardiology                  | partial care path        | Direct and indirect               | provider            | provider | DRG costs                                                     | Absorption costing - unspecified/generic                      | implemented                              |                 | yes see second sheet               |                      |
| 11 | M. Casey, D. Perera, J. Enticott, H. Vo, S. Cubra, A. Gravell, M. Waerea and G. Habib                                                                                                                                                                  | 2021 | US        | US; various states |                                        |                                         | Total knee arthroplasty, orthopedic                          | Surgical                    | Orthopedic, arthroplasty | full care path                    | Direct and indirect | provider | provider                                                      | none; reimbursements                                          | Charges/Reimbursements t-based           | N/A             | reimbursement                      | no                   |
| 12 | K. A. Chovancec, C. Arsene, A. Beck and B. Liddel                                                                                                                                                                                                      | 2022 | Australia | Australia          |                                        |                                         | Emergency care                                               | emergency care & acute care | partial care path        | Direct and indirect               | provider            | provider | unspecified; Hospital accounting data not otherwise specified | Absorption costing - unspecified/generic                      | N/A                                      |                 | yes see second sheet               |                      |
| 13 | R. V. Cohen, A. M. Nishikawa, R. A. Ribeiro, F. M. Oliveira, P. C. Andrade, S. M. Junqueira and B. Toldo                                                                                                                                               | 2021 | Brazil    | Brazil             |                                        |                                         | Obesity, surgical, bariatric surgery                         | Surgical                    | Bariatric                | full care path                    | Direct and indirect | provider | provider                                                      | reference pricing                                             | Absorption costing - unspecified/generic | N/A             |                                    | yes see second sheet |



|    |                                                                                                                                                                                                                       |      |        |              |                                                                        |     |                                                          |            |                                   |                                   |                     |          |          |                            |                            |                      |                      |
|----|-----------------------------------------------------------------------------------------------------------------------------------------------------------------------------------------------------------------------|------|--------|--------------|------------------------------------------------------------------------|-----|----------------------------------------------------------|------------|-----------------------------------|-----------------------------------|---------------------|----------|----------|----------------------------|----------------------------|----------------------|----------------------|
| 1  | A. P. B. da Silva Etges, L. N. Cruz, R. Schlatter, J. Neyeloff, R. B. Cardoso, L. Koppik, A. A. Nunes, J. A. Neto, J. L. Nogueira, R. M. de Aguiar, J. S. D. Tobias, M. Dziemianowicz, J. Burneister and M. Dominello | 2022 | Brazil | Brazil       | multi center, retrospective, process mapping, 5 hospitals, 90 patients | 5   | Interventional Coronary Procedures                       | Cardiology | full care path (surgical episode) | Direct and indirect               | provider            | provider | TDABC    | Absorption costing - TDABC | unspecified                | yes see second sheet |                      |
| 2  |                                                                                                                                                                                                                       |      |        |              |                                                                        |     |                                                          |            |                                   |                                   |                     |          |          |                            |                            |                      |                      |
| 3  |                                                                                                                                                                                                                       |      |        |              |                                                                        |     |                                                          |            |                                   |                                   |                     |          |          |                            |                            |                      |                      |
| 4  |                                                                                                                                                                                                                       |      |        |              |                                                                        |     |                                                          |            |                                   |                                   |                     |          |          |                            |                            |                      |                      |
| 5  |                                                                                                                                                                                                                       |      |        |              |                                                                        |     |                                                          |            |                                   |                                   |                     |          |          |                            |                            |                      |                      |
| 6  |                                                                                                                                                                                                                       |      |        |              |                                                                        |     |                                                          |            |                                   |                                   |                     |          |          |                            |                            |                      |                      |
| 7  |                                                                                                                                                                                                                       |      |        |              |                                                                        |     |                                                          |            |                                   |                                   |                     |          |          |                            |                            |                      |                      |
| 8  | C. Fang, A. Hagar, M. Gordon, C. T. Talamo, D. A. Mattingly and E. L. Smith                                                                                                                                           | 2021 | US     | US; Michigan | single center, retrospective, patient comparison                       | 889 | Geriatrics, Orthopedic, Primary Total Joint Arthroplasty | Surgical   | Orthopedic fracture               | full care path (surgical episode) | Direct and indirect | provider | provider | TDABC                      | Absorption costing - TDABC | Paper only           | yes see second sheet |
| 9  |                                                                                                                                                                                                                       |      |        |              |                                                                        |     |                                                          |            |                                   |                                   |                     |          |          |                            |                            |                      |                      |
| 10 |                                                                                                                                                                                                                       |      |        |              |                                                                        |     |                                                          |            |                                   |                                   |                     |          |          |                            |                            |                      |                      |
| 11 |                                                                                                                                                                                                                       |      |        |              |                                                                        |     |                                                          |            |                                   |                                   |                     |          |          |                            |                            |                      |                      |
| 12 |                                                                                                                                                                                                                       |      |        |              |                                                                        |     |                                                          |            |                                   |                                   |                     |          |          |                            |                            |                      |                      |
| 13 |                                                                                                                                                                                                                       |      |        |              |                                                                        |     |                                                          |            |                                   |                                   |                     |          |          |                            |                            |                      |                      |
| 14 |                                                                                                                                                                                                                       |      |        |              |                                                                        |     |                                                          |            |                                   |                                   |                     |          |          |                            |                            |                      |                      |
| 15 |                                                                                                                                                                                                                       |      |        |              |                                                                        |     |                                                          |            |                                   |                                   |                     |          |          |                            |                            |                      |                      |
| 16 |                                                                                                                                                                                                                       |      |        |              |                                                                        |     |                                                          |            |                                   |                                   |                     |          |          |                            |                            |                      |                      |
| 17 |                                                                                                                                                                                                                       |      |        |              |                                                                        |     |                                                          |            |                                   |                                   |                     |          |          |                            |                            |                      |                      |
| 18 |                                                                                                                                                                                                                       |      |        |              |                                                                        |     |                                                          |            |                                   |                                   |                     |          |          |                            |                            |                      |                      |
| 19 |                                                                                                                                                                                                                       |      |        |              |                                                                        |     |                                                          |            |                                   |                                   |                     |          |          |                            |                            |                      |                      |
| 20 |                                                                                                                                                                                                                       |      |        |              |                                                                        |     |                                                          |            |                                   |                                   |                     |          |          |                            |                            |                      |                      |
| 21 |                                                                                                                                                                                                                       |      |        |              |                                                                        |     |                                                          |            |                                   |                                   |                     |          |          |                            |                            |                      |                      |
| 22 |                                                                                                                                                                                                                       |      |        |              |                                                                        |     |                                                          |            |                                   |                                   |                     |          |          |                            |                            |                      |                      |
| 23 |                                                                                                                                                                                                                       |      |        |              |                                                                        |     |                                                          |            |                                   |                                   |                     |          |          |                            |                            |                      |                      |
| 24 |                                                                                                                                                                                                                       |      |        |              |                                                                        |     |                                                          |            |                                   |                                   |                     |          |          |                            |                            |                      |                      |
| 25 |                                                                                                                                                                                                                       |      |        |              |                                                                        |     |                                                          |            |                                   |                                   |                     |          |          |                            |                            |                      |                      |
| 26 |                                                                                                                                                                                                                       |      |        |              |                                                                        |     |                                                          |            |                                   |                                   |                     |          |          |                            |                            |                      |                      |
| 27 |                                                                                                                                                                                                                       |      |        |              |                                                                        |     |                                                          |            |                                   |                                   |                     |          |          |                            |                            |                      |                      |
| 28 |                                                                                                                                                                                                                       |      |        |              |                                                                        |     |                                                          |            |                                   |                                   |                     |          |          |                            |                            |                      |                      |
| 29 |                                                                                                                                                                                                                       |      |        |              |                                                                        |     |                                                          |            |                                   |                                   |                     |          |          |                            |                            |                      |                      |
| 30 |                                                                                                                                                                                                                       |      |        |              |                                                                        |     |                                                          |            |                                   |                                   |                     |          |          |                            |                            |                      |                      |
| 31 |                                                                                                                                                                                                                       |      |        |              |                                                                        |     |                                                          |            |                                   |                                   |                     |          |          |                            |                            |                      |                      |
| 32 |                                                                                                                                                                                                                       |      |        |              |                                                                        |     |                                                          |            |                                   |                                   |                     |          |          |                            |                            |                      |                      |
| 33 |                                                                                                                                                                                                                       |      |        |              |                                                                        |     |                                                          |            |                                   |                                   |                     |          |          |                            |                            |                      |                      |
| 34 |                                                                                                                                                                                                                       |      |        |              |                                                                        |     |                                                          |            |                                   |                                   |                     |          |          |                            |                            |                      |                      |
| 35 |                                                                                                                                                                                                                       |      |        |              |                                                                        |     |                                                          |            |                                   |                                   |                     |          |          |                            |                            |                      |                      |
| 36 |                                                                                                                                                                                                                       |      |        |              |                                                                        |     |                                                          |            |                                   |                                   |                     |          |          |                            |                            |                      |                      |
| 37 |                                                                                                                                                                                                                       |      |        |              |                                                                        |     |                                                          |            |                                   |                                   |                     |          |          |                            |                            |                      |                      |
| 38 |                                                                                                                                                                                                                       |      |        |              |                                                                        |     |                                                          |            |                                   |                                   |                     |          |          |                            |                            |                      |                      |
| 39 |                                                                                                                                                                                                                       |      |        |              |                                                                        |     |                                                          |            |                                   |                                   |                     |          |          |                            |                            |                      |                      |
| 40 |                                                                                                                                                                                                                       |      |        |              |                                                                        |     |                                                          |            |                                   |                                   |                     |          |          |                            |                            |                      |                      |
| 41 |                                                                                                                                                                                                                       |      |        |              |                                                                        |     |                                                          |            |                                   |                                   |                     |          |          |                            |                            |                      |                      |
| 42 |                                                                                                                                                                                                                       |      |        |              |                                                                        |     |                                                          |            |                                   |                                   |                     |          |          |                            |                            |                      |                      |
| 43 |                                                                                                                                                                                                                       |      |        |              |                                                                        |     |                                                          |            |                                   |                                   |                     |          |          |                            |                            |                      |                      |
| 44 |                                                                                                                                                                                                                       |      |        |              |                                                                        |     |                                                          |            |                                   |                                   |                     |          |          |                            |                            |                      |                      |
| 45 |                                                                                                                                                                                                                       |      |        |              |                                                                        |     |                                                          |            |                                   |                                   |                     |          |          |                            |                            |                      |                      |
| 46 |                                                                                                                                                                                                                       |      |        |              |                                                                        |     |                                                          |            |                                   |                                   |                     |          |          |                            |                            |                      |                      |

|                                                                                                                                                                                                   |                                                                                                                                                                                               |      |        |                |                                                                                                    |                                           |                                                                          |                         |                                |                                   |                     |          |                                                       |                                          |                                          |                |                      |                      |
|---------------------------------------------------------------------------------------------------------------------------------------------------------------------------------------------------|-----------------------------------------------------------------------------------------------------------------------------------------------------------------------------------------------|------|--------|----------------|----------------------------------------------------------------------------------------------------|-------------------------------------------|--------------------------------------------------------------------------|-------------------------|--------------------------------|-----------------------------------|---------------------|----------|-------------------------------------------------------|------------------------------------------|------------------------------------------|----------------|----------------------|----------------------|
| H. Ko, D. S. Brodtk, M. E. Vanneman, A. J. Schoenfeld and B. I. Martin                                                                                                                            | Is Discretionary Care Associated with Safety Among Medicare Beneficiaries Undergoing Spine Surgery?                                                                                           | 2021 | US     | US; various    |                                                                                                    | spine surgery, surgical                   | Surgical                                                                 | Spine                   | partial care path              | Direct and indirect               | payer               | payer    | none; reimbursements                                  | Charges/Reimbursements-based             | N/A                                      | reimbursements | no                   |                      |
| S. R. Konda, J. R. Johnson, N. Dethia, E. A. Kelly and K. A. Egol                                                                                                                                 | Can We Stratify Quality and Cost for Older Patients With Proximal and Midshaft Humerus Fractures?                                                                                             | 2021 | US     | US; various    |                                                                                                    | Humerus Fractures, geriatrics, orthopedic | Surgical                                                                 | Orthopedic fracture     | unspecified                    | Direct                            | provider            | provider | direct variable costs as an estimation of total costs | Direct costing                           | N/A                                      |                | no                   |                      |
| A. T. Malik, S. N. Khan, R. T. Voskuil, J. H. Alexander, J. P. Drain and T. J. Scharschmidt                                                                                                       | What Is the Value of Undergoing Surgery for Spinal Metastases at Dedicated Cancer Centers?                                                                                                    | 2021 | US     | US; various    |                                                                                                    | Orthopedic, spine surgery                 | Oncology                                                                 |                         | partial care path              | Direct and indirect               | payer               | payer    | none; reimbursements                                  | Charges/Reimbursements-based             | N/A                                      | reimbursements | no                   |                      |
| T. R. McClintock, D. F. Friedlander, A. Y. Feng, M. A. Shah, D. J. Pallin, S. L. Chang, A. M. Bader, T. W. Feeley, R. S. Kaplan and G. E. Lathrop                                                 | Determining Variable Costs in the Acute Urolithiasis Cycle of Care Through Time-Driven Activity-Based Costing                                                                                 | 2021 | US     | US; Boston     | multi center, retrospective, process mapping, unspecified number of patients, acute stone episodes | Acute Urolithiasis                        | emergency care & acute care                                              |                         | full care path                 | Direct and indirect               | provider            | provider | TDABC                                                 | Absorption costing - TDABC               | unspecified                              |                | yes see second sheet |                      |
| R. Negrini, R. D. da Silva Ferreira and D. Z. Guimaraes                                                                                                                                           | Value-based care in obstetrics: comparison between vaginal birth and caesarean section                                                                                                        | 2021 | Brazil | Brazil         | single center, retrospective, process mapping                                                      | 9345 deliveries                           | Obstetrics, birth, vaginal birth, caesarean birth                        | gynecology & obstetrics | full care path                 | Direct and indirect               | provider            | provider | direct and indirect costs                             | Absorption costing - unspecified/generic | Paper only                               |                | yes see second sheet |                      |
| T. V. Newman, K. D. Munshi, L. M. Neilson, C. B. Good, E. C. S. Swart, Y. Huang, R. Henderson and N. Parekh                                                                                       | Health care utilization and costs associated with switching from DPP-4i to GLP-1RA or SGLT2: an observational cohort study                                                                    | 2021 | US     | US; various    |                                                                                                    | Diabetes                                  | Internal Medicine                                                        |                         | partial care path              | Direct and indirect               | payer               | payer    | none; charges                                         | Charges/Reimbursements-based             | N/A                                      | charges        | no                   |                      |
| N. Panda, L. Shagabayeva, C. E. Comrie, N. Phan, P. Moonssamy, C. F. Jeffrey Yang, F. G. Fernandez and C. R. Moore                                                                                | Drivers of Cost Associated With Minimally Invasive Esophagectomy                                                                                                                              | 2022 | US     | US; Boston     |                                                                                                    | esophagectomy, surgical, thoracic surgery | Surgical                                                                 | Cardiac/Thoracic        | full care path                 | Direct                            | provider            | provider | direct costs                                          | Direct costing                           | N/A                                      |                | no                   |                      |
| S. K. Pasquall, D. Thibault, M. Hall, K. Chiswell, J. C. Romano, J. W. Gaynor, D. M. Shahian, M. L. Jacobs, M. G. Gales, S. M. Glickson, R. K. Sethi, R. P. Pumpian, C. E. Drolet and P. K. Louie | Evolving Cost-Quality Relationship in Pediatric Heart Surgery                                                                                                                                 | 2021 | US     | US; Boston     | Retrospective, multi-center                                                                        | 45315 patients, 32 hospitals              | pediatrics, surgical, pediatric heart surgery                            | Pediatrics              | Pediatric surgical             | full care path                    | direct and indirect | provider | provider                                              | CHD-method standardized costs            | Absorption costing - unspecified/generic | Paper only     |                      | no                   |
| N. G. Thaker, D. Boyce-Fappiano, M. S. Ning, D. Pasalic, A. Guzman, G. Smith, E. B. Holliday, J. Incalcaterra, A. S. Gaudan, S. P. S. Tomicki, G. Dieguez, H. Latimer, P. Cockrum and G. Kim      | Utilizing Lean Methodology and Time-Driven Activity-Based Costing Together: An Observational Pilot Study of Hip Replacement Surgery Utilizing a New Method to Study Value-Based Health Care   | 2021 | US     | US; Washington | single center, retrospective, surgeon comparison                                                   | 346 patients                              | surgical, orthopedic, hip replacement surgery, anterior hip arthroplasty | Surgical                | Orthopedic, arthroplasty       | full care path (surgical episode) | Direct and indirect | provider | provider                                              | TDABC                                    | Absorption costing - TDABC               | Paper only     |                      | yes see second sheet |
| W. Wang, E. Li, K. Campbell, A. McBride and S. D'Amato                                                                                                                                            | Activity-Based Costing of Intensity-Modulated Proton versus Photon Therapy for Oropharyngeal Cancer                                                                                           | 2021 | US     | US; Texas      | single center, process mapping, matched sample                                                     | 50 patients (matched pairs)               | oncology, radiation oncology                                             | Oncology                |                                | partial care path                 | Direct and indirect | provider | provider                                              | TDABC                                    | Absorption costing - TDABC               | implemented    |                      | yes see second sheet |
| K. L. Wise, H. R. Parikh, B. Okelana, A. J. Only, M. Reams, A. Harrison, J. Braman, E. Craig and B. P. Cunningham                                                                                 | Real-World Cost of Care for Commercially Insured versus Medicare Patients with Metastatic Pancreatic Cancer Who Received Guideline-Recommended Therapies                                      | 2021 | US     | US; various    |                                                                                                    | oncology, metastatic pancreatic cancer    | Oncology                                                                 |                         | full care path                 | Direct and indirect               | payer               | payer    | none; charges                                         | Charges/Reimbursements-based             | N/A                                      | charges        | no                   |                      |
| W. Wang, E. Li, K. Campbell, A. McBride and S. D'Amato                                                                                                                                            | Economic Analysis on Adoption of Biosimilar Granulocyte Colony-Stimulating Factors in Patients With Nonmyeloid Cancer at Risk of Febrile Neutropenia Within the Oncology Care Model Framework | 2021 | US     | US; New Jersey |                                                                                                    | oncology, Nonmyeloid Cancer               | Oncology                                                                 |                         | partial care path              | Direct                            | provider            | provider | direct costs                                          | Direct costing                           | N/A                                      |                | no                   |                      |
| K. L. Wise, H. R. Parikh, B. Okelana, A. J. Only, M. Reams, A. Harrison, J. Braman, E. Craig and B. P. Cunningham                                                                                 | Measurement of value in rotator cuff repair: patient-level value analysis for the 1-year episode of care                                                                                      | 2022 | US     | US; Minnesota  | single center, retrospective, process mapping                                                      | 396 patients                              | orthopedic, surgical, rotator cuff repair                                | Surgical                | Orthopedic rotator cuff repair | full care path                    | Direct and indirect | provider | provider                                              | TDABC                                    | Absorption costing - TDABC               | unspecified    |                      | yes see second sheet |
| C. Iloabachi, N. Dwibedi, T. LeMasters, C. Shen, A. Ladani and U. Sambamoorthi                                                                                                                    | Low-value care and excess out-of-pocket expenditure among older adults with incident cancer – A machine learning approach                                                                     | 2021 | US     | US; various    |                                                                                                    | oncology, incident cancer                 | Oncology                                                                 |                         | full care path                 | Direct                            | patient             | patient  | total out of pocket expenditures (SEER data)          | Charges/Reimbursements-based patient OoO | N/A                                      |                | no                   |                      |

|                                                                                                                                                                              |                                                                                                                                                            |      |           |                    |                                                                 |                                                                |                                                                                      |                             |                          |                     |                     |                  |                                                      |                                       |                                           |                                                |                      |                      |
|------------------------------------------------------------------------------------------------------------------------------------------------------------------------------|------------------------------------------------------------------------------------------------------------------------------------------------------------|------|-----------|--------------------|-----------------------------------------------------------------|----------------------------------------------------------------|--------------------------------------------------------------------------------------|-----------------------------|--------------------------|---------------------|---------------------|------------------|------------------------------------------------------|---------------------------------------|-------------------------------------------|------------------------------------------------|----------------------|----------------------|
| N. Seyidova, A. D. Chen, D. del Valle, D. Chi, R. P. Casley, B. T. Lee and S. J. Lin                                                                                         | Nationwide cost variation for lower extremity flap reconstruction                                                                                          | 2021 | US        | US; various        |                                                                 | lower extremity flap reconstruction, surgical, plastic surgery | Surgical                                                                             | Plastic surgery             | full care path           | Direct and indirect | provider (proxy)    | payer            | none; charges, transformed with cost-to-charge ratio | Charges/Reimbursement t-based proxy   | N/A                                       | charges, transformed with cost-to-charge ratio | no                   |                      |
| A. Jacir, D. Mendoza, E. Dean and H. Gritlow                                                                                                                                 | The cost of care during times of COVID: Case study of TDABC and minimum utilization cost analysis in a medicare advantage population                       | 2021 | US        | US; Florida        | single center, process mapping, case study                      | case study, telehealth visits                                  | Covid                                                                                | Infectious disease          | full care path           | Direct and indirect | provider            | provider         | TDABC                                                | Absorption costing - TDABC            | unspecified                               |                                                | no                   |                      |
| D. Fürstenau, H. Hanke, C. Spies, T. Walz, K. Schewina, M. Hüft, R. Müggeli and F. Balzer                                                                                    | Tackling the frailty burden with an integrative value-based approach: results from a mixed-methods study                                                   | 2021 | Germany   | Germany            |                                                                 |                                                                | surgical, perioperative process                                                      | Surgical                    | other                    | partial care path   | unspecified         | provider         | provider                                             | bottom-up clinical costing approach   | Unspecified                               | N/A                                            | no                   |                      |
| J. F. Buehl, A. N. Flaris, S. Raju, A. Haach, M. Darden and G. G. Parker                                                                                                     | Long-Term Outcomes in Complex Abdominal Wall Reconstruction Repaired with Absorbable Biologic Polymer Scaffold (Poly-4-Hydroxybutyrate)                    | 2021 | US        | US; North Carolina |                                                                 |                                                                | Surgical, abdominal wall reconstruction, reherniation, complex abdominal wall hernia | Surgical                    | Abdominal                | partial care path   | Direct              | payer            | payer                                                | none; charges                         | Charges/Reimbursement t-based             | N/A                                            | no                   |                      |
| V. J. Siu, T. Varkey, U. N. Khan, J. B. Ding and S. Gandhi                                                                                                                   | Lend Me a Hand: A Value-Based Care Case Study on Pan Plexopathy of Unknown Origin                                                                          | 2021 | US        | US; Texas          |                                                                 |                                                                | pan plexopathy, neurology, brachial plexus injury                                    | Neurology                   |                          | unspecified         | Direct              | patient          | patient                                              | out of pocket costs to patient        | Charges/Reimbursement t-based patient O&O | N/A                                            | no                   |                      |
| J. B. Kulejca, M. A. Seif, M. W. Mery, J. R. Incalcaterra, A. M. Kamat, C. P. Dinney, J. B. Shah, T. W. Feeley and N. Navai                                                  | Utilizing time-driven activity-based costing to determine open radical cystectomy and ileal conduit surgical episode cost drivers                          | 2021 | US        | US; Texas          | single center, retrospective, process mapping                   | 100 patients                                                   | open radical cystectomy, urology, oncology, bladder cancer                           | Oncology                    |                          | full care path      | Direct and indirect | provider         | provider                                             | TDABC                                 | Absorption costing - TDABC                | Paper only                                     | yes see second sheet |                      |
| King, B. C. Richardson, T. Patel, R. M. Lee, H. C. Bamat, N. A. Hall, M. Schabas, L. L. L. Fernando-Campan, A. Gust, A. Hsueh, A. Tran-Duy, M. Kirk, P. Brooks and J. Knight | Prioritization framework for improving the value of care for very low birth weight and very preterm infants                                                | 2021 | US        | US; Texas          | Retrospective cohort, multi center                              | 26098 preterm or low birth weight infants                      | Preterm infants, neonatal, perinatology, pediatrics                                  | Pediatrics                  | Pediatric Neonatal       | partial care path   | Direct and indirect | payer            | payer                                                | charges standardized across hospitals | Charges/Reimbursement t-based             | N/A                                            | charges              | no                   |
| H. Skibicki, M. Yayac, C. A. Krueger and P. M. Courtney                                                                                                                      | Target Price Adjustment for Hip Fractures Is Not Sufficient in the Bundled Payments for Care Improvement Initiative                                        | 2021 | Australia | Australia          | single center, retrospective, mixed methods observational study | 93 056 cases                                                   | emergency care, hospital acquired complications                                      | emergency care & acute care |                          | partial care path   | Direct and indirect | provider         | provider                                             | bottom-up clinical costing approach   | Absorption costing - unspecified/generic  | unspecified                                    |                      | yes see second sheet |
| D. Clewley, V. Iftikhar, M. E. Horn and D. I. Rhon                                                                                                                           | Do the Number of Visits and the Cost of Musculoskeletal Care Improve Outcomes? More May Not Be Better                                                      | 2020 | US        | US; Pennsylvania   |                                                                 |                                                                | arthroplasty, hip fractures, orthopedics                                             | Surgical                    | Orthopedic, arthroplasty | full care path      | Direct and indirect | payer            | payer                                                | none; charges                         | Charges/Reimbursement t-based             | N/A                                            | charges (EOC costs)  | no                   |
| B. Walker, L. Wilfong, J. Frytak and N. Robert                                                                                                                               | Practice patterns among oncologists participating in the oncology care model after three years                                                             | 2021 | US        | US; Louisiana      | Retrospective, clinical trial                                   | 98 patients                                                    | Subacromial pain syndrome                                                            | Pain medicine               |                          | partial care path   | Direct and indirect | payer            | payer                                                | none; reimbursements                  | Charges/Reimbursement t-based             | N/A                                            | reimbursements       | no                   |
| C. A. Krueger, M. Yayac, C. Vannello, J. Wilsman, M. S. Austin and P. M. Courtney                                                                                            | Are We at the Bottom? BPCI Programs Now Disincentivize Providers Who Maintain Quality Despite Caring for Increasingly Complex Patients                     | 2021 | US        | US; Pennsylvania   |                                                                 |                                                                | oncology, cancer                                                                     | Oncology                    |                          | full care path      | Direct and indirect | payer            | payer                                                | none; charges                         | Charges/Reimbursement t-based             | N/A                                            | charges              | no                   |
| B. S. Horton, J. D. Marland, H. S. West and J. D. Wylie                                                                                                                      | Transition to Telehealth Physical Therapy After Hip Arthroscopy for Femoroacetabular Impingement: A Pilot Study With Retrospective Matched-Cohort Analysis | 2021 | US        | US; Utah           | Pilot                                                           |                                                                | orthopedic, total hip arthroplasty, total knee arthroplasty                          | Surgical                    | Orthopedic, arthroplasty | partial care path   | Direct and indirect | payer            | payer                                                | none; reimbursement                   | Charges/Reimbursement t-based             | N/A                                            | reimbursement        | no                   |
| N. H. Nguyen, J. Luo, L. Ohno-Machado, W. J. Sandborn and S. Singh                                                                                                           | Burden and Outcomes of Fragmentation of Care in Hospitalized Patients With Inflammatory Bowel Diseases: A Nationally Representative Cohort                 | 2021 | US        | US; California     |                                                                 |                                                                | orthopedics, hip arthroscopy, physical therapy                                       | Orthopedic                  |                          | partial care path   | Direct and indirect | payer            | payer                                                | none; charges                         | Charges/Reimbursement t-based             | N/A                                            | charges              | no                   |
|                                                                                                                                                                              |                                                                                                                                                            |      |           |                    |                                                                 |                                                                | Gastroenterology, Inflammatory Bowel Diseases                                        | Internal Medicine           |                          | full care path      | Direct and indirect | provider (proxy) | payer                                                | none; charges HCUP data               | Charges/Reimbursement t-based             | N/A                                            | charges              | no                   |

|   |                                                                                                                         |                                                                                                                               |      |                 |                 |                                                                    |                                                 |                                                             |                  |                |                                           |                     |          |                                                   |                                    |                                          |                                               |                      |
|---|-------------------------------------------------------------------------------------------------------------------------|-------------------------------------------------------------------------------------------------------------------------------|------|-----------------|-----------------|--------------------------------------------------------------------|-------------------------------------------------|-------------------------------------------------------------|------------------|----------------|-------------------------------------------|---------------------|----------|---------------------------------------------------|------------------------------------|------------------------------------------|-----------------------------------------------|----------------------|
| 1 | Y. Sanaia, P. Downey,<br>R. Lyons, A. Nsaif, R.<br>J. Shemin and P.<br>Benharash                                        | Trends in utilization, mortality, and resource use after implantation of left ventricular assist devices in the United States | 2021 | US              | US; various     |                                                                    | cardiovascular, left ventricular assist devices | Surgical                                                    | Cardiac/Thoracic | full care path | Direct and indirect                       | provider (proxy)    | payer    | none; reimbursements, cost-charge-ratio, NIS data | Charges/Reimbursements-based proxy | N/A                                      | charges transformed with cost-to-charge ratio | no                   |
| 2 | Khanjow, A. N.<br>Wood, L. N.<br>Xie, R.<br>Theiss, L. M.<br>Hollis, R. H.<br>Hardiman, K. M.<br>Gonzalez, D. J.        | The impact of an enhanced recovery program (ERP) on the costs of colorectal surgery                                           | 2021 | US              | US; Alabama     | single center, retrospective                                       | 616 surgical cases                              | surgical, colorectal surgery                                | Surgical         | Colon/Rectal   | partial care path (full surgical episode) | Direct and indirect | provider | provider                                          | unspecified                        | Absorption costing - unspecified/generic | Paper only                                    | yes see second sheet |
| 3 | Jacobs, K.<br>Dewilde, T.<br>Vandoren, C.<br>Cardoen, B.<br>Vansteenkiste, N.<br>Scheys, L.<br>Roelofs, F.<br>Matar, D. | Variability in Hospital Costs of Adult Spinal Deformity Care                                                                  | 2020 | The Netherlands | The Netherlands | single center, retrospective                                       | 139 patients                                    | Surgical, spine, Adult Spinal Deformity                     | Surgical         | Spine          | full care path                            | Direct              | provider | provider                                          | ABC (excluding overheads)          | Absorption costing - ABC                 | Paper only                                    | yes see second sheet |
| 4 | Di Filippo, A.<br>Invento, A.<br>Radice, D.<br>Bucuta, M.<br>Bignardi, V.<br>Mazzanti, E.<br>Weir, T. B.                | Economic implications of ACOSOG Z0011 trial application into clinical practice at the European Institute of Oncology          | 2021 | Italy           | Italy           | single center, retrospective, clinical trial, compare pre and post | 3912 patients                                   | oncology, breast cancer, cancer, sentinel lymph node biopsy | Oncology         |                | partial care path (full surgical episode) | Direct and indirect | provider | provider                                          | TDABC                              | Absorption costing - TDABC               | implemented                                   | yes see second sheet |
| 5 | Usmani, M. F.<br>Camacho, J.<br>Sokolow, M.<br>Bruckner, J.<br>Jazini, E.<br>Lorenzini, L. T.                           | Effect of Surgical Setting on Cost and Hospital Reported Outcomes for Single-Level Anterior Cervical Discectomy and Fusion    | 2021 | US              | US; Maryland    | multi center, retrospective                                        | 301 patients                                    | Spine, surgical, Anterior Cervical Discectomy and Fusion    | Surgical         | Spine          | full care path                            | Direct and indirect | provider | provider                                          | unspecified                        | Absorption costing - unspecified/generic | Paper only                                    | no                   |

Peer review only



1  
2  
3  
4  
5  
6  
7  
8  
9  
10  
11  
12  
13  
14  
15  
16  
17  
18  
19  
20  
21  
22  
23  
24  
25  
26  
27  
28  
29  
30  
31  
32  
33  
34  
35  
36  
37  
38  
39  
40  
41  
42  
43  
44  
45  
46  
47  
48  
49  
50  
51  
52  
53  
54  
55  
56  
57  
58  
59  
60

For peer review only

## SUPPLEMENT DIGITAL CONTENT

### 1 Search strategy

2003-1/1/2022

#### embase.com

(((value-based OR valuebased) NOT ((value-based OR valuebased) NEXT/2 (insuran\* OR purchas\* OR pric\* OR reimburse\* OR contract\* OR payment\* OR partnership\*)) OR vbhc OR vb-hc):ab,ti) AND ('cost'/de OR 'health care cost'/de OR 'time driven activity based costing'/de OR 'activity based costing'/de OR (cost OR costs OR costing OR microcosting OR macrocosting OR tdabc OR abc OR (resource NEAR/3 assignment\*) OR (direct\* NEAR/3 estimat\*)):ab,ti) NOT (cost NEXT/1 (eval\* OR benefit\* OR effectiv\* OR utilit\* OR consequen\* OR minimi\* OR outcome\* OR reduc\* OR saving\*)):ti NOT [conference abstract]/lim AND ([dutch]/lim OR [English]/lim)

#### Medline Ovid

(((value-based OR valuebased) NOT ((value-based OR valuebased) ADJ2 (insuran\* OR purchas\* OR pric\* OR reimburse\* OR contract\* OR payment\* OR partnership\*)) OR vbhc OR vb-hc).ab,ti.) AND ("Costs and Cost Analysis"/ OR Health Care Costs/ OR (cost OR costs OR costing OR microcosting OR macrocosting OR tdabc OR abc OR (resource ADJ3 assignment\*) OR (direct\* ADJ3 estimat\*)):ab,ti.) NOT (cost ADJ (eval\* OR benefit\* OR effectiv\* OR utilit\* OR consequen\* OR minimi\* OR outcome\* OR reduc\* OR saving\*)):ti. AND (dutch.la. OR english.la.)

#### CINAHL EBSCOhost

(((TI(value-based OR valuebased) OR AB (value-based OR valuebased)) NOT (TI((value-based OR valuebased) N2 (insuran\* OR purchas\* OR pric\* OR reimburse\* OR contract\* OR payment\* OR partnership\*)) OR AB((value-based OR valuebased) N2 (insuran\* OR purchas\* OR pric\* OR reimburse\* OR contract\* OR payment\* OR partnership\*))) OR TI(vbhc OR vb-hc) OR AB(vbhc OR vb-hc))) AND ((MH "Costs and Cost Analysis" OR MH Health Care Costs OR MH Value-Based Health Care OR AB(costing OR microcosting OR macrocosting OR tdabc OR abc OR (resource N2 assignment\*) OR (direct\* N2 estimat\*))) OR (TI(cost OR costs) NOT TI(cost N1 (eval\* OR benefit\* OR effectiv\* OR utilit\* OR consequen\* OR minimi\* OR outcome\* OR reduc\* OR saving\*)))) AND LA(dutch OR english)

#### Web of science

TS=(((value-based OR valuebased) NOT ((value-based OR valuebased) NEAR/2 (insuran\* OR purchas\* OR pric\* OR reimburse\* OR contract\* OR payment\* OR partnership\*)) OR vbhc OR vb-hc)) AND ((cost OR costs OR costing OR microcosting OR macrocosting OR tdabc OR abc OR (resource NEAR/2 assignment\*) OR (direct\* NEAR/2 estimat\*))) AND (care OR health\* OR medicine OR clinical OR hospital\* OR surger\* OR therap\* OR patient\* OR oncolog\* OR drugs OR medication\* OR cancer\* OR pharmac\*) NOT TI=(cost NEAR/1 (eval\* OR benefit\* OR effectiv\* OR utilit\* OR consequen\* OR minimi\* OR outcome\* OR reduc\* OR saving\*)) AND DT=(article) AND LA=(dutch OR english)

## SUPPLEMENT DIGITAL CONTENT

### 2 Inclusion/exclusion criteria, data extracted

#### *Eligibility criteria*

|                   |                                                                                                                    |
|-------------------|--------------------------------------------------------------------------------------------------------------------|
| Language          | English or Dutch                                                                                                   |
| Publication date  | Between 2003 and 1.1.2022                                                                                          |
| Research type     | Original, peer-reviewed, empirical research                                                                        |
| Terms             | Any variation of the terms “cost” and “value-based” in title or abstract                                           |
| Full text content | Costs of an intervention, treatment, care path, or other healthcare activity must have been measured or estimated. |

#### *Variables collected*

|                        |                                                                                                                                                                                                                                                                                                                                                                                                                                                                                                                                                             |
|------------------------|-------------------------------------------------------------------------------------------------------------------------------------------------------------------------------------------------------------------------------------------------------------------------------------------------------------------------------------------------------------------------------------------------------------------------------------------------------------------------------------------------------------------------------------------------------------|
| Descriptive            | Name, year published, authors, medical specialty, location                                                                                                                                                                                                                                                                                                                                                                                                                                                                                                  |
| Costs included         | Based on author reporting we classify studies into one of two categories: <ul style="list-style-type: none"> <li>• Direct costs only</li> <li>• Direct and indirect costs</li> </ul>                                                                                                                                                                                                                                                                                                                                                                        |
| Cost perspective       | We inductively classify studies into one or more categories: <ul style="list-style-type: none"> <li>• Provider costs (e.g. hospital)</li> <li>• Payer costs (reimbursements, charges, payments)</li> <li>• Patient costs (out-of-pocket costs to patient)</li> </ul>                                                                                                                                                                                                                                                                                        |
| Care path length       | We inductively classify studies into one of the following categories: <ul style="list-style-type: none"> <li>• Full care path</li> <li>• Full care path, full surgical episode (FSE)</li> <li>• Partial care path, full surgical episode (PSE)</li> <li>• Partial care path</li> </ul>                                                                                                                                                                                                                                                                      |
| Costing method label   | Costing method used, as labelled by the authors. These include traditional cost accounting, ABC, or ABC excluding overheads, TDABC, or TDABC with some cost categories omitted, microcosting, bottom-up clinical costing, reference pricing, relative value units or DRG costs, direct variable costs, or direct costs as an estimate of total cost, reimbursements, charges, claims, payments, and cost-to-charge ratio.                                                                                                                                   |
| Costing method applied | Costing method applied, based on method described by authors. We classified studies using management accounting literature (e.g., Zimmerman, 2015). We found the following categories represented in the literature. <ul style="list-style-type: none"> <li>• Direct costing</li> <li>• Absorption costing, which includes: <ul style="list-style-type: none"> <li>○ ABC</li> <li>○ TDABC.</li> <li>○ Other</li> </ul> </li> </ul> <p>Cases using reimbursements or charges to estimate costs were coded as ‘reimbursements’ or ‘cost-to-charge ratio’.</p> |
| Facilitating factors   | If the study discussed the consequences of the costing information generated, we collected the consequences. After we collected all consequences, we categorized these inductively.                                                                                                                                                                                                                                                                                                                                                                         |

*Note:* ABC: Activity-based costing; TDABC: Time-driven activity-based costing

**Supplement digital content table 1.** Eligibility criteria and data collected.



## SUPPLEMENT DIGITAL CONTENT

### 3 All studies included in RQ1

| Perspective     | Method                                     | n  | studies               |
|-----------------|--------------------------------------------|----|-----------------------|
| <i>Provider</i> | Direct costs only                          |    |                       |
|                 | Direct costing                             | 23 | [1–23]                |
|                 | Absorption costing                         |    |                       |
|                 | ABC                                        | 7  | [24–30]               |
|                 | TDABC                                      | 31 | [31–61]               |
|                 | Other                                      | 47 | [62–108]              |
|                 | Not specified                              | 3  | [109–111]             |
| <i>Insurer</i>  | Charges & reimbursements                   |    |                       |
|                 | Charges, reimbursements, claims            | 81 | [23,39,112–190]       |
|                 | Charges adjusted with cost-to charge ratio | 25 | [108,191–214]         |
| <i>Patient</i>  | Out-of-pocket costs to patient             | 5  | [106,126,130,215,216] |

*Note:* Total number of studies here is 222; seven studies measure two cost types[23,38,39,106,108,126,130]. Studies are classified based on actual costs included and methods described, not necessarily the labels used by authors.

**Supplement digital content table 2.** Overview of cost measurement methods used in value-based healthcare with references

#### References of all studies included in research question 1

*Reference numbers start at 1, these differ from the manuscript.*

- 1 Chatfield SC, Volpicelli FM, Adler NM, *et al.* Bending the cost curve: Time series analysis of a value transformation programme at an academic medical centre. *BMJ Qual Saf* 2019;**28**:449–58.
- 2 Featherall J, Brigati DP, Arney AN, *et al.* Effects of a Total Knee Arthroplasty Care Pathway on Cost, Quality, and Patient Experience: Toward Measuring the Triple Aim. *J Arthroplasty* 2019;**34**:2561–8.
- 3 Karns MR, Jones DL, Todd DC, *et al.* Patient- and Procedure-Specific Variables Driving Total Direct Costs of Outpatient Anterior Cruciate Ligament Reconstruction. *Orthop J Sports Med* 2018;**6**:2325967118788543.
- 4 Tan RYC, Met-Domestici M, Zhou K, *et al.* Using quality improvement methods and time-driven activity-based costing to improve value-based cancer care delivery at a Cancer Genetics clinic. *J Oncol Pract* 2016;**12**:e320–31.
- 5 Ravikumar TS, Sharma C, Marini C, *et al.* A validated value-based model to improve hospital-wide perioperative outcomes: Adaptability to combined medical/surgical inpatient cohorts. *Ann Surg* 2010;**252**:486–96.

- 6 Fortmann AL, Walker C, Barger K, *et al.* Care Team Integration in Primary Care Improves One-Year Clinical and Financial Outcomes in Diabetes: A Case for Value-Based Care. *Popul Health Manag* 2020;**23**:467–75.
- 7 Ryan SP, Plate JF, Black CS, *et al.* Value-Based Care Has Not Resulted in Biased Patient Selection: Analysis of a Single Center’s Experience in the Care for Joint Replacement Bundle. *J Arthroplasty* 2019;**34**:1872–5.
- 8 Plate JF, Ryan SP, Black CS, *et al.* No Changes in Patient Selection and Value-Based Metrics for Total Hip Arthroplasty After Comprehensive Care for Joint Replacement Bundle Implementation at a Single Center. *J Arthroplasty* 2019;**34**:1581–4.
- 9 Jakovljevic M, Zugic A, Rankovic A, *et al.* Radiation therapy remains the key cost driver of oncology inpatient treatment. *J Med Econ* 2015;**18**:29–36.
- 10 Siu A, Patel J, Prentice HA, *et al.* A Cost Analysis of Regional Versus General Anesthesia for Carotid Endarterectomy. *Ann Vasc Surg* 2017;**39**:189–94.
- 11 Monroe GR, Frederix GW, Savelberg SMC, *et al.* Effectiveness of whole-exome sequencing and costs of the traditional diagnostic trajectory in children with intellectual disability. *Genet Med* 2016;**18**:949–56.
- 12 Lott A, Haglin J, Saleh H, *et al.* Using a Validated Middle-Age and Geriatric Risk Tool to Identify Early (<48 Hours) Hospital Mortality and Associated Cost of Care. *J Orthop Trauma* 2018;**32**:349–53.
- 13 Reilly CA, Doughty HP, Werth PM, *et al.* Creating a Value Dashboard for Orthopaedic Surgical Procedures. *J Bone Joint Surg Am* 2020;**102**:1849–56.
- 14 Konda SR, Lott A, Egol KA. The Coming Hip and Femur Fracture Bundle: A New Inpatient Risk Stratification Tool for Care Providers. *Geriatr Orthop Surg Rehabil* 2018;**9**:215145931879531.
- 15 Cremins M, Vellanky S, McCann G, *et al.* Considering healthcare value and associated risk factors with postoperative urinary retention after elective laminectomy. *Spine J* 2020;**20**:701–7.
- 16 Edholm K, Lappé K, Kukhareva P, *et al.* Reducing Diabetic Ketoacidosis Intensive Care Unit Admissions Through an Electronic Health Record-Driven, Standardized Care Pathway. *J Healthc Qual* 2020;**42**:e66–74.
- 17 Keating CL, Dixon JB, Moodie ML, *et al.* Cost-Efficacy of Surgically Induced Weight Loss for the Management of Type 2 Diabetes A randomized controlled trial. *Diabetes Care* 2009;**32**:580–4.
- 18 Feizpour CA, Patel, Syed MA, *et al.* Enhanced recovery in liver transplantation: A value-based approach to complex surgical care. *Surgery* 2021;**170**:1830–7.

- 19 Gillis HC, Dolan K, Sargel CL, *et al.* A quality improvement approach to influence value-based mucolytic use in the PICU. *Pediatr Qual Saf* 2021;**6**:e438.
- 20 Konda SR, Johnson JR, Dedhia N, *et al.* Can We Stratify Quality and Cost for Older Patients With Proximal and Midshaft Humerus Fractures? *Geriatr Orthop Surg Rehabil* 2021;**12**:2151459321992742.
- 21 Panda N, Shagabayeva L, Comrie CE, *et al.* Drivers of Cost Associated With Minimally Invasive Esophagectomy. *Ann Thorac Surg* 2022;**113**:264–70.
- 22 Wang W, Li E, Campbell K, *et al.* Economic analysis on adoption of biosimilar granulocyte colony-stimulating factors in patients with nonmyeloid cancer at risk of febrile neutropenia within the Oncology Care Model framework. *JCO Oncol Pract* 2021;**17**:e1139–49.
- 23 Gray CF, Prieto HA, Deen JT, *et al.* Bundled Payment Creep: Institutional Redesign for Primary Arthroplasty Positively Affects Revision Arthroplasty. *J Arthroplasty* 2019;**34**:206–10.
- 24 Wise, Blaschke BL, Parikh HR, *et al.* Variation of the Inpatient Cost of Care in the Treatment of Isolated Geriatric Intertrochanteric Hip Fractures. *Geriatr Orthop Surg Rehabil* 2020;**11**. doi:10.1177/2151459320976533
- 25 McLaughlin N, Upadhyaya P, Buxey F, *et al.* Value-based neurosurgery: measuring and reducing the cost of microvascular decompression surgery. *J Neurosurg* 2014;**121**:700–8.
- 26 Abbott MM, Meara JG. A microcosting approach for isolated, unilateral cleft lip care in the first year of life. *Plast Reconstr Surg* 2011;**127**:333–9.
- 27 McLaughlin N, Martin NA, Upadhyaya P, *et al.* Assessing the cost of contemporary pituitary care. *Neurosurg Focus* 2014;**37**:E7.
- 28 Vanni F, Foglia E, Pennestrì F, *et al.* Introducing enhanced recovery after surgery in a high-volume orthopaedic hospital: a health technology assessment. *BMC Health Serv Res* 2020;**20**:773.
- 29 Jacobs K, Dewilde T, Vandoren C, *et al.* Variability in hospital costs of Adult Spinal Deformity care. *Spine* 2020;**45**:1221–8.
- 30 Kaul S, Korgenski EK, Ying J, *et al.* A retrospective analysis of treatment-related hospitalization costs of pediatric, adolescent, and young adult acute lymphoblastic leukemia. *Cancer Med* 2016;**5**:221–9.
- 31 Etges, Cruz LN, Schlatter R, *et al.* Time-driven activity-based costing as a strategy to increase efficiency: An analyses of interventional coronary procedures. *Int J Health Plann Manage* Published Online First: 9 September 2021. doi:10.1002/hpm.3320
- 32 Martin JA, Mayhew CR, Morris AJ, *et al.* Using Time-Driven Activity-Based Costing as a Key Component of the Value Platform: A Pilot Analysis of Colonoscopy, Aortic Valve Replacement and Carpal Tunnel Release Procedures. *J Clin Med Res* 2018;**10**:314–20.

- 1  
2  
3 33 Bodar YJL, Srinivasan AK, Shah AS, *et al.* Time-Driven activity-based costing identifies opportunities for process efficiency and cost optimization for robot-assisted laparoscopic pyeloplasty. *J Pediatr Urol* 2020;**16**:460.e1-460.e10.
- 4  
5  
6  
7  
8 34 French KE, Guzman AB, Rubio AC, *et al.* Value based care and bundled payments: Anesthesia care costs for outpatient oncology surgery using time-driven activity-based costing. *Healthc (Amst)* 2016;**4**:173–80.
- 9  
10  
11  
12 35 Isaacson D, Ahmad T, Metzler I, *et al.* Defining the Costs of Reusable Flexible Ureteroscope Reprocessing Using Time-Driven Activity-Based Costing. *J Endourol* 2017;**31**:1026–31.
- 13  
14  
15  
16 36 Ilg AM, Laviana AA, Kamrava M, *et al.* Time-driven activity-based costing of low-dose-rate and high-dose-rate brachytherapy for low-risk prostate cancer. *Brachytherapy* 2016;**15**:760–7.
- 17  
18  
19  
20 37 Dziemianowicz M, Burmeister J, Dominello M. Examining the Financial Impact of Altered Fractionation in Breast Cancer: An Analysis Using Time-Driven Activity-Based Costing. *Pract Radiat Oncol* 2021;**11**:245–51.
- 21  
22  
23  
24 38 Fang, Shaker J, Drew JM, *et al.* The Cost of Hip and Knee Revision Arthroplasty by Diagnosis-Related Groups: Comparing Time-Driven Activity-Based Costing and Traditional Accounting. *J Arthroplasty* 2021;**36**:2674-2679.e2673.
- 25  
26  
27  
28 39 Fang, Shaker J, Hart P-A, *et al.* Variation in the profit margin for different types of total joint arthroplasty. *J Bone Joint Surg Am* 2021;**Publish Ahead of Print**. doi:10.2106/JBJS.21.00223
- 29  
30  
31  
32 40 Ahluwalia R, Cook J, Raheman F, *et al.* Improving the efficiency of ankle fracture care through home care and day-surgery units: Delivering safe surgery on a value-based healthcare model. *Surgeon* Published Online First: November 2020. doi:10.1016/j.surge.2020.08.004
- 33  
34  
35  
36 41 Wise KL, Parikh HR, Okelana B, *et al.* Measurement of value in rotator cuff repair: patient-level value analysis for the 1-year episode of care. *J Shoulder Elbow Surg* 2022;**31**:72–80.
- 37  
38  
39  
40 42 Hernandez A, Kaplan RS, Witkowski ML, *et al.* Navy Medicine Introduces Value-Based Health Care. *Health Aff* 2019;**38**:1393–400.
- 41  
42  
43  
44 43 Ning MS, Venkatesan AM, Stafford RJ, *et al.* Developing an intraoperative 3T MRI-guided brachytherapy program within a diagnostic imaging suite: Methods, process workflow, and value-based analysis. *Brachytherapy* 2020;**19**:427–37.
- 45  
46  
47  
48 44 Yu YR, Abbas PI, Smith CM, *et al.* Time-driven activity-based costing: A dynamic value assessment model in pediatric appendicitis. *J Pediatr Surg* 2017;**52**:1045–9.
- 49  
50  
51  
52 45 Basto J, Chahal R, Riedel B. Time-driven activity-based costing to model the utility of parallel induction redesign in high-turnover operating lists. *Healthc Pap* 2019;**7**. doi:10.1016/j.hjdsi.2019.01.003
- 53  
54  
55  
56  
57  
58  
59  
60

- 1  
2  
3 46 McCreary DL, Dugarte AJ, Vang S, *et al.* Patient-Level Value Analysis: An Innovative  
4 Approach to Optimize Care Delivery. *J Orthop Trauma* 2019;**33**:S49–52.  
5  
6  
7 47 Caloway C, Yamasaki A, Callans KM, *et al.* Quantifying the benefits from a care  
8 coordination program for tracheostomy placement in neonates. *Int J Pediatr*  
9 *Otorhinolaryngol* 2020;**134**. doi:10.1016/j.ijporl.2020.110025  
10  
11 48 Ahluwalia R, Vainieri E, Tam J, *et al.* Surgical Diabetic Foot Debridement: Improving  
12 Training and Practice Utilizing the Traffic Light Principle. *Int J Low Extrem Wounds*  
13 2019;**18**:279–86.  
14  
15 49 Kaplan AL, Agarwal N, Setlur NP, *et al.* Measuring the cost of care in benign prostatic  
16 hyperplasia using time-driven activity-based costing (TDABC). *Healthcare*. 2015;**3**:43–8.  
17 doi:10.1016/j.hjdsi.2014.09.007  
18  
19 50 Kurt P, Saban M, Cankaya F, *et al.* Time-Driven Activity-Based Costing in the  
20 Ophthalmology Department of State Hospital: a Case Study. *Fresenius Environ Bull*  
21 2019;**28**:2754–70.  
22  
23 51 Alibrahim A, Abdulsalam Y, Al Mutawa S, *et al.* Towards value-based healthcare:  
24 Establishing baseline pharmacy care costs for diabetes management. *Int J Health Plann*  
25 *Manage* 2022;**37**:790–803.  
26  
27 52 Fang C, Hagar A, Gordon M, *et al.* Differences in Hospital Costs among Octogenarians and  
28 Nonagenarians Following Primary Total Joint Arthroplasty. *Geriatrics* 2021;**6**:26.  
29  
30 53 Fang C, Pagani N, Gordon M, *et al.* Episode-of-Care Costs for Revision Total Joint  
31 Arthroplasties by Decadal Age Groups. *Geriatrics* 2021;**6**:49.  
32  
33 54 Ganske IM, Sanchez K, Le E, *et al.* Time-Driven, Activity-Based Costing of Presurgical  
34 Infant Orthopedics: A Critical Component of Establishing Value of Latham Appliance and  
35 Nasoalveolar Molding. *Plastic & Reconstructive Surgery* 2021;**147**:444–54.  
36  
37 55 McClintock TR, Friedlander DF, Feng AY, *et al.* Determining Variable Costs in the Acute  
38 Urolithiasis Cycle of Care Through Time-Driven Activity-Based Costing. *Urology*  
39 2021;**157**:107–13.  
40  
41 56 Sethi RK, Pumpian RP, Drolet CE, *et al.* Utilizing Lean Methodology and Time-Driven  
42 Activity-Based Costing Together: An Observational Pilot Study of Hip Replacement  
43 Surgery Utilizing a New Method to Study Value-Based Health Care. *J Bone Joint Surg Am*  
44 Published Online First: 14 October 2021. doi:10.2106/JBJS.21.00129  
45  
46 57 Thaker NG, Boyce-Fappiano D, Ning, *et al.* Activity-Based Costing of Intensity-Modulated  
47 Proton versus Photon Therapy for Oropharyngeal Cancer. *International Journal of Particle*  
48 *Therapy* 2021;**8**:374–82.  
49  
50 58 Kukreja JB, Seif MA, Mery MW, *et al.* Utilizing time-driven activity-based costing to  
51 determine open radical cystectomy and ileal conduit surgical episode cost drivers. *Urologic*  
52 *Oncology: Seminars and Original Investigations* 2021;**39**:237.e1-237.e5.  
53  
54  
55  
56  
57  
58  
59  
60

- 1  
2  
3 59 Mattar D, Di Filippo A, Invento A, *et al.* Economic implications of ACOSOG Z0011 trial  
4 application into clinical practice at the European Institute of Oncology. *Eur J Surg Oncol*  
5 2021;**47**:2499–505.  
6  
7 60 McLaughlin N, Burke MA, Setlur NP, *et al.* Time-driven activity-based costing: a driver for  
8 provider engagement in costing activities and redesign initiatives. *Neurosurg Focus*  
9 2014;**37**:E3.  
10  
11 61 Jacir A, Mendoza D, Dean E. The cost of care during times of COVID: Case study of  
12 TDABC and minimum utilization cost analysis in a medicare advantage population. *Journal*  
13 *of Health Care*  
14 2021;**48**.<http://www.healthfinancejournal.com/index.php/johcf/article/view/264>  
15  
16 62 Danilyants N, MacKoul P, van der Does L, *et al.* A value-based evaluation of minimally  
17 invasive hysterectomy approaches. *Gynecol Surg* 2019;**16**:5.  
18  
19 63 Parra E, Arenas MD, Alonso M, *et al.* Assessing value-based health care delivery for  
20 haemodialysis. *J Eval Clin Pract* 2017;**23**:477–85.  
21  
22 64 Danilyants N, MacKoul P, Baxi R, *et al.* Value-based assessment of hysterectomy  
23 approaches. *J Obstet Gynaecol Res* 2019;**45**:389–98.  
24  
25 65 Lenfant L, Sawczyn G, Kim S, *et al.* Single-institution Cost Comparison: Single-port Versus  
26 Multiport Robotic Prostatectomy. *European Urology Focus* Published Online First: 2020.  
27 doi:10.1016/j.euf.2020.06.010  
28  
29 66 Robinson JR, Carter NH, Gibson C, *et al.* Improving the value of care for appendectomy  
30 through an individual surgeon-specific approach. *J Pediatr Surg* 2018;**53**:1181–6.  
31  
32 67 Bueno H, Bernal JL, Jimenez-Jimenez V, *et al.* The Clinical outcomes, healthcare resource  
33 utilization, and related costs (COHERENT) model. Application in heart failure patients. *Rev*  
34 *Esp Cardiol* Published Online First: 20 October 2021. doi:10.1016/j.rec.2021.08.009  
35  
36 68 Casey M, Perera D, Enticott J, *et al.* High utilisers of emergency departments: the profile  
37 and journey of patients with mental health issues. *Int J Psychiatry Clin Pract* 2021;**25**:316–  
38 24.  
39  
40 69 Cohen RV, Nishikawa AM, Ribeiro RA, *et al.* Surgical Management of Obesity in Brazil:  
41 Proposal for a Value-Based Healthcare Model and Preliminary Results. *Value in Health*  
42 *Regional Issues* 2021;**26**:10–4.  
43  
44 70 Hennink SD, Hofland N, Gopie JP, *et al.* Value-based healthcare in Lynch syndrome. *Fam*  
45 *Cancer* 2013;**12**:347–54.  
46  
47 71 Medbery RL, Chadid TS, Sweeney JF, *et al.* Laparoscopic vs open right hepatectomy: A  
48 value-based analysis. *J Am Coll Surg* 2014;**218**:929–39.  
49  
50 72 Gabriel L, Casey J, Gee M, *et al.* Value-based healthcare analysis of joint replacement  
51 surgery for patients with primary hip osteoarthritis. *BMJ Open Quality* 2019;**8**:e000549.  
52  
53  
54  
55  
56  
57  
58  
59  
60

- 1  
2  
3 73 Ionov MV, Zhukova OV, Yudina YS, *et al.* Value-based approach to blood pressure  
4 telemonitoring and remote counseling in hypertensive patients. *Blood Press* 2021;**30**:20–30.  
5  
6  
7 74 Goretti G, Marinari GM, Vanni E, *et al.* Value-Based Healthcare and Enhanced Recovery  
8 After Surgery Implementation in a High-Volume Bariatric Center in Italy. *Obes Surg*  
9 2020;**30**:2519–27.  
10  
11 75 Konda SR, Lott A, Egol KA. Development of a Value-based Algorithm for Inpatient Triage  
12 of Elderly Hip Fracture Patients. *J Am Acad Orthop Surg* 2020;**28**:e566–72.  
13  
14 76 Verberne WR, Dijkers J, Kelder JC, *et al.* Value-based evaluation of dialysis versus  
15 conservative care in older patients with advanced chronic kidney disease: A cohort study.  
16 *BMC Nephrol* 2018;**19**. doi:10.1186/s12882-018-1004-4  
17  
18 77 Hersh EH, Yaeger KA, Neifert SN, *et al.* Patterns of health care costs due to external  
19 ventricular drain infections. *World Neurosurg* 2019;**128**:e31–7.  
20  
21 78 Meara JG, Hughes CD, Sanchez K, *et al.* Optimal Outcomes Reporting (OOR): A New  
22 Value-Based Metric for Outcome Reporting Following Cleft Palate Repair. *Cleft Palate*  
23 *Craniofac J* 2021;**58**:19–24.  
24  
25 79 Kirsch DB, Yang H, Maslow AL, *et al.* Association of Positive Airway Pressure Use With  
26 Acute Care Utilization and Costs. *J Clin Sleep Med* 2019;**15**:1243–50.  
27  
28 80 van Dijke JTJM, van Essen TA, Dijkman MD, *et al.* Functional and patient-reported  
29 outcome versus in-hospital costs after traumatic acute subdural hematoma (t-ASDH): a  
30 neurosurgical paradox? *Acta Neurochir* Published Online First: 2019. doi:10.1007/s00701-  
31 019-03878-5  
32  
33 81 Lentz TA, Rhon DI, George SZ. Predicting Opioid Use, Increased Health Care Utilization  
34 and High Costs for Musculoskeletal Pain: What Factors Mediate Pain Intensity and  
35 Disability? *Journal of Pain* 2020;**21**:135–45.  
36  
37 82 Silva-Velazco J, Dietz DW, Stocchi L, *et al.* Considering Value in Rectal Cancer Surgery:  
38 An Analysis of Costs and Outcomes Based on the Open, Laparoscopic, and Robotic  
39 Approach for Proctectomy. *Ann Surg* 2017;**265**:960–8.  
40  
41 83 Vuong B, Dehal A, Uppal A, *et al.* What Are the Most Significant Cost and Value Drivers  
42 for Pancreatic Resection in an Integrated Healthcare System? *J Am Coll Surg* 2018;**227**:45–  
43 53.  
44  
45 84 Chawla SS, Whitson AJ, Schiffman CJ, *et al.* Drivers of lower inpatient hospital costs and  
46 greater improvements in health-related quality of life for patients undergoing total shoulder  
47 and ream-and-run arthroplasty. *J Shoulder Elbow Surg* Published Online First: 2021.  
48 doi:10.1016/j.jse.2020.10.030  
49  
50 85 Peard L, Goodwin J, Hensley P, *et al.* Examining and Understanding Value: The Impact of  
51 Preoperative Characteristics, Intraoperative Variables, and Postoperative Complications on  
52 Cost of Robot-Assisted Laparoscopic Radical Prostatectomy. *J Endourol* 2019;**33**:541–8.  
53  
54  
55  
56  
57  
58  
59  
60

- 1  
2  
3 86 Harris AM, Hensley P, Goodwin J, *et al.* Examining and understanding value: The cost of  
4 preoperative characteristics, intraoperative variables and postoperative complications of  
5 minimally invasive partial nephrectomy. *Urol Pract* 2019;**6**:215–21.  
6  
7  
8 87 Winegar AL, Jackson LW, Sambare TD, *et al.* A surgeon scorecard is associated with  
9 improved value in elective primary hip and knee arthroplasty. *Journal of Bone and Joint*  
10 *Surgery - American Volume* 2019;**101**:152–9.  
11  
12 88 Ramshaw B, Forman BR, Moore K, *et al.* Real-World Clinical Quality Improvement for  
13 Complex Abdominal Wall Reconstruction. *Surg Technol Int* 2017;**30**:155–64.  
14  
15 89 Heincelman M, Schumann SO, Riley J, *et al.* Identification of High Utilization Inpatients on  
16 Internal Medicine Services. *Am J Med Sci* 2016;**352**:63–70.  
17  
18 90 Ramly EP, Larentzakis A, Bohnen JD, *et al.* The financial impact of intraoperative adverse  
19 events in abdominal surgery. *Surgery* 2015;**158**:1382–8.  
20  
21 91 Geerdink TH, Haverlag R, van Veen RN, *et al.* [Direct discharge from the ED for patients  
22 with simple stable injuries: a Dutch pilot study]. *Ned Tijdschr Geneesk*  
23 2020;**164**.<https://www.ncbi.nlm.nih.gov/pubmed/32391996>  
24  
25  
26 92 Abdulla AG, Ituarte PH, Wiggins R, *et al.* Endocrine surgery as a model for value-based  
27 health care delivery. *Surg Neurol Int* 2012;**3**:163.  
28  
29 93 van der Meulen M, Zamanipoor Najafabadi AH, Lobatto DJ, *et al.* Healthcare utilization  
30 and costs among prolactinoma patients: a cross-sectional study and analysis of determinants.  
31 *Pituitary* 2021;**24**:79–95.  
32  
33 94 Lobatto DJ, Vliet Vlieland TPM, van den Hout WB, *et al.* Feasibility, safety, and outcomes  
34 of a stratified fast-track care trajectory in pituitary surgery. *Endocrine* 2020;**69**:175–87.  
35  
36 95 Jalilian H, Doshmangir L, Ajami S, *et al.* Economic burden of gastric cancer in the first six  
37 months after diagnosis. *Int J Pharm Healthc Mark* 2019;**13**:436–46.  
38  
39 96 Lobatto DJ, van den Hout WB, Najafabadi AHZ, *et al.* Healthcare utilization and costs  
40 among patients with non-functioning pituitary adenomas. *Endocrine* 2019;**64**:330–40.  
41  
42 97 Yanik JM, Bedard NA, Hanley JM, *et al.* Rapid Recovery Total Joint Arthroplasty is Safe,  
43 Efficient, and Cost-Effective in the Veterans Administration Setting. *J Arthroplasty*  
44 2018;**33**:3138–42.  
45  
46 98 Weir TB, Usmani MF, Camacho J, *et al.* Effect of surgical setting on cost and hospital  
47 reported outcomes for single-level anterior cervical discectomy and fusion. *Int J Spine Surg*  
48 2021;**15**:701–9.  
49  
50 99 Gálvez ACM, Sánchez FJ, Moreno CA, *et al.* Value-based healthcare in ostomies. *Int J*  
51 *Environ Res Public Health* 2020;**17**:1–15.  
52  
53  
54  
55  
56  
57  
58  
59  
60



- 1  
2  
3 100 Burnhope E, Waring M, Guilder A, *et al.* A systematic approach towards implementing  
4 value-based health care in heart failure: Understandings from retrospective analysis methods  
5 in South London. *Health Serv Manage Res* Published Online First: 2020.  
6 doi:10.1177/0951484820971442  
7
- 8  
9 101 Kirsch DB, Yang H, Maslow AL, *et al.* Association of positive airway pressure use with  
10 acute care utilization and costs. *J Clin Sleep Med* 2019;**15**:1243–50.  
11
- 12 102 Khanijow AN, Wood LN, Xie R, *et al.* The impact of an enhanced recovery program (ERP)  
13 on the costs of colorectal surgery. *Am J Surg* 2021;**222**:186–92.  
14
- 15 103 Fernando-Canavan L, Gust A, Hsueh A, *et al.* Measuring the economic impact of hospital-  
16 acquired complications on an acute health service. *Aust Health Rev* 2021;**45**:135–42.  
17
- 18 104 Pasquali SK, Thibault D, Hall M, *et al.* Evolving Cost-Quality Relationship in Pediatric  
19 Heart Surgery. *Ann Thorac Surg* Published Online First: 8 June 2021.  
20 doi:10.1016/j.athoracsur.2021.05.050  
21
- 22 105 Negrini R, da Silva Ferreira RD, Guimaraes DZ. Value-based care in obstetrics: comparison  
23 between vaginal birth and caesarean section. *BMC Pregnancy Childbirth* 2021;**21**:333.  
24
- 25 106 Islam MK, Ruths S, Jansen K, *et al.* Evaluating an integrated care pathway for frail elderly  
26 patients in Norway using multi-criteria decision analysis. *BMC Health Serv Res* 2021;**21**:1–  
27 16.  
28
- 29 107 Fontebasso AM, Figueira S, Thavorn K, *et al.* Financial implications of trauma patients at a  
30 Canadian level 1 trauma center: a retrospective cohort study. *Trauma Surg Acute Care Open*  
31 2020;**5**:e000568.  
32
- 33 108 Robinson JR, Avritscher EBC, Gay JC, *et al.* Measuring the Value of a Clinical Practice  
34 Guideline for Children with Perforated Appendicitis. *Ann Surg* 2017;**266**:195–200.  
35
- 36 109 Sun LL, Cao DY, Yang JX, *et al.* Value-based medicine analysis on loop electrosurgical  
37 excision procedure and CO2 laser vaporization for the treatment of cervical intraepithelial  
38 neoplasia 2. *J Obstet Gynaecol Res* 2012;**38**:1064–70.  
39
- 40 110 Fürstenau D, Haneke H, Spies C, *et al.* Tackling the frailty burden with an integrative value-  
41 based approach: results from a mixed-methods study. *J Public Health* 2022;**30**:99–110.  
42
- 43 111 Ebinger JE, Strauss CE, Garberich RR, *et al.* Value-based ST-segment-elevation myocardial  
44 infarction care using risk-guided triage and early discharge. *Circ Cardiovasc Qual*  
45 *Outcomes* 2018;**11**. doi:10.1161/CIRCOUTCOMES.118.004553  
46
- 47 112 Jain N, Brock JL, Phillips FM, *et al.* Chronic preoperative opioid use is a risk factor for  
48 increased complications, resource use, and costs after cervical fusion. *Spine J*  
49 2018;**18**:1989–98.  
50  
51  
52  
53  
54  
55  
56  
57  
58  
59  
60

- 1  
2  
3 113 Rice-Townsend S, Barnes JN, Hall M, *et al.* Variation in practice and resource utilization  
4 associated with the diagnosis and management of appendicitis at freestanding children's  
5 hospitals: Implications for value-based comparative analysis. *Ann Surg* 2014;**259**:1228–34.  
6  
7  
8 114 Burnett RA Iii, Yang J, Courtney PM, *et al.* Costs of unicompartmental compared with total  
9 knee arthroplasty : a matched cohort study over ten years. *Bone Joint J* 2021;**103-B**:23–31.  
10  
11 115 Cronin KJ, Mair SD, Hawk GS, *et al.* Increased Health Care Costs and Opioid Use in  
12 Patients with Anxiety and Depression Undergoing Rotator Cuff Repair. *Arthroscopy -*  
13 *Journal of Arthroscopic and Related Surgery* 2020;**36**:2655–60.  
14  
15 116 Robles AJ, Kornblith LZ, Hendrickson CM, *et al.* Health care utilization and the cost of  
16 posttraumatic acute respiratory distress syndrome care. *J Trauma Acute Care Surg*  
17 2018;**85**:148–54.  
18  
19 117 Brown MM, Brown GC, Brown HC, *et al.* A Value-Based Medicine Analysis of  
20 Ranibizumab for the Treatment of Subfoveal Neovascular Macular Degeneration.  
21 *Ophthalmology* 2008;**115**:1039-1045.e5.  
22  
23  
24 118 Chovanec KA, Arsene C, Beck A, *et al.* Why not home?: A study of the impact of an effort  
25 to reduce postacute expenditures. *Prof Case Manag* 2022;**27**:3–11.  
26  
27 119 Brown GC, Brown MM, Brown HC, *et al.* A Value-Based Medicine Comparison of  
28 Interventions for Subfoveal Neovascular Macular Degeneration. *Ophthalmology*  
29 2007;**114**:1170–8.  
30  
31 120 van Deen WK, Spiro A, Burak Ozbay A, *et al.* The impact of value-based healthcare for  
32 inflammatory bowel diseases on healthcare utilization: a pilot study. *Eur J Gastroenterol*  
33 *Hepatol* 2017;**29**:331–7.  
34  
35  
36 121 Annabathula R, Dugan A, Bhalla V, *et al.* Value-based assessment of implementing a  
37 Pulmonary Embolism Response Team (PERT). *J Thromb Thrombolysis* 2021;**51**:217–25.  
38  
39 122 Ennis RD, Parikh AB, Sanderson M, *et al.* Interpreting oncology care model data to drive  
40 value-based care: A prostate cancer analysis. *J Oncol Pract* 2019;**15**:E238–46.  
41  
42 123 Denny JC, Cyr DD, Witsell DL, *et al.* A pathway to value-based care of chronic  
43 rhinosinusitis using a claims database. *Laryngoscope Investigative Otolaryngology*  
44 2019;**4**:193–206.  
45  
46 124 Peele P, Keyser D, Lovelace J, *et al.* Advancing Value-Based Population Health  
47 Management Through Payer-Provider Partnerships: Improving Outcomes for Children with  
48 Complex Conditions. *J Healthc Qual* 2018;**40**:e26–32.  
49  
50 125 Khullar OV, Jiang R, Force SD, *et al.* Transthoracic versus transhiatal resection for  
51 esophageal adenocarcinoma of the lower esophagus: A value-based comparison. *J Surg*  
52 *Oncol* 2015;**112**:517–23.  
53  
54  
55  
56  
57  
58  
59  
60

- 1  
2  
3 126 Ramirez MM, Brennan GP. Using the value-based care paradigm to compare physical  
4 therapy access to care models in cervical spine radiculopathy: a case report. *Physiother*  
5 *Theory Pract* 2020;**36**:1476–84.  
6  
7 127 Regan DK, Manoli A, Hutzler L, *et al.* Impact of Diabetes Mellitus on Surgical Quality  
8 Measures After Ankle Fracture Surgery: Implications for Value-Based Compensation and  
9 Pay for Performance. *J Orthop Trauma* 2015;**29**:e483-486.  
10  
11 128 Kadakia RJ, Ahearn BM, Tenenbaum S, *et al.* Costs Associated With Geriatric Ankle  
12 Fractures. *Foot Ankle Spec* 2017;**10**:26–30.  
13  
14 129 Barkley R, Soobader MJ, Wang J, *et al.* Reducing cancer costs through symptom  
15 management and triage pathways. *J Oncol Pract* 2019;**15**:E91–7.  
16  
17 130 Suidan RS, He W, Sun CC, *et al.* Total and out-of-pocket costs of different primary  
18 management strategies in ovarian cancer. *Am J Obstet Gynecol* 2019;**221**:136.e1-136.e9.  
19  
20 131 Hemmila MR, Cain-Nielsen AH, Wahl WL, *et al.* Regional collaborative quality  
21 improvement for trauma reduces complications and costs. *J Trauma Acute Care Surg*  
22 2015;**78**:78–85.  
23  
24 132 AlAshqar A, Goktepe ME, Kilic GS, *et al.* Predictors of the cost of hysterectomy for benign  
25 indications. *J Gynecol Obstet Hum Reprod* 2021;**50**:101936.  
26  
27 133 Naghavi AO, Gonzalez RJ, Scott JG, *et al.* Staged reconstruction brachytherapy has lower  
28 overall cost in recurrent soft-tissue sarcoma. *J Contemp Brachytherapy* 2017;**9**:20–9.  
29  
30 134 Puvanesarajah V, Kirby DJ, Jain A, *et al.* Cost Variation of Anterior Cervical Fusions in  
31 Elderly Medicare Beneficiaries. *Spine* 2017;**42**:E1010–5.  
32  
33 135 Passias PG, Poorman GW, Bortz CA, *et al.* Predictors of adverse discharge disposition in  
34 adult spinal deformity and associated costs. *Spine J* 2018;**18**:1845–52.  
35  
36 136 Manriquez E, Mandelbaum A, Aguayo E, *et al.* Factors associated with high-cost  
37 hospitalizations in elderly ovarian cancer patients. *Gynecol Oncol* 2020;**159**:767–72.  
38  
39 137 Rocque GB, Pisu M, Jackson BE, *et al.* Resource Use and Medicare Costs During Lay  
40 Navigation for Geriatric Patients With Cancer. *JAMA Oncol* 2017;**3**:817–25.  
41  
42 138 Brixner D, Rubin DT, Mease P, *et al.* Patient support program increased medication  
43 adherence with lower total health care costs despite increased drug spending. *Journal of*  
44 *Managed Care and Specialty Pharmacy* 2019;**25**:770–9.  
45  
46 139 Alli VV, Zhang J, Telem DA. Impact of incisional hernia development following abdominal  
47 operations on total healthcare cost. *Surg Endosc* 2018;**32**:2381–6.  
48  
49 140 Thakore RV, Greenberg SE, Shi H, *et al.* Surgical site infection in orthopedic trauma: A  
50 case-control study evaluating risk factors and cost. *Journal of Clinical Orthopaedics and*  
51 *Trauma* 2015;**6**:220–6.  
52  
53  
54  
55  
56  
57  
58  
59  
60

- 1  
2  
3 141 Smith BD, Jiang J, Shih YC, *et al.* Cost and complications of local therapies for early-stage  
4 breast cancer. *J Natl Cancer Inst* 2017;**109**. doi:10.1093/jnci/djw178  
5  
6 142 Klink AJ, Chmielowski B, Feinberg B, *et al.* Health care resource utilization and costs in  
7 first-line treatments for patients with metastatic melanoma in the United States. *Journal of*  
8 *Managed Care and Specialty Pharmacy* 2019;**25**:869–77.  
9  
10 143 Chotai S, Sivaganesan A, Parker SL, *et al.* Drivers of Variability in 90-Day Cost for  
11 Elective Anterior Cervical Discectomy and Fusion for Cervical Degenerative Disease. *Clin*  
12 *Neurosurg* 2018;**83**:898–904.  
13  
14 144 Ackerman RS, Hirschi M, Alford B, *et al.* Enhanced REVENUE after surgery? A cost-  
15 standardized enhanced recovery pathway for mastectomy decreases length of stay. *World J*  
16 *Surg* 2019;**43**:839–45.  
17  
18 145 Williams SB, Shan Y, Jazzar U, *et al.* Comparing Survival Outcomes and Costs Associated  
19 with Radical Cystectomy and Trimodal Therapy for Older Adults with Muscle-Invasive  
20 Bladder Cancer. *JAMA Surg* 2018;**153**:881–9.  
21  
22 146 Schilling PL, He J, Chen S, *et al.* Risk-Adjusted Cost Performance for 90-Day Total Hip  
23 Arthroplasty Episodes: Comparing US Hospitals Nationwide Before CJR. *J Arthroplasty*  
24 2020;**35**:3452–63.  
25  
26 147 Ackerman SJ, Knight T, Wahl PM, *et al.* Health care utilization and costs following  
27 amplified versus non-amplified molecular probe testing for symptomatic patients with  
28 suspected vulvovaginitis: A us commercial payer population. *Clinicoecon Outcomes Res*  
29 2019;**11**:179–89.  
30  
31 148 Patel MI, Ramirez D, Agajanian R, *et al.* Lay health worker-led cancer symptom screening  
32 intervention and the effect on patient-reported satisfaction, health status, health care use, and  
33 total costs: Results from a tri-part collaboration. *J Oncol Pract* 2020;**16**:E19–28.  
34  
35 149 Stearns LJ, Narang S, Albright RE, *et al.* Assessment of Health Care Utilization and Cost of  
36 Targeted Drug Delivery and Conventional Medical Management vs Conventional Medical  
37 Management Alone for Patients With Cancer-Related Pain. *JAMA Netw Open*  
38 2019;**2**:e191549.  
39  
40 150 Skill NJ, Butler J, O'Brien DC, *et al.* Financial Burden of Liver Transplant vs Resection for  
41 Hepatocellular Carcinoma. *Transplant Proc* 2019;**51**:1907–12.  
42  
43 151 Karnuta JM, Navarro SM, Haeberle HS, *et al.* Predicting Inpatient Payments Prior to Lower  
44 Extremity Arthroplasty Using Deep Learning: Which Model Architecture Is Best? *J*  
45 *Arthroplasty* 2019;**34**:2235-2241.e1.  
46  
47 152 Ning MS, Palmer MB, Shah AK, *et al.* Three-Year Results of a Prospective Statewide  
48 Insurance Coverage Pilot for Proton Therapy: Stakeholder Collaboration Improves Patient  
49 Access to Care. *JCO Oncol Pract* 2020;**16**:e966–76.  
50  
51  
52  
53  
54  
55  
56  
57  
58  
59  
60

- 1  
2  
3 153 Keller DS, Zhang J, Chand M. Opioid-free colorectal surgery: a method to improve patient  
4 & financial outcomes in surgery. *Surg Endosc* 2019;**33**:1959–66.  
5  
6 154 Rocque GB, Williams CP, Kenzik KM, *et al.* Where are the opportunities for reducing  
7 health care spending within alternative payment models? *J Oncol Pract* 2018;**14**:e375–83.  
8  
9 155 Sheetz KH, Kenney B, Dupree JM, *et al.* Targeting Value-Driven Quality Improvement for  
10 Laparoscopic Cholecystectomy in Michigan. *Ann Surg* 2019;**269**:127–32.  
11  
12 156 Zolin SJ, Tastaldi L, Alkhatib H, *et al.* Open retromuscular versus laparoscopic ventral  
13 hernia repair for medium-sized defects: where is the value? *Hernia* 2020;**24**:759–70.  
14  
15 157 Orhurhu V, Urits I, Olusunmade M, *et al.* Trends of Co-Morbid Depression in Hospitalized  
16 Patients with Failed Back Surgery Syndrome: An Analysis of the Nationwide Inpatient  
17 Sample. *Pain and Therapy* 2018;**7**:217–26.  
18  
19 158 Hollenbeck B, Hoffman MA, Tromanhauser SG. High-Volume Arthroplasty Centers  
20 Demonstrate Higher Composite Quality Scores and Enhanced Value: Perspective on Higher-  
21 Volume Hospitals Performing Arthroplasty from 2001 to 2011. *Journal of Bone and Joint*  
22 *Surgery - American Volume* 2020;**102**:362–7.  
23  
24 159 Loftus TJ, Rosenthal MD, Croft CA, *et al.* Effect of time to operation on value of care in  
25 acute care surgery. *World J Surg* 2018;**42**:2356–63.  
26  
27 160 Buell JF, Sigmon D, Ducoin C, *et al.* Initial Experience with Biologic Polymer Scaffold  
28 (Poly-4-hydroxybuturate) in Complex Abdominal Wall Reconstruction. *Ann Surg*  
29 2017;**266**:185–8.  
30  
31 161 Jain N, Phillips FM, Shimer AL, *et al.* Surgeon Reimbursement Relative to Hospital  
32 Payments for Spinal Fusion: Trends From 10-year Medicare Analysis. *Spine* 2018;**43**:720–  
33 31.  
34  
35 162 Stull JD, Bhat SB, Kane JM, *et al.* Economic Burden of Inpatient Admission of Ankle  
36 Fractures. *Foot Ankle Int* 2017;**38**:997–1004.  
37  
38 163 Lewis RB, Hariri O, Elliott ME, *et al.* Financial Analysis of Closed Femur Fractures in 3- to  
39 6-Year-Olds Treated with Immediate Spica Casting Versus Intramedullary Fixation. *Journal*  
40 *of Pediatric Orthopaedics* 2019;**39**:E114–9.  
41  
42 164 Murphy WS, Cheng T, Lin B, *et al.* Higher Volume Surgeons Have Lower Medicare  
43 Payments, Readmissions, and Mortality After THA. *Clin Orthop Relat Res* 2019;**477**:334–  
44 41.  
45  
46 165 King AM, Danagouliau S, Lynch M, *et al.* The Effect of a Medical Toxicology Inpatient  
47 Service in an Academic Tertiary Care Referral Center. *J Med Toxicol* 2019;**15**:12–21.  
48  
49 166 Click B, Lopez R, Arrigain S, *et al.* Shifting Cost-drivers of Health Care Expenditures in  
50 Inflammatory Bowel Disease. *Inflamm Bowel Dis* 2020;**26**:1268–75.  
51  
52  
53  
54  
55  
56  
57  
58  
59  
60

- 1  
2  
3 167 Padilla JA, Gabor JA, Ryan SP, *et al.* Total Hip Arthroplasty for Femoral Neck Fracture:  
4 The Economic Implications of Orthopedic Subspecialty Training. *J Arthroplasty*  
5 2020;**35**:S101–6.  
6  
7  
8 168 Pang J, Crawford K, Faraji F, *et al.* An Analysis of 1-Year Charges for Head and Neck  
9 Cancer: Targets for Value-Based Interventions. *Otolaryngol Head Neck Surg*  
10 2020;**163**:546–53.  
11  
12 169 Patel MI, Ramirez D, Agajanian R, *et al.* Association of a Lay Health Worker Intervention  
13 With Symptom Burden, Survival, Health Care Use, and Total Costs Among Medicare  
14 Enrollees With Cancer. *JAMA Netw Open* 2020;**3**:e201023.  
15  
16 170 Thaci B, McGirt MJ, Ammerman JM, *et al.* Reduction of direct costs in high-risk lumbar  
17 discectomy patients during the 90-day post-operative period through annular closure.  
18 *Clinicoecon Outcomes Res* 2019;**11**:191–7.  
19  
20 171 Gupta P, Rettiganti M. Relationship of Hospital Costs With Mortality in Pediatric Critical  
21 Care: A Multi-Institutional Analysis. *Pediatr Crit Care Med* 2017;**18**:541–9.  
22  
23 172 Nelson AA, Pearce DJ, Fleischer AB, *et al.* Infliximab for inpatient psoriasis management -  
24 is there a role? *J Dermatolog Treat* 2005;**16**:314–8.  
25  
26 173 Zhang S, Vora M, Harris AHS, *et al.* Cost-Minimization Analysis of Open and Endoscopic  
27 Carpal Tunnel Release. *J Bone Joint Surg Am* 2016;**98**:1970–7.  
28  
29 174 Adenikinju A, Ranson R, Rettig SA, *et al.* Ability of a Risk Prediction Tool to Stratify  
30 Quality and Cost for Older Patients With Operative Distal Radius Fractures. *Geriatr Orthop*  
31 *Surg Rehabil* 2021;**12**:2151459321999634.  
32  
33 175 Baughman DJ, Waheed A, Khan MN, *et al.* Enhancing Value-Based Care With a Walk-in  
34 Clinic: A Primary Care Provider Intervention to Decrease Low Acuity Emergency  
35 Department Overutilization. *Cureus* 2021;**13**:e13284.  
36  
37 176 Berinstein JA, Cohen-Mekelburg SA, Greenberg GM, *et al.* A Care Coordination  
38 Intervention Improves Symptoms But Not Charges in High-Risk Patients With  
39 Inflammatory Bowel Disease. *Clinical Gastroenterology & Hepatology* Published Online  
40 First: 28 August 2021. doi:10.1016/j.cgh.2021.08.034  
41  
42 177 Beschloss A, Dicindio C, Lombardi J, *et al.* Marked increase in Spinal Deformity Surgery  
43 throughout the United States. *Spine* 2021;**46**:1402–8.  
44  
45 178 Jang DW, Lee HJ, Chen PG, *et al.* Geographic variations in healthcare utilization and  
46 expenditure for chronic rhinosinusitis: A population-based approach. *Laryngoscope*  
47 2021;**131**:2641–8.  
48  
49 179 Ko H, Brodke DS, Vanneman ME, *et al.* Is discretionary care associated with safety among  
50 Medicare beneficiaries undergoing spine surgery? *J Bone Joint Surg Am* 2021;**Publish**  
51 **Ahead of Print**. doi:10.2106/JBJS.21.00389  
52  
53  
54  
55  
56  
57  
58  
59  
60

- 1  
2  
3 180 Malik AT, Khan SN, Voskuil RT, *et al.* What is the value of undergoing surgery for spinal  
4 metastases at Dedicated Cancer Centers? *Clin Orthop Relat Res* 2021;**479**:1311–9.  
5  
6 181 Newman TV, Munshi KD, Neilson LM, *et al.* Health care utilization and costs associated  
7 with switching from DPP-4i to GLP-1RA or SGLT2i: an observational cohort study.  
8 *Journal of Managed Care & Specialty Pharmacy* 2021;**27**:435–43.  
9  
10 182 Tomicki S, Dieguez G, Latimer H, *et al.* Real-World Cost of Care for Commercially Insured  
11 versus Medicare Patients with Metastatic Pancreatic Cancer Who Received Guideline-  
12 Recommended Therapies. *American Health & Drug Benefits* 2021;**14**:70–8.  
13  
14 183 Buell JF, Flaris AN, Raju S, *et al.* Long-Term Outcomes in Complex Abdominal Wall  
15 Reconstruction Repaired With Absorbable Biologic Polymer Scaffold (Poly-4-  
16 Hydroxybutyrate). *Annals of Surgery Open* 2021;**2**:e032.  
17  
18 184 King BC, Richardson T, Patel RM, *et al.* Prioritization framework for improving the value  
19 of care for very low birth weight and very preterm infants. *J Perinatol* 2021;**41**:2463–73.  
20  
21 185 Skibicki H, Yayac M, Krueger CA, *et al.* Target price adjustment for hip fractures is not  
22 sufficient in the Bundled Payments for Care Improvement initiative. *J Arthroplasty*  
23 2021;**36**:47–53.  
24  
25 186 Clewley D, Iftikhar Y, Horn ME, *et al.* Do the number of visits and the cost of  
26 musculoskeletal care improve outcomes? More may not be better. *J Orthop Sports Phys*  
27 *Ther* 2020;**50**:642–8.  
28  
29 187 Walker B, Wilfong L, Frytak J, *et al.* Practice patterns among oncologists participating in  
30 the oncology care model after three years. *J Cancer Policy* 2021;**29**:100294.  
31  
32 188 Krueger CA, Yayac M, Vannello C, *et al.* Are we at the bottom? BPCI programs now  
33 disincentivize providers who maintain quality despite caring for increasingly complex  
34 patients. *J Arthroplasty* 2021;**36**:13–8.  
35  
36 189 Horton BS, Marland JD, West HS, *et al.* Transition to telehealth physical therapy after hip  
37 arthroscopy for femoroacetabular impingement: A pilot study with retrospective matched-  
38 cohort analysis. *Orthop J Sports Med* 2021;**9**:2325967121997469.  
39  
40 190 Nguyen NH, Luo J, Ohno-Machado L, *et al.* Burden and outcomes of fragmentation of care  
41 in hospitalized patients with inflammatory bowel diseases: A nationally representative  
42 cohort. *Inflamm Bowel Dis* 2021;**27**:1026–34.  
43  
44 191 Gregory D, Scotti DJ, de Lissovoy G, *et al.* A value-based analysis of hemodynamic support  
45 strategies for high-risk heart failure patients undergoing a percutaneous coronary  
46 intervention. *Am Health Drug Benefits* 2013;**6**:88–99.  
47  
48 192 Schwartz DA, Shah AA, Zogg CK, *et al.* Operative delay to laparoscopic cholecystectomy:  
49 Racking up the cost of health care. *J Trauma Acute Care Surg* 2015;**79**:15–21.  
50  
51  
52  
53  
54  
55  
56  
57  
58  
59  
60

- 1  
2  
3 193 Aguayo E, Sanaiha Y, Seo YJ, *et al.* Heparin-induced thrombocytopenia in cardiac surgery:  
4 Incidence, costs, and duration of stay. *Surgery* 2018;**164**:1377–81.  
5  
6 194 Canizares MF, Feldman L, Miller PE, *et al.* Complications and Cost of Syndactyly  
7 Reconstruction in the United States: Analysis of the Pediatric Health Information System.  
8 *Hand* 2017;**12**:327–34.  
9  
10 195 Sanaiha Y, Mantha A, Ziaieian B, *et al.* Trends in Readmission and Costs After  
11 Transcatheter Implantation Versus Surgical Aortic Valve Replacement in Patients With  
12 Renal Dysfunction. *Am J Cardiol* 2019;**123**:1481–8.  
13  
14 196 Sanaiha Y, Kavianpour B, Downey P, *et al.* National Study of Index and Readmission  
15 Mortality and Costs for Thoracic Endovascular Aortic Repair in Patients With Renal  
16 Disease. *Ann Thorac Surg* 2020;**109**:458–64.  
17  
18 197 Labovitz JM, Kominski GF. Forecasting the value of podiatric medical care in newly  
19 insured diabetic patients during implementation of the affordable care act in California. *J*  
20 *Am Podiatr Med Assoc* 2016;**106**:163–71.  
21  
22 198 Johnson JT, Scholtens DM, Kuang A, *et al.* Does Value Vary by Center Surgical Volume  
23 for Neonates With Truncus Arteriosus? A Multicenter Study. *Ann Thorac Surg* Published  
24 Online First: 2021. doi:10.1016/j.athoracsur.2020.05.178  
25  
26 199 Saifi C, Cazzulino A, Park C, *et al.* National Trends for Primary and Revision Lumbar Disc  
27 Arthroplasty Throughout the United States. *Global Spine Journal* 2018;**8**:172–7.  
28  
29 200 Boucek DM, Lal AK, Eckhauser AW, *et al.* Resource Utilization for Initial Hospitalization  
30 in Pediatric Heart Transplantation in the United States. *Am J Cardiol* 2018;**121**:981–5.  
31  
32 201 Laratta JL, Reddy H, Lombardi JM, *et al.* Utilization of Interspinous Devices Throughout  
33 the United States Over a Recent Decade: An Analysis of the Nationwide Inpatient Sample.  
34 *Global Spine Journal* 2018;**8**:382–7.  
35  
36 202 Karnuta JM, Golubovsky JL, Haeberle HS, *et al.* Can a machine learning model accurately  
37 predict patient resource utilization following lumbar spinal fusion? *Spine J* 2020;**20**:329–36.  
38  
39 203 Karnuta JM, Navarro SM, Haeberle HS, *et al.* Bundled Care for Hip Fractures: A Machine-  
40 Learning Approach to an Untenable Patient-Specific Payment Model. *J Orthop Trauma*  
41 2019;**33**:324–30.  
42  
43 204 Navarro SM, Ramkumar PN, Egger AC, *et al.* Evidence-Based Thresholds for the Volume-  
44 Value Relationship in Adolescent Idiopathic Scoliosis: Outcomes and Economies of Scale.  
45 *Spine Deformity* 2018;**6**:156–63.  
46  
47 205 Bateni SB, Gingrich AA, Hoch JS, *et al.* Defining Value for Pancreatic Surgery in Early-  
48 Stage Pancreatic Cancer. *JAMA Surg* 2019;**154**. doi:10.1001/jamasurg.2019.3019  
49  
50  
51  
52  
53  
54  
55  
56  
57  
58  
59  
60



- 1  
2  
3 206 Xiao R, Miller JA, Zafirau WJ, *et al.* Impact of Home Health Care on Health Care Resource  
4 Utilization Following Hospital Discharge: A Cohort Study. *Am J Med* 2018;**131**:395-  
5 407.e35.  
6  
7 207 Gandjian M, Williamson C, Sanaiha Y, *et al.* Continued Relevance of Minimum Volume  
8 Standards for Elective Esophagectomy: A National Perspective. *Ann Thorac Surg* Published  
9 Online First: 23 August 2021. doi:10.1016/j.athoracsur.2021.07.061  
10  
11 208 Hadaya J, Sanaiha Y, Hernandez R, *et al.* Impact of hospital volume on resource use after  
12 elective cardiac surgery: A contemporary analysis. *Surgery* 2021;**170**:682–8.  
13  
14 209 Seyidova N, Chen AD, del Valle D, *et al.* Nationwide cost variation for lower extremity flap  
15 reconstruction. *Eur J Plast Surg* 2021;**44**:475–82.  
16  
17 210 Sanaiha Y, Downey P, Lyons R, *et al.* Trends in utilization, mortality, and resource use after  
18 implantation of left ventricular assist devices in the United States. *J Thorac Cardiovasc Surg*  
19 2021;**161**:2083-2091.e4.  
20  
21 211 Frankel WC, Navarro SM, Haeberle HS, *et al.* Optimizing the Volume–Value Relationship  
22 in Laminectomy. *Spine* 2019;**44**:659–69.  
23  
24 212 Miller PE, Guha A, Khera R, *et al.* National Trends in Healthcare-Associated Infections for  
25 Five Common Cardiovascular Conditions. *Am J Cardiol* 2019;**124**:1140–8.  
26  
27 213 Mukdad L, Mantha A, Aguayo E, *et al.* Readmission and resource utilization after  
28 orthotopic heart transplant versus ventricular assist device in the National Readmissions  
29 Database, 2010–2014. *Surgery* 2018;**164**:274–81.  
30  
31 214 Navarro SM, Wang EY, Haeberle HS, *et al.* Machine Learning and Primary Total Knee  
32 Arthroplasty: Patient Forecasting for a Patient-Specific Payment Model. *J Arthroplasty*  
33 2018;**33**:3617–23.  
34  
35 215 Iloabuchi C, Dwibedi N, LeMasters T, *et al.* Low-value care and excess out-of-pocket  
36 expenditure among older adults with incident cancer – A machine learning approach.  
37 *Journal of Cancer Policy* 2021;**30**:100312.  
38  
39 216 Siu VJ, Varkey T, Khan UN, *et al.* Lend Me a Hand: A Value-Based Care Case Study on  
40 Pan Plexopathy of Unknown Origin. *Cureus* 2021;**13**.  
41  
42  
43  
44  
45  
46  
47  
48  
49  
50  
51  
52  
53  
54  
55  
56  
57  
58  
59  
60

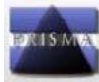

## PRISMA 2020 Checklist

1  
2  
3  
4  
5  
6  
7  
8  
9  
10  
11  
12  
13  
14  
15  
16  
17  
18  
19  
20  
21  
22  
23  
24  
25  
26  
27  
28  
29  
30  
31  
32  
33  
34  
35  
36  
37  
38  
39  
40  
41  
42  
43  
44  
45  
46  
47

| Section and Topic             | Item # | Checklist item                                                                                                                                                                                                                                                                                       | Location where item is reported |
|-------------------------------|--------|------------------------------------------------------------------------------------------------------------------------------------------------------------------------------------------------------------------------------------------------------------------------------------------------------|---------------------------------|
| <b>TITLE</b>                  |        |                                                                                                                                                                                                                                                                                                      |                                 |
| Title                         | 1      | Identify the report as a systematic review.                                                                                                                                                                                                                                                          | pg 0                            |
| <b>ABSTRACT</b>               |        |                                                                                                                                                                                                                                                                                                      |                                 |
| Abstract                      | 2      | See the PRISMA 2020 for Abstracts checklist.                                                                                                                                                                                                                                                         |                                 |
| <b>INTRODUCTION</b>           |        |                                                                                                                                                                                                                                                                                                      |                                 |
| Rationale                     | 3      | Describe the rationale for the review in the context of existing knowledge.                                                                                                                                                                                                                          | pg1-3                           |
| Objectives                    | 4      | Provide an explicit statement of the objective(s) or question(s) the review addresses.                                                                                                                                                                                                               | pg 3                            |
| <b>METHODS</b>                |        |                                                                                                                                                                                                                                                                                                      |                                 |
| Eligibility criteria          | 5      | Specify the inclusion and exclusion criteria for the review and how studies were grouped for the syntheses.                                                                                                                                                                                          | pg 4 and supplement             |
| Information sources           | 6      | Specify all databases, registers, websites, organisations, reference lists and other sources searched or consulted to identify studies. Specify the date when each source was last searched or consulted.                                                                                            | Pg 4 and supplement             |
| Search strategy               | 7      | Present the full search strategies for all databases, registers and websites, including any filters and limits used.                                                                                                                                                                                 | Supplement                      |
| Selection process             | 8      | Specify the methods used to decide whether a study met the inclusion criteria of the review, including how many reviewers screened each record and each report retrieved, whether they worked independently, and if applicable, details of automation tools used in the process.                     | pg 6                            |
| Data collection process       | 9      | Specify the methods used to collect data from reports, including how many reviewers collected data from each report, whether they worked independently, any processes for obtaining or confirming data from study investigators, and if applicable, details of automation tools used in the process. | pg 6                            |
| Data items                    | 10a    | List and define all outcomes for which data were sought. Specify whether all results that were compatible with each outcome domain in each study were sought (e.g. for all measures, time points, analyses), and if not, the methods used to decide which results to collect.                        | pg 4, supplement                |
|                               | 10b    | List and define all other variables for which data were sought (e.g. participant and intervention characteristics, funding sources). Describe any assumptions made about any missing or unclear information.                                                                                         | pg 4, supplement                |
| Study risk of bias assessment | 11     | Specify the methods used to assess risk of bias in the included studies, including details of the tool(s) used, how many reviewers assessed each study and whether they worked independently, and if applicable, details of automation tools used in the process.                                    | pg 4, supplement                |
| Effect measures               | 12     | Specify for each outcome the effect measure(s) (e.g. risk ratio, mean difference) used in the synthesis or presentation of results.                                                                                                                                                                  | pg 4                            |
| Synthesis methods             | 13a    | Describe the processes used to decide which studies were eligible for each synthesis (e.g. tabulating the study intervention characteristics and comparing against the planned groups for each synthesis (item #5)).                                                                                 | pg 8                            |
|                               | 13b    | Describe any methods required to prepare the data for presentation or synthesis, such as handling of missing summary statistics, or data conversions.                                                                                                                                                | N/A                             |
|                               | 13c    | Describe any methods used to tabulate or visually display results of individual studies and syntheses.                                                                                                                                                                                               | pg 8                            |
|                               | 13d    | Describe any methods used to synthesize results and provide a rationale for the choice(s). If meta-analysis was performed, describe the model(s), method(s) to identify the presence and extent of statistical heterogeneity, and software package(s) used.                                          | pg 4                            |
|                               | 13e    | Describe any methods used to explore possible causes of heterogeneity among study results (e.g. subgroup analysis, meta-regression).                                                                                                                                                                 | N/A                             |
|                               | 13f    | Describe any sensitivity analyses conducted to assess robustness of the synthesized results.                                                                                                                                                                                                         | N/A                             |
| Reporting bias assessment     | 14     | Describe any methods used to assess risk of bias due to missing results in a synthesis (arising from reporting biases).                                                                                                                                                                              | N/A, discussed pg 23            |
| Certainty assessment          | 15     | Describe any methods used to assess certainty (or confidence) in the body of evidence for an outcome.                                                                                                                                                                                                | N/A                             |

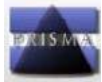

## PRISMA 2020 Checklist

| Section and Topic                              | Item # | Checklist item                                                                                                                                                                                                                                                                       | Location where item is reported |
|------------------------------------------------|--------|--------------------------------------------------------------------------------------------------------------------------------------------------------------------------------------------------------------------------------------------------------------------------------------|---------------------------------|
| <b>RESULTS</b>                                 |        |                                                                                                                                                                                                                                                                                      |                                 |
| Study selection                                | 16a    | Describe the results of the search and selection process, from the number of records identified in the search to the number of studies included in the review, ideally using a flow diagram.                                                                                         | pg 5,6, 7                       |
|                                                | 16b    | Cite studies that might appear to meet the inclusion criteria, but which were excluded, and explain why they were excluded.                                                                                                                                                          | pg 5 (flowchart)                |
| Study characteristics                          | 17     | Cite each included study and present its characteristics.                                                                                                                                                                                                                            | pg 7-14, and supplement         |
| Risk of bias in studies                        | 18     | Present assessments of risk of bias for each included study.                                                                                                                                                                                                                         | N/A                             |
| Results of individual studies                  | 19     | For all outcomes, present, for each study: (a) summary statistics for each group (where appropriate) and (b) an effect estimate and its precision (e.g. confidence/credible interval), ideally using structured tables or plots.                                                     | N/A                             |
| Results of syntheses                           | 20a    | For each synthesis, briefly summarise the characteristics and risk of bias among contributing studies.                                                                                                                                                                               | N/A                             |
|                                                | 20b    | Present results of all statistical syntheses conducted. If meta-analysis was done, present for each the summary estimate and its precision (e.g. confidence/credible interval) and measures of statistical heterogeneity. If comparing groups, describe the direction of the effect. | N/A                             |
|                                                | 20c    | Present results of all investigations of possible causes of heterogeneity among study results.                                                                                                                                                                                       | pg 7-9                          |
|                                                | 20d    | Present results of all sensitivity analyses conducted to assess the robustness of the synthesized results.                                                                                                                                                                           | N/A                             |
| Reporting biases                               | 21     | Present assessments of risk of bias due to missing results (arising from reporting biases) for each synthesis assessed.                                                                                                                                                              | N/A                             |
| Certainty of evidence                          | 22     | Present assessments of certainty (or confidence) in the body of evidence for each outcome assessed.                                                                                                                                                                                  | N/A                             |
| <b>DISCUSSION</b>                              |        |                                                                                                                                                                                                                                                                                      |                                 |
| Discussion                                     | 23a    | Provide a general interpretation of the results in the context of other evidence.                                                                                                                                                                                                    | pg 18-21                        |
|                                                | 23b    | Discuss any limitations of the evidence included in the review.                                                                                                                                                                                                                      | pg 21                           |
|                                                | 23c    | Discuss any limitations of the review processes used.                                                                                                                                                                                                                                | pg 21, 4                        |
|                                                | 23d    | Discuss implications of the results for practice, policy, and future research.                                                                                                                                                                                                       | pg 18-21                        |
| <b>OTHER INFORMATION</b>                       |        |                                                                                                                                                                                                                                                                                      |                                 |
| Registration and protocol                      | 24a    | Provide registration information for the review, including register name and registration number, or state that the review was not registered.                                                                                                                                       | pg 4                            |
|                                                | 24b    | Indicate where the review protocol can be accessed, or state that a protocol was not prepared.                                                                                                                                                                                       | supplement                      |
|                                                | 24c    | Describe and explain any amendments to information provided at registration or in the protocol.                                                                                                                                                                                      | N/A                             |
| Support                                        | 25     | Describe sources of financial or non-financial support for the review, and the role of the funders or sponsors in the review.                                                                                                                                                        | Funding statement               |
| Competing interests                            | 26     | Declare any competing interests of review authors.                                                                                                                                                                                                                                   | Author statement                |
| Availability of data, code and other materials | 27     | Report which of the following are publicly available and where they can be found: template data collection forms; data extracted from included studies; data used for all analyses; analytic code; any other materials used in the review.                                           | Data availability statement     |

From: Page MJ, McKenzie JE, Bossuyt PM, Boutron I, Hoffmann TC, Mulrow CD, et al. The PRISMA 2020 statement: an updated guideline for reporting systematic reviews. *BMJ* 2021;372:n71. doi: 10.1136/bmj.n71

For peer review only - <http://bmjopen.bmj.com/site/about/guidelines.xhtml>  
For more information, visit: <http://www.prisma-statement.org/>

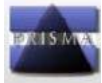

## PRISMA 2020 for Abstracts Checklist

1  
2  
3  
4  
5  
6  
7  
8  
9  
10  
11  
12  
13  
14  
15  
16  
17  
18  
19  
20  
21  
22  
23  
24  
25  
26  
27  
28  
29  
30  
31  
32  
33  
34  
35  
36  
37  
38  
39  
40  
41  
42  
43  
44  
45  
46  
47

| Section and Topic       | Item # | Checklist item                                                                                                                                                                                                                                                                                        | Reported (Yes/No) |
|-------------------------|--------|-------------------------------------------------------------------------------------------------------------------------------------------------------------------------------------------------------------------------------------------------------------------------------------------------------|-------------------|
| <b>TITLE</b>            |        |                                                                                                                                                                                                                                                                                                       |                   |
| Title                   | 1      | Identify the report as a systematic review.                                                                                                                                                                                                                                                           | yes               |
| <b>BACKGROUND</b>       |        |                                                                                                                                                                                                                                                                                                       |                   |
| Objectives              | 2      | Provide an explicit statement of the main objective(s) or question(s) the review addresses.                                                                                                                                                                                                           | yes               |
| <b>METHODS</b>          |        |                                                                                                                                                                                                                                                                                                       |                   |
| Eligibility criteria    | 3      | Specify the inclusion and exclusion criteria for the review.                                                                                                                                                                                                                                          | yes               |
| Information sources     | 4      | Specify the information sources (e.g. databases, registers) used to identify studies and the date when each was last searched.                                                                                                                                                                        | yes               |
| Risk of bias            | 5      | Specify the methods used to assess risk of bias in the included studies.                                                                                                                                                                                                                              | no                |
| Synthesis of results    | 6      | Specify the methods used to present and synthesise results.                                                                                                                                                                                                                                           | yes               |
| <b>RESULTS</b>          |        |                                                                                                                                                                                                                                                                                                       |                   |
| Included studies        | 7      | Give the total number of included studies and participants and summarise relevant characteristics of studies.                                                                                                                                                                                         | yes               |
| Synthesis of results    | 8      | Present results for main outcomes, preferably indicating the number of included studies and participants for each. If meta-analysis was done, report the summary estimate and confidence/credible interval. If comparing groups, indicate the direction of the effect (i.e. which group is favoured). | yes               |
| <b>DISCUSSION</b>       |        |                                                                                                                                                                                                                                                                                                       |                   |
| Limitations of evidence | 9      | Provide a brief summary of the limitations of the evidence included in the review (e.g. study risk of bias, inconsistency and imprecision).                                                                                                                                                           | yes               |
| Interpretation          | 10     | Provide a general interpretation of the results and important implications.                                                                                                                                                                                                                           | yes               |
| <b>OTHER</b>            |        |                                                                                                                                                                                                                                                                                                       |                   |
| Funding                 | 11     | Specify the primary source of funding for the review.                                                                                                                                                                                                                                                 | yes               |
| Registration            | 12     | Provide the register name and registration number.                                                                                                                                                                                                                                                    | N/A               |

For more information, visit: <http://www.prisma-statement.org/>

# BMJ Open

## Cost measurement in value-based health care: a systematic review

|                                 |                                                                                                                                                                                                                                                                                                                                                                                                                       |
|---------------------------------|-----------------------------------------------------------------------------------------------------------------------------------------------------------------------------------------------------------------------------------------------------------------------------------------------------------------------------------------------------------------------------------------------------------------------|
| Journal:                        | <i>BMJ Open</i>                                                                                                                                                                                                                                                                                                                                                                                                       |
| Manuscript ID                   | bmjopen-2022-066568.R1                                                                                                                                                                                                                                                                                                                                                                                                |
| Article Type:                   | Original research                                                                                                                                                                                                                                                                                                                                                                                                     |
| Date Submitted by the Author:   | 21-Oct-2022                                                                                                                                                                                                                                                                                                                                                                                                           |
| Complete List of Authors:       | Leusder, Maura; Erasmus University Rotterdam, Department of Health Services Management & Organisation<br>Porte, Petra; Erasmus University Rotterdam, Department of Health Services Management & Organisation<br>Ahaus, Kees; Erasmus University Rotterdam, Department of Health Services Management & Organisation<br>van Elten, Hilco; Nyenrode Business Universiteit, Center for Corporate Reporting, Finance & Tax |
| <b>Primary Subject Heading</b>: | Health services research                                                                                                                                                                                                                                                                                                                                                                                              |
| Secondary Subject Heading:      | Health services research                                                                                                                                                                                                                                                                                                                                                                                              |
| Keywords:                       | Organisation of health services < HEALTH SERVICES ADMINISTRATION & MANAGEMENT, Health policy < HEALTH SERVICES ADMINISTRATION & MANAGEMENT, Health economics < HEALTH SERVICES ADMINISTRATION & MANAGEMENT, HEALTH SERVICES ADMINISTRATION & MANAGEMENT                                                                                                                                                               |
|                                 |                                                                                                                                                                                                                                                                                                                                                                                                                       |

SCHOLARONE™  
Manuscripts



I, the Submitting Author has the right to grant and does grant on behalf of all authors of the Work (as defined in the below author licence), an exclusive licence and/or a non-exclusive licence for contributions from authors who are: i) UK Crown employees; ii) where BMJ has agreed a CC-BY licence shall apply, and/or iii) in accordance with the terms applicable for US Federal Government officers or employees acting as part of their official duties; on a worldwide, perpetual, irrevocable, royalty-free basis to BMJ Publishing Group Ltd ("BMJ") its licensees and where the relevant Journal is co-owned by BMJ to the co-owners of the Journal, to publish the Work in this journal and any other BMJ products and to exploit all rights, as set out in our [licence](#).

The Submitting Author accepts and understands that any supply made under these terms is made by BMJ to the Submitting Author unless you are acting as an employee on behalf of your employer or a postgraduate student of an affiliated institution which is paying any applicable article publishing charge ("APC") for Open Access articles. Where the Submitting Author wishes to make the Work available on an Open Access basis (and intends to pay the relevant APC), the terms of reuse of such Open Access shall be governed by a Creative Commons licence – details of these licences and which [Creative Commons](#) licence will apply to this Work are set out in our licence referred to above.

Other than as permitted in any relevant BMJ Author's Self Archiving Policies, I confirm this Work has not been accepted for publication elsewhere, is not being considered for publication elsewhere and does not duplicate material already published. I confirm all authors consent to publication of this Work and authorise the granting of this licence.

**Title: Cost measurement in value-based health care: a systematic review**

**Running head: Cost measurement in value-based healthcare**

**Authors:** Maura Leusder, Petra Porte, Kees Ahaus, and Hilco van Elten

Maura Leusder, MSc.

Department Health Services Management & Organisation, Erasmus University Rotterdam  
The Netherlands

Petra J. Porte, PhD.

Department Health Services Management & Organisation, Erasmus University Rotterdam  
The Netherlands

C.T.B. (Kees) Ahaus, Prof. Dr. Ir.

Department Health Services Management & Organisation, Erasmus University Rotterdam  
The Netherlands

Hilco J. van Elten, PhD.

Center for Corporate Reporting, Finance & Tax, Nyenrode Business University, Breukelen, The  
Netherlands

**Corresponding author;** Maura Leusder, MSc.

leusder@eshpm.eur.nl.

+31 06 38002149

J6-41, Bayle Building (J) Burgemeester Oudlaan 50, 3062 PA Rotterdam

Postbus 1738, 3000 DR Rotterdam

Word count: 4161

Tables and figures: 5

**Keywords:** Costs, value-based healthcare, cost accounting, process improvements, time-driven activity-based costing, activity-based costing, decision-making

## ABSTRACT

**Objective** Although value-based healthcare (VBHC) views accurate cost information to be crucial in the pursuit of value, little is known about how the costs of care should be measured. The aim of this review is to identify how costs are currently measured in VBHC, and which cost measurement methods can facilitate VBHC or value-based decision making.

**Design** Two reviewers systematically search the PubMed/MEDLINE, Embase, EBSCOhost, and Web of Science databases for publications up to 1/1/2022 and follow PRISMA guidelines to identify relevant studies for further analysis.

**Eligibility criteria** Studies should measure the costs of an intervention, treatment, or care path and label the study as 'value-based'. An inductive qualitative approach was used to identify studies that adopted management accounting techniques to identify if or how cost information facilitated VBHC by aiding decision-making.

**Results** We identified 1,930 studies, of which 215 measured costs in a VBHC setting. Half of these studies measured hospital costs (110, 51.2%) and the rest relied on reimbursement amounts. Sophisticated costing methods that allocate both direct and indirect costs to care paths were seen as able to provide valuable managerial information by facilitating care path adjustments (40), benchmarking (39), the identification of cost drivers (47), and the measurement of total costs or cost savings (26). We found three best practices that were key to success in cost measurement: process mapping (34), expert input (16), and observations (24).

**Conclusions** Cost information can facilitate VBHC. Time-driven activity-based costing (TDABC) is viewed as the best method although its ability to inform decision-making depends on how it is implemented. While costing short, or partial, care paths and surgical episodes produces accurate cost information, it provides only limited decision-making information. Practitioners are advised to focus on costing full care cycles and to consider both direct and indirect costs through TDABC.



## Strengths and limitations

- Using two independent reviewers, this systematic review analyzes all value-based healthcare studies that have to date measured costs to provide a comprehensive comparison of cost measurement methods.
- This research operationalizes the benefits of cost measurement to practitioners by identifying four mechanisms through which cost information facilitates value-based healthcare.
- By comparing the methods used in literature to collect cost information, this study identifies three best practices for practitioners and researchers.
- By limiting the search to studies labelled as ‘value-based’ in their title or abstract, this review overlooks studies that measure healthcare costs but do not explicitly relate this to value-based healthcare.
- The included studies may have achieved value-based healthcare without reporting this explicitly, and therefore may be overlooked when answering Research Question 2.

## INTRODUCTION

To make sound value-based decisions in healthcare, hospital practitioners and healthcare providers require patient-level information on the costs incurred and outcomes achieved in hospitals and other healthcare organizations [1]. This will enable care providers to steer towards better patient-reported outcome measures, better patient-reported experience measures, and clinical outcomes at equal or lower cost [2]. With detailed cost and outcome information, care paths can be continuously optimized [3]. Consequently, value-based healthcare (VBHC) is considered one solution to the financial pressures our global healthcare system places on managers and administrators [1,4,5] based on its promise to streamline care by focusing on desirable outcomes. Additionally, hospitals can benefit from cost information by gaining insight into the sources of costs that can then guide cost-containment strategies. Cost information may therefore facilitate process and quality improvement initiatives pursued by management [6–10]. Furthermore, insight into patient-level or treatment-level costs enables hospitals to negotiate appropriate prices with insurance firms, especially given the trend towards new payment models and away from fee-for-service payments [11,12]. Finally, it is suggested that such treatment-level cost information enables market-based competition among hospitals based on outcomes and prices [13].

Considerable research has addressed the outcome side of Porter's value equation [14]. This value equations suggests that healthcare should pursue 'value', where value is defined as desirable and relevant patient level outcomes divided by the costs of delivering care [1, 2]. Many studies have measured patient-level outcomes from both the patient perspective (e.g., patient-reported outcome measures, patient-reported experience measures) and clinical outcome perspective [15,16]. Less is known about the cost side of this equation. Often, the term 'cost' is conflated with the price paid by insurance firms or patients to the hospital [17,18]. However, prices do not reflect

1  
2  
3 the costs incurred by hospitals [6,19–21]. Prices paid by insurance firms are negotiated sums that  
4 include profit margins for both the insurer and the hospital [22]. They are also impacted by political  
5 factors, such as the hospital-payor mix [23] that refers to the range of private and public insurance  
6 schemes that make up the hospital's income stream. Finally, fee-for-service payments fail to  
7 account for patient-level differences in required care. Reimbursements are therefore considered a  
8 poor indicator of costs.  
9

10  
11  
12 Some authors argue for time-driven activity-based costing (TDABC) as the 'gold standard'  
13 of cost measurement in healthcare organizations [3,5,15]. TDABC, in a fine-grained way, matches  
14 direct and indirect costs to activities based on the time an activity takes. A care path is made up of  
15 many activities, each generating costs. The costs of a care path can thus be calculated by first  
16 identifying all costs relevant to each activity, and then summing these costs across the activities  
17 [22].  
18  
19

20  
21  
22 Although the research is growing and results are promising, there is relatively little  
23 empirical evidence to support TDABC being the best costing method to enable VBHC since  
24 studies rarely compare methods, and often simply use whichever system the investigated hospital  
25 or care provider uses. Costing methods differ by how they allocate indirect costs to products or  
26 services [24]. Moreover, indirect costs cannot causally be attributed to patients and therefore need  
27 to be appropriately allocated. An example of such indirect costs are the salaries of administrative  
28 personnel such as the front office staff who welcome patients, coordinate schedules, and manage  
29 equipment. While some costing methods ignore this (e.g., direct costing), other methods average  
30 indirect costs across days or months, or systematically allocate them to patients. These methods  
31 range from imprecise to fine-grained, with TDABC towards the fine-grained end of the scale. This  
32 insight is particularly relevant to healthcare since indirect costs are high. The most fine-grained  
33  
34  
35  
36  
37  
38  
39  
40  
41  
42  
43  
44  
45  
46  
47  
48  
49  
50  
51  
52  
53  
54  
55  
56  
57

1  
2  
3 method is known as activity-based costing (ABC) and allocates indirect costs based on actual units  
4  
5 of resources used per activity. In comparison, TDABC allocates indirect costs based on a per-  
6  
7 minute cost, making it considerably easier to implement. Costing methods that ignore the indirect  
8  
9 costs of a care path underestimate the true costs of the care delivered.  
10  
11

12  
13 Previous systematic reviews have found that TDABC was able to facilitate VBHC, often  
14  
15 highlighting cost savings as a result but without comparing it to alternative methods [3,4,15].  
16  
17 Therefore, we do not know how TDABC compares to other cost measurement methods currently  
18  
19 in use. While TDABC may be able to facilitate VBHC [5,15], it is unclear how its benefits compare  
20  
21 to other costing methods. For these reasons, the cost side of the value equation remains unclear.  
22  
23 To address this challenge, we pose two research questions:  
24  
25

26  
27 RQ1: Which costing methods are currently being used by practitioners to facilitate VBHC?

28  
29 RQ2: What are the consequences of applying a specific costing method in VBHC? These  
30  
31 consequences may include whether the method enables a cost reduction with equal or better  
32  
33 health outcomes or provides sufficient information to further improve a care path.  
34

35  
36 This comprehensive review draws on management accounting literature to categorize costing  
37  
38 methods reported in empirical VBHC literature published over the last two decades (January 1,  
39  
40 2003 to January 1, 2022) into cost measurement methods defined in the literature [24], such as  
41  
42 direct costing and absorption costing. Compiling studies in this way revealed four ways through  
43  
44 which cost information facilitates VBHC and three best practices.  
45  
46

## 47 **MATERIALS AND METHODS**

### 48 **Literature search strategy**

49  
50 To identify relevant studies, we systematically searched four major databases: Embase, Medline,  
51  
52 Web of Science, and CINAHL EBSCOhost. Our search string (**online supplementary appendix**)  
53  
54  
55  
56  
57

1  
2  
3 was developed by assessing previously identified relevant papers and was designed to catch all  
4 studies that address VBHC and measure the costs of an intervention, care path, or treatment by  
5  
6 including the following specific terms:  
7

8  
9  
10 \*cost\*, microcost\*, macrocost\* AND [meaning in combination with] value-based, value  
11 based, OR valuebased  
12

13 Initial search string testing showed that restricting the search to the phrase “value-based  
14 healthcare” excluded too many relevant studies because authors use phrases such as “value-based  
15 perspective” or “value-based equation” when referring to VBHC. Conversely, the term “value”  
16 was too broad and yielded more than 40,000 mostly non-specific results. By using wildcard terms  
17 indicated by stars we included many variations on the term ‘cost’.  
18  
19  
20  
21  
22  
23  
24  
25  
26

### 27 **Eligibility criteria, record selection, and data collection**

28  
29 We limited ourselves to peer-reviewed empirical research that measured or estimated costs in a  
30 VBHC context. All the inclusion criteria and variables extracted are detailed in the **online**  
31 **supplementary appendix**. The following variables, inspired by Porter [2] and the cost  
32 measurement methods defined in the accounting literature, were noted:  
33  
34  
35  
36  
37

- 38 • Cost types included (direct vs. indirect).
- 39 • Cost perspective (provider, payer, patient).
- 40 • Portion of the care path costed (full, partial).
- 41 • Cost measurement method used (as labelled by authors, verbatim).
- 42 • Cost measurement categories based on accounting definitions, e.g., direct costing,  
43 absorption costing, step-down allocation, and other recognized methods [24].
- 44 • Consequences of the costing information generated.

### 51 **Patient and public involvement**

52  
53  
54  
55 This study did not involve patients or the public in designing, executing, or reporting the research.  
56  
57

## RESULTS

### Record selection

Our four-person (ML, PP, HvE, KA) research group identified 3,275 relevant papers, of which 1,930 remained after removal of duplicates. We conducted a trial screening of 30 papers to test and further specify screening criteria. The screening process comprised two rounds as shown in **Figure 1**. In Round 1, ML and PP screened the titles and abstracts independently. When there was uncertainty about the eligibility of a paper, it was retained for full-text screening following Bramer [25]. We accepted 674 studies based on titles and abstracts, with a Cohen's kappa inter-rater reliability score of 0.78, indicating substantial agreement [26].

In Round 2, both ML and PP screened the full text of all 674 studies independently. Of these, 215 studies were seen as relevant for RQ1, with a Cohen's kappa of 0.76 between ML and PP. HvE was included in any resolution discussions needed. Finally, we assessed whether each paper discussed if or how the costing information facilitated VBHC (RQ2), yielding 49 instances where the costing method facilitated VBHC. This review was not registered.

*Figure 1 here*

**Figure 1.** PRISMA flowchart depicting the screening, exclusion and inclusion processes with two reviewers.

## Descriptive characteristics

An overview of the included studies is provided in **Table 1**. Our earliest study is from 2005, with an upsurge in studies from 2017 onwards. Just under half (n=98, 45.6%) of studies were published in the last two years. An overwhelming majority are from the US (n= 178, 82.8%). Europe is the second most common continent with 22 (10.6%) studies of which 9 (4.2%) relate to Dutch healthcare.

The three largest medical specialty groups represented are surgical (n=99; 46.0%), oncology (n=37; 17.2%), and pediatrics (n=19; 8.8%). A complete list of the 215 studies included is summarized in the **online supplementary appendix**. Extracted data are available in the **supplementary file**.

| Characteristic          | n   | %     | Characteristic                    | n  | %     |
|-------------------------|-----|-------|-----------------------------------|----|-------|
| <b>Year published</b>   |     |       | <b>Topic</b>                      |    |       |
| 2005-2009               | 3   | 1.4%  | Cardiology                        | 5  | 2.3%  |
| 2010-2013               | 6   | 2.8%  | Dermatology                       | 1  | 0.5%  |
| 2014                    | 6   | 2.8%  | Emergency & acute care            | 11 | 5.1%  |
| 2015                    | 7   | 3.3%  | Endocrinology                     | 3  | 1.4%  |
| 2016                    | 9   | 4.2%  | Surgical, <i>of which</i>         | 99 | 46.0% |
| 2017                    | 17  | 7.9%  | Appendicitis, 2                   |    |       |
| 2018                    | 28  | 13.0% | Abdominal, 6                      |    |       |
| 2019                    | 41  | 19.1% | Bariatric, 2                      |    |       |
| 2020                    | 43  | 20.0% | Cardiac/Thoracic, 12              |    |       |
| 2021                    | 51  | 23.7% | Colon/Rectal, 2                   |    |       |
| 2022 as per 1/1/2022    | 4   | 1.9%  | Endocrine, 2                      |    |       |
| <b>Geography</b>        |     |       | Ear/Nose/Throat, 2                |    |       |
| <b>Americas</b>         |     | 84.3% | Gallbladder, 2                    |    |       |
| Brazil                  | 3   |       | Liver, 2                          |    |       |
| Canada                  | 1   |       | Neurosurgical, 5                  |    |       |
| US <i>of which</i>      | 178 |       | Orthopedic arthroplasty, 25       |    |       |
| Boston, 8               |     |       | Orthopedic fracture, 12           |    |       |
| California, 18          |     |       | Orthopedic rotator cuff repair, 2 |    |       |
| New York, 23            |     |       | Orthopedic other, 3               |    |       |
| Texas, 12               |     |       | Plastic surgery, 2                |    |       |
| Pennsylvania, 9         |     |       | Spine, 13                         |    |       |
| Other states, 108       |     |       | other surgical, 5                 |    |       |
| <b>Asia</b>             |     | 2.3%  | Geriatrics                        | 1  | 0.5%  |
| China                   | 1   |       | Gynecology & obstetrics           | 8  | 3.7%  |
| Iran                    | 1   |       | Infectious disease                | 1  | 0.5%  |
| Kuwait                  | 1   |       | Internal medicine                 | 12 | 5.6%  |
| Lebanon                 | 1   |       | Multiple                          | 3  | 1.4%  |
| Singapore               | 1   |       | Nephrology                        | 1  | 0.5%  |
| <b>Europe</b>           |     | 10.6% | Neurology                         | 2  | 0.9%  |
| Andalusia               | 1   |       | Oncology                          | 37 | 17.2% |
| Germany                 | 1   |       | Ophthalmology                     | 3  | 1.4%  |
| Italy                   | 3   |       | Orthopedic                        | 1  | 0.5%  |
| Norway                  | 1   |       | Pain medicine                     | 3  | 1.4%  |
| Serbia                  | 1   |       | Pediatrics <i>of which</i>        | 19 | 8.8%  |
| Spain                   | 2   |       | Appendicitis, 3                   |    |       |
| Netherlands             | 9   |       | Emergency & acute care, 2         |    |       |
| UK                      | 4   |       | Neonatal, 3                       |    |       |
| <b>Oceania</b>          |     | 1.9%  | Oncology, 1                       |    |       |
| Australia               | 4   |       | Surgical, 5                       |    |       |
| <b>Transcontinental</b> |     | 0.9%  | Surgical, plastic surgery, 2      |    |       |
| Russia                  | 1   |       | Other pediatric, 3                |    |       |
| Turkey                  | 1   |       | Toxicology                        | 1  | 0.5%  |
|                         |     |       | Urology                           | 4  | 1.9%  |

**Table 1.** Characteristics of value-based healthcare studies that measure costs (n=215).



## Which cost measurement methods are currently being used to facilitate VBHC?

To answer RQ1, we look at how costs were measured. A summary of our findings is presented in **Table 2**. The literature contains many overlapping and contradictory terms, as ‘costs’ can refer to insurer costs, reimbursements, hospital costs, or patient costs. About half of the studies (n=110, 51.2%) take a provider perspective, with costs calculated for the hospital or care facility. Many studies use charges or payments because hospital cost data are unavailable, considering charges to be a relevant proxy. Some studies use terms such as ‘costs’, ‘charges’, ‘prices’, ‘payments’, and ‘reimbursements’ interchangeably, making it difficult to differentiate [17,18,27–30]. For example, Jain et al. [17] stated, “The terms reimbursement, cost, and payment have been used interchangeably throughout the text to represent actual amounts paid by insurers.” Similarly, Robles et al, [30] explained, “Total hospital charges were utilized in this standardized costing analysis. Hospital charge data provides a relative measure of the ‘cost’ of episodes of care, as actual cost data are generally not ascertainable in the healthcare setting.” When calculating costs using TDABC, Ahluwalia et al. [31] called these costs ‘prices.’ To try to address this confusion, some recent studies refer to provider costs as the ‘true cost’ of care [6,7,9,19]. Some studies that compare several cost types [19,20] also differentiate ‘traditional hospital accounting’ costs from ‘true costs’ calculated with TDABC [6,9,20,32,33].

| Characteristic                            | Studies |                     | Perspectives  |            |
|-------------------------------------------|---------|---------------------|---------------|------------|
|                                           | n       | %                   | n             | %          |
| Cost perspective                          |         |                     |               |            |
| Provider                                  | 110     | 51.2%               | 111           | 51.6%      |
| Insurer                                   | 103     | 47.9%               | 106           | 49.3%      |
| Patient                                   | 2       | 0.9%                | 5             | 2.3%       |
| N*                                        | 215     |                     | 222           |            |
|                                           |         | All studies (n=215) | Provider only | Payer only |
| Cost types included                       |         |                     |               |            |
| Direct                                    | 28      | 13.0%               | 24            | 2          |
| Direct and indirect                       | 177     | 81.9%               | 84            | 93         |
| Unspecified                               | 10      | 4.6%                | 2             | 8          |
| Costs measurement implementation          |         |                     |               |            |
| No, costs measured for purpose of study   | 34      | 15.7%               | 33            |            |
| Yes, costing method is implemented        | 39      | 17.6%               | 39            |            |
| Unspecified or not applicable             | 142     | 66.2%               | 38            | 102        |
| Costs coverage                            |         |                     |               |            |
| Full care path                            | 47      | 21.8%               | 30            | 16         |
| Full care path (full surgical episode)    | 17      | 7.4%                | 13            | 4          |
| Partial care path (full surgical episode) | 22      | 8.3%                | 19            | 3          |
| Partial care path                         | 86      | 42.1%               | 37            | 49         |
| Unspecified                               | 43      | 19.9%               | 11            | 31         |

*Note:* N differs between studies and perspectives because seven studies measured two cost types.

**Table 2.** Characteristics of costing methods in value-based health care

We categorized studies based on the cost types included. Both direct and indirect costs were considered in 177 (81.9%) studies, while 28 (13.0%) papers only included direct costs.

Next, we looked at whether costs were calculated for a complete care path. We found 64 (29.8%) studies that measured costs for a full care path, of which 16 (7.4%) refer to full surgical episodes and label them as such without considering all the pre- or post-surgical costs. The remaining 86 (42.1%) measure costs of a partial care path.

**Table 3** categorizes studies based on the costing method used. In those papers measuring costs within a care provider, we identified two clear categories that were in line with the

1  
2  
3 management accounting literature [24]. The first is ‘direct costing’ (n=23), where direct costs of  
4 care are summed and indirect costs ignored. This implies that, if costs cannot be causally attributed  
5 to the treatment of a specific patient, they are not considered and hence overlooked when making  
6 managerial decisions [24].  
7  
8  
9  
10  
11  
12

13 The second category of studies considers both direct and indirect costs and uses ‘absorption  
14 costing’, whereby indirect costs are allocated to patients based on an allocation key (a type of  
15 formula used for allocating indirect costs) [31]. These studies include but are not limited to  
16 TDABC (n=31) and ABC (n=7), where costs are allocated to individual care activities (such as a  
17 consultation or treatment step). The remaining absorption costing papers (n=47) also consider  
18 direct and indirect costs but do not report how indirect costs are allocated to activities. In the  
19 absorption costing studies, authors may state that cost information was calculated based on  
20 diagnosis-related group costs, micro-costing, bottom-up clinical costing, or hospital accounting  
21 systems not further classified. A full list of all the terms used is presented in the **online**  
22 **supplementary appendix.**  
23  
24  
25  
26  
27  
28  
29  
30  
31  
32  
33  
34  
35  
36  
37  
38  
39  
40  
41  
42  
43  
44  
45  
46  
47  
48  
49  
50  
51  
52  
53  
54  
55  
56  
57  
58  
59  
60

| Perspective     | Method                                     | n  |
|-----------------|--------------------------------------------|----|
| <i>Provider</i> | Direct costs only                          |    |
|                 | Direct costing                             | 23 |
|                 | Absorption costing                         |    |
|                 | ABC                                        | 7  |
|                 | TDABC                                      | 31 |
|                 | Other                                      | 47 |
|                 | Not specified                              | 3  |
| <i>Insurer</i>  | Charges and reimbursements                 |    |
|                 | Charges, reimbursements, claims            | 81 |
|                 | Charges adjusted with cost-to-charge ratio | 25 |
| <i>Patient</i>  | Out-of-pocket costs to patient             | 5  |

*Note:* The total number of studies here is 222 because 7 studies measure two cost types. Studies are classified based on actual costs included and methods described, not necessarily the labels used by the studies' authors.

**Table 3.** Overview of cost measurement methods used in value-based healthcare

### How do these costing methods facilitate VBHC?

To answer RQ2, we extracted all the consequences related to the costing method as described in the papers. Here, like Etges et al. [3], we were looking for how the costing information facilitated VBHC. Note that not all the studies included to address RQ1 describe facilitating VBHC or the consequences of the cost information generated. The reported consequences were grouped inductively, revealing four categories:

1. Identification of cost drivers, in terms of cost items (e.g., staff costs, material costs) or activities (e.g., surgery, initial consult; n=48).
2. Comparison of costs across patient groups, care providers, or procedures (n=39).
3. Measured cost difference, or cost saving, while achieving equal or better care (n=26).
4. Suggested or measured care path improvements (n=40).

These studies are presented in **Table 4**. The studies reporting these facilitators used ABC (n=6), TDABC (n=29), other absorption costing methods (n=12), or direct costing (n=3).

| Study Characteristics |                                           |                |                 |        | Best practices |     |     |     | Value-Based consequences of costing information |                                                               |     |                                                                                                   |                      |
|-----------------------|-------------------------------------------|----------------|-----------------|--------|----------------|-----|-----|-----|-------------------------------------------------|---------------------------------------------------------------|-----|---------------------------------------------------------------------------------------------------|----------------------|
|                       | Medical Specialty                         | Costing method | period          | Centre | Study type     | PM  | EI  | DO  | CG                                              | Compare costs across                                          | ICD | MPS                                                                                               | Care path adjustment |
| [34]                  | Internal medicine                         | TDABC          | partial         | single | retro          | yes | yes |     | items, activities                               |                                                               | yes |                                                                                                   | suggested            |
| [33]                  | Surgical, orthopedic, rotator cuff repair | TDABC          | full (FSE)      | single | retro          | yes |     | yes | items, activities                               | surgeons, two alternative treatments                          | yes | yes, ± \$727 about the mean per patient                                                           | suggested            |
| [4]                   | Cardiology, surgical                      | TDABC          | full (FSE)      | multi  | retro          | yes | yes | yes | items, activities                               | hospitals, procedures                                         | yes | yes, estimate 51.0% of procedure cost                                                             | yes                  |
| [10]                  | Oncology                                  | TDABC          | full            | single | retro          | yes | yes | yes | items, activities                               | treatment care paths                                          | yes | \$2,302 (25.0%) difference across treatments                                                      | suggested            |
| [35]                  | Surgical, orthopedic                      | TDABC          | full (FSE)      | single | retro          | yes |     |     | items, activities                               | patients                                                      | yes |                                                                                                   | suggested            |
| [36]                  | Surgical, orthopedic                      | TDABC          | full (FSE)      | single | retro          | yes |     |     | items, activities                               | patients                                                      | yes |                                                                                                   | suggested            |
| [19]                  | Surgical, orthopedic                      | TDABC          | full (FSE)      | single | retro          | yes |     | yes | items, activities                               | costing methods (TA and TDABC)                                | yes |                                                                                                   | suggested            |
| [20]                  | Surgical, orthopedic                      | TDABC          | full (FSE)      | single | retro          | yes |     | yes | items, activities                               | five treatments, cost vs. reimbursement                       | yes |                                                                                                   |                      |
| [37]                  | Pediatric, surgical, plastic surgery      | TDABC          | full (FSE)      | multi  | pro            | yes |     | yes | items, activities                               | treatment care paths                                          | yes | up to \$8900, but long-term outcomes yet unknown                                                  | suggested            |
| [38]                  | Emergency & acute care                    | TDABC          | full (multiple) | multi  | retro          | yes | yes | yes | items, activities                               | eight care paths for acute ureteral stones (patient journeys) | yes | yes, \$6614 difference across care paths                                                          | suggested            |
| [39]                  | Surgical, orthopedic                      | TDABC          | full (FSE)      | single | retro          | yes |     | yes | items, activities                               | surgeons                                                      | yes |                                                                                                   | suggested            |
| [40]                  | Oncology                                  | TDABC          | partial         | single | pro            | yes | yes | yes | items, activities                               | treatments and individual care paths                          | yes | yes, cost difference of up to 3.33 times, depending on case mix                                   | suggested            |
| [41]                  | Oncology (incl. surgery)                  | TDABC          | full            | single | retro          | yes |     | yes | items, activities                               |                                                               | yes |                                                                                                   | suggested            |
| [42]                  | Oncology                                  | TDABC          | partial (FSE)   | single | retro          | yes |     |     | items                                           | pre and post implementation                                   | yes | yes, mean cost savings of €309 per patient                                                        | yes                  |
| [43]                  | Cardiology                                | AC (other)     | partial         | multi  | retro          |     |     |     | items                                           | patient journeys                                              | yes |                                                                                                   | suggested            |
| [44]                  | Emergency & acute care                    | AC (other)     | partial         | single | retro          | yes |     |     | items                                           | surgeons                                                      | yes |                                                                                                   |                      |
| [45]                  | Surgical, bariatric                       | AC (other)     | full (FSE)      | single | retro          |     |     |     | items                                           | treatment                                                     | yes |                                                                                                   |                      |
| [46]                  | Gynecology & obstetrics                   | AC (other)     | full            | single | retro          | yes |     |     | items, activities                               | procedures                                                    | yes | yes, \$967 per patient                                                                            | suggested            |
| [47]                  | Emergency & acute care                    | AC (other)     | partial         | single | retro          |     |     |     | items, activities                               |                                                               | yes |                                                                                                   |                      |
| [48]                  | Surgical, colorectal                      | AC (other)     | partial (FSE)   | single | retro          |     |     |     | items                                           | intervention                                                  | yes | yes, reduced variable cost, similar total cost                                                    | yes                  |
| [21]                  | Surgical, orthopedics, fracture           | ABC            | partial (FSE)   | single | retro          |     |     |     | items                                           | patients, patient groups, demographics                        | yes |                                                                                                   |                      |
| [49]                  | Surgical, orthopedic, arthroplasty        | ABC            | full (FSE)      | single | both           |     | yes | yes | items, activities                               | treatment care paths                                          | yes | estimate €2,054,000 annually                                                                      | yes                  |
| [50]                  | Surgical, spine                           | ABC            | Full            | single | retro          | yes |     |     | items, activities                               | patients, patient groups                                      | yes |                                                                                                   | suggested            |
| [6]                   | Pediatric, surgical                       | TDABC          | full (FSE)      | single | both           | yes |     | yes | items, activities                               | costing methods (TA and TDABC)                                | yes | 20.0% and without care path alteration                                                            | suggested            |
| [51]                  | Oncology                                  | TDABC          | full (FSE)      | single | retro          | yes | yes | yes | items, activities                               | treatment care paths                                          | yes | yes, estimate for each 10.0% decrease in case duration, total costs could decrease by about 8.0%. | suggested            |
| [31]                  | Surgical, orthopedic                      | TDABC          | full (FSE)      | single | pro            | yes | yes | yes | items, activities                               | treatment care paths                                          | yes | £2,018 per patient                                                                                | suggested            |
| [52]                  | Pediatric, neonatal                       | TDABC          | partial         | single | retro          | yes | yes | yes | items, activities                               | Pre and post intervention                                     | yes | yes, 36.0% or \$92,000 per tracheostomy care cycle                                                | yes                  |
| [53]                  | Surgical, cardiac/thoracic                | AC (other)     | partial         | multi  | retro          | yes |     |     | items                                           | patients, implant devices                                     | yes |                                                                                                   | suggested            |

|      |                                   |                |                 |              |       |              |           |           |                   |                                                            |           |                                                                      |                        |           |
|------|-----------------------------------|----------------|-----------------|--------------|-------|--------------|-----------|-----------|-------------------|------------------------------------------------------------|-----------|----------------------------------------------------------------------|------------------------|-----------|
| [54] | Oncology, surgical                | AC (other)     | partial         | single       | retro |              |           |           | items             |                                                            | yes       | yes, multiple                                                        |                        |           |
| [55] | Multiple                          | TDABC          | full            | multi, pilot | retro | yes          | yes       | yes       | items, activities | before and after intervention (IPUs)                       | yes       | yes, quarterly costs declined                                        | suggested              |           |
| [56] | Oncology                          | TDABC          | partial (PSE)   | single       | pro   | yes          |           | yes       | items, activities | treatment care paths (parallel vs. induction design in OR) | yes       | yes, estimate OR time reduction of 55 min, or \$,2818 missed revenue | suggested              |           |
| [57] | Surgical, orthopedics fracture    | TDABC          | partial (FSE)   | single       | both  | yes          |           |           | items             |                                                            | yes       |                                                                      | suggested              |           |
| [58] | Surgical, foot debridement        | TDABC          | partial (FSE)   | single       | retro |              |           | yes       | items             | before and after intervention                              | yes       |                                                                      | yes                    |           |
| [59] | Ophthalmology                     | TDABC          | full            | single       | retro | yes          | yes       | yes       | items, activities |                                                            | yes       |                                                                      | suggested              |           |
| [60] | Gynecology & obstetrics, surgical | AC (other)     | partial (FSE)   | single       | retro |              |           |           | items             |                                                            | yes       |                                                                      | suggested              |           |
| [61] | Gynecology & obstetrics, surgical | AC (other)     | partial (FSE)   | single       | retro |              |           |           | items             |                                                            | yes       |                                                                      |                        |           |
| [62] | Multiple                          | Direct costing | partial         | single       | retro |              |           |           | items             |                                                            | yes       |                                                                      |                        |           |
| [63] | Surgical, orthopedic              | Direct costing | full (FSE)      | multi        | retro |              |           |           | items             | intervention                                               |           | yes, £255 per patient                                                | yes                    |           |
| [5]  | Surgical, carpal tunnel release   | TDABC          | partial (FSE)   | multi        | retro | yes          |           | yes       | items, activities | multiple treatment care paths                              | yes       | yes, 70.9% (\$27,103) and 31.6% (\$178)                              | yes                    |           |
| [64] | Surgical, appendicitis            | AC (other)     | partial (FSE)   | single       | pro   |              | yes       | yes       | items             | pre and post intervention (dashboard)                      | yes       | yes, decreased by \$496 per operation                                | yes                    |           |
| [65] | Surgical, orthopedic              | Direct costing | partial (FSE)   | single       | retro | yes          |           |           | items             | intervention                                               | yes       |                                                                      |                        |           |
| [8]  | Urology                           | TDABC          | partial         | single       | pro   | yes          |           | yes       | items, activities |                                                            | yes       | yes, estimate two hours per cycle                                    | suggested              |           |
| [66] | Pediatrics, appendicitis          | TDABC          | full (FSE)      | single       | pro   | yes          | yes       | yes       | items, activities | treatment care paths (pre and post intervention)           | yes       | 11.0% cost reduction, and 51.0% hospitalization time reduction       | yes, several           |           |
| [67] | Urology                           | AC (other)     | partial         | multi        | retro |              | yes       |           | items             |                                                            |           |                                                                      |                        |           |
| [7]  | Oncology, surgical, 11 surgeries  | TDABC          | Partial (FSEs)  | single       | retro | yes          |           |           | items, activities | potential staffing ratios                                  | yes       | estimate 13.0-28.0% per surgery type                                 | modelled and suggested |           |
| [9]  | Oncology                          | TDABC          | full            | single       | retro | yes          | yes       | yes       | items, activities | treatments (high-dose vs. low-dose brachytherapy)          | yes       | \$2,668 difference across treatments                                 | yes                    |           |
| [68] | Urology                           | TDABC          | partial (FSE)   | single       | retro | yes          | yes       |           | items, activities | five treatment care paths                                  | yes       | yes, 400.0% increase from least to most expensive pathways           | suggested              |           |
| [32] | Surgical, neurosurgery            | ABC            | partial (FSE)   | single       | retro | yes          |           |           | items, activities | patients                                                   | yes       | yes, 25.0%                                                           | yes, several           |           |
| [69] | Surgical, neurosurgery            | ABC            | partial (FSE)   | single       | retro | yes          |           |           | items, activities | patients                                                   | yes       |                                                                      | suggested              |           |
| [70] | Pediatric plastic surgery         | ABC            | partial, 1 year | single       | retro |              |           |           | items             | patients                                                   | yes       |                                                                      | suggested              |           |
|      |                                   |                |                 |              |       | <b>Count</b> | <b>34</b> | <b>16</b> | <b>24</b>         |                                                            | <b>39</b> | <b>47</b>                                                            | <b>26</b>              | <b>40</b> |

*Note:* ABC: Activity-Based costing; TDABC: Time-Driven activity-based costing; FSE: Full surgical episode; AC (other): Absorption costing, other; PSE: Partial surgical episode; Retro: Retrospective; Pro: Prospective; PM: Process mapping; EI: Expert input; DO: Direct Observation; CG: Cost grouping, cost items only or activities; ICD: Identify cost drivers; MPS: Measured provider cost savings (at equal or better care). Costing methods are classified based on actual reported costs and methods applied, not necessarily the labels used by authors.

**Table 4.** Costing method applications, method used, and consequences (ordered by year).

### *Activity-based costing*

The six studies applying ABC justified this on the basis that it was the care provider's existing costing method. Three of these studies measured costs for a full surgical episode [21,32,69] as part of a longer care path, two measured costs for a full care path [49,50], and one measured costs of a partial care path [70]. While these studies all applied ABC, the ability to facilitate VBHC differed. Jacobs et al. [50] measured costs for a complete care path for patients with adult spinal deformity, a complex care path spanning about one year. The authors compared costs across patient groups and patients, identified major cost drivers, and suggested where to concentrate cost containment. Similarly, McLaughlin and colleagues [32,69] measured costs, identified cost drivers, and evaluated targeted cost containment initiatives. In one paper [32], the cost containment initiatives were informed by the cost information: activities with the highest costs were targeted for savings and a 25% reduction in total costs was achieved. In the other paper [69] they identified comorbidities and demographics that were strongly related to the total costs of patients undergoing neurosurgery, whereas Wise et al. [21] did not for geriatric hip-fracture patients while identifying cost drivers and comparing costs across patient groups. Vanni et al. [49] successfully predicted about €2 million annual cost savings associated with an enhanced recovery pathway.

### *Time-driven activity-based costing*

The majority of the papers used to answer RQ2 involved TDABC. Significant cost drivers were identified linked to activities in a care path, and some suggested where to target improvement initiatives [4,6–8,10,33,40,59]. Many of the TDABC studies were able to suggest [6,8,10,19,33–38,40,41,51,55–59,68] or measure [5,9,31,42,52,66] care path improvements (see **Table 4**).

The lengths and specificities of the care path costs varied widely. Some studies were narrow in scope, calculating costs for subsections of a single care path or surgical procedure [6,8,38,39,56].

1  
2  
3 Isaacson et al. [8] calculated costs for cleaning a single reusable piece of equipment, while others  
4  
5 costed single surgical days [6], compared alternative surgeons [39], or anesthesia solutions within  
6  
7 a care path [56]. Within this group, McClintock et al. [38] took the broadest perspective by  
8  
9 mapping individual patient journeys.  
10  
11

12  
13 The largest group (n=10) of TDABC studies measured costs across care paths within a  
14  
15 single provider and for a single diagnosis [9,10,31,33,37,40–42,51,66]. Typically, these studies  
16  
17 compared costs between a new intervention and the ‘usual’ care [9,10,31,51,52,66], or between  
18  
19 alternative care paths [33,37,40,42] in order to measure cost savings.  
20  
21

22  
23 Some studies were broader in scope, costing multiple care paths or treatments within one  
24  
25 specialty [5,7,20,68], an entire department [34,59], multiple practice units [55], or providers [4].  
26  
27 Some compared ‘true costs’ calculated using TDABC across care providers within specialties or  
28  
29 care paths [4,37], while others argued that TDABC costs were too subjective to be compared across  
30  
31 hospitals [10,38]. While most studies compared costs across care paths, some also compared costs  
32  
33 across patient groups [19,35,36], or even individual patient journeys [38,40].  
34  
35  
36

37  
38 Technology played a prominent role in studies aiming to reduce costs. One study was able  
39  
40 to suggest how to use technology more efficiently [6], and some, by integrating technological  
41  
42 investments in the calculated TDABC costs, show how technology can reduce costs [37,40,51].  
43  
44

45  
46 Conversely, studies using unspecified absorption methods [60,61] did not include  
47  
48 investments in technology, and this is surprising since absorption costing methods require indirect  
49  
50 costs to be allocated.  
51

52  
53 ***Analyses enabled by activity-based and time-driven activity-based costing***  
54  
55  
56  
57



1  
2  
3 Several of the ABC and TDABC studies compared costs calculated using traditional accounting  
4 costs [6,19,20] or reimbursement amounts [20,21] and found that prices do not equal costs. Some  
5 carried out quantitative analyses using cost information generated using ABC or TDABC  
6 including regression analyses to identify correlations [7,33,35,36,40], compare patient groups  
7 [20,35,36], and compare costs and outcomes across a matched patient sample [40].  
8  
9

10  
11  
12  
13  
14  
15 Two recent studies [33,57] have conducted patient-level value analyses (PLVAs),  
16 comparing patient-reported outcomes with patient-level TDABC costs. Wise et al. [33] did so for  
17 rotator cuff repair surgery over a period of one year, while McCreary et al. [57] analyzed ankle  
18 fractures. Both studies found costs to be unrelated to patient-reported outcome measures,  
19 highlighting the need for further research. This suggests that patient-reported outcome measures  
20 are not strongly associated with the costs of the care delivered, and that patient satisfaction may  
21 depend on other factors such as their perceived experience with healthcare professionals.  
22  
23  
24  
25  
26  
27  
28  
29

### 30 31 *Other absorption costing methods and direct costing*

32  
33  
34 Other absorption costing methods reported in the studies were labelled as micro-costing (n=5),  
35 bottom-up clinical costing [47], or were described but not labelled (n=6). Most were able to  
36 identify cost drivers (n=12, for details see **Table 4**) and some compared costs within providers.  
37  
38  
39 Notably, Robinson et al. [64] used the cost information to build and evaluate a dashboard that  
40 provides real-time feedback to surgeons during operations and monthly summaries and thereby  
41 decreases costs significantly. Some studies omitted certain cost categories such as equipment [61].  
42  
43  
44  
45  
46  
47  
48 Direct costing enabled cost drivers to be identified [62,63,65], and in some cases granular cost  
49 measurement.  
50

### 51 52 *Best practices*

1  
2  
3 Having identified these four facilitators, we compared studies to find common practices. This is  
4 particularly useful because costing methods are not labelled consistently. For example, many  
5 studies refer to ABC as ‘bottom-up costing.’ To look beyond labels, we compared the actual  
6 methodologies used to measure costs. We found that studies that were able to facilitate VBHC  
7 used process mapping (n=34), expert input (n=17), and/or direct observations (n=24) when  
8 measuring costs. These practices overlap with TDABC best practices, but are not exclusive to  
9 TDABC, as shown in **Table 4**.  
10  
11  
12  
13  
14  
15  
16  
17  
18  
19

20 Studies that made specific care path improvement suggestions used process mapping, and  
21 especially those involving multidisciplinary teams reported significant benefits [4,9,10,19]. This  
22 approach enabled experts (doctors, care professionals, administrators) with the required  
23 knowledge and experience to reflect critically on the process [4,9,10,19], resulting in actionable  
24 suggestions. In comparison, studies that did not use process mapping tended to suggest minimizing  
25 high-cost items (e.g., total operating time, nursing costs) but were unable to couple these  
26 suggestions to specific activities or to chronological points in the care path. Commenting only on  
27 cost items, and not identifying chronological points, limits the ability of cost information to steer  
28 management towards where to focus process improvement initiatives.  
29  
30  
31  
32  
33  
34  
35  
36  
37  
38  
39  
40

41 Expert input while creating process maps or measuring costs was often cited by authors as  
42 valuable, especially for estimating preparation time or other behind-the-scenes activities that do  
43 not involve the patient but are critical to delivering care. Some studies that could not call on expert  
44 input cited this as a limitation. A few cases also evaluated the impact of costing information, for  
45 example by involving experts to evaluate a dashboard [64].  
46  
47  
48  
49  
50  
51  
52

53 Finally, some studies involved direct observations, particularly those that calculated  
54 process times to the minute or measured the costs of individual patient journeys.  
55  
56  
57

## DISCUSSION

This review focused on VBHC studies that have measured or estimated costs, and on identifying which costing methods can facilitate VBHC. By assessing the consequences of the costing methods used, we were able to identify characteristics of costing methods that do facilitate VBHC.

Previous research found that TDABC can facilitate VBHC through cost containment and process improvements [3,15]. We built on this by comparing value-based consequences across costing methods. While the field is young and alternatives seem limited, we have found considerable evidence that TDABC and ABC can indeed facilitate VBHC. As previously noted, TDABC is considerably easier to implement than ABC, which leads us to recommend it over ABC. We found no well-documented alternatives to TDABC or ABC in our review. However, not all the TDABC studies delivered the facilitating factors we have identified. We therefore emphasize the need to follow TDABC guidelines carefully and to explicitly document methods used. Several of the studies in this review simply stated that TDABC was applied, outsourced, used with incomplete costs, or used without listing exact cost rates.

The start and end points of care paths tend to be well documented by authors but are inconsistent. To view costs in relation to outcomes, as suggested by Porter [2], the total costs from start to finish of a trajectory should be included [71]. In many studies, the start and end points of cost measurement windows seem somewhat arbitrary but are still labeled as full care paths. Consequently, this results in inconsistencies across studies, hindering comparisons. Encouragingly, some of the more recent studies have measured costs across a genuine full care path and future research should do the same, explicitly defining start and end points. This would enable consistent comparisons across providers. As with the ICHOM standard outcome sets produced by the International Consortium for Health Outcomes Measurement, costs could be

1  
2  
3 catalogued and compared over full care paths. Indeed, in a recent expert consensus study, experts  
4  
5 agreed on the need to focus on full care paths [71].  
6  
7

8  
9 Furthermore, we can see a trade-off in the specificity and length of the care path costed.  
10  
11 Studies that measure costs for elements of a care path (such as a surgical operation) can provide  
12  
13 detailed costs for that portion of the care path, but not total care costs for a patient because the  
14  
15 remainder of the care path is not included. Some surgical studies measured costs for partial care  
16  
17 paths, and often concluded that operating theatre time should be minimized due to high surgeon  
18  
19 and operating theatre costs. However, this conclusion has limited relevance for the value equation  
20  
21 [13] because it does not provide cost information for an entire care path, or advice on how to  
22  
23 circumvent surgery.  
24  
25

26  
27  
28 Studies that cost complete care paths appear to use less-detailed costing methods (due to  
29  
30 the sheer length of the care path) but are able to compute total costs of a patient's care. This enabled  
31  
32 benchmarking across providers, as well as cost comparisons of new vs. standard care, or of  
33  
34 treatment alternatives. This allowed providers to steer towards lower-cost outcomes to maximize  
35  
36 value. Future research should focus on measuring costs for full care paths, and on comparing costs  
37  
38 to outcomes as demonstrated in some of the more recently published studies in our review  
39  
40 [33,40,57].  
41  
42  
43

44  
45 Our review highlights the need to involve medical professionals in this process, both when  
46  
47 implementing costing methods as well as when evaluating the results. Future cost measurement  
48  
49 studies, and hospitals looking to implement TDABC, should involve multidisciplinary teams.  
50  
51 Studies that have involved medical professionals in the process of measuring costs and then using  
52  
53 the findings were able to improve care paths through improvement initiatives and/or dashboards.  
54  
55 This suggests that generating and using costing information should be viewed as a process. Future  
56  
57

1  
2  
3 qualitative research should follow this process to better understand the mechanisms through which  
4  
5 cost information impacts decision making, and the impact that staff involvement has on cost  
6  
7 containment. Previous research suggests that staff involvement is critical as it builds trust in the  
8  
9 accuracy of the data [72].  
10

### 11 12 **Limitations and future research**

13  
14  
15  
16 We must acknowledge several limitations related to the scope, breadth, and quality of the included  
17  
18 studies. First, our search strategy will have missed studies that measure costs but do not label the  
19  
20 study as VBHC-oriented. Not all TDABC studies make value-based claims or contributions and  
21  
22 may therefore be overlooked in our review. Additionally, not all studies explicitly discuss the  
23  
24 impact or consequences of the costing method applied, which may impact our findings. Future  
25  
26 qualitative research could usefully investigate TDABC implementations and evaluate whether the  
27  
28 facilitating factors found in this review are achieved. Second, sophisticated methods such as  
29  
30 TDABC are currently only used with predictable and/or short care paths such as orthopedic  
31  
32 surgery. Further research testing the feasibility and practicality of TDABC in different settings,  
33  
34 such as emergency on-call care, or longer care paths such as fertility treatment, is warranted.  
35  
36 Further, our findings may have limited generalizability across medical specialties as indicated in  
37  
38 **Table 1**. Finally, we have relied on the reporting of authors whose style and quality differs across  
39  
40 disciplines and journals. To an extent we circumvented this limitation by looking beyond the cost  
41  
42 measurement labels used by authors, extracting the costs included and methods used, and then  
43  
44 categorizing them using established accounting definitions. However, we cannot exclude the  
45  
46 possibility of errors due to a lack of explicit reporting in some of the studies reviewed.  
47  
48  
49  
50  
51

### 52 53 **Conclusions**

1  
2  
3 This systematic review reveals that cost information, at the treatment or patient level, for complete  
4 care paths does enable value-based decision making through several mechanisms. Such cost  
5 information can direct quality and process improvement initiatives alongside informing  
6 appropriate reimbursement levels. In the pursuit of VBHC, practitioners and academics are advised  
7 to apply ABC or TDABC to estimate costs, using process mapping, expert input, and observations,  
8 rather than relying on pricing information.  
9  
10  
11  
12  
13  
14  
15  
16  
17  
18  
19  
20  
21  
22  
23  
24  
25  
26  
27  
28  
29  
30  
31  
32  
33  
34  
35  
36  
37  
38  
39  
40  
41  
42  
43  
44  
45  
46  
47  
48  
49  
50  
51  
52  
53  
54  
55  
56  
57  
58  
59  
60

1  
2  
3 **Patient and public involvement:** This study did not involve patients or the public in designing,  
4 executing or reporting of the research.  
5

6 **Acknowledgements:** We thank W.M. Bramer, biomedical information specialist from the  
7 Erasmus MC. We also thank our fellow members of the value-based healthcare consortium,  
8 involving Amsterdam UMC, Erasmus MC, Radboudumc and Erasmus University Rotterdam, led  
9 by J.G.M. Jelsma and M.C. de Bruijne.  
10

11  
12 **Funding:** This work was supported by the Dutch Ministry of Health, Welfare and Sport (VWS)  
13 through grant number 330843.  
14

15 **Data sharing:** The supplementary appendix and data file are available from the Erasmus Data  
16 Repository (DOI: 10.25397/eur.20279883).  
17

18  
19 **Competing interests:** The third author, KA, was a speaker at the 2022 TDABC conference and  
20 was reimbursed for his stay in Lisbon by the TDABC consortium. Other authors: none declared.  
21

22 **Contributors:** ML: study design, screening of titles and abstracts for inclusion, data analysis and  
23 interpretation, writing. PP: screening of titles and abstracts for inclusion, assisted in writing. KA:  
24 study design, assisted in interpretation of results, assisted in writing. HvE: study design,  
25 screening of titles and abstracts for inclusion, data analysis and interpretation, assisted in writing.  
26  
27

28 **Patient consent for publication:** Not applicable.  
29

30 **Ethics approval:** Ethical approval was not required for this systematic review as this review  
31 used data from the public domain (published articles).  
32  
33

#### 34 **ORCID ID**

35 Maura Leusder 0000-0001-7134-1003

36 Petra Porte 0000-0003-0228-1013

37 Kees Ahaus 0000-0001-9973-3746

38 Hilco van Elten 0000-0003-3909-5521  
39  
40  
41  
42  
43  
44  
45  
46  
47  
48  
49  
50  
51  
52  
53  
54  
55  
56  
57  
58  
59  
60

## REFERENCES

- 1 Kaplan, Porter. How to solve the cost crisis in health care. *Harv Bus Rev* 2011;**89**:46–52, 54, 56-61 passim. <https://www.ncbi.nlm.nih.gov/pubmed/21939127>
- 2 Porter ME. What Is Value in Health Care? *N Engl J Med* 2010;**363**:2477–81. doi:10.1056/NEJMp1011024
- 3 Etges APB da S, Ruschel KB, Polanczyk CA, *et al.* Advances in Value-Based Healthcare by the Application of Time-Driven Activity-Based Costing for Inpatient Management: A Systematic Review. *Value Health* 2020;**23**:812–23. doi:10.1016/j.jval.2020.02.004
- 4 Etges, Cruz LN, Schlatter R, *et al.* Time-driven activity-based costing as a strategy to increase efficiency: An analyses of interventional coronary procedures. *Int J Health Plann Manage* Published Online First: 9 September 2021. doi:10.1002/hpm.3320
- 5 Martin JA, Mayhew CR, Morris AJ, *et al.* Using Time-Driven Activity-Based Costing as a Key Component of the Value Platform: A Pilot Analysis of Colonoscopy, Aortic Valve Replacement and Carpal Tunnel Release Procedures. *J Clin Med Res* 2018;**10**:314–20. [http://www.ncbi.nlm.nih.gov/entrez/query.fcgi?holding=inleurlib\\_fft&cmd=Retrieve&db=PubMed&dopt=Citation&list\\_uids=29511420](http://www.ncbi.nlm.nih.gov/entrez/query.fcgi?holding=inleurlib_fft&cmd=Retrieve&db=PubMed&dopt=Citation&list_uids=29511420)
- 6 Bodar YJL, Srinivasan AK, Shah AS, *et al.* Time-Driven activity-based costing identifies opportunities for process efficiency and cost optimization for robot-assisted laparoscopic pyeloplasty. *J Pediatr Urol* 2020;**16**:460.e1-460.e10. doi:10.1016/j.jpuro.2020.05.146
- 7 French KE, Guzman AB, Rubio AC, *et al.* Value based care and bundled payments: Anesthesia care costs for outpatient oncology surgery using time-driven activity-based costing. *Healthc (Amst)* 2016;**4**:173–80. doi:10.1016/j.hjdsi.2015.08.007
- 8 Isaacson D, Ahmad T, Metzler I, *et al.* Defining the Costs of Reusable Flexible Ureteroscope Reprocessing Using Time-Driven Activity-Based Costing. *J Endourol* 2017;**31**:1026–31. doi:10.1089/end.2017.0463
- 9 Ilg AM, Laviana AA, Kamrava M, *et al.* Time-driven activity-based costing of low-dose-rate and high-dose-rate brachytherapy for low-risk prostate cancer. *Brachytherapy* 2016;**15**:760–7. <https://www.ncbi.nlm.nih.gov/pubmed/27720202>
- 10 Dziemianowicz M, Burmeister J, Dominello M. Examining the Financial Impact of Altered Fractionation in Breast Cancer: An Analysis Using Time-Driven Activity-Based Costing. *Pract Radiat Oncol* 2021;**11**:245–51. doi:10.1016/j.prro.2021.01.003
- 11 Cattel D, Eijkenaar F. Value-Based Provider Payment Initiatives Combining Global Payments With Explicit Quality Incentives: A Systematic Review. *Med Care Res Rev* 2020;**77**:511–37. doi:10.1177/1077558719856775



- 12 Counte MA, Howard SW, Chang L, *et al.* Global Advances in Value-Based Payment and Their Implications for Global Health Management Education, Development, and Practice. *Front Public Health* 2018;**6**:379. doi:10.3389/fpubh.2018.00379
- 13 Porter ME, Teisberg EO. Redefining competition in health care. *Harv Bus Rev* 2004;**82**:64–76, 136. <https://www.ncbi.nlm.nih.gov/pubmed/15202288>
- 14 Rathert C, Mittler JN, Lee YSH. Patient-provider therapeutic connections to improve health care: Conceptual development and systematic review of patient measures. *Health Care Manage Rev* Published Online First: 14 February 2022. doi:10.1097/HMR.0000000000000339
- 15 Zanotto BS, Etges APB da S, Marcolino MAZ, *et al.* Value-Based Healthcare Initiatives in Practice: A Systematic Review. *J Healthc Manag* 2021;**66**:340. doi:10.1097/JHM-D-20-00283
- 16 Gibbons C, Porter I, Gonçalves-Bradley DC, *et al.* Routine provision of feedback from patient-reported outcome measurements to healthcare providers and patients in clinical practice. *Cochrane Database Syst Rev* 2021;**10**:CD011589. doi:10.1002/14651858.CD011589.pub2
- 17 Jain N, Brock JL, Phillips FM, *et al.* Chronic preoperative opioid use is a risk factor for increased complications, resource use, and costs after cervical fusion. *Spine J* 2018;**18**:1989–98. doi:10.1016/j.spinee.2018.03.015
- 18 Rice-Townsend S, Barnes JN, Hall M, *et al.* Variation in practice and resource utilization associated with the diagnosis and management of appendicitis at freestanding children's hospitals: Implications for value-based comparative analysis. *Ann Surg* 2014;**259**:1228–34. doi:10.1097/SLA.0000000000000246
- 19 Fang, Shaker J, Drew JM, *et al.* The Cost of Hip and Knee Revision Arthroplasty by Diagnosis-Related Groups: Comparing Time-Driven Activity-Based Costing and Traditional Accounting. *J Arthroplasty* 2021;**36**:2674-2679.e2673. doi:10.1016/j.arth.2021.03.041
- 20 Fang, Shaker J, Hart P-A, *et al.* Variation in the profit margin for different types of total joint arthroplasty. *J Bone Joint Surg Am* 2021;**Publish Ahead of Print**. doi:10.2106/JBJS.21.00223
- 21 Wise, Blaschke BL, Parikh HR, *et al.* Variation of the Inpatient Cost of Care in the Treatment of Isolated Geriatric Intertrochanteric Hip Fractures. *Geriatr Orthop Surg Rehabil* 2020;**11**. doi:10.1177/2151459320976533
- 22 Keel G, Savage C, Rafiq M, *et al.* Time-driven activity-based costing in health care: A systematic review of the literature. *Health Policy* 2017;**121**:755–63. doi:10.1016/j.healthpol.2017.04.013
- 23 Hoenigl M, Lo M, Coyne CJ, *et al.* 4th Generation HIV screening in the emergency department: net profit or loss for hospitals? *AIDS Care* 2021;:1–5. doi:10.1080/09540121.2021.1995838

- 1
- 2
- 3
- 4 24 Zimmerman JL. *Accounting For Decision Making and Control Seventh Edition*. McGraw-Hill 2011. <http://digilib.umpalopo.ac.id:8080/jspui/handle/123456789/151>
- 5
- 6
- 7 25 Bramer WM, Milic J, Mast F. Reviewing retrieved references for inclusion in systematic reviews using endnote. *J Med Libr Assoc* 2017;**105**:84–7. doi:10.5195/jmla.2017.111
- 8
- 9
- 10 26 Pérez J, Díaz J, Garcia-Martin J, *et al*. Systematic literature reviews in software engineering—enhancement of the study selection process using Cohen’s Kappa statistic. *Journal of Systems and Software* 2020;**168**:110657. doi:10.1016/j.jss.2020.110657
- 11
- 12
- 13
- 14 27 Burnett RA Iii, Yang J, Courtney PM, *et al*. Costs of unicompartmental compared with total knee arthroplasty : a matched cohort study over ten years. *Bone Joint J* 2021;**103-B**:23–31. doi:10.1302/0301-620X.103B6.BJJ-2020-2259.R1
- 15
- 16
- 17
- 18 28 Sun LL, Cao DY, Yang JX, *et al*. Value-based medicine analysis on loop electrosurgical excision procedure and CO2 laser vaporization for the treatment of cervical intraepithelial neoplasia 2. *J Obstet Gynaecol Res* 2012;**38**:1064–70. doi:10.1111/j.1447-0756.2011.01832.x
- 19
- 20
- 21
- 22
- 23
- 24 29 Cronin KJ, Mair SD, Hawk GS, *et al*. Increased Health Care Costs and Opioid Use in Patients with Anxiety and Depression Undergoing Rotator Cuff Repair. *Arthroscopy - Journal of Arthroscopic and Related Surgery* 2020;**36**:2655–60. doi:10.1016/j.arthro.2020.05.038
- 25
- 26
- 27
- 28 30 Robles AJ, Kornblith LZ, Hendrickson CM, *et al*. Health care utilization and the cost of posttraumatic acute respiratory distress syndrome care. *J Trauma Acute Care Surg* 2018;**85**:148–54. doi:10.1097/TA.0000000000001926
- 29
- 30
- 31
- 32 31 Ahluwalia R, Cook J, Raheman F, *et al*. Improving the efficiency of ankle fracture care through home care and day-surgery units: Delivering safe surgery on a value-based healthcare model. *Surgeon* Published Online First: November 2020. doi:10.1016/j.surge.2020.08.004
- 33
- 34
- 35
- 36 32 McLaughlin N, Upadhyaya P, Buxey F, *et al*. Value-based neurosurgery: measuring and reducing the cost of microvascular decompression surgery. *J Neurosurg* 2014;**121**:700–8. doi:10.3171/2014.5.JNS131996
- 37
- 38
- 39
- 40 33 Wise KL, Parikh HR, Okelana B, *et al*. Measurement of value in rotator cuff repair: patient-level value analysis for the 1-year episode of care. *J Shoulder Elbow Surg* 2022;**31**:72–80. doi:10.1016/j.jse.2021.07.004
- 41
- 42
- 43
- 44 34 Alibrahim A, Abdulsalam Y, Al Mutawa S, *et al*. Towards value-based healthcare: Establishing baseline pharmacy care costs for diabetes management. *Int J Health Plann Manage* 2022;**37**:790–803. doi:10.1002/hpm.3370
- 45
- 46
- 47
- 48 35 Fang C, Hagar A, Gordon M, *et al*. Differences in Hospital Costs among Octogenarians and Nonagenarians Following Primary Total Joint Arthroplasty. *Geriatrics* 2021;**6**:26. doi:10.3390/geriatrics6010026
- 49
- 50
- 51
- 52 36 Fang C, Pagani N, Gordon M, *et al*. Episode-of-Care Costs for Revision Total Joint Arthroplasties by Decadal Age Groups. *Geriatrics* 2021;**6**:49. doi:10.3390/geriatrics6020049
- 53
- 54
- 55
- 56
- 57
- 58
- 59
- 60

- 1  
2  
3 37 Ganske IM, Sanchez K, Le E, *et al.* Time-Driven, Activity-Based Costing of Presurgical  
4 Infant Orthopedics: A Critical Component of Establishing Value of Latham Appliance and  
5 Nasoalveolar Molding. *Plastic & Reconstructive Surgery* 2021;**147**:444–54.  
6 doi:10.1097/PRS.00000000000007669  
7
- 8  
9 38 McClintock TR, Friedlander DF, Feng AY, *et al.* Determining Variable Costs in the Acute  
10 Urolithiasis Cycle of Care Through Time-Driven Activity-Based Costing. *Urology*  
11 2021;**157**:107–13. doi:10.1016/j.urology.2021.05.102  
12
- 13 39 Sethi RK, Pumpian RP, Drolet CE, *et al.* Utilizing Lean Methodology and Time-Driven  
14 Activity-Based Costing Together: An Observational Pilot Study of Hip Replacement Surgery  
15 Utilizing a New Method to Study Value-Based Health Care. *J Bone Joint Surg Am* Published  
16 Online First: 14 October 2021. doi:10.2106/JBJS.21.00129  
17
- 18 40 Thaker NG, Boyce-Fappiano D, Ning, *et al.* Activity-Based Costing of Intensity-Modulated  
19 Proton versus Photon Therapy for Oropharyngeal Cancer. *International Journal of Particle*  
20 *Therapy* 2021;**8**:374–82. doi:10.14338/IJPT-20-00042.1  
21  
22
- 23 41 Kukreja JB, Seif MA, Mery MW, *et al.* Utilizing time-driven activity-based costing to  
24 determine open radical cystectomy and ileal conduit surgical episode cost drivers. *Urologic*  
25 *Oncology: Seminars and Original Investigations* 2021;**39**:237.e1-237.e5.  
26 doi:10.1016/j.urolonc.2020.11.030  
27
- 28 42 Mattar D, Di Filippo A, Invento A, *et al.* Economic implications of ACOSOG Z0011 trial  
29 application into clinical practice at the European Institute of Oncology. *Eur J Surg Oncol*  
30 2021;**47**:2499–505. doi:10.1016/j.ejso.2021.06.016  
31  
32
- 33 43 Bueno H, Bernal JL, Jimenez-Jimenez V, *et al.* The Clinical outcomes, healthcare resource  
34 utilization, and related costs (COHERENT) model. Application in heart failure patients. *Rev*  
35 *Esp Cardiol* Published Online First: 20 October 2021. doi:10.1016/j.rec.2021.08.009  
36
- 37 44 Casey M, Perera D, Enticott J, *et al.* High utilisers of emergency departments: the profile and  
38 journey of patients with mental health issues. *Int J Psychiatry Clin Pract* 2021;**25**:316–24.  
39 doi:10.1080/13651501.2021.1904998  
40
- 41 45 Cohen RV, Nishikawa AM, Ribeiro RA, *et al.* Surgical Management of Obesity in Brazil:  
42 Proposal for a Value-Based Healthcare Model and Preliminary Results. *Value in Health*  
43 *Regional Issues* 2021;**26**:10–4. doi:10.1016/j.vhri.2020.11.005  
44  
45
- 46 46 Negrini R, da Silva Ferreira RD, Guimaraes DZ. Value-based care in obstetrics: comparison  
47 between vaginal birth and caesarean section. *BMC Pregnancy Childbirth* 2021;**21**:333.  
48 doi:10.1186/s12884-021-03798-2  
49
- 50 47 Fernando-Canavan L, Gust A, Hsueh A, *et al.* Measuring the economic impact of hospital-  
51 acquired complications on an acute health service. *Aust Health Rev* 2021;**45**:135–42.  
52 doi:10.1071/AH20126  
53  
54  
55  
56  
57  
58  
59  
60

- 1  
2  
3 48 Khanijow AN, Wood LN, Xie R, *et al.* The impact of an enhanced recovery program (ERP)  
4 on the costs of colorectal surgery. *Am J Surg* 2021;**222**:186–92.  
5 doi:10.1016/j.amjsurg.2020.11.034  
6  
7  
8 49 Vanni F, Foglia E, Pennestrì F, *et al.* Introducing enhanced recovery after surgery in a high-  
9 volume orthopaedic hospital: a health technology assessment. *BMC Health Serv Res*  
10 2020;**20**:773. doi:10.1186/s12913-020-05634-3  
11  
12 50 Jacobs K, Dewilde T, Vandoren C, *et al.* Variability in hospital costs of Adult Spinal  
13 Deformity care. *Spine* 2020;**45**:1221–8. doi:10.1097/BRS.0000000000003497  
14  
15 51 Ning MS, Venkatesan AM, Stafford RJ, *et al.* Developing an intraoperative 3T MRI-guided  
16 brachytherapy program within a diagnostic imaging suite: Methods, process workflow, and  
17 value-based analysis. *Brachytherapy* 2020;**19**:427–37. doi:10.1016/j.brachy.2019.09.010  
18  
19 52 Caloway C, Yamasaki A, Callans KM, *et al.* Quantifying the benefits from a care coordination  
20 program for tracheostomy placement in neonates. *Int J Pediatr Otorhinolaryngol* 2020;**134**.  
21 doi:10.1016/j.ijporl.2020.110025  
22  
23 53 Burnhope E, Waring M, Guilder A, *et al.* A systematic approach towards implementing value-  
24 based health care in heart failure: Understandings from retrospective analysis methods in  
25 South London. *Health Serv Manage Res* Published Online First: 2020.  
26 doi:10.1177/0951484820971442  
27  
28 54 Lenfant L, Sawczyn G, Kim S, *et al.* Single-institution Cost Comparison: Single-port Versus  
29 Multiport Robotic Prostatectomy. *European Urology Focus* Published Online First: 2020.  
30 doi:10.1016/j.euf.2020.06.010  
31  
32 55 Hernandez A, Kaplan RS, Witkowski ML, *et al.* Navy Medicine Introduces Value-Based  
33 Health Care. *Health Aff* 2019;**38**:1393–400. doi:10.1377/hlthaff.2019.00280  
34  
35 56 Basto J, Chahal R, Riedel B. Time-driven activity-based costing to model the utility of parallel  
36 induction redesign in high-turnover operating lists. *Healthc Pap* 2019;**7**.  
37 doi:10.1016/j.hjdsi.2019.01.003  
38  
39 57 McCreary DL, Dugarte AJ, Vang S, *et al.* Patient-Level Value Analysis: An Innovative  
40 Approach to Optimize Care Delivery. *J Orthop Trauma* 2019;**33**:S49–52.  
41 doi:10.1097/BOT.0000000000001624  
42  
43 58 Ahluwalia R, Vainieri E, Tam J, *et al.* Surgical Diabetic Foot Debridement: Improving  
44 Training and Practice Utilizing the Traffic Light Principle. *Int J Low Extrem Wounds*  
45 2019;**18**:279–86. doi:10.1177/1534734619853657  
46  
47 59 Kurt P, Saban M, Cankaya F, *et al.* Time-Driven Activity-Based Costing in the  
48 Ophthalmology Department of State Hospital: a Case Study. *Fresenius Environ Bull*  
49 2019;**28**:2754–70.  
50  
51  
52  
53  
54  
55  
56  
57  
58  
59  
60

- 1  
2  
3 60 Danilyants N, MacKoul P, van der Does L, *et al.* A value-based evaluation of minimally  
4 invasive hysterectomy approaches. *Gynecol Surg* 2019;**16**:5. doi:10.1186/s10397-019-1057-  
5 9  
6  
7  
8 61 Danilyants N, MacKoul P, Baxi R, *et al.* Value-based assessment of hysterectomy approaches.  
9 *J Obstet Gynaecol Res* 2019;**45**:389–98. doi:10.1111/jog.13853  
10  
11 62 Chatfield SC, Volpicelli FM, Adler NM, *et al.* Bending the cost curve: Time series analysis  
12 of a value transformation programme at an academic medical centre. *BMJ Qual Saf*  
13 2019;**28**:449–58. doi:10.1136/bmjqs-2018-009068  
14  
15 63 Featherall J, Brigati DP, Arney AN, *et al.* Effects of a Total Knee Arthroplasty Care Pathway  
16 on Cost, Quality, and Patient Experience: Toward Measuring the Triple Aim. *J Arthroplasty*  
17 2019;**34**:2561–8. doi:10.1016/j.arth.2019.06.011  
18  
19 64 Robinson JR, Carter NH, Gibson C, *et al.* Improving the value of care for appendectomy  
20 through an individual surgeon-specific approach. *J Pediatr Surg* 2018;**53**:1181–  
21 6. <https://www.ncbi.nlm.nih.gov/pmc/articles/PMC5994354/pdf/nihms949182.pdf>  
22  
23 65 Karns MR, Jones DL, Todd DC, *et al.* Patient- and Procedure-Specific Variables Driving  
24 Total Direct Costs of Outpatient Anterior Cruciate Ligament Reconstruction. *Orthop J Sports*  
25 *Med* 2018;**6**:2325967118788543. doi:10.1177/2325967118788543  
26  
27 66 Yu YR, Abbas PI, Smith CM, *et al.* Time-driven activity-based costing: A dynamic value  
28 assessment model in pediatric appendicitis. *J Pediatr Surg* 2017;**52**:1045–9.  
29 doi:10.1016/j.jpedsurg.2017.03.032  
30  
31 67 Parra E, Arenas MD, Alonso M, *et al.* Assessing value-based health care delivery for  
32 haemodialysis. *J Eval Clin Pract* 2017;**23**:477–85. doi:10.1111/jep.12483  
33  
34 68 Kaplan AL, Agarwal N, Setlur NP, *et al.* Measuring the cost of care in benign prostatic  
35 hyperplasia using time-driven activity-based costing (TDABC). *Healthcare*. 2015;**3**:43–8.  
36 doi:10.1016/j.hjdsi.2014.09.007  
37  
38 69 McLaughlin N, Martin NA, Upadhyaya P, *et al.* Assessing the cost of contemporary pituitary  
39 care. *Neurosurg Focus* 2014;**37**:E7. doi:10.3171/2014.8.FOCUS14445  
40  
41 70 Abbott MM, Meara JG. A microcosting approach for isolated, unilateral cleft lip care in the  
42 first year of life. *Plast Reconstr Surg* 2011;**127**:333–9. doi:10.1097/PRS.0b013e3181f95af3  
43  
44 71 Steinmann G, Delnoij D, van de Bovenkamp H, *et al.* Expert consensus on moving towards a  
45 value-based healthcare system in the Netherlands: a Delphi study. *BMJ Open*  
46 2021;**11**:e043367. doi:10.1136/bmjopen-2020-043367  
47  
48 72 Hoozée S, Bruggeman W. Identifying operational improvements during the design process of  
49 a time-driven ABC system: The role of collective worker participation and leadership style.  
50 *Manag Acc Res* 2010;**21**:185–98. doi:10.1016/j.mar.2010.01.003  
51  
52  
53  
54  
55  
56  
57  
58  
59  
60

Page 33 of 72  
1  
2  
3  
4  
5  
6  
7  
8  
9  
10  
11  
12  
13  
14  
15  
16  
17  
18  
19  
20  
21  
22  
23  
24  
25  
26  
27  
28  
29

Unique studies identified through database search (n=3,874)  
Embase, 1,254  
Medline, 1,160  
EBSCOhost, 482  
Web of Science, 978

Studies screened after removal of duplicates (n=1,930)  
Cohen's kappa 0.77 substantial agreement

Studies excluded based on title and/or abstract  
(n=1,256)

Full text studies assessed for eligibility (n=674)  
Cohen's kappa 0.78 substantial agreement

Studies excluded during a full paper review (n=459)  
Outside time frame, 11  
Language, 1  
Paper unavailable, 26  
Not peer reviewed original research, 64  
Review, 105  
Not about VBHC, 3  
No costs measured or estimated, 249

Studies included in qualitative synthesis for research  
question 1 (n=215)

Studies included in qualitative synthesis for research  
question 2 (n=49)

## SUPPLEMENT DIGITAL CONTENT

### 1 Search strategy

2003-1/1/2022

#### embase.com

(((value-based OR valuebased) NOT ((value-based OR valuebased) NEXT/2 (insuran\* OR purchas\* OR pric\* OR reimburse\* OR contract\* OR payment\* OR partnership\*)) OR vbhc OR vb-hc):ab,ti) AND ('cost'/de OR 'health care cost'/de OR 'time driven activity based costing'/de OR 'activity based costing'/de OR (cost OR costs OR costing OR microcosting OR macrocosting OR tdabc OR abc OR (resource NEAR/3 assignment\*) OR (direct\* NEAR/3 estimat\*)):ab,ti) NOT (cost NEXT/1 (eval\* OR benefit\* OR effectiv\* OR utilit\* OR consequen\* OR minimi\* OR outcome\* OR reduc\* OR saving\*)):ti NOT [conference abstract]/lim AND ([dutch]/lim OR [English]/lim)

#### Medline Ovid

(((value-based OR valuebased) NOT ((value-based OR valuebased) ADJ2 (insuran\* OR purchas\* OR pric\* OR reimburse\* OR contract\* OR payment\* OR partnership\*)) OR vbhc OR vb-hc).ab,ti.) AND ("Costs and Cost Analysis"/ OR Health Care Costs/ OR (cost OR costs OR costing OR microcosting OR macrocosting OR tdabc OR abc OR (resource ADJ3 assignment\*) OR (direct\* ADJ3 estimat\*)):ab,ti.) NOT (cost ADJ (eval\* OR benefit\* OR effectiv\* OR utilit\* OR consequen\* OR minimi\* OR outcome\* OR reduc\* OR saving\*)):ti. AND (dutch.la. OR english.la.)

#### CINAHL EBSCOhost

(((TI(value-based OR valuebased) OR AB (value-based OR valuebased)) NOT (TI((value-based OR valuebased) N2 (insuran\* OR purchas\* OR pric\* OR reimburse\* OR contract\* OR payment\* OR partnership\*)) OR AB((value-based OR valuebased) N2 (insuran\* OR purchas\* OR pric\* OR reimburse\* OR contract\* OR payment\* OR partnership\*))) OR TI(vbhc OR vb-hc) OR AB(vbhc OR vb-hc))) AND ((MH "Costs and Cost Analysis" OR MH Health Care Costs OR MH Value-Based Health Care OR AB(costing OR microcosting OR macrocosting OR tdabc OR abc OR (resource N2 assignment\*) OR (direct\* N2 estimat\*))) OR (TI(cost OR costs) NOT TI(cost N1 (eval\* OR benefit\* OR effectiv\* OR utilit\* OR consequen\* OR minimi\* OR outcome\* OR reduc\* OR saving\*)))) AND LA(dutch OR english)

#### Web of science

TS=(((value-based OR valuebased) NOT ((value-based OR valuebased) NEAR/2 (insuran\* OR purchas\* OR pric\* OR reimburse\* OR contract\* OR payment\* OR partnership\*)) OR vbhc OR vb-hc)) AND ((cost OR costs OR costing OR microcosting OR macrocosting OR tdabc OR abc OR (resource NEAR/2 assignment\*) OR (direct\* NEAR/2 estimat\*))) AND (care OR health\* OR medicine OR clinical OR hospital\* OR surger\* OR therap\* OR patient\* OR oncolog\* OR drugs OR medication\* OR cancer\* OR pharmac\*) NOT TI=(cost NEAR/1 (eval\* OR benefit\* OR effectiv\* OR utilit\* OR consequen\* OR minimi\* OR outcome\* OR reduc\* OR saving\*)) AND DT=(article) AND LA=(dutch OR english)

1  
2  
3 **SUPPLEMENT DIGITAL CONTENT**

4 **2 Inclusion/exclusion criteria, data extracted**

5 ***Eligibility criteria***

|                      |                                                                                                                    |
|----------------------|--------------------------------------------------------------------------------------------------------------------|
| 6 Language           | English or Dutch                                                                                                   |
| 7 Publication date   | Between 2003 and 1.1.2022                                                                                          |
| 8 Research type      | Original, peer-reviewed, empirical research                                                                        |
| 9 Terms              | Any variation of the terms “cost” and “value-based” in title or abstract                                           |
| 10 Full text content | Costs of an intervention, treatment, care path, or other healthcare activity must have been measured or estimated. |

11 ***Variables collected***

|                           |                                                                                                                                                                                                                                                                                                                                                                                                                                                                                                                                                             |
|---------------------------|-------------------------------------------------------------------------------------------------------------------------------------------------------------------------------------------------------------------------------------------------------------------------------------------------------------------------------------------------------------------------------------------------------------------------------------------------------------------------------------------------------------------------------------------------------------|
| 12 Descriptive            | Name, year published, authors, medical specialty, location                                                                                                                                                                                                                                                                                                                                                                                                                                                                                                  |
| 13 Costs included         | Based on author reporting we classify studies into one of two categories: <ul style="list-style-type: none"> <li>• Direct costs only</li> <li>• Direct and indirect costs</li> </ul>                                                                                                                                                                                                                                                                                                                                                                        |
| 14 Cost perspective       | We inductively classify studies into one or more categories: <ul style="list-style-type: none"> <li>• Provider costs (e.g. hospital)</li> <li>• Payer costs (reimbursements, charges, payments)</li> <li>• Patient costs (out-of-pocket costs to patient)</li> </ul>                                                                                                                                                                                                                                                                                        |
| 15 Care path length       | We inductively classify studies into one of the following categories: <ul style="list-style-type: none"> <li>• Full care path</li> <li>• Full care path, full surgical episode (FSE)</li> <li>• Partial care path, full surgical episode (PSE)</li> <li>• Partial care path</li> </ul>                                                                                                                                                                                                                                                                      |
| 16 Costing method label   | Costing method used, as labelled by the authors. These include traditional cost accounting, ABC, or ABC excluding overheads, TDABC, or TDABC with some cost categories omitted, microcosting, bottom-up clinical costing, reference pricing, relative value units or DRG costs, direct variable costs, or direct costs as an estimate of total cost, reimbursements, charges, claims, payments, and cost-to-charge ratio.                                                                                                                                   |
| 17 Costing method applied | Costing method applied, based on method described by authors. We classified studies using management accounting literature (e.g., Zimmerman, 2015). We found the following categories represented in the literature. <ul style="list-style-type: none"> <li>• Direct costing</li> <li>• Absorption costing, which includes: <ul style="list-style-type: none"> <li>○ ABC</li> <li>○ TDABC.</li> <li>○ Other</li> </ul> </li> </ul> <p>Cases using reimbursements or charges to estimate costs were coded as ‘reimbursements’ or ‘cost-to-charge ratio’.</p> |
| 18 Facilitating factors   | If the study discussed the consequences of the costing information generated, we collected the consequences. After we collected all consequences, we categorized these inductively.                                                                                                                                                                                                                                                                                                                                                                         |

19 *Note:* ABC: Activity-based costing; TDABC: Time-driven activity-based costing

20 **Supplement digital content table 1.** Eligibility criteria and data collected.



## SUPPLEMENT DIGITAL CONTENT

### 3 All studies included in RQ1

| Perspective     | Method                                     | n  | studies               |
|-----------------|--------------------------------------------|----|-----------------------|
| <i>Provider</i> | Direct costs only                          |    |                       |
|                 | Direct costing                             | 23 | [1–23]                |
|                 | Absorption costing                         |    |                       |
|                 | ABC                                        | 7  | [24–30]               |
|                 | TDABC                                      | 31 | [31–61]               |
|                 | Other                                      | 47 | [62–108]              |
|                 | Not specified                              | 3  | [109–111]             |
| <i>Insurer</i>  | Charges & reimbursements                   |    |                       |
|                 | Charges, reimbursements, claims            | 81 | [23,39,112–190]       |
|                 | Charges adjusted with cost-to charge ratio | 25 | [108,191–214]         |
| <i>Patient</i>  | Out-of-pocket costs to patient             | 5  | [106,126,130,215,216] |

*Note:* Total number of studies here is 222; seven studies measure two cost types[23,38,39,106,108,126,130]. Studies are classified based on actual costs included and methods described, not necessarily the labels used by authors.

**Supplement digital content table 2.** Overview of cost measurement methods used in value-based healthcare with references

#### References of all studies included in research question 1

*Reference numbers start at 1, these differ from the manuscript.*

- 1 Chatfield SC, Volpicelli FM, Adler NM, *et al.* Bending the cost curve: Time series analysis of a value transformation programme at an academic medical centre. *BMJ Qual Saf* 2019;**28**:449–58.
- 2 Featherall J, Brigati DP, Arney AN, *et al.* Effects of a Total Knee Arthroplasty Care Pathway on Cost, Quality, and Patient Experience: Toward Measuring the Triple Aim. *J Arthroplasty* 2019;**34**:2561–8.
- 3 Karns MR, Jones DL, Todd DC, *et al.* Patient- and Procedure-Specific Variables Driving Total Direct Costs of Outpatient Anterior Cruciate Ligament Reconstruction. *Orthop J Sports Med* 2018;**6**:2325967118788543.
- 4 Tan RYC, Met-Domestici M, Zhou K, *et al.* Using quality improvement methods and time-driven activity-based costing to improve value-based cancer care delivery at a Cancer Genetics clinic. *J Oncol Pract* 2016;**12**:e320–31.
- 5 Ravikumar TS, Sharma C, Marini C, *et al.* A validated value-based model to improve hospital-wide perioperative outcomes: Adaptability to combined medical/surgical inpatient cohorts. *Ann Surg* 2010;**252**:486–96.

- 6 Fortmann AL, Walker C, Barger K, *et al.* Care Team Integration in Primary Care Improves One-Year Clinical and Financial Outcomes in Diabetes: A Case for Value-Based Care. *Popul Health Manag* 2020;**23**:467–75.
- 7 Ryan SP, Plate JF, Black CS, *et al.* Value-Based Care Has Not Resulted in Biased Patient Selection: Analysis of a Single Center’s Experience in the Care for Joint Replacement Bundle. *J Arthroplasty* 2019;**34**:1872–5.
- 8 Plate JF, Ryan SP, Black CS, *et al.* No Changes in Patient Selection and Value-Based Metrics for Total Hip Arthroplasty After Comprehensive Care for Joint Replacement Bundle Implementation at a Single Center. *J Arthroplasty* 2019;**34**:1581–4.
- 9 Jakovljevic M, Zugic A, Rankovic A, *et al.* Radiation therapy remains the key cost driver of oncology inpatient treatment. *J Med Econ* 2015;**18**:29–36.
- 10 Siu A, Patel J, Prentice HA, *et al.* A Cost Analysis of Regional Versus General Anesthesia for Carotid Endarterectomy. *Ann Vasc Surg* 2017;**39**:189–94.
- 11 Monroe GR, Frederix GW, Savelberg SMC, *et al.* Effectiveness of whole-exome sequencing and costs of the traditional diagnostic trajectory in children with intellectual disability. *Genet Med* 2016;**18**:949–56.
- 12 Lott A, Haglin J, Saleh H, *et al.* Using a Validated Middle-Age and Geriatric Risk Tool to Identify Early (<48 Hours) Hospital Mortality and Associated Cost of Care. *J Orthop Trauma* 2018;**32**:349–53.
- 13 Reilly CA, Doughty HP, Werth PM, *et al.* Creating a Value Dashboard for Orthopaedic Surgical Procedures. *J Bone Joint Surg Am* 2020;**102**:1849–56.
- 14 Konda SR, Lott A, Egol KA. The Coming Hip and Femur Fracture Bundle: A New Inpatient Risk Stratification Tool for Care Providers. *Geriatr Orthop Surg Rehabil* 2018;**9**:215145931879531.
- 15 Cremins M, Vellanky S, McCann G, *et al.* Considering healthcare value and associated risk factors with postoperative urinary retention after elective laminectomy. *Spine J* 2020;**20**:701–7.
- 16 Edholm K, Lappé K, Kukhareva P, *et al.* Reducing Diabetic Ketoacidosis Intensive Care Unit Admissions Through an Electronic Health Record-Driven, Standardized Care Pathway. *J Healthc Qual* 2020;**42**:e66–74.
- 17 Keating CL, Dixon JB, Moodie ML, *et al.* Cost-Efficacy of Surgically Induced Weight Loss for the Management of Type 2 Diabetes A randomized controlled trial. *Diabetes Care* 2009;**32**:580–4.
- 18 Feizpour CA, Patel, Syed MA, *et al.* Enhanced recovery in liver transplantation: A value-based approach to complex surgical care. *Surgery* 2021;**170**:1830–7.

- 19 Gillis HC, Dolan K, Sargel CL, *et al.* A quality improvement approach to influence value-based mucolytic use in the PICU. *Pediatr Qual Saf* 2021;**6**:e438.
- 20 Konda SR, Johnson JR, Dedhia N, *et al.* Can We Stratify Quality and Cost for Older Patients With Proximal and Midshaft Humerus Fractures? *Geriatr Orthop Surg Rehabil* 2021;**12**:2151459321992742.
- 21 Panda N, Shagabayeva L, Comrie CE, *et al.* Drivers of Cost Associated With Minimally Invasive Esophagectomy. *Ann Thorac Surg* 2022;**113**:264–70.
- 22 Wang W, Li E, Campbell K, *et al.* Economic analysis on adoption of biosimilar granulocyte colony-stimulating factors in patients with nonmyeloid cancer at risk of febrile neutropenia within the Oncology Care Model framework. *JCO Oncol Pract* 2021;**17**:e1139–49.
- 23 Gray CF, Prieto HA, Deen JT, *et al.* Bundled Payment Creep: Institutional Redesign for Primary Arthroplasty Positively Affects Revision Arthroplasty. *J Arthroplasty* 2019;**34**:206–10.
- 24 Wise, Blaschke BL, Parikh HR, *et al.* Variation of the Inpatient Cost of Care in the Treatment of Isolated Geriatric Intertrochanteric Hip Fractures. *Geriatr Orthop Surg Rehabil* 2020;**11**. doi:10.1177/2151459320976533
- 25 McLaughlin N, Upadhyaya P, Buxey F, *et al.* Value-based neurosurgery: measuring and reducing the cost of microvascular decompression surgery. *J Neurosurg* 2014;**121**:700–8.
- 26 Abbott MM, Meara JG. A microcosting approach for isolated, unilateral cleft lip care in the first year of life. *Plast Reconstr Surg* 2011;**127**:333–9.
- 27 McLaughlin N, Martin NA, Upadhyaya P, *et al.* Assessing the cost of contemporary pituitary care. *Neurosurg Focus* 2014;**37**:E7.
- 28 Vanni F, Foglia E, Pennestrì F, *et al.* Introducing enhanced recovery after surgery in a high-volume orthopaedic hospital: a health technology assessment. *BMC Health Serv Res* 2020;**20**:773.
- 29 Jacobs K, Dewilde T, Vandoren C, *et al.* Variability in hospital costs of Adult Spinal Deformity care. *Spine* 2020;**45**:1221–8.
- 30 Kaul S, Korgenski EK, Ying J, *et al.* A retrospective analysis of treatment-related hospitalization costs of pediatric, adolescent, and young adult acute lymphoblastic leukemia. *Cancer Med* 2016;**5**:221–9.
- 31 Etges, Cruz LN, Schlatter R, *et al.* Time-driven activity-based costing as a strategy to increase efficiency: An analyses of interventional coronary procedures. *Int J Health Plann Manage* Published Online First: 9 September 2021. doi:10.1002/hpm.3320
- 32 Martin JA, Mayhew CR, Morris AJ, *et al.* Using Time-Driven Activity-Based Costing as a Key Component of the Value Platform: A Pilot Analysis of Colonoscopy, Aortic Valve Replacement and Carpal Tunnel Release Procedures. *J Clin Med Res* 2018;**10**:314–20.

- 1  
2  
3 33 Bodar YJL, Srinivasan AK, Shah AS, *et al.* Time-Driven activity-based costing identifies opportunities for process efficiency and cost optimization for robot-assisted laparoscopic pyeloplasty. *J Pediatr Urol* 2020;**16**:460.e1-460.e10.
- 4  
5  
6  
7  
8 34 French KE, Guzman AB, Rubio AC, *et al.* Value based care and bundled payments: Anesthesia care costs for outpatient oncology surgery using time-driven activity-based costing. *Healthc (Amst)* 2016;**4**:173–80.
- 9  
10  
11  
12 35 Isaacson D, Ahmad T, Metzler I, *et al.* Defining the Costs of Reusable Flexible Ureteroscope Reprocessing Using Time-Driven Activity-Based Costing. *J Endourol* 2017;**31**:1026–31.
- 13  
14  
15  
16 36 Ilg AM, Laviana AA, Kamrava M, *et al.* Time-driven activity-based costing of low-dose-rate and high-dose-rate brachytherapy for low-risk prostate cancer. *Brachytherapy* 2016;**15**:760–7.
- 17  
18  
19  
20 37 Dziemianowicz M, Burmeister J, Dominello M. Examining the Financial Impact of Altered Fractionation in Breast Cancer: An Analysis Using Time-Driven Activity-Based Costing. *Pract Radiat Oncol* 2021;**11**:245–51.
- 21  
22  
23  
24 38 Fang, Shaker J, Drew JM, *et al.* The Cost of Hip and Knee Revision Arthroplasty by Diagnosis-Related Groups: Comparing Time-Driven Activity-Based Costing and Traditional Accounting. *J Arthroplasty* 2021;**36**:2674-2679.e2673.
- 25  
26  
27  
28 39 Fang, Shaker J, Hart P-A, *et al.* Variation in the profit margin for different types of total joint arthroplasty. *J Bone Joint Surg Am* 2021;**Publish Ahead of Print**. doi:10.2106/JBJS.21.00223
- 29  
30  
31  
32 40 Ahluwalia R, Cook J, Raheman F, *et al.* Improving the efficiency of ankle fracture care through home care and day-surgery units: Delivering safe surgery on a value-based healthcare model. *Surgeon* Published Online First: November 2020. doi:10.1016/j.surge.2020.08.004
- 33  
34  
35  
36 41 Wise KL, Parikh HR, Okelana B, *et al.* Measurement of value in rotator cuff repair: patient-level value analysis for the 1-year episode of care. *J Shoulder Elbow Surg* 2022;**31**:72–80.
- 37  
38  
39  
40 42 Hernandez A, Kaplan RS, Witkowski ML, *et al.* Navy Medicine Introduces Value-Based Health Care. *Health Aff* 2019;**38**:1393–400.
- 41  
42  
43  
44 43 Ning MS, Venkatesan AM, Stafford RJ, *et al.* Developing an intraoperative 3T MRI-guided brachytherapy program within a diagnostic imaging suite: Methods, process workflow, and value-based analysis. *Brachytherapy* 2020;**19**:427–37.
- 45  
46  
47  
48 44 Yu YR, Abbas PI, Smith CM, *et al.* Time-driven activity-based costing: A dynamic value assessment model in pediatric appendicitis. *J Pediatr Surg* 2017;**52**:1045–9.
- 49  
50  
51  
52 45 Basto J, Chahal R, Riedel B. Time-driven activity-based costing to model the utility of parallel induction redesign in high-turnover operating lists. *Healthc Pap* 2019;**7**. doi:10.1016/j.hjdsi.2019.01.003
- 53  
54  
55  
56  
57  
58  
59  
60

- 1  
2  
3 46 McCreary DL, Dugarte AJ, Vang S, *et al.* Patient-Level Value Analysis: An Innovative  
4 Approach to Optimize Care Delivery. *J Orthop Trauma* 2019;**33**:S49–52.  
5  
6  
7 47 Caloway C, Yamasaki A, Callans KM, *et al.* Quantifying the benefits from a care  
8 coordination program for tracheostomy placement in neonates. *Int J Pediatr*  
9 *Otorhinolaryngol* 2020;**134**. doi:10.1016/j.ijporl.2020.110025  
10  
11 48 Ahluwalia R, Vainieri E, Tam J, *et al.* Surgical Diabetic Foot Debridement: Improving  
12 Training and Practice Utilizing the Traffic Light Principle. *Int J Low Extrem Wounds*  
13 2019;**18**:279–86.  
14  
15 49 Kaplan AL, Agarwal N, Setlur NP, *et al.* Measuring the cost of care in benign prostatic  
16 hyperplasia using time-driven activity-based costing (TDABC). *Healthcare*. 2015;**3**:43–8.  
17 doi:10.1016/j.hjdsi.2014.09.007  
18  
19 50 Kurt P, Saban M, Cankaya F, *et al.* Time-Driven Activity-Based Costing in the  
20 Ophthalmology Department of State Hospital: a Case Study. *Fresenius Environ Bull*  
21 2019;**28**:2754–70.  
22  
23 51 Alibrahim A, Abdulsalam Y, Al Mutawa S, *et al.* Towards value-based healthcare:  
24 Establishing baseline pharmacy care costs for diabetes management. *Int J Health Plann*  
25 *Manage* 2022;**37**:790–803.  
26  
27 52 Fang C, Hagar A, Gordon M, *et al.* Differences in Hospital Costs among Octogenarians and  
28 Nonagenarians Following Primary Total Joint Arthroplasty. *Geriatrics* 2021;**6**:26.  
29  
30 53 Fang C, Pagani N, Gordon M, *et al.* Episode-of-Care Costs for Revision Total Joint  
31 Arthroplasties by Decadal Age Groups. *Geriatrics* 2021;**6**:49.  
32  
33 54 Ganske IM, Sanchez K, Le E, *et al.* Time-Driven, Activity-Based Costing of Presurgical  
34 Infant Orthopedics: A Critical Component of Establishing Value of Latham Appliance and  
35 Nasoalveolar Molding. *Plastic & Reconstructive Surgery* 2021;**147**:444–54.  
36  
37 55 McClintock TR, Friedlander DF, Feng AY, *et al.* Determining Variable Costs in the Acute  
38 Urolithiasis Cycle of Care Through Time-Driven Activity-Based Costing. *Urology*  
39 2021;**157**:107–13.  
40  
41 56 Sethi RK, Pumpian RP, Drolet CE, *et al.* Utilizing Lean Methodology and Time-Driven  
42 Activity-Based Costing Together: An Observational Pilot Study of Hip Replacement  
43 Surgery Utilizing a New Method to Study Value-Based Health Care. *J Bone Joint Surg Am*  
44 Published Online First: 14 October 2021. doi:10.2106/JBJS.21.00129  
45  
46 57 Thaker NG, Boyce-Fappiano D, Ning, *et al.* Activity-Based Costing of Intensity-Modulated  
47 Proton versus Photon Therapy for Oropharyngeal Cancer. *International Journal of Particle*  
48 *Therapy* 2021;**8**:374–82.  
49  
50 58 Kukreja JB, Seif MA, Mery MW, *et al.* Utilizing time-driven activity-based costing to  
51 determine open radical cystectomy and ileal conduit surgical episode cost drivers. *Urologic*  
52 *Oncology: Seminars and Original Investigations* 2021;**39**:237.e1-237.e5.  
53  
54  
55  
56  
57  
58  
59  
60

- 1  
2  
3 59 Mattar D, Di Filippo A, Invento A, *et al.* Economic implications of ACOSOG Z0011 trial  
4 application into clinical practice at the European Institute of Oncology. *Eur J Surg Oncol*  
5 2021;**47**:2499–505.  
6  
7 60 McLaughlin N, Burke MA, Setlur NP, *et al.* Time-driven activity-based costing: a driver for  
8 provider engagement in costing activities and redesign initiatives. *Neurosurg Focus*  
9 2014;**37**:E3.  
10  
11 61 Jacir A, Mendoza D, Dean E. The cost of care during times of COVID: Case study of  
12 TDABC and minimum utilization cost analysis in a medicare advantage population. *Journal*  
13 *of Health Care*  
14 2021;**48**.<http://www.healthfinancejournal.com/index.php/johcf/article/view/264>  
15  
16 62 Danilyants N, MacKoul P, van der Does L, *et al.* A value-based evaluation of minimally  
17 invasive hysterectomy approaches. *Gynecol Surg* 2019;**16**:5.  
18  
19 63 Parra E, Arenas MD, Alonso M, *et al.* Assessing value-based health care delivery for  
20 haemodialysis. *J Eval Clin Pract* 2017;**23**:477–85.  
21  
22 64 Danilyants N, MacKoul P, Baxi R, *et al.* Value-based assessment of hysterectomy  
23 approaches. *J Obstet Gynaecol Res* 2019;**45**:389–98.  
24  
25 65 Lenfant L, Sawczyn G, Kim S, *et al.* Single-institution Cost Comparison: Single-port Versus  
26 Multiport Robotic Prostatectomy. *European Urology Focus* Published Online First: 2020.  
27 doi:10.1016/j.euf.2020.06.010  
28  
29 66 Robinson JR, Carter NH, Gibson C, *et al.* Improving the value of care for appendectomy  
30 through an individual surgeon-specific approach. *J Pediatr Surg* 2018;**53**:1181–6.  
31  
32 67 Bueno H, Bernal JL, Jimenez-Jimenez V, *et al.* The Clinical outcomes, healthcare resource  
33 utilization, and related costs (COHERENT) model. Application in heart failure patients. *Rev*  
34 *Esp Cardiol* Published Online First: 20 October 2021. doi:10.1016/j.rec.2021.08.009  
35  
36 68 Casey M, Perera D, Enticott J, *et al.* High utilisers of emergency departments: the profile  
37 and journey of patients with mental health issues. *Int J Psychiatry Clin Pract* 2021;**25**:316–  
38 24.  
39  
40 69 Cohen RV, Nishikawa AM, Ribeiro RA, *et al.* Surgical Management of Obesity in Brazil:  
41 Proposal for a Value-Based Healthcare Model and Preliminary Results. *Value in Health*  
42 *Regional Issues* 2021;**26**:10–4.  
43  
44 70 Hennink SD, Hofland N, Gopie JP, *et al.* Value-based healthcare in Lynch syndrome. *Fam*  
45 *Cancer* 2013;**12**:347–54.  
46  
47 71 Medbery RL, Chadid TS, Sweeney JF, *et al.* Laparoscopic vs open right hepatectomy: A  
48 value-based analysis. *J Am Coll Surg* 2014;**218**:929–39.  
49  
50 72 Gabriel L, Casey J, Gee M, *et al.* Value-based healthcare analysis of joint replacement  
51 surgery for patients with primary hip osteoarthritis. *BMJ Open Quality* 2019;**8**:e000549.  
52  
53  
54  
55  
56  
57  
58  
59  
60

- 1  
2  
3 73 Ionov MV, Zhukova OV, Yudina YS, *et al.* Value-based approach to blood pressure  
4 telemonitoring and remote counseling in hypertensive patients. *Blood Press* 2021;**30**:20–30.  
5  
6  
7 74 Goretti G, Marinari GM, Vanni E, *et al.* Value-Based Healthcare and Enhanced Recovery  
8 After Surgery Implementation in a High-Volume Bariatric Center in Italy. *Obes Surg*  
9 2020;**30**:2519–27.  
10  
11 75 Konda SR, Lott A, Egol KA. Development of a Value-based Algorithm for Inpatient Triage  
12 of Elderly Hip Fracture Patients. *J Am Acad Orthop Surg* 2020;**28**:e566–72.  
13  
14 76 Verberne WR, Dijkers J, Kelder JC, *et al.* Value-based evaluation of dialysis versus  
15 conservative care in older patients with advanced chronic kidney disease: A cohort study.  
16 *BMC Nephrol* 2018;**19**. doi:10.1186/s12882-018-1004-4  
17  
18 77 Hersh EH, Yaeger KA, Neifert SN, *et al.* Patterns of health care costs due to external  
19 ventricular drain infections. *World Neurosurg* 2019;**128**:e31–7.  
20  
21 78 Meara JG, Hughes CD, Sanchez K, *et al.* Optimal Outcomes Reporting (OOR): A New  
22 Value-Based Metric for Outcome Reporting Following Cleft Palate Repair. *Cleft Palate*  
23 *Craniofac J* 2021;**58**:19–24.  
24  
25 79 Kirsch DB, Yang H, Maslow AL, *et al.* Association of Positive Airway Pressure Use With  
26 Acute Care Utilization and Costs. *J Clin Sleep Med* 2019;**15**:1243–50.  
27  
28 80 van Dijk JTJM, van Essen TA, Dijkman MD, *et al.* Functional and patient-reported  
29 outcome versus in-hospital costs after traumatic acute subdural hematoma (t-ASDH): a  
30 neurosurgical paradox? *Acta Neurochir* Published Online First: 2019. doi:10.1007/s00701-  
31 019-03878-5  
32  
33 81 Lentz TA, Rhon DI, George SZ. Predicting Opioid Use, Increased Health Care Utilization  
34 and High Costs for Musculoskeletal Pain: What Factors Mediate Pain Intensity and  
35 Disability? *Journal of Pain* 2020;**21**:135–45.  
36  
37 82 Silva-Velazco J, Dietz DW, Stocchi L, *et al.* Considering Value in Rectal Cancer Surgery:  
38 An Analysis of Costs and Outcomes Based on the Open, Laparoscopic, and Robotic  
39 Approach for Proctectomy. *Ann Surg* 2017;**265**:960–8.  
40  
41 83 Vuong B, Dehal A, Uppal A, *et al.* What Are the Most Significant Cost and Value Drivers  
42 for Pancreatic Resection in an Integrated Healthcare System? *J Am Coll Surg* 2018;**227**:45–  
43 53.  
44  
45 84 Chawla SS, Whitson AJ, Schiffman CJ, *et al.* Drivers of lower inpatient hospital costs and  
46 greater improvements in health-related quality of life for patients undergoing total shoulder  
47 and ream-and-run arthroplasty. *J Shoulder Elbow Surg* Published Online First: 2021.  
48 doi:10.1016/j.jse.2020.10.030  
49  
50 85 Peard L, Goodwin J, Hensley P, *et al.* Examining and Understanding Value: The Impact of  
51 Preoperative Characteristics, Intraoperative Variables, and Postoperative Complications on  
52 Cost of Robot-Assisted Laparoscopic Radical Prostatectomy. *J Endourol* 2019;**33**:541–8.  
53  
54  
55  
56  
57  
58  
59  
60

- 1  
2  
3 86 Harris AM, Hensley P, Goodwin J, *et al.* Examining and understanding value: The cost of  
4 preoperative characteristics, intraoperative variables and postoperative complications of  
5 minimally invasive partial nephrectomy. *Urol Pract* 2019;**6**:215–21.  
6  
7  
8 87 Winegar AL, Jackson LW, Sambare TD, *et al.* A surgeon scorecard is associated with  
9 improved value in elective primary hip and knee arthroplasty. *Journal of Bone and Joint*  
10 *Surgery - American Volume* 2019;**101**:152–9.  
11  
12 88 Ramshaw B, Forman BR, Moore K, *et al.* Real-World Clinical Quality Improvement for  
13 Complex Abdominal Wall Reconstruction. *Surg Technol Int* 2017;**30**:155–64.  
14  
15 89 Heincelman M, Schumann SO, Riley J, *et al.* Identification of High Utilization Inpatients on  
16 Internal Medicine Services. *Am J Med Sci* 2016;**352**:63–70.  
17  
18 90 Ramly EP, Larentzakis A, Bohnen JD, *et al.* The financial impact of intraoperative adverse  
19 events in abdominal surgery. *Surgery* 2015;**158**:1382–8.  
20  
21 91 Geerdink TH, Haverlag R, van Veen RN, *et al.* [Direct discharge from the ED for patients  
22 with simple stable injuries: a Dutch pilot study]. *Ned Tijdschr Geneesk*  
23 2020;**164**.<https://www.ncbi.nlm.nih.gov/pubmed/32391996>  
24  
25  
26 92 Abdulla AG, Ituarte PH, Wiggins R, *et al.* Endocrine surgery as a model for value-based  
27 health care delivery. *Surg Neurol Int* 2012;**3**:163.  
28  
29 93 van der Meulen M, Zamanipoor Najafabadi AH, Lobatto DJ, *et al.* Healthcare utilization  
30 and costs among prolactinoma patients: a cross-sectional study and analysis of determinants.  
31 *Pituitary* 2021;**24**:79–95.  
32  
33 94 Lobatto DJ, Vliet Vlieland TPM, van den Hout WB, *et al.* Feasibility, safety, and outcomes  
34 of a stratified fast-track care trajectory in pituitary surgery. *Endocrine* 2020;**69**:175–87.  
35  
36 95 Jalilian H, Doshmangir L, Ajami S, *et al.* Economic burden of gastric cancer in the first six  
37 months after diagnosis. *Int J Pharm Healthc Mark* 2019;**13**:436–46.  
38  
39 96 Lobatto DJ, van den Hout WB, Najafabadi AHZ, *et al.* Healthcare utilization and costs  
40 among patients with non-functioning pituitary adenomas. *Endocrine* 2019;**64**:330–40.  
41  
42 97 Yanik JM, Bedard NA, Hanley JM, *et al.* Rapid Recovery Total Joint Arthroplasty is Safe,  
43 Efficient, and Cost-Effective in the Veterans Administration Setting. *J Arthroplasty*  
44 2018;**33**:3138–42.  
45  
46 98 Weir TB, Usmani MF, Camacho J, *et al.* Effect of surgical setting on cost and hospital  
47 reported outcomes for single-level anterior cervical discectomy and fusion. *Int J Spine Surg*  
48 2021;**15**:701–9.  
49  
50 99 Gálvez ACM, Sánchez FJ, Moreno CA, *et al.* Value-based healthcare in ostomies. *Int J*  
51 *Environ Res Public Health* 2020;**17**:1–15.  
52  
53  
54  
55  
56  
57  
58  
59  
60



- 1  
2  
3 100 Burnhope E, Waring M, Guilder A, *et al.* A systematic approach towards implementing  
4 value-based health care in heart failure: Understandings from retrospective analysis methods  
5 in South London. *Health Serv Manage Res* Published Online First: 2020.  
6 doi:10.1177/0951484820971442  
7
- 8  
9 101 Kirsch DB, Yang H, Maslow AL, *et al.* Association of positive airway pressure use with  
10 acute care utilization and costs. *J Clin Sleep Med* 2019;**15**:1243–50.  
11
- 12 102 Khanijow AN, Wood LN, Xie R, *et al.* The impact of an enhanced recovery program (ERP)  
13 on the costs of colorectal surgery. *Am J Surg* 2021;**222**:186–92.  
14
- 15 103 Fernando-Canavan L, Gust A, Hsueh A, *et al.* Measuring the economic impact of hospital-  
16 acquired complications on an acute health service. *Aust Health Rev* 2021;**45**:135–42.  
17
- 18 104 Pasquali SK, Thibault D, Hall M, *et al.* Evolving Cost-Quality Relationship in Pediatric  
19 Heart Surgery. *Ann Thorac Surg* Published Online First: 8 June 2021.  
20 doi:10.1016/j.athoracsur.2021.05.050  
21
- 22 105 Negrini R, da Silva Ferreira RD, Guimaraes DZ. Value-based care in obstetrics: comparison  
23 between vaginal birth and caesarean section. *BMC Pregnancy Childbirth* 2021;**21**:333.  
24
- 25 106 Islam MK, Ruths S, Jansen K, *et al.* Evaluating an integrated care pathway for frail elderly  
26 patients in Norway using multi-criteria decision analysis. *BMC Health Serv Res* 2021;**21**:1–  
27 16.  
28
- 29 107 Fontebasso AM, Figueira S, Thavorn K, *et al.* Financial implications of trauma patients at a  
30 Canadian level 1 trauma center: a retrospective cohort study. *Trauma Surg Acute Care Open*  
31 2020;**5**:e000568.  
32
- 33 108 Robinson JR, Avritscher EBC, Gay JC, *et al.* Measuring the Value of a Clinical Practice  
34 Guideline for Children with Perforated Appendicitis. *Ann Surg* 2017;**266**:195–200.  
35
- 36 109 Sun LL, Cao DY, Yang JX, *et al.* Value-based medicine analysis on loop electrosurgical  
37 excision procedure and CO2 laser vaporization for the treatment of cervical intraepithelial  
38 neoplasia 2. *J Obstet Gynaecol Res* 2012;**38**:1064–70.  
39
- 40 110 Fürstenau D, Haneke H, Spies C, *et al.* Tackling the frailty burden with an integrative value-  
41 based approach: results from a mixed-methods study. *J Public Health* 2022;**30**:99–110.  
42
- 43 111 Ebinger JE, Strauss CE, Garberich RR, *et al.* Value-based ST-segment-elevation myocardial  
44 infarction care using risk-guided triage and early discharge. *Circ Cardiovasc Qual*  
45 *Outcomes* 2018;**11**. doi:10.1161/CIRCOUTCOMES.118.004553  
46
- 47 112 Jain N, Brock JL, Phillips FM, *et al.* Chronic preoperative opioid use is a risk factor for  
48 increased complications, resource use, and costs after cervical fusion. *Spine J*  
49 2018;**18**:1989–98.  
50  
51  
52  
53  
54  
55  
56  
57  
58  
59  
60

- 1  
2  
3 113 Rice-Townsend S, Barnes JN, Hall M, *et al.* Variation in practice and resource utilization  
4 associated with the diagnosis and management of appendicitis at freestanding children's  
5 hospitals: Implications for value-based comparative analysis. *Ann Surg* 2014;**259**:1228–34.  
6  
7  
8 114 Burnett RA Iii, Yang J, Courtney PM, *et al.* Costs of unicompartmental compared with total  
9 knee arthroplasty : a matched cohort study over ten years. *Bone Joint J* 2021;**103-B**:23–31.  
10  
11 115 Cronin KJ, Mair SD, Hawk GS, *et al.* Increased Health Care Costs and Opioid Use in  
12 Patients with Anxiety and Depression Undergoing Rotator Cuff Repair. *Arthroscopy -*  
13 *Journal of Arthroscopic and Related Surgery* 2020;**36**:2655–60.  
14  
15 116 Robles AJ, Kornblith LZ, Hendrickson CM, *et al.* Health care utilization and the cost of  
16 posttraumatic acute respiratory distress syndrome care. *J Trauma Acute Care Surg*  
17 2018;**85**:148–54.  
18  
19 117 Brown MM, Brown GC, Brown HC, *et al.* A Value-Based Medicine Analysis of  
20 Ranibizumab for the Treatment of Subfoveal Neovascular Macular Degeneration.  
21 *Ophthalmology* 2008;**115**:1039-1045.e5.  
22  
23  
24 118 Chovanec KA, Arsene C, Beck A, *et al.* Why not home?: A study of the impact of an effort  
25 to reduce postacute expenditures. *Prof Case Manag* 2022;**27**:3–11.  
26  
27 119 Brown GC, Brown MM, Brown HC, *et al.* A Value-Based Medicine Comparison of  
28 Interventions for Subfoveal Neovascular Macular Degeneration. *Ophthalmology*  
29 2007;**114**:1170–8.  
30  
31 120 van Deen WK, Spiro A, Burak Ozbay A, *et al.* The impact of value-based healthcare for  
32 inflammatory bowel diseases on healthcare utilization: a pilot study. *Eur J Gastroenterol*  
33 *Hepatol* 2017;**29**:331–7.  
34  
35  
36 121 Annabathula R, Dugan A, Bhalla V, *et al.* Value-based assessment of implementing a  
37 Pulmonary Embolism Response Team (PERT). *J Thromb Thrombolysis* 2021;**51**:217–25.  
38  
39 122 Ennis RD, Parikh AB, Sanderson M, *et al.* Interpreting oncology care model data to drive  
40 value-based care: A prostate cancer analysis. *J Oncol Pract* 2019;**15**:E238–46.  
41  
42 123 Denny JC, Cyr DD, Witsell DL, *et al.* A pathway to value-based care of chronic  
43 rhinosinusitis using a claims database. *Laryngoscope Investigative Otolaryngology*  
44 2019;**4**:193–206.  
45  
46 124 Peele P, Keyser D, Lovelace J, *et al.* Advancing Value-Based Population Health  
47 Management Through Payer-Provider Partnerships: Improving Outcomes for Children with  
48 Complex Conditions. *J Healthc Qual* 2018;**40**:e26–32.  
49  
50 125 Khullar OV, Jiang R, Force SD, *et al.* Transthoracic versus transhiatal resection for  
51 esophageal adenocarcinoma of the lower esophagus: A value-based comparison. *J Surg*  
52 *Oncol* 2015;**112**:517–23.  
53  
54  
55  
56  
57  
58  
59  
60

- 1  
2  
3 126 Ramirez MM, Brennan GP. Using the value-based care paradigm to compare physical  
4 therapy access to care models in cervical spine radiculopathy: a case report. *Physiother*  
5 *Theory Pract* 2020;**36**:1476–84.  
6  
7  
8 127 Regan DK, Manoli A, Hutzler L, *et al.* Impact of Diabetes Mellitus on Surgical Quality  
9 Measures After Ankle Fracture Surgery: Implications for Value-Based Compensation and  
10 Pay for Performance. *J Orthop Trauma* 2015;**29**:e483-486.  
11  
12 128 Kadakia RJ, Ahearn BM, Tenenbaum S, *et al.* Costs Associated With Geriatric Ankle  
13 Fractures. *Foot Ankle Spec* 2017;**10**:26–30.  
14  
15 129 Barkley R, Soobader MJ, Wang J, *et al.* Reducing cancer costs through symptom  
16 management and triage pathways. *J Oncol Pract* 2019;**15**:E91–7.  
17  
18 130 Suidan RS, He W, Sun CC, *et al.* Total and out-of-pocket costs of different primary  
19 management strategies in ovarian cancer. *Am J Obstet Gynecol* 2019;**221**:136.e1-136.e9.  
20  
21 131 Hemmila MR, Cain-Nielsen AH, Wahl WL, *et al.* Regional collaborative quality  
22 improvement for trauma reduces complications and costs. *J Trauma Acute Care Surg*  
23 2015;**78**:78–85.  
24  
25  
26 132 AlAshqar A, Goktepe ME, Kilic GS, *et al.* Predictors of the cost of hysterectomy for benign  
27 indications. *J Gynecol Obstet Hum Reprod* 2021;**50**:101936.  
28  
29 133 Naghavi AO, Gonzalez RJ, Scott JG, *et al.* Staged reconstruction brachytherapy has lower  
30 overall cost in recurrent soft-tissue sarcoma. *J Contemp Brachytherapy* 2017;**9**:20–9.  
31  
32 134 Puvanesarajah V, Kirby DJ, Jain A, *et al.* Cost Variation of Anterior Cervical Fusions in  
33 Elderly Medicare Beneficiaries. *Spine* 2017;**42**:E1010–5.  
34  
35 135 Passias PG, Poorman GW, Bortz CA, *et al.* Predictors of adverse discharge disposition in  
36 adult spinal deformity and associated costs. *Spine J* 2018;**18**:1845–52.  
37  
38 136 Manriquez E, Mandelbaum A, Aguayo E, *et al.* Factors associated with high-cost  
39 hospitalizations in elderly ovarian cancer patients. *Gynecol Oncol* 2020;**159**:767–72.  
40  
41 137 Rocque GB, Pisu M, Jackson BE, *et al.* Resource Use and Medicare Costs During Lay  
42 Navigation for Geriatric Patients With Cancer. *JAMA Oncol* 2017;**3**:817–25.  
43  
44 138 Brixner D, Rubin DT, Mease P, *et al.* Patient support program increased medication  
45 adherence with lower total health care costs despite increased drug spending. *Journal of*  
46 *Managed Care and Specialty Pharmacy* 2019;**25**:770–9.  
47  
48 139 Alli VV, Zhang J, Telem DA. Impact of incisional hernia development following abdominal  
49 operations on total healthcare cost. *Surg Endosc* 2018;**32**:2381–6.  
50  
51 140 Thakore RV, Greenberg SE, Shi H, *et al.* Surgical site infection in orthopedic trauma: A  
52 case-control study evaluating risk factors and cost. *Journal of Clinical Orthopaedics and*  
53 *Trauma* 2015;**6**:220–6.  
54  
55  
56  
57  
58  
59  
60

- 1  
2  
3 141 Smith BD, Jiang J, Shih YC, *et al.* Cost and complications of local therapies for early-stage  
4 breast cancer. *J Natl Cancer Inst* 2017;**109**. doi:10.1093/jnci/djw178  
5  
6 142 Klink AJ, Chmielowski B, Feinberg B, *et al.* Health care resource utilization and costs in  
7 first-line treatments for patients with metastatic melanoma in the United States. *Journal of*  
8 *Managed Care and Specialty Pharmacy* 2019;**25**:869–77.  
9  
10 143 Chotai S, Sivaganesan A, Parker SL, *et al.* Drivers of Variability in 90-Day Cost for  
11 Elective Anterior Cervical Discectomy and Fusion for Cervical Degenerative Disease. *Clin*  
12 *Neurosurg* 2018;**83**:898–904.  
13  
14 144 Ackerman RS, Hirschi M, Alford B, *et al.* Enhanced REVENUE after surgery? A cost-  
15 standardized enhanced recovery pathway for mastectomy decreases length of stay. *World J*  
16 *Surg* 2019;**43**:839–45.  
17  
18 145 Williams SB, Shan Y, Jazzar U, *et al.* Comparing Survival Outcomes and Costs Associated  
19 with Radical Cystectomy and Trimodal Therapy for Older Adults with Muscle-Invasive  
20 Bladder Cancer. *JAMA Surg* 2018;**153**:881–9.  
21  
22 146 Schilling PL, He J, Chen S, *et al.* Risk-Adjusted Cost Performance for 90-Day Total Hip  
23 Arthroplasty Episodes: Comparing US Hospitals Nationwide Before CJR. *J Arthroplasty*  
24 2020;**35**:3452–63.  
25  
26 147 Ackerman SJ, Knight T, Wahl PM, *et al.* Health care utilization and costs following  
27 amplified versus non-amplified molecular probe testing for symptomatic patients with  
28 suspected vulvovaginitis: A us commercial payer population. *Clinicoecon Outcomes Res*  
29 2019;**11**:179–89.  
30  
31 148 Patel MI, Ramirez D, Agajanian R, *et al.* Lay health worker-led cancer symptom screening  
32 intervention and the effect on patient-reported satisfaction, health status, health care use, and  
33 total costs: Results from a tri-part collaboration. *J Oncol Pract* 2020;**16**:E19–28.  
34  
35 149 Stearns LJ, Narang S, Albright RE, *et al.* Assessment of Health Care Utilization and Cost of  
36 Targeted Drug Delivery and Conventional Medical Management vs Conventional Medical  
37 Management Alone for Patients With Cancer-Related Pain. *JAMA Netw Open*  
38 2019;**2**:e191549.  
39  
40 150 Skill NJ, Butler J, O'Brien DC, *et al.* Financial Burden of Liver Transplant vs Resection for  
41 Hepatocellular Carcinoma. *Transplant Proc* 2019;**51**:1907–12.  
42  
43 151 Karnuta JM, Navarro SM, Haeberle HS, *et al.* Predicting Inpatient Payments Prior to Lower  
44 Extremity Arthroplasty Using Deep Learning: Which Model Architecture Is Best? *J*  
45 *Arthroplasty* 2019;**34**:2235-2241.e1.  
46  
47 152 Ning MS, Palmer MB, Shah AK, *et al.* Three-Year Results of a Prospective Statewide  
48 Insurance Coverage Pilot for Proton Therapy: Stakeholder Collaboration Improves Patient  
49 Access to Care. *JCO Oncol Pract* 2020;**16**:e966–76.  
50  
51  
52  
53  
54  
55  
56  
57  
58  
59  
60

- 1  
2  
3 153 Keller DS, Zhang J, Chand M. Opioid-free colorectal surgery: a method to improve patient  
4 & financial outcomes in surgery. *Surg Endosc* 2019;**33**:1959–66.  
5  
6 154 Rocque GB, Williams CP, Kenzik KM, *et al.* Where are the opportunities for reducing  
7 health care spending within alternative payment models? *J Oncol Pract* 2018;**14**:e375–83.  
8  
9 155 Sheetz KH, Kenney B, Dupree JM, *et al.* Targeting Value-Driven Quality Improvement for  
10 Laparoscopic Cholecystectomy in Michigan. *Ann Surg* 2019;**269**:127–32.  
11  
12 156 Zolin SJ, Tastaldi L, Alkhatib H, *et al.* Open retromuscular versus laparoscopic ventral  
13 hernia repair for medium-sized defects: where is the value? *Hernia* 2020;**24**:759–70.  
14  
15 157 Orhurhu V, Urits I, Olusunmade M, *et al.* Trends of Co-Morbid Depression in Hospitalized  
16 Patients with Failed Back Surgery Syndrome: An Analysis of the Nationwide Inpatient  
17 Sample. *Pain and Therapy* 2018;**7**:217–26.  
18  
19 158 Hollenbeck B, Hoffman MA, Tromanhauser SG. High-Volume Arthroplasty Centers  
20 Demonstrate Higher Composite Quality Scores and Enhanced Value: Perspective on Higher-  
21 Volume Hospitals Performing Arthroplasty from 2001 to 2011. *Journal of Bone and Joint*  
22 *Surgery - American Volume* 2020;**102**:362–7.  
23  
24 159 Loftus TJ, Rosenthal MD, Croft CA, *et al.* Effect of time to operation on value of care in  
25 acute care surgery. *World J Surg* 2018;**42**:2356–63.  
26  
27 160 Buell JF, Sigmon D, Ducoin C, *et al.* Initial Experience with Biologic Polymer Scaffold  
28 (Poly-4-hydroxybuturate) in Complex Abdominal Wall Reconstruction. *Ann Surg*  
29 2017;**266**:185–8.  
30  
31 161 Jain N, Phillips FM, Shimer AL, *et al.* Surgeon Reimbursement Relative to Hospital  
32 Payments for Spinal Fusion: Trends From 10-year Medicare Analysis. *Spine* 2018;**43**:720–  
33 31.  
34  
35 162 Stull JD, Bhat SB, Kane JM, *et al.* Economic Burden of Inpatient Admission of Ankle  
36 Fractures. *Foot Ankle Int* 2017;**38**:997–1004.  
37  
38 163 Lewis RB, Hariri O, Elliott ME, *et al.* Financial Analysis of Closed Femur Fractures in 3- to  
39 6-Year-Olds Treated with Immediate Spica Casting Versus Intramedullary Fixation. *Journal*  
40 *of Pediatric Orthopaedics* 2019;**39**:E114–9.  
41  
42 164 Murphy WS, Cheng T, Lin B, *et al.* Higher Volume Surgeons Have Lower Medicare  
43 Payments, Readmissions, and Mortality After THA. *Clin Orthop Relat Res* 2019;**477**:334–  
44 41.  
45  
46 165 King AM, Danagoulian S, Lynch M, *et al.* The Effect of a Medical Toxicology Inpatient  
47 Service in an Academic Tertiary Care Referral Center. *J Med Toxicol* 2019;**15**:12–21.  
48  
49 166 Click B, Lopez R, Arrigain S, *et al.* Shifting Cost-drivers of Health Care Expenditures in  
50 Inflammatory Bowel Disease. *Inflamm Bowel Dis* 2020;**26**:1268–75.  
51  
52  
53  
54  
55  
56  
57  
58  
59  
60

- 1  
2  
3 167 Padilla JA, Gabor JA, Ryan SP, *et al.* Total Hip Arthroplasty for Femoral Neck Fracture:  
4 The Economic Implications of Orthopedic Subspecialty Training. *J Arthroplasty*  
5 2020;**35**:S101–6.  
6  
7 168 Pang J, Crawford K, Faraji F, *et al.* An Analysis of 1-Year Charges for Head and Neck  
8 Cancer: Targets for Value-Based Interventions. *Otolaryngol Head Neck Surg*  
9 2020;**163**:546–53.  
10  
11 169 Patel MI, Ramirez D, Agajanian R, *et al.* Association of a Lay Health Worker Intervention  
12 With Symptom Burden, Survival, Health Care Use, and Total Costs Among Medicare  
13 Enrollees With Cancer. *JAMA Netw Open* 2020;**3**:e201023.  
14  
15 170 Thaci B, McGirt MJ, Ammerman JM, *et al.* Reduction of direct costs in high-risk lumbar  
16 discectomy patients during the 90-day post-operative period through annular closure.  
17 *Clinicoecon Outcomes Res* 2019;**11**:191–7.  
18  
19 171 Gupta P, Rettiganti M. Relationship of Hospital Costs With Mortality in Pediatric Critical  
20 Care: A Multi-Institutional Analysis. *Pediatr Crit Care Med* 2017;**18**:541–9.  
21  
22 172 Nelson AA, Pearce DJ, Fleischer AB, *et al.* Infliximab for inpatient psoriasis management -  
23 is there a role? *J Dermatolog Treat* 2005;**16**:314–8.  
24  
25 173 Zhang S, Vora M, Harris AHS, *et al.* Cost-Minimization Analysis of Open and Endoscopic  
26 Carpal Tunnel Release. *J Bone Joint Surg Am* 2016;**98**:1970–7.  
27  
28 174 Adenikinju A, Ranson R, Rettig SA, *et al.* Ability of a Risk Prediction Tool to Stratify  
29 Quality and Cost for Older Patients With Operative Distal Radius Fractures. *Geriatr Orthop*  
30 *Surg Rehabil* 2021;**12**:2151459321999634.  
31  
32 175 Baughman DJ, Waheed A, Khan MN, *et al.* Enhancing Value-Based Care With a Walk-in  
33 Clinic: A Primary Care Provider Intervention to Decrease Low Acuity Emergency  
34 Department Overutilization. *Cureus* 2021;**13**:e13284.  
35  
36 176 Berinstein JA, Cohen-Mekelburg SA, Greenberg GM, *et al.* A Care Coordination  
37 Intervention Improves Symptoms But Not Charges in High-Risk Patients With  
38 Inflammatory Bowel Disease. *Clinical Gastroenterology & Hepatology* Published Online  
39 First: 28 August 2021. doi:10.1016/j.cgh.2021.08.034  
40  
41 177 Beschloss A, Dicindio C, Lombardi J, *et al.* Marked increase in Spinal Deformity Surgery  
42 throughout the United States. *Spine* 2021;**46**:1402–8.  
43  
44 178 Jang DW, Lee HJ, Chen PG, *et al.* Geographic variations in healthcare utilization and  
45 expenditure for chronic rhinosinusitis: A population-based approach. *Laryngoscope*  
46 2021;**131**:2641–8.  
47  
48 179 Ko H, Brodke DS, Vanneman ME, *et al.* Is discretionary care associated with safety among  
49 Medicare beneficiaries undergoing spine surgery? *J Bone Joint Surg Am* 2021;**Publish**  
50 **Ahead of Print.** doi:10.2106/JBJS.21.00389  
51  
52  
53  
54  
55  
56  
57  
58  
59  
60

- 1  
2  
3 180 Malik AT, Khan SN, Voskuil RT, *et al.* What is the value of undergoing surgery for spinal  
4 metastases at Dedicated Cancer Centers? *Clin Orthop Relat Res* 2021;**479**:1311–9.  
5  
6 181 Newman TV, Munshi KD, Neilson LM, *et al.* Health care utilization and costs associated  
7 with switching from DPP-4i to GLP-1RA or SGLT2i: an observational cohort study.  
8 *Journal of Managed Care & Specialty Pharmacy* 2021;**27**:435–43.  
9  
10 182 Tomicki S, Dieguez G, Latimer H, *et al.* Real-World Cost of Care for Commercially Insured  
11 versus Medicare Patients with Metastatic Pancreatic Cancer Who Received Guideline-  
12 Recommended Therapies. *American Health & Drug Benefits* 2021;**14**:70–8.  
13  
14 183 Buell JF, Flaris AN, Raju S, *et al.* Long-Term Outcomes in Complex Abdominal Wall  
15 Reconstruction Repaired With Absorbable Biologic Polymer Scaffold (Poly-4-  
16 Hydroxybutyrate). *Annals of Surgery Open* 2021;**2**:e032.  
17  
18 184 King BC, Richardson T, Patel RM, *et al.* Prioritization framework for improving the value  
19 of care for very low birth weight and very preterm infants. *J Perinatol* 2021;**41**:2463–73.  
20  
21 185 Skibicki H, Yayac M, Krueger CA, *et al.* Target price adjustment for hip fractures is not  
22 sufficient in the Bundled Payments for Care Improvement initiative. *J Arthroplasty*  
23 2021;**36**:47–53.  
24  
25 186 Clewley D, Iftikhar Y, Horn ME, *et al.* Do the number of visits and the cost of  
26 musculoskeletal care improve outcomes? More may not be better. *J Orthop Sports Phys*  
27 *Ther* 2020;**50**:642–8.  
28  
29 187 Walker B, Wilfong L, Frytak J, *et al.* Practice patterns among oncologists participating in  
30 the oncology care model after three years. *J Cancer Policy* 2021;**29**:100294.  
31  
32 188 Krueger CA, Yayac M, Vannello C, *et al.* Are we at the bottom? BPCI programs now  
33 disincentivize providers who maintain quality despite caring for increasingly complex  
34 patients. *J Arthroplasty* 2021;**36**:13–8.  
35  
36 189 Horton BS, Marland JD, West HS, *et al.* Transition to telehealth physical therapy after hip  
37 arthroscopy for femoroacetabular impingement: A pilot study with retrospective matched-  
38 cohort analysis. *Orthop J Sports Med* 2021;**9**:2325967121997469.  
39  
40 190 Nguyen NH, Luo J, Ohno-Machado L, *et al.* Burden and outcomes of fragmentation of care  
41 in hospitalized patients with inflammatory bowel diseases: A nationally representative  
42 cohort. *Inflamm Bowel Dis* 2021;**27**:1026–34.  
43  
44 191 Gregory D, Scotti DJ, de Lissovoy G, *et al.* A value-based analysis of hemodynamic support  
45 strategies for high-risk heart failure patients undergoing a percutaneous coronary  
46 intervention. *Am Health Drug Benefits* 2013;**6**:88–99.  
47  
48 192 Schwartz DA, Shah AA, Zogg CK, *et al.* Operative delay to laparoscopic cholecystectomy:  
49 Racking up the cost of health care. *J Trauma Acute Care Surg* 2015;**79**:15–21.  
50  
51  
52  
53  
54  
55  
56  
57  
58  
59  
60

- 1  
2  
3 193 Aguayo E, Sanaiha Y, Seo YJ, *et al.* Heparin-induced thrombocytopenia in cardiac surgery:  
4 Incidence, costs, and duration of stay. *Surgery* 2018;**164**:1377–81.  
5  
6 194 Canizares MF, Feldman L, Miller PE, *et al.* Complications and Cost of Syndactyly  
7 Reconstruction in the United States: Analysis of the Pediatric Health Information System.  
8 *Hand* 2017;**12**:327–34.  
9  
10 195 Sanaiha Y, Mantha A, Ziaecian B, *et al.* Trends in Readmission and Costs After  
11 Transcatheter Implantation Versus Surgical Aortic Valve Replacement in Patients With  
12 Renal Dysfunction. *Am J Cardiol* 2019;**123**:1481–8.  
13  
14 196 Sanaiha Y, Kavianpour B, Downey P, *et al.* National Study of Index and Readmission  
15 Mortality and Costs for Thoracic Endovascular Aortic Repair in Patients With Renal  
16 Disease. *Ann Thorac Surg* 2020;**109**:458–64.  
17  
18 197 Labovitz JM, Kominski GF. Forecasting the value of podiatric medical care in newly  
19 insured diabetic patients during implementation of the affordable care act in California. *J*  
20 *Am Podiatr Med Assoc* 2016;**106**:163–71.  
21  
22 198 Johnson JT, Scholtens DM, Kuang A, *et al.* Does Value Vary by Center Surgical Volume  
23 for Neonates With Truncus Arteriosus? A Multicenter Study. *Ann Thorac Surg* Published  
24 Online First: 2021. doi:10.1016/j.athoracsur.2020.05.178  
25  
26 199 Saifi C, Cazzulino A, Park C, *et al.* National Trends for Primary and Revision Lumbar Disc  
27 Arthroplasty Throughout the United States. *Global Spine Journal* 2018;**8**:172–7.  
28  
29 200 Boucek DM, Lal AK, Eckhauser AW, *et al.* Resource Utilization for Initial Hospitalization  
30 in Pediatric Heart Transplantation in the United States. *Am J Cardiol* 2018;**121**:981–5.  
31  
32 201 Laratta JL, Reddy H, Lombardi JM, *et al.* Utilization of Interspinous Devices Throughout  
33 the United States Over a Recent Decade: An Analysis of the Nationwide Inpatient Sample.  
34 *Global Spine Journal* 2018;**8**:382–7.  
35  
36 202 Karnuta JM, Golubovsky JL, Haeberle HS, *et al.* Can a machine learning model accurately  
37 predict patient resource utilization following lumbar spinal fusion? *Spine J* 2020;**20**:329–36.  
38  
39 203 Karnuta JM, Navarro SM, Haeberle HS, *et al.* Bundled Care for Hip Fractures: A Machine-  
40 Learning Approach to an Untenable Patient-Specific Payment Model. *J Orthop Trauma*  
41 2019;**33**:324–30.  
42  
43 204 Navarro SM, Ramkumar PN, Egger AC, *et al.* Evidence-Based Thresholds for the Volume-  
44 Value Relationship in Adolescent Idiopathic Scoliosis: Outcomes and Economies of Scale.  
45 *Spine Deformity* 2018;**6**:156–63.  
46  
47 205 Bateni SB, Gingrich AA, Hoch JS, *et al.* Defining Value for Pancreatic Surgery in Early-  
48 Stage Pancreatic Cancer. *JAMA Surg* 2019;**154**. doi:10.1001/jamasurg.2019.3019  
49  
50  
51  
52  
53  
54  
55  
56  
57  
58  
59  
60



- 1  
2  
3 206 Xiao R, Miller JA, Zafirau WJ, *et al.* Impact of Home Health Care on Health Care Resource  
4 Utilization Following Hospital Discharge: A Cohort Study. *Am J Med* 2018;**131**:395-  
5 407.e35.  
6  
7 207 Gandjian M, Williamson C, Sanaiha Y, *et al.* Continued Relevance of Minimum Volume  
8 Standards for Elective Esophagectomy: A National Perspective. *Ann Thorac Surg* Published  
9 Online First: 23 August 2021. doi:10.1016/j.athoracsur.2021.07.061  
10  
11 208 Hadaya J, Sanaiha Y, Hernandez R, *et al.* Impact of hospital volume on resource use after  
12 elective cardiac surgery: A contemporary analysis. *Surgery* 2021;**170**:682–8.  
13  
14 209 Seyidova N, Chen AD, del Valle D, *et al.* Nationwide cost variation for lower extremity flap  
15 reconstruction. *Eur J Plast Surg* 2021;**44**:475–82.  
16  
17 210 Sanaiha Y, Downey P, Lyons R, *et al.* Trends in utilization, mortality, and resource use after  
18 implantation of left ventricular assist devices in the United States. *J Thorac Cardiovasc Surg*  
19 2021;**161**:2083-2091.e4.  
20  
21 211 Frankel WC, Navarro SM, Haeberle HS, *et al.* Optimizing the Volume–Value Relationship  
22 in Laminectomy. *Spine* 2019;**44**:659–69.  
23  
24 212 Miller PE, Guha A, Khera R, *et al.* National Trends in Healthcare-Associated Infections for  
25 Five Common Cardiovascular Conditions. *Am J Cardiol* 2019;**124**:1140–8.  
26  
27 213 Mukdad L, Mantha A, Aguayo E, *et al.* Readmission and resource utilization after  
28 orthotopic heart transplant versus ventricular assist device in the National Readmissions  
29 Database, 2010–2014. *Surgery* 2018;**164**:274–81.  
30  
31 214 Navarro SM, Wang EY, Haeberle HS, *et al.* Machine Learning and Primary Total Knee  
32 Arthroplasty: Patient Forecasting for a Patient-Specific Payment Model. *J Arthroplasty*  
33 2018;**33**:3617–23.  
34  
35 215 Iloabuchi C, Dwibedi N, LeMasters T, *et al.* Low-value care and excess out-of-pocket  
36 expenditure among older adults with incident cancer – A machine learning approach.  
37 *Journal of Cancer Policy* 2021;**30**:100312.  
38  
39 216 Siu VJ, Varkey T, Khan UN, *et al.* Lend Me a Hand: A Value-Based Care Case Study on  
40 Pan Plexopathy of Unknown Origin. *Cureus* 2021;**13**.  
41  
42  
43  
44  
45  
46  
47  
48  
49  
50  
51  
52  
53  
54  
55  
56  
57  
58  
59  
60

Inclusions RQ1 (215) extracted data to be shared with Erasmus Data Repository (FigShare)

| Authors                                                                                                                       | Year Pub | Title paper (see full reference in manuscript)                                                                                                   | Geography (country) of study | Geography, state of country, if N/A country | study design (if incl. in RQ2)                                   | unit of analysis                                                                            | disease/topic labels provided by study (overlapping tags, can be multiple)                      | Medical Specialty (non overlapping labels) | Medical Specialty sub category, where applicable | Care path studied                         | Costs included      | Costs perspective (all) | Primary Cost perspective | Secondary Cost perspective if applicable | Costing method used as described in study                     | Primary Costing method classification    | Secondary Costing method classification, if applicable | Implementation of costing method (N/A if reimbursements or charges, unspecified if not discussed in study) | if reimbursement: actual measurement used for estimation | RQ2 included - discuss consequences or impact of cost information in study |
|-------------------------------------------------------------------------------------------------------------------------------|----------|--------------------------------------------------------------------------------------------------------------------------------------------------|------------------------------|---------------------------------------------|------------------------------------------------------------------|---------------------------------------------------------------------------------------------|-------------------------------------------------------------------------------------------------|--------------------------------------------|--------------------------------------------------|-------------------------------------------|---------------------|-------------------------|--------------------------|------------------------------------------|---------------------------------------------------------------|------------------------------------------|--------------------------------------------------------|------------------------------------------------------------------------------------------------------------|----------------------------------------------------------|----------------------------------------------------------------------------|
| Gálvez, A. C. M. Sánchez, F. J. Moreno, C. A. Pérez Fernández, A. J. García, R. B. López, M. C. <del>Quintana, M. D. P.</del> | 2020     | Value-based healthcare in ostomies                                                                                                               | Andalusia                    | Andalusia                                   |                                                                  | 71 surgical ostomy patients                                                                 | digestive, urology, surgical                                                                    | Urology                                    |                                                  | partial care path (full surgical episode) | Direct and indirect | provider                | provider                 |                                          | unspecified                                                   | Absorption costing - unspecified/generic |                                                        | Paper only                                                                                                 |                                                          | no                                                                         |
| McLaughlin, N. Upadhyaya, P. Bussey, F. Martin, N. A.                                                                         | 2014     | Value-based neurosurgery: Measuring and reducing the cost of microvascular decompression surgery                                                 | US                           | US: California                              | single center, retrospective                                     | 44 neurosurgical patients                                                                   | neurosurgical, microvascular decompression, trigeminal neuralgia (TN) or hemifacial spasm (HFS) | Surgical                                   | Neurosurgery                                     | partial care path (full surgical episode) | Direct and indirect | provider                | provider                 |                                          | ABC                                                           | Absorption costing - ABC                 |                                                        | implemented                                                                                                |                                                          | yes see second sheet                                                       |
| Hennink, S. D. Hofland, N. Gopic, J. P. Van Der Kaa, C. De Koning, K. Nielsen, M. <del>Tone, C.</del>                         | 2016     | Value-based healthcare in Lynch syndrome                                                                                                         | The Netherlands              | The Netherlands                             |                                                                  | 64 Lynch Syndrome patients                                                                  | oncology, lynch syndrome, colorectal cancer                                                     | Oncology                                   |                                                  | full care path                            | Direct and indirect | provider                | provider                 |                                          | unspecified                                                   | Absorption costing - unspecified/generic |                                                        | unspecified                                                                                                |                                                          | no                                                                         |
| French, K. E. Guzman, A. B. Rubio, A. C. Frenzel, J. C. Feeley, T. W.                                                         | 2016     | Value based care and bundled payments: Anesthesia care costs for outpatient oncology surgery using time-driven activity-based costing            | US                           | US: Virginia                                | single center, retrospective, multiple care paths                | 5,357 outpatient anesthesia cases across 11 procedure groups                                | oncology                                                                                        | Oncology                                   |                                                  | partial care path (full surgical episode) | Direct and indirect | provider                | provider                 |                                          | TDABC                                                         | Absorption costing - TDABC               |                                                        | implemented                                                                                                |                                                          | yes see second sheet                                                       |
| Tan, R. Y. C. Met-Domestici, M. Zhou, K. Guzman, A. B. Lim, S. T. Soo, K. C. <del>Feeley, T. W.</del>                         | 2016     | Using quality improvement methods and time-driven activity-based costing to improve value-based cancer care delivery at a Cancer Genetics clinic | Singapore                    | Singapore                                   | single center, retrospective, process mapping, observation       | 251 Patients with high-risk features suggestive of hereditary cancer                        | oncology, genetics, Cancer genetics                                                             | Oncology                                   |                                                  | partial care path                         | Direct              | provider                | provider                 |                                          | TDABC                                                         | Direct costing                           |                                                        | unspecified                                                                                                |                                                          | no                                                                         |
| Daniyants, N. MacKoul, P. Baxi, R. van der Does, L. Q. Haworth, L. R.                                                         | 2019     | Value-based assessment of hysterectomy approaches                                                                                                | US                           | US: Maryland                                | single center, retrospective                                     | 2689 patients, female, 18 or over                                                           | gynecology, vaginal hysterectomy, robot, robot-assisted                                         | gynecology & obstetrics                    |                                                  | partial care path (full surgical episode) | Direct and indirect | provider                | provider                 |                                          | Microcosting supplemented with charges                        | Absorption costing - unspecified/generic |                                                        | Paper only                                                                                                 |                                                          | yes see second sheet                                                       |
| Hernandez, A. Kaplan, R. S. Wikowski, M. L. Forrest Faison, C. Porter, M. E.                                                  | 2019     | Navy medicine introduces value-based health care                                                                                                 | US                           | US: Florida                                 | single center, retrospective, multiple care paths, pilot project | 22877 patients total                                                                        | pregnancy, osteoarthritis, diabetes, lower back pain, multiple                                  | gynecology & obstetrics                    |                                                  | full care path                            | Direct and indirect | provider                | provider                 |                                          | TDABC                                                         | Absorption costing - TDABC               |                                                        | implemented                                                                                                |                                                          | yes see second sheet                                                       |
| Parra, E. Arenas, M. D. Alonso, M. Martinez, M. F. Gamen, A. Aguaron, J. <del>Quintana, M. D. P.</del>                        | 2017     | Assessing value-based health care delivery for haemodialysis                                                                                     | Spain                        | Spain                                       | multi center, retrospective                                      | 5 haemodialysis treatment centers, patients unspecified                                     | haemodialysis, renal                                                                            | Urology                                    |                                                  | partial care path                         | Direct and indirect | provider                | provider                 |                                          | Microcosting                                                  | Absorption costing - unspecified/generic |                                                        | Paper only                                                                                                 |                                                          | yes see second sheet                                                       |
| Brown, G. C. Brown, M. M. Brown, H. C. Kindermann, S. Sharma, S.                                                              | 2007     | A Value-Based Medicine Comparison of Interventions for Subfoveal Neovascular Macular Degeneration                                                | US                           | US: Pennsylvania                            |                                                                  | 233 patients with age-related macular degeneration                                          | Ophthalmology, Neovascular, macular degeneration                                                | ophthalmology                              |                                                  | partial care path                         | Direct              | payer                   | payer                    |                                          | none, reimbursements                                          | Charges/Reimbursements-based             |                                                        | N/A                                                                                                        | average medicare reimbursements                          | no                                                                         |
| Medbery, R. L. Chadd, T. S. Sweaney, J. F. Knechtle, S. J. Kooby, D. A. Maribel, S. K. <del>Lee, J. S.</del>                  | 2014     | Laparoscopic vs open right hepatectomy: A value-based analysis                                                                                   | US                           | US: Georgia                                 |                                                                  | 105 patients total, elective laparoscopic liver resection surgery or open right hepatectomy | Surgical, Hepatectomy, Laparoscopic liver resections                                            | Surgical                                   | Liver                                            | partial care path                         | Direct and indirect | provider                | provider                 |                                          | unspecified, Hospital accounting data not otherwise specified | Absorption costing - unspecified/generic |                                                        | implemented                                                                                                |                                                          | no                                                                         |
| Daniyants, N. MacKoul, P. van der Does, L. Haworth, L. Baxi, R.                                                               | 2019     | A value-based evaluation of minimally invasive hysterectomy approaches                                                                           | US                           | US: Maryland                                | single center, retrospective                                     | 2689 patients, female, 18 or over                                                           | gynecology, vaginal hysterectomy, robot, robot-assisted                                         | gynecology & obstetrics                    |                                                  | partial care path (full surgical episode) | Direct and indirect | provider                | provider                 |                                          | Microcosting                                                  | Absorption costing - unspecified/generic |                                                        | Paper only                                                                                                 |                                                          | yes see second sheet                                                       |
| Gabriel, L. Casey, J. Gee, M. Palmer, C. Sinha, J. Moxham, J. <del>Quintana, M. D. P.</del> Van Deen, W. K.                   | 2019     | Value-based healthcare analysis of joint replacement surgery for patients with primary hip osteoarthritis                                        | UK                           | UK: London                                  |                                                                  | 50 patients primary hip osteoarthritis                                                      | orthopedics, joint replacement, total hip osteoarthritis                                        | Surgical                                   | Orthopedic, arthroplasty                         | full care path                            | Direct and indirect | provider                | provider                 |                                          | Patient Level Information Costing System methodology (PLICS)  | Absorption costing - unspecified/generic |                                                        | implemented                                                                                                |                                                          | no                                                                         |
| Spiro, A. Burak Ozbay, A. Skop, M. Centeno, A. Duran, N. E. <del>Quintana, M. D. P.</del>                                     | 2017     | The impact of value-based healthcare for inflammatory bowel diseases on healthcare utilization: A pilot study                                    | US                           | US: California                              |                                                                  | 60 patients with inflammatory bowel disease                                                 | IBS, bowel, Inflammatory bowel disease                                                          | Internal Medicine                          |                                                  | full care path                            | Direct and indirect | payer                   | payer                    |                                          | none, reimbursements                                          | Charges/Reimbursements t-based           |                                                        | N/A                                                                                                        | Medicare reimbursements based on DRG/HCPCS codes         | no                                                                         |

|    |                                                                                                                                               |  |  |  |  |  |  |                                                    |                                                                                                                    |                                                                                           |                                      |                     |                                   |                                   |                     |          |                      |                                                               |                                          |                            |                                   |                      |
|----|-----------------------------------------------------------------------------------------------------------------------------------------------|--|--|--|--|--|--|----------------------------------------------------|--------------------------------------------------------------------------------------------------------------------|-------------------------------------------------------------------------------------------|--------------------------------------|---------------------|-----------------------------------|-----------------------------------|---------------------|----------|----------------------|---------------------------------------------------------------|------------------------------------------|----------------------------|-----------------------------------|----------------------|
| 1  | Isaacson, D.<br>Ahmad, T.<br>Mazzer, L.<br>Tjau, D. T.<br>Taguchi, K.<br>Usawachintachit, M.                                                  |  |  |  |  |  |  | single center, direct observation, process mapping | 10 Uteroscopes                                                                                                     | Urology, Utereroscopy                                                                     | Urology                              | partial care path   | Direct and indirect               | provider                          | provider            |          | TDABC                | Absorption costing - TDABC                                    | Paper only                               | yes see second sheet       |                                   |                      |
| 2  | Zatonskas, K.<br>Janov, M. V.<br>Zhukova, O. V.<br>Yudina, Y. S.<br>Avdonina, N. G.<br>Emelyanov, I. V.<br>Kurapnev, D. I.<br>Zastouev, A. E. |  |  |  |  |  |  |                                                    | 240 hypertensive patients                                                                                          | Blood pressure, hypertension, Blood pressure telemonitoring and remote counselling (BPTM) | Cardiology                           | partial care path   | Direct and indirect               | provider                          | provider            |          | unspecified          | Absorption costing - unspecified/generic                      | unspecified                              | no                         |                                   |                      |
| 3  | Annabathula, R.<br>Dugan, A.<br>Bhalla, V.<br>Davis, G. A.<br>Smyth, S. S.<br>Gupta, V. A.                                                    |  |  |  |  |  |  |                                                    | 634 patients, 18 or over, acute Pulmonary Embolism                                                                 | Cardiology, pulmonary embolism                                                            | Cardiology                           | unspecified         | Direct and indirect               | payer                             | payer               |          | none, reimbursements | Charges/Reimbursements-based                                  | N/A                                      | total reimbursements no    |                                   |                      |
| 4  | Coretti, G.<br>Marinari, G. M.<br>Vanni, E.<br>Ferrari, C.                                                                                    |  |  |  |  |  |  |                                                    | 2122 patients, morbidly obese, bariatric surgery                                                                   | Obesity, surgical, bariatric surgery, Morbid Obesity                                      | Surgical                             |                     |                                   | provider                          | provider            |          | unspecified          | Absorption costing - unspecified/generic                      | Paper only                               | no                         |                                   |                      |
| 5  | Konda, S. R.<br>Lott, A.<br>Egol, K. A.                                                                                                       |  |  |  |  |  |  |                                                    | 361 operative hip fracture patients                                                                                | Geriatrics, trauma, hip fracture                                                          | Surgical                             | Orthopedic fracture | partial care path                 | Direct and indirect               | provider            | provider |                      | unspecified, Hospital accounting data not otherwise specified | Absorption costing - unspecified/generic | implemented                | no                                |                      |
| 6  | Emis, R. D.<br>Parikh, A. B.<br>Sanderson, M.<br>Liu, M.<br>Isola, L.                                                                         |  |  |  |  |  |  |                                                    | 210 patients, 377 episodes of care                                                                                 | Oncology, Hematology, prostate cancer                                                     | Oncology                             | full care path      | Direct and indirect               | payer                             | payer               |          | none, reimbursements | Charges/Reimbursements-based                                  | N/A                                      | reimbursements no          |                                   |                      |
| 7  | Denneny, J. C.<br>Cyr, D. D.<br>Witsell, D. L.<br>Breerton, J.<br>Schulz, K.                                                                  |  |  |  |  |  |  |                                                    | 7499183 patients, 18-64, acute rhinosinitis                                                                        | Rhinosinitis, Typical chronic rhinosinitis                                                | Surgical                             | ENT                 | partial care path                 | Direct and indirect               | payer               | payer    |                      | none, reimbursements                                          | Charges/Reimbursements-based             | N/A                        | claims no                         |                      |
| 8  | Peele, P.<br>Keyser, D.<br>Lovelace, J.<br>Moss, D.                                                                                           |  |  |  |  |  |  |                                                    | 262 child patients, under 21.                                                                                      | Pediatrics, complex conditions                                                            | Pediatrics                           | Pediatric other     | partial care path                 | Direct and indirect               | payer               | payer    |                      | none, reimbursements                                          | Charges/Reimbursements-based             | N/A                        | reimbursements no                 |                      |
| 9  | Brown, M. M.<br>Brown, G. C.<br>Brown, H. C.<br>Pect, J.                                                                                      |  |  |  |  |  |  |                                                    | 716 patients, classic or neovascular macular degeneration                                                          | Neovascular, macular degeneration, Subfoveal Neovascular Macular Degeneration             | ophthalmology                        |                     | partial care path                 | Direct and indirect               | payer               | payer    |                      | none, reimbursements                                          | Charges/Reimbursements-based             | N/A                        | reimbursements no                 |                      |
| 10 | Burnhope, E.<br>Waring, M.<br>Guilider, A.<br>Malhotra, B.<br>Cardoso, J. M.<br>Razavi, R.<br>Ganesh, S. S.<br>Khuallar, O. V.                |  |  |  |  |  |  |                                                    | 138 patients undergoing Implantable Cardioverter Defibrillator (ICD) or Cardiac Resynchronization                  | Cardiology, heart failure                                                                 | Surgical                             | Cardiac/Thoracic    | partial care path                 | Direct and indirect               | provider            | provider |                      | unspecified, Hospital accounting data not otherwise specified | Absorption costing - unspecified/generic | implemented                | yes see second sheet              |                      |
| 11 | Jiang, R.<br>Furce, S. D.<br>Pickens, A.<br>Sanchetti, M. S.<br>Ward, K.                                                                      |  |  |  |  |  |  |                                                    | 942 patients esophagectomy 967 patients receiving primary percutaneous coronary intervention between 2009 and 2011 | Oncology, esophageal cancer                                                               | Oncology                             |                     | full care path                    | Direct and indirect               | payer               | payer    |                      | none, reimbursements                                          | Charges/Reimbursements-based             | N/A                        | Medicare costs, reimbursements no |                      |
| 12 | Ehinger, J. E.<br>Strauss, C. E.<br>Garberich, R. R.<br>Bradley, S. M.<br>Rush, P.<br>Chavez, J. J.<br>Bodnar, A. K.<br>Bodar, Y. J. L.       |  |  |  |  |  |  |                                                    | Value-based ST-segment-elevation myocardial infarction care using risk-guided triage and early discharge           | Cardiology, heart failure, myocardial infarction                                          | Surgical                             | Cardiac/Thoracic    | full care path (surgical episode) | Direct                            | provider            | provider |                      | unspecified, Hospital accounting data not otherwise specified | Unspecified                              | implemented                | no                                |                      |
| 13 | Srinivasan, A. K.<br>Shah, A. S.<br>Kawal, T.<br>Shukla, A. R.                                                                                |  |  |  |  |  |  |                                                    | single center, retrospective, direct observation                                                                   | 25 robot assisted laparoscopic pyeloplasties                                              | Pediatrics, urology, robotics, robot | Pediatrics          | Pediatric surgical                | full care path (surgical episode) | Direct and indirect | provider | provider             |                                                               | TDABC                                    | Absorption costing - TDABC | Paper only                        | yes see second sheet |
| 14 | Verberne, W. R.<br>Dijkers, J.<br>Kelder, J. C.<br>Geerts, A. B. M.<br>Jellema, W. T.<br>Vincent, H. H.<br>Van-Dalme, J. J. M.                |  |  |  |  |  |  |                                                    | 366 patients aged ≥70 years with advanced chronic kidney disease                                                   | Nephrology, kidney, dialysis, chronic                                                     | Nephrology                           |                     | full care path                    | Direct and indirect               | provider            | provider |                      | unspecified, Hospital accounting data not otherwise specified | Absorption costing - unspecified/generic | implemented                | no                                |                      |

|    |                                                                                                                                      |                                                                                                                                                                                                     |      |           |                    |                                                                                                                        |                                                         |                                                |                          |                                              |                                           |                     |          |                                                       |                                   |                                         |                                               |                                |    |
|----|--------------------------------------------------------------------------------------------------------------------------------------|-----------------------------------------------------------------------------------------------------------------------------------------------------------------------------------------------------|------|-----------|--------------------|------------------------------------------------------------------------------------------------------------------------|---------------------------------------------------------|------------------------------------------------|--------------------------|----------------------------------------------|-------------------------------------------|---------------------|----------|-------------------------------------------------------|-----------------------------------|-----------------------------------------|-----------------------------------------------|--------------------------------|----|
| 1  | Gregory, D.<br>Scotti, D. J.<br>de Lissovoy, G.<br>Palacios, I.<br>Dixon, S.<br>Main, B.<br>Zakari, W.                               | A value-based analysis of hemodynamic support strategies for high-risk heart failure patients undergoing a percutaneous coronary intervention                                                       | 2013 | US        | US; various states | 427 patients enrolled in trial, mean age 68, 80.6% male                                                                | Cardiology, heart failure                               | Surgical                                       | Cardiac/Thoracic         | partial care path                            | Direct and indirect                       | provider (proxy)    | payer    | none; charges, transformed with cost-to-charge ratio  | Charges/Reimbursement-based proxy | N/A                                     | none, charges, cost to charges                | no                             |    |
| 2  | Ravikumar, T. S.<br>Sharma, C.<br>Marini, C.<br>Steele, G. D.<br>Ritter, G.<br>Barrera, R.<br>Kiss, M.                               | A validated value-based model to improve hospital-wide perioperative outcomes: Adaptability to combined medical/surgical inpatient cohorts                                                          | 2010 | US        | US; New York       | >100,000 hospital admissions                                                                                           | Surgical                                                | Surgical                                       | other                    | partial care path                            | Direct                                    | provider            | provider | direct variable costs as an estimation of total costs | Direct costing                    | Paper only                              |                                               | no                             |    |
| 3  | Ning, M. S.<br>Venkatesan, A. M.<br>Stafford, R. J.<br>Bui, T. P.<br>Carlson, R.<br>Baillard, N. S.<br>Mason, S.                     | Developing an intraoperative 3T MRI-guided brachytherapy program within a diagnostic imaging suite: Methods, process workflow, and value-based analysis                                             | 2020 | US        | US; Texas          | single center, retrospective, direct observation, process mapping                                                      | 10 female patients<br>358 resected patients             | Oncology, Gynecology, gynecologic pelvic tumor | Oncology                 | full care path (surgical episode)            | Direct and indirect                       | provider            | provider | TDABC                                                 | Absorption costing - TDABC        | Paper only                              |                                               | yes see second sheet           |    |
| 4  | Sun, L. L.<br>Cao, D. Y.<br>Yang, J. X.<br>Bian, M. L.<br>Wei, L. H.<br>Shen, K.                                                     | Value-based medicine analysis on loop electrosurgical excision procedure and CO2 laser vaporization for the treatment of cervical intraepithelial neoplasia 2                                       | 2012 | China     | China              | 18-65, colposcopic-histopathologically confirmed CIN2, intact uterus, no past history of cervical neoplasia, and had a | Obstetrics, Gynecology, cervical neoplasia              | gynecology & obstetrics                        |                          | partial care path                            | unspecified                               | provider            | provider | unspecified                                           | Unspecified                       | unspecified                             |                                               | no                             |    |
| 5  | Fortmann, A. L.<br>Walker, C.<br>Barger, K.<br>Robacker, M.<br>Morrisey, R.<br>Ortwine, K.<br>Lawrence, J.                           | Care Team Integration in Primary Care Improves One-Year Clinical and Financial Outcomes in Diabetes: A Case for Value-Based Care                                                                    | 2020 | US        | US; California     | 236 treated patients, 239 usual care patients. All diagnosed with type 1 or 2 diabetes.                                | Diabetes                                                | Internal Medicine                              |                          | partial care path                            | Direct                                    | provider            | provider | direct variable costs as an estimation of total costs | Direct costing                    | implemented                             |                                               | no                             |    |
| 6  | Ramirez, M. M.<br>Brennan, G. P.                                                                                                     | Using the value-based care paradigm to compare physical therapy access to care models in cervical spine radiculopathy: a case report                                                                | 2020 | US        | US; Florida        | case study; 39 yo female                                                                                               | Physiotherapy                                           | Neurology                                      |                          | partial care path                            | Direct and indirect                       | payer, patient      | payer    | patient                                               | none, reimbursements              | Charges/Reimbursement-based patient OoO | N/A                                           | cost to patient, reimbursement | no |
| 7  | Ryan, S. P.<br>Plate, J. F.<br>Black, C. S.<br>Howell, C. B.<br>Jiranek, W. A.<br>Bolognesi, M. P.<br>Scotti, D. J.<br>Plate, J. F.  | Value-Based Care Has Not Resulted in Biased Patient Selection: Analysis of a Single Center's Experience in the Care for Joint Replacement Bundle                                                    | 2019 | US        | US; North Carolina | 1248 total knee arthroplasty patients,                                                                                 | orthopedics, joint replacement, total knee arthroplasty | Surgical                                       | Orthopedic, arthroplasty | full care path                               | Direct                                    | provider            | provider | direct variable costs as an estimation of total costs | Direct costing                    | implemented                             |                                               | no                             |    |
| 8  | Ryan, S. P.<br>Black, C. S.<br>Howell, C. B.<br>Jiranek, W. A.<br>Bolognesi, M. P.<br>Scotti, D. J.<br>Abbott, M. M.<br>Meara, J. G. | No Changes in Patient Selection and Value-Based Metrics for Total Hip Arthroplasty After Comprehensive Care for Joint Replacement Bundle Implementation at a Single Center                          | 2019 | US        | US; North Carolina | 751 total hip arthroplasty patients,                                                                                   | orthopedics, joint replacement, total hip arthroplasty  | Surgical                                       | Orthopedic, arthroplasty | full care path                               | Direct                                    | provider            | provider | direct variable costs as an estimation of total costs | Direct costing                    | implemented                             |                                               | no                             |    |
| 9  | Regan, D. K.<br>Manoli, A.<br>Hutzler, L.<br>Konda, S. R.<br>Egol, K. A.                                                             | A microcosting approach for isolated, unilateral cleft lip care in the first year of life                                                                                                           | 2011 | US        | US; Massachusetts  | single center, retrospective                                                                                           | 12 children, cleft lip repair                           | Pediatrics, cleft palate, plastic surgery      | Pediatrics               | Pediatric Plastic surgery                    | partial care path (full surgical episode) | Direct and indirect | provider | provider                                              | Microcosting                      | Absorption costing - ABC                | Paper only                                    | yes see second sheet           |    |
| 10 | Regan, D. K.<br>Manoli, A.<br>Hutzler, L.<br>Konda, S. R.<br>Egol, K. A.                                                             | Impact of Diabetes Mellitus on Surgical Quality Measures After Ankle Fracture Surgery: Implications for "Value-Based" Compensation and "Pay for Performance"                                        | 2015 | US        | US; New York       | 58,748 patients, 7501 with Diabetes Mellitus                                                                           | Diabetes                                                | Internal Medicine                              |                          | unspecified                                  | Direct and indirect                       | payer               | payer    | none, reimbursements                                  | Charges/Reimbursement-based       | N/A                                     | mean total hospital charges                   | no                             |    |
| 11 | Yu, Y. R.<br>Abbas, P. I.<br>Smith, C. M.<br>Carberry, K. E.<br>Ren, H.<br>Patel, B.<br>Swanson, J. G.                               | Time-driven activity-based costing: A dynamic value assessment model in pediatric appendicitis                                                                                                      | 2017 | US        | US; Texas          | single center, retrospective, direct observation, process mapping                                                      | 207 patients total, 6 phases of care                    | Pediatrics, appendicitis, simple appendicitis  | Pediatrics               | Pediatric appendicitis                       | full care path (surgical episode)         | Direct and indirect | provider | provider                                              | TDABC                             | Absorption costing - TDABC              | Paper only                                    | yes see second sheet           |    |
| 12 | Rice-Townsend, S.<br>Barnes, J. N.<br>Hall, M.<br>Baxter, J. L.<br>Rangel, S. J.                                                     | Variation in practice and resource utilization associated with the diagnosis and management of appendicitis at freestanding children's hospitals: Implications for value-based comparative analysis | 2014 | US        | US; Massachusetts  | 13,328 patients, 34 children's hospitals, 25 states in US, acute appendicitis, age 3-18                                | Pediatrics, appendicitis                                | Pediatrics                                     | Pediatric appendicitis   | unspecified                                  | Direct and indirect                       | payer               | payer    | none, reimbursements                                  | Charges/Reimbursement-based       | N/A                                     | charges transformed with cost-to-charge ratio | no                             |    |
| 13 | Ahluwalia, R.<br>Cook, J.<br>Raheman, F.<br>Karuppiyah, K.<br>Colegate-Stone, T.<br>Tavakolizadeh, A.<br>Kasheba, M.                 | Improving the efficiency of ankle fracture care through home care and day-surgery units: Delivering safe surgery on a value-based healthcare model                                                  | 2020 | UK        | UK; London         | single center, prospective, process mapping                                                                            | 53 trauma patients                                      | trauma, orthopedics, surgical, ankle fracture  | Surgical                 | Orthopedic fracture                          | full care path (surgical episode)         | Direct and indirect | provider | provider                                              | TDABC                             | Absorption costing - TDABC              | Paper only                                    | yes see second sheet           |    |
| 14 | Bisto, J. Chahal, R.<br>Riedel, B.                                                                                                   | Time-driven activity-based costing to model the utility of parallel induction redesign in high-turnover operating lists                                                                             | 2019 | Australia | Australia          | single center, prospective, process mapping                                                                            | 19 all-day surgery lists, patients unspecified          | melanoma, oncology                             | Oncology                 | partial care path (partial surgical episode) | Direct and indirect                       | provider            | provider | TDABC                                                 | Absorption costing - TDABC        | Paper only                              | yes see second sheet                          |                                |    |

|    |                                                                                                                                                                      |                                                                                                                |      |        |                    |                                              |                                                                                           |                                             |                     |                   |                                           |                     |          |                                |                                          |                                          |                                                 |                      |         |    |
|----|----------------------------------------------------------------------------------------------------------------------------------------------------------------------|----------------------------------------------------------------------------------------------------------------|------|--------|--------------------|----------------------------------------------|-------------------------------------------------------------------------------------------|---------------------------------------------|---------------------|-------------------|-------------------------------------------|---------------------|----------|--------------------------------|------------------------------------------|------------------------------------------|-------------------------------------------------|----------------------|---------|----|
| 1  | Kadakia, R. J., Ahearn, B.M., Tenenbaum, S., Bariteau, J.T.                                                                                                          | Costs Associated With Geriatric Ankle Fractures, Operative Versus Nonoperative Management                      | 2017 | US     | US, Georgia        | 19648 ankle fracture patients                | trauma, orthopedics, geriatrics, ankle fracture                                           | Surgical                                    | Orthopedic fracture | partial care path | Direct and indirect                       | payer               | payer    | none, reimbursements           | Charges/Reimbursements-based             | N/A                                      | medicare reimbursements                         | no                   |         |    |
| 2  | Barkley, R. S., Sosabower, M.J., Wang, J., Blau, S., Page, R. D.                                                                                                     | Reducing Cancer Costs Through Symptom Management and Triage Pathways                                           | 2019 | US     | US, Florida        | 10417 ER Events, 1879 unique patients        | Emergency care, Acute care, Oncology                                                      | Oncology                                    |                     | partial care path | Direct and indirect                       | payer               | payer    | none, reimbursements           | Charges/Reimbursements-based             | N/A                                      | medicare claims                                 | no                   |         |    |
| 3  | McLaughlin, N., Martin, N. A., Upadhyaya, P., Bari, A. A., Buxey, F., Wang, M. B., Hersh, E. H., Yaeger, K. A., Neifert, S. N., Kim, J., Dangayach, N. S., Weiss, N. | Assessing the cost of contemporary pituitary care                                                              | 2014 | US     | US, California     | single center, retrospective                 | 27 neurosurgical patients                                                                 | Neurosurgical, pituitary adenoma            | Surgical            | Neurosurgery      | partial care path (full surgical episode) | Direct and indirect | provider | provider                       | ABC                                      | Absorption costing - ABC                 | implemented                                     | yes see second sheet |         |    |
| 4  | Meara, J. G., Hughes, C. D., Sanchez, K., Catalozzo, L., Clark, R., Kummer, A. W.                                                                                    | Optimal Outcomes Reporting (OOR): A New Value-Based Metric for Outcome Reporting Following Cleft Palate Repair | 2020 | US     | US, Massachusetts  | Retrospective, single-center cohort analysis | 94 patients were identified who underwent primary cleft palate repair by the same surgeon | Cleft palate, Palatoplasty, plastic surgery | Surgical            | Plastic surgery   | full care path                            | Direct and indirect | provider | provider                       | Relative Value Units                     | Absorption costing - unspecified/generic | Paper only                                      | no                   |         |    |
| 5  | Jakovljevic, M., Zagic, A., Rankovic, A., Dugovic, A.                                                                                                                | Radiation therapy remains the key cost driver of oncology inpatient treatment                                  | 2015 | Serbia | Serbia             | 2544 complex oncology patients               |                                                                                           | Oncology                                    | Oncology            | partial care path | Direct                                    | provider            | provider | Microcosting direct costs only | Direct costing                           | unspecified                              | no                                              |                      |         |    |
| 6  | Sudan, R. S., He, W., Sun, C. C., Zhao, H., Rauh-Haim, J. A., Fleming, N. D., Lenzini, L., Sawczyn, G., Kim, S., Aminsharif, A., Kaouk, J.                           | Total and out-of-pocket costs of different primary management strategies in ovarian cancer                     | 2019 | US     | US, Texas          | 12761 patients                               | Gynecology, oncology, ovarian cancer                                                      | gynecology & obstetrics                     |                     | unspecified       | Direct and indirect                       | Payer, patient      | payer    | patient                        | none, reimbursements                     | Charges/Reimbursements-based             | Charges/Reimbursement-based patient OoO         | N/A                  | charges | no |
| 7  | Hemmila, M. R., Cain-Nielsen, A. H., Wahl, W. L., Vander Kolk, W. E., Jakubus, J. L., Mikhail, J. N., AlAbdour, A., Goktepe, M. E., Kilic, G. S., Borahay, M. A.     | Regional collaborative quality improvement for trauma reduces complications and costs                          | 2014 | US     | US, Texas          | 72084 episodes of acute trauma care          | Acute care                                                                                | emergency care & acute care                 |                     | partial care path | Direct and indirect                       | payer               | payer    | none, reimbursements           | Charges/Reimbursements-based             | N/A                                      | price-standardized payments, claims, DRG prices | no                   |         |    |
| 8  | Naghavi, A. O., Gonzalez, R. J., Scott, J. G., Kim, Y., Aboodeh, Y. A., Strom, T. J., Puvanesarajah, V., Kirby, D. J., Jain, A., Werner, B. C., Hassanzadeh, H.      | Staged reconstruction brachytherapy has lower overall cost in recurrent soft-tissue sarcoma                    | 2017 | US     | US, Florida        | 22 soft-tissue sarcoma patients              | Oncology, soft-tissue sarcoma                                                             | Oncology                                    |                     | full care path    | unspecified                               | payer               | payer    | none, charges                  | Charges/Reimbursements-based             | N/A                                      | charges                                         | no                   |         |    |
| 9  | Siu, A., Patel, J., Prentice, H. A., Cappuzzo, J. M., Hashemi, H., Mukherjee, D.                                                                                     | Cost Variation of Anterior Cervical Fusions in Elderly Medicare Beneficiaries                                  | 2017 | US     | US, unspecified    | 21,853 patients                              | orthopedics, geriatrics, elective anterior cervical fusions                               | Surgical                                    | Orthopedic fracture | unspecified       | Direct and indirect                       | payer               | payer    | none, reimbursements           | Charges/Reimbursements-based             | N/A                                      | reimbursements                                  | no                   |         |    |
| 10 | Kirsch, D. B., Yang, H., Maslow, A. L., Stolzenbach, M., McCall, A.                                                                                                  | A Cost Analysis of Regional Versus General Anesthesia for Carotid Endarterectomy                               | 2017 | US     | US, Virginia       | 346 patients                                 | Neurosurgery, anesthesia, carotid endarterectomy                                          | Surgical                                    | Neurosurgery        | unspecified       | direct                                    | provider            | provider | unspecified                    | Direct costing                           | implemented                              | no                                              |                      |         |    |
| 11 |                                                                                                                                                                      | Association of Positive Airway Pressure Use With Acute Care Utilization and Costs                              | 2019 | US     | US, North Carolina | 1098 patients                                | Sleep medicine, sleep apnea, Obstructive Sleep Apnea                                      | Internal Medicine                           |                     | partial care path | Direct and indirect                       | provider            | provider | unspecified                    | Absorption costing - unspecified/generic | implemented                              | no                                              |                      |         |    |

|    |                                                                                                                                                                                                                                 |      |                 |                    |                                              |                                                                                                                                               |                             |                                |                                           |                     |                  |          |                                                     |                                    |             |                                               |                      |
|----|---------------------------------------------------------------------------------------------------------------------------------------------------------------------------------------------------------------------------------|------|-----------------|--------------------|----------------------------------------------|-----------------------------------------------------------------------------------------------------------------------------------------------|-----------------------------|--------------------------------|-------------------------------------------|---------------------|------------------|----------|-----------------------------------------------------|------------------------------------|-------------|-----------------------------------------------|----------------------|
| 1  | Passias, P. G.<br>Poorman, G. W.<br>Bortz, C. A.<br>Qureshi, R.<br>Diebo, B. G.<br>Paul, J. C.<br>Lyon, S. D.                                                                                                                   | 2018 | US              | US, New York       | 2408 patients                                | orthopedic, surgical                                                                                                                          | Surgical                    | Spine                          | partial care path                         | unspecified         | payer            | payer    | none, reimbursements                                | Charges/Reimbursements-based       | N/A         | reimbursements                                | no                   |
| 2  | Monroe, G. R.<br>Frederix, G. W.<br>Savelberg, S. M. C.<br>De Vries, T. I.<br>Duran, K. J.<br>Van Der Smagt, J. J.<br>Lambert, B.                                                                                               | 2016 | The Netherlands | The Netherlands    | 17 patients                                  | Genetics, Pediatrics, Intellectual disability                                                                                                 | Pediatrics                  | Pediatric other                | full care path                            | Direct              | provider         | provider | bottom-up clinical costing approach                 | Direct costing                     | implemented |                                               | no                   |
| 3  | Manriquez, E.<br>Mandelbaum, A.<br>Aguayo, E.<br>Zakbour, M.<br>Karlan, B.<br>Benharash, P.<br>Cobian, J. G.                                                                                                                    | 2020 | US              | US, Virginia       | 21853 patients                               | Geriatrics, oncology, ovarian cancer, anterior cervical discectomy and fusion, anterior cervical fusion, cervical spine, cervical spondylosis | Oncology                    |                                | partial care path                         | Direct and indirect | payer            | payer    | none, reimbursements                                | Charges/Reimbursements-based       | N/A         | reimbursement                                 | no                   |
| 4  | Wise, K.<br>Blaschke, B. L.<br>Parikh, H. R.<br>Gorman, T.<br>Casnovsky, I.<br>McMillan, L. J.<br>Einhorn, L.                                                                                                                   | 2020 | US              | US, Minnesota      | single center, retrospective<br>287 patients | orthopedics, geriatrics, hip fracture, surgical                                                                                               | Surgical                    | Orthopedic fracture            | partial care path (full surgical episode) | Direct and indirect | provider         | provider | ABC                                                 | Absorption costing - ABC           | implemented |                                               | yes see second sheet |
| 5  | Rocque, G. B.<br>Williams, C. P.<br>Jackson, B. E.<br>Ingram, S. A.<br>Halliwole, K. I.<br>Pisu, M.<br>Schwartz, D. A.<br>Shah, A. A.<br>Zogg, C. K.<br>Nicholas, L. H.<br>Velopoulos, C. G.<br>Efron, D. T.<br>Schwartz, E. D. | 2018 | US              | US, Alabama        | 988 patients                                 | Geriatrics, oncology, De Novo Metastatic Breast Cancer                                                                                        | Oncology                    |                                | partial care path                         | Direct and indirect | payer            | payer    | none, reimbursements                                | Charges/Reimbursements-based       | N/A         | reimbursement                                 | no                   |
| 6  | Operative delay to laparoscopic cholecystectomy: Racking up the cost of health care                                                                                                                                             | 2015 | US              | US, Massachusetts  | 191032 patient records                       | Surgical, acute care, acute cholecystitis, laparoscopic cholecystectomy                                                                       | Surgical                    | Gallbladder                    | unspecified                               | Direct and indirect | provider (proxy) | payer    | none; charges transformed with cost-to-charge ratio | Charges/Reimbursements-based proxy | N/A         | charges transformed with cost-to-charge ratio | no                   |
| 7  | Brixner, D.<br>Rubin, D. T.<br>Mease, P.<br>Mittal, M.<br>Liu, H.<br>Davis, M.<br>Cassendi, A.                                                                                                                                  | 2019 | US              | US, various states | 1134 patients                                | Multiple                                                                                                                                      | multiple                    |                                | unspecified                               | Direct and indirect | payer            | payer    | none; charges                                       | Charges/Reimbursements-based       | N/A         | charges                                       | no                   |
| 8  | Aguayo, E.<br>Santha, Y.<br>Seo, Y. J.<br>Mardock, A.<br>Bailey, K.<br>Dobaria, V.<br>Kishore, S.<br>Cronin, K. J.<br>Mair, S. D.                                                                                               | 2018 | US              | US, California     | 13943 patients                               | Cardiology, surgical, thrombocytopenia, Heparin-induced thrombocytopenia                                                                      | Surgical                    | Cardiac/Thoracic               | unspecified                               | Direct and indirect | payer            | payer    | none; charges transformed with cost-to-charge ratio | Charges/Reimbursements-based proxy | N/A         | charges transformed with cost-to-charge ratio | no                   |
| 9  | Hawk, G. S.<br>Thompson, K. L.<br>Hettrich, C. M.<br>Jacobs, C. A.                                                                                                                                                              | 2020 | US              | US, Kentucky       | 170329 patients                              | orthopedic, surgical, depression, Rotator Cuff Repair                                                                                         | Surgical                    | Orthopedic rotator cuff repair | partial care path                         | Direct and indirect | payer            | payer    | none; charges                                       | Charges/Reimbursements-based       | N/A         | charges                                       | no                   |
| 10 | Alli, V. V.<br>Zhang, J.<br>Telem, D. A.                                                                                                                                                                                        | 2018 | US              | US, Texas          | 14290 patients                               | Surgical, hernia, Incisional hernia                                                                                                           | Surgical                    | Abdominal                      | full care path                            | Direct and indirect | payer            | payer    | none; charges                                       | Charges/Reimbursements-based       | N/A         | charges                                       | no                   |
| 11 | Robles, A. J.<br>Komblioth, L. Z.<br>Hendrickson, C. M.<br>Howard, B. M.<br>Conroy, A. S.<br>Moazed, F.<br>Lafont, C. E.                                                                                                        | 2018 | US              | US, California     | 1552 patients                                | Acute care, trauma care                                                                                                                       | emergency care & acute care |                                | unspecified                               | Direct and indirect | payer            | payer    | none; charges                                       | Charges/Reimbursements-based       | N/A         | charges                                       | no                   |
| 12 | van Dijk, J. T. J. M.<br>van Essen, T. A.<br>Dijkman, M. D.<br>Mostert, C. Q. B.<br>Polinder, S.<br>Peul, W. C.<br>Lambert, C. W.<br>Thakore, R. V.<br>Greenberg, S. E.                                                         | 2019 | The Netherlands | The Netherlands    | 108 patients                                 | Acute care, brain injury, acute subdural hematoma, trauma care                                                                                | emergency care & acute care |                                | partial care path                         | Direct and indirect | provider         | provider | Absorption costing - reference pricing              | unspecified/generic                | Paper only  |                                               | no                   |
| 13 | Shi, H.<br>Fox, A. M.<br>Francois, E. L.<br>Prabek, M. A.<br>Khanlou, S. K.<br>Smith, B. D.<br>Jiang, J.<br>Shih, Y. C.<br>Giordano, S. H.<br>Huo, J.<br>Jaggi, R.<br>Monosh, A. G.                                             | 2015 | US              | US, Tennessee      | 78 patients                                  | orthopedic, surgical                                                                                                                          | Surgical                    | Orthopedic                     | unspecified                               | Direct and indirect | payer            | payer    | none; charges                                       | Charges/Reimbursements-based       | N/A         | charges                                       | no                   |
| 14 | Cost and complications of local therapies for early-stage breast cancer                                                                                                                                                         | 2017 | US              | US, Texas          | 105 211 female patients                      | Oncology, breast cancer                                                                                                                       | Oncology                    |                                | partial care path                         | Direct and indirect | payer            | payer    | none; charges                                       | Charges/Reimbursements-based       | N/A         | charges                                       | no                   |

|    |                                                                                                                                                                                                               |                                                                                                                                                                           |      |    |                    |                                                              |                                                                        |               |                                      |                                   |                     |                  |                      |                                                               |                                          |                      |                                                      |
|----|---------------------------------------------------------------------------------------------------------------------------------------------------------------------------------------------------------------|---------------------------------------------------------------------------------------------------------------------------------------------------------------------------|------|----|--------------------|--------------------------------------------------------------|------------------------------------------------------------------------|---------------|--------------------------------------|-----------------------------------|---------------------|------------------|----------------------|---------------------------------------------------------------|------------------------------------------|----------------------|------------------------------------------------------|
| 1  | Lentz, T. A.<br>Rhon, D. I.<br>George, S. Z.                                                                                                                                                                  | Predicting Opioid Use, Increased Health Care Utilization and High Costs for Musculoskeletal Pain: What Factors Mediate Pain Intensity and Disability?                     | 2020 | US | US, Washington     | 283 patients                                                 | Pain, Musculoskeletal Pain                                             | Pain medicine | partial care path                    | Direct and indirect               | provider            | provider         | unspecified          | Absorption costing - unspecified/generic                      | unspecified                              | no                   |                                                      |
| 2  | Kaul, S.<br>Korgenski, E. K.<br>Ying, J.<br>Ng, C. F.<br>Smits-Szemmann, R. R.<br>Nelson, R. E.<br>Arias-Solis, S.<br>Silva-Velazco, J.                                                                       | A retrospective analysis of treatment-related hospitalization costs of pediatric, adolescent, and young adult acute lymphoblastic leukemia                                | 2016 | US | US, Utah           | single center, retrospective<br>505 patients                 | Oncology, leukemia, acute lymphoblastic leukemia                       | Pediatrics    | Pediatric Oncology                   | partial care path                 | Direct and indirect | provider         | provider             | ABC                                                           | Absorption costing - ABC                 | implemented          | no                                                   |
| 3  | Dietz, D. W.<br>Stocchi, L.<br>Costedio, M.<br>Gorgan, E.<br>Kalady, M. F.<br>Kassler, J.<br>Cunhares, M. F.<br>Feldman, L.<br>Miller, P. E.<br>Waters, P. M.<br>Bae, D. S.                                   | Considering Value in Rectal Cancer Surgery: An Analysis of Costs and Outcomes Based on the Open, Laparoscopic, and Robotic Approach for Proctectomy                       | 2017 | US | US, Ohio           | 488 patients                                                 | Oncology, rectal cancer                                                | Oncology      | partial care path (surgical episode) | Direct and indirect               | provider            | provider         | unspecified          | Absorption costing - unspecified/generic                      | unspecified                              | no                   |                                                      |
| 4  | Vuong, B.<br>Dehal, A.<br>Uppal, A.<br>Stern, S. L.<br>Mejia, J.<br>Weerasinghe, R.<br>Sanaia, Y.<br>Mantha, A.<br>Zaician, B.<br>Juo, Y. Y.<br>Shemin, R. J.<br>Benharash, P.                                | Complications and Cost of Syndactyly Reconstruction in the United States: Analysis of the Pediatric Health Information System                                             | 2017 | US | US, Massachusetts  | 38 hospitals, 2047 procedures                                | Pediatrics, orthopedic, surgical, Syndactyly Reconstruction            | Pediatrics    | Pediatric surgical                   | partial care path                 | Direct and indirect | provider (proxy) | payer                | none, charges, transformed with cost-to-charge ratio          | Charges/Reimbursements-based proxy       | N/A                  | charges transformed with cost-to-charge ratio<br>no  |
| 5  | Chatfield, S. C.<br>Volpicelli, F. M.<br>Adler, N. M.<br>Kim, K. L.<br>Jones, S. A.<br>Francois, F.<br>Chawla, S. S.<br>Whitson, A. J.<br>Schiffman, C. J.<br>Matsen, F. A.<br>Hsu, J. E.                     | What Are the Most Significant Cost and Value Drivers for Pancreatic Resection in an Integrated Healthcare System?                                                         | 2018 | US | US, California     | 796 patients                                                 | Surgical, Pancreas, Pancreatic Resection                               | Surgical      | Endocrine                            | partial care path                 | Direct and indirect | provider         | provider             | unspecified                                                   | Absorption costing - unspecified/generic | unspecified          | no                                                   |
| 6  | Charfield, S. C.<br>Volpicelli, F. M.<br>Adler, N. M.<br>Kim, K. L.<br>Jones, S. A.<br>Francois, F.<br>Chawla, S. S.<br>Whitson, A. J.<br>Schiffman, C. J.<br>Matsen, F. A.<br>Hsu, J. E.                     | Trends in Readmission and Costs After Transcatheter Implantation Versus Surgical Aortic Valve Replacement in Patients With Renal Dysfunction                              | 2020 | US | US, LA             | 350,609 isolated aortic valve replacements                   | Cardiology, Renal, Aortic Repair, Thoracic Endovascular Aortic Repair  | Surgical      | Cardiac/Thoracic                     | partial care path                 | Direct and indirect | provider (proxy) | payer                | none, charges, transformed with cost-to-charge ratio          | Charges/Reimbursements-based proxy       | N/A                  | charges transformed with cost-to-charge ratio<br>no  |
| 7  | Chatfield, S. C.<br>Volpicelli, F. M.<br>Adler, N. M.<br>Kim, K. L.<br>Jones, S. A.<br>Francois, F.<br>Chawla, S. S.<br>Whitson, A. J.<br>Schiffman, C. J.<br>Matsen, F. A.<br>Hsu, J. E.                     | Bending the cost curve: time series analysis of a value transformation programme at an academic medical centre                                                            | 2019 | US | US, New York       | single center, retrospective<br>74 projects, 160434 patients | Multiple                                                               | multiple      | partial care path                    | Direct                            | provider            | provider         | ABC                  | Direct costing                                                | implemented                              | yes see second sheet |                                                      |
| 8  | Klink, A. J.<br>Chmielowski, B.<br>Feinberg, B.<br>Ahsan, S.<br>Nero, D.<br>Liu, F. X.                                                                                                                        | Drivers of lower inpatient hospital costs and greater improvements in health-related quality of life for patients undergoing total shoulder and ream-and-run arthroplasty | 2020 | US | US, Washington     | 433 patients                                                 | orthopedics, athroplasty, total shoulder and ream-and-run arthroplasty | Surgical      | Orthopedic, arthroplasty             | unspecified                       | Direct and indirect | provider         | provider             | unspecified, Hospital accounting data not otherwise specified | Absorption costing - unspecified/generic | implemented          | no                                                   |
| 9  | Klink, A. J.<br>Chmielowski, B.<br>Feinberg, B.<br>Ahsan, S.<br>Nero, D.<br>Liu, F. X.                                                                                                                        | Health Care Resource Utilization and Costs in First-Line Treatments for Patients with Metastatic Melanoma in the United States                                            | 2019 | US | US, various states | 1599 patients                                                | Oncology, melanoma                                                     | Oncology      | unspecified                          | Direct and indirect               | payer               | payer            | none, reimbursements | Charges/Reimbursements-based                                  | N/A                                      | claims<br>no         |                                                      |
| 10 | Chotali, S.<br>Sivaganesan, A.<br>Parker, S. L.<br>Sielatycki, J. A.<br>McGirt, M. J.<br>Devlin, C. J.                                                                                                        | Drivers of Variability in 90-Day Cost for Elective Anterior Cervical Discectomy and Fusion for Cervical Degenerative Disease                                              | 2018 | US | US, Tennessee      | 445 patients                                                 | Spine, cervical degenerative disease                                   | Surgical      | Spine                                | partial care path                 | Direct and indirect | payer            | payer                | none, reimbursements                                          | Charges/Reimbursements-based             | N/A                  | reimbursements<br>no                                 |
| 11 | Sanaia, Y.<br>Kaviampour, B.<br>Downey, P.<br>Morchi, R.<br>Shemin, R. J.<br>Benharash, P.                                                                                                                    | National Study of Index and Readmission Mortality and Costs for Thoracic Endovascular Aortic Repair in Patients With Renal Disease                                        | 2020 | US | US, California     | 121046 patients                                              | Cardiology, Surgical, Aortic repair, Renal Disease                     | Surgical      | Cardiac/Thoracic                     | unspecified                       | Direct and indirect | provider (proxy) | payer                | none, charges, transformed with cost-to-charge ratio          | Charges/Reimbursements-based proxy       | N/A                  | charges, transformed with cost-to-charge ratio<br>no |
| 12 | Jain, N.<br>Brock, J. L.<br>Phillips, F. M.<br>Weaver, T.<br>Khan, S. N.                                                                                                                                      | Chronic preoperative opioid use is a risk factor for increased complications, resource use, and costs after cervical fusion                                               | 2018 | US | US, various states | 29101 patients                                               | Spine, cervical degenerative disease                                   | Surgical      | Spine                                | partial care path                 | Direct and indirect | payer            | payer                | none, reimbursements                                          | Charges/Reimbursements-based             | N/A                  | charges<br>no                                        |
| 13 | Featherall, J.<br>Brigati, D. P.<br>Atney, A. N.<br>Fatur, M.<br>Bokar, D. V.<br>Murray, T. G.<br>Mullins, R. M.<br>Ackerman, R. S.<br>Hirschi, M.<br>Alford, B.<br>Evans, T.<br>Kiluk, J. V.<br>Patel, S. Y. | Effects of a Total Knee Arthroplasty Care Pathway on Cost, Quality, and Patient Experience: Toward Measuring the Triple Aim                                               | 2019 | US | US, Ohio           | 6760 surgeries                                               | orthopedics, total knee arthroplasty                                   | Surgical      | Orthopedic, arthroplasty             | full care path (surgical episode) | Direct              | provider         | provider             | Relative Value Unit costing                                   | Direct costing                           | implemented          | yes see second sheet                                 |
| 14 | Featherall, J.<br>Brigati, D. P.<br>Atney, A. N.<br>Fatur, M.<br>Bokar, D. V.<br>Murray, T. G.<br>Mullins, R. M.<br>Ackerman, R. S.<br>Hirschi, M.<br>Alford, B.<br>Evans, T.<br>Kiluk, J. V.<br>Patel, S. Y. | Enhanced REVENUE After Surgery? A Cost-Standardized Enhanced Recovery Pathway for Mastectomy Decreases Length of Stay                                                     | 2019 | US | US, unspecified    | 103 patients                                                 | Oncology, mastectomy                                                   | Oncology      | unspecified                          | Direct and indirect               | payer               | payer            | none, charges        | Charges/Reimbursements-based                                  | N/A                                      | charges<br>no        |                                                      |

|                                                                                                                                                                                                        |      |    |                    |                 |                                                                    |                             |                          |                                           |                     |                  |                 |                                                               |                                          |                                          |                                                |                      |    |
|--------------------------------------------------------------------------------------------------------------------------------------------------------------------------------------------------------|------|----|--------------------|-----------------|--------------------------------------------------------------------|-----------------------------|--------------------------|-------------------------------------------|---------------------|------------------|-----------------|---------------------------------------------------------------|------------------------------------------|------------------------------------------|------------------------------------------------|----------------------|----|
| Williams, S. B.<br>Shan, Y.<br>Jazzar, U.<br>Mehra, H. B.<br>Baillargoon, J. G.<br>Huo, J.<br>Somasundara, A. J.<br>Schilling, P. L.<br>He, J.<br>Chen, S.<br>Placzek, H.<br>Bini, S. A.               | 2018 | US | US; various states | 3200 patients   | Oncology, urology, surgical, bladder cancer                        | Oncology                    |                          | partial care path                         | Direct and indirect | payer            | payer           | none, reimbursements                                          | Charges/Reimbursements-based             | N/A                                      | charges                                        | no                   |    |
| Lott, A.<br>Haglin, J.<br>Saleh, H.<br>Hall, J.<br>Egol, K. A.<br>Konda, S. R.                                                                                                                         | 2018 | US | US; various states | 1486 patients   | Acute care, geriatrics, Emergency care                             | emergency care & acute care |                          | partial care path                         | Direct              | provider         | provider        | unspecified; Hospital accounting data not otherwise specified | Direct costing                           | implemented                              |                                                | no                   |    |
| Ackerman, S. J.<br>Knight, T.<br>Wahl, P. M.<br>Cartwright, C. P.                                                                                                                                      | 2019 | US | US; various states | 313145 patients | Gynecology, obstetrics, vulvovaginitis                             | gynecology & obstetrics     |                          | unspecified                               | Direct and indirect | payer            | payer           | none, reimbursements                                          | Charges/Reimbursements-based             | N/A                                      | charges                                        | no                   |    |
| Peard, L.<br>Goodwin, J.<br>Hensley, P.<br>Dugan, A.<br>Bylund, J.<br>Harris, A. M.                                                                                                                    | 2019 | US | US; Kentucky       | 275 patients    | Surgical, robot, Robot-Assisted Laparoscopic Radical Prostatectomy | Surgical                    | Prostatectomy            | partial care path                         | Direct and indirect | provider         | provider        | unspecified; Hospital accounting data not otherwise specified | Absorption costing - unspecified generic | implemented                              |                                                | no                   |    |
| Patel, M. I.<br>Ramirez, D.<br>Agajanian, R.<br>Agajanian, H.<br>Bhattacharya, J.<br>Bundorf, K. M.                                                                                                    | 2020 | US | US; California     | 425 enrollees   | Oncology                                                           | Oncology                    |                          | partial care path                         | Direct and indirect | payer            | payer           | none, reimbursements                                          | Charges/Reimbursements-based             | N/A                                      | charges                                        | no                   |    |
| Harris, A. M.<br>Hensley, P.<br>Goodwin, J.<br>Dugan, A.<br>Peard, L.<br>Bell, J. R.<br>Stearns, L. J.<br>Narang, S.<br>Albright, R. E.<br>Hammond, K.<br>Xia, Y.<br>Richter, H. B.<br>McCreary, D. L. | 2019 | US | US; Kentucky       | 215 patients    | Urology, surgical, Nephrectomy                                     | Surgical                    | kidney                   | partial care path                         | Direct and indirect | provider         | provider        | unspecified; Hospital accounting data not otherwise specified | Absorption costing - unspecified generic | implemented                              |                                                | no                   |    |
| Dugarte, A. J.<br>Vang, S.<br>Pflowman, B.<br>Williams, B. R.<br>Parikh, H. R.                                                                                                                         | 2019 | US | US; Minnesota      | 67 patients     | orthopedics                                                        | Surgical                    | Orthopedic fracture      | partial care path (full surgical episode) | Direct and indirect | provider         | provider        | TDABC                                                         | Absorption costing - TDABC               | Paper only                               |                                                | yes see second sheet |    |
| Yamasaki, A.<br>Callans, K. M.<br>Shah, M.<br>Kaplan, R. S.<br>Hartnick, C.                                                                                                                            | 2020 | US | US; Massachusetts  | 10 patients     | Neonatal, pediatrics, tracheostomy, surgical                       | Pediatrics                  | Pediatric Neonatal       | partial care path                         | Direct and indirect | provider         | provider        | TDABC                                                         | Absorption costing - TDABC               | Paper only                               |                                                | yes see second sheet |    |
| Navarro, S. M.<br>Wang, E. Y.<br>Haeblerle, H. S.<br>Mont, M. A.<br>Krebs, V. E.<br>Patterson, B. M.<br>Skell, N. J.<br>Butler, J.<br>O'Brien, D. C.<br>Kays, J. K.<br>Kubal, C.<br>Liangpunskul, S.   | 2018 | US | US; New York       | 141446 patients | orthopedics, total knee arthroplasty                               | Surgical                    | Orthopedic, arthroplasty | partial care path (surgical episode)      | Direct and indirect | provider (proxy) | payer           | none; charges, transformed with cost-to-charge ratio          | Charges/Reimbursements-based proxy       | N/A                                      | charges, transformed with cost-to-charge ratio | no                   |    |
| Robinson, Jamie R.<br>Avritscher, Elenir B. C.<br>Gay, James C.<br>Willis, Zachary I.<br>Putnam, Luke R.<br>Anglemeyer, Andrew<br>Labovitz, J. M.<br>Kominiski, G. F.                                  | 2019 | US | US; Indiana        | 44 patients     | Oncology, renal                                                    | Oncology                    |                          | partial care path                         | Direct and indirect | provider (proxy) | payer           | none; charges                                                 | Charges/Reimbursements-based             | N/A                                      | charges                                        | no                   |    |
| Gay, James C.<br>Willis, Zachary I.<br>Putnam, Luke R.<br>Anglemeyer, Andrew<br>Labovitz, J. M.<br>Kominiski, G. F.                                                                                    | 2017 | US | US; Tennessee      | 313 patients    | Appendicitis, Pediatrics                                           | Pediatrics                  | Pediatric appendicitis   | partial care path (surgical episode)      | Direct and indirect | provider, payer  | provider, payer | none; charges, transformed with cost-to-charge ratio          | Charges/Reimbursements-based proxy       | Absorption costing - unspecified generic | N/A                                            | charges              | no |
|                                                                                                                                                                                                        | 2016 | US | US; California     | unspecified     | Diabetes                                                           | Internal Medicine           |                          | unspecified                               | Direct and indirect | provider (proxy) | payer           | none; charges, transformed with cost-to-charge ratio          | Charges/Reimbursements-based proxy       | N/A                                      | charges, transformed with cost-to-charge ratio | no                   |    |



|                                                                                                                                                                                                                                                                                                                                                                                                                                                                                                                                                                                                                                                                  |                                                                                                     |         |                    |                                      |                                                                     |                                                              |                          |                                      |                     |                     |                  |                                                               |                                                      |                                    |                                                |                                                |    |
|------------------------------------------------------------------------------------------------------------------------------------------------------------------------------------------------------------------------------------------------------------------------------------------------------------------------------------------------------------------------------------------------------------------------------------------------------------------------------------------------------------------------------------------------------------------------------------------------------------------------------------------------------------------|-----------------------------------------------------------------------------------------------------|---------|--------------------|--------------------------------------|---------------------------------------------------------------------|--------------------------------------------------------------|--------------------------|--------------------------------------|---------------------|---------------------|------------------|---------------------------------------------------------------|------------------------------------------------------|------------------------------------|------------------------------------------------|------------------------------------------------|----|
| Johnson, J. T.<br>Scholtens, D. M.<br>Kuang, A.<br>Feng, X. Y.<br>Elaysh, O. M.<br>Post, L. A.<br>Marano, D. S.<br>Kamata, J. M.<br>Navarro, S. M.<br>Haeberle, H. S.<br>Helm, J. M.<br>Kamath, A. F.<br>Schaffler, J. L.<br>Krauss, A. T.<br>Saifi, C.<br>Cazzulino, A.<br>Park, C.<br>Laratta, J.<br>Louie, P. K.<br>Shillingford, J. N.<br>Lehman, R.<br>Ning, M. S.<br>Palmer, M. B.<br>Shah, A. K.<br>Chambers, L. C.<br>Garlock, L. B.<br>Melson, B. B.<br>Krauss, A. T.<br>Mukdad, L.<br>Mantha, A.<br>Aguiayo, E.<br>Samaha, Y.<br>Jao, Y. Y.<br>Zaicain, B.<br>Frankel, W. C.<br>Navarro, S. M.<br>Haeberle, H. S.<br>Ramanathan, D.<br>Ramkumar, P. N. | Does value vary by center surgical volume for neonates with truncus arteriosus? A multicenter study | 2020    | US                 | US; various states                   | 1024 neonates                                                       | Neonatal, pediatrics, surgical, cardiology, thoracic surgery | Pediatrics               | Pediatric Neonatal                   | full care path      | Direct and indirect | provider (proxy) | payer                                                         | none; charges, transformed with cost-to-charge ratio | Charges/Reimbursements-based proxy | N/A                                            | charges, transformed with cost-to-charge ratio | no |
| Predicting Inpatient Payments Prior to Lower Extremity Arthroplasty Using Deep Learning: Which Model Architecture Is Best?                                                                                                                                                                                                                                                                                                                                                                                                                                                                                                                                       | 2019                                                                                                | US      | US; New York       | 295605 patients                      | orthopedics, total hip arthroplasty, total knee arthroplasty        | Surgical                                                     | Orthopedic, arthroplasty | full care path                       | Direct and indirect | payer               | payer            | none, reimbursements                                          | Charges/Reimbursements-based                         | N/A                                | payment, cost to payor                         | no                                             |    |
| National Trends for Primary and Revision Lumbar Disc Arthroplasty Throughout the United States                                                                                                                                                                                                                                                                                                                                                                                                                                                                                                                                                                   | 2018                                                                                                | US      | US; various states | 12957 patients                       | Arthroplasty                                                        | Surgical                                                     | Orthopedic, arthroplasty | unspecified                          | Direct and indirect | provider (proxy)    | payer            | none; charges, transformed with cost-to-charge ratio          | Charges/Reimbursements-based proxy                   | N/A                                | charges, transformed with cost-to-charge ratio | no                                             |    |
| Three-year results of a prospective statewide insurance coverage pilot for proton therapy: Stakeholder collaboration improves patient access to care                                                                                                                                                                                                                                                                                                                                                                                                                                                                                                             | 2020                                                                                                | US      | US; Texas          | 32 patients                          | Oncology                                                            | Oncology                                                     |                          | partial care path                    | Direct and indirect | payer               | payer            | none; charges                                                 | Charges/Reimbursements-based                         | N/A                                | charges                                        | no                                             |    |
| Readmission and resource utilization after orthopedic heart transplant versus ventricular assist device in the National Readmissions Database, 2010-2014                                                                                                                                                                                                                                                                                                                                                                                                                                                                                                         | 2018                                                                                                | US      | US; California     | 12111 patients                       | Thoracic surgery, Cardiology, heart failure, heart transplant, VADs | Surgical                                                     | Cardiac/Thoracic         | unspecified                          | Direct and indirect | provider (proxy)    | payer            | none; charges, transformed with cost-to-charge ratio          | Charges/Reimbursements-based proxy                   | N/A                                | charges, transformed with cost-to-charge ratio | no                                             |    |
| Optimizing the Volume-Value Relationship in Laminectomy: An Evidence-Based Analysis of Outcomes and Economics of Scale                                                                                                                                                                                                                                                                                                                                                                                                                                                                                                                                           | 2019                                                                                                | US      | US; New York       | 67758 patients                       | orthopedic, laminectomy, surgical                                   | Surgical                                                     | Spine                    | unspecified                          | Direct and indirect | provider (proxy)    | payer            | none; charges, transformed with cost-to-charge ratio          | Charges/Reimbursements-based proxy                   | N/A                                | charges, transformed with cost-to-charge ratio | no                                             |    |
| Resource Utilization for Initial Hospitalization in Pediatric Heart Transplantation in the United States                                                                                                                                                                                                                                                                                                                                                                                                                                                                                                                                                         | 2018                                                                                                | US      | US; Pennsylvania   | 1629 patients                        | Pediatrics, cardiology                                              | Pediatrics                                                   | Pediatric surgical       | unspecified                          | Direct and indirect | provider (proxy)    | payer            | none; charges, transformed with cost-to-charge ratio          | Charges/Reimbursements-based proxy                   | N/A                                | charges, transformed with cost-to-charge ratio | no                                             |    |
| Opioid-free colorectal surgery: a method to improve patient & financial outcomes in surgery                                                                                                                                                                                                                                                                                                                                                                                                                                                                                                                                                                      | 2019                                                                                                | US      | US; various states | 50098 cases                          | Surgical, Laparoscopic colorectal surgery                           | Surgical                                                     | Colon/Rectal             | unspecified                          | Direct and indirect | payer               | payer            | none; charges                                                 | Charges/Reimbursements-based                         | N/A                                | charges                                        | no                                             |    |
| Creating a Value Dashboard for orthopedic Surgical Procedures                                                                                                                                                                                                                                                                                                                                                                                                                                                                                                                                                                                                    | 2020                                                                                                | Lebanon | Lebanon            | 6 surgeons' data                     | Orthopedics, total knee arthroplasty, total hip arthroplasty        | Surgical                                                     | Orthopedic, arthroplasty | unspecified                          | Direct              | provider            | provider         | unspecified, Hospital accounting data not otherwise specified | Direct costing                                       | implemented                        |                                                | no                                             |    |
| National Trends in Healthcare-Associated Infections for Five Common Cardiovascular Conditions                                                                                                                                                                                                                                                                                                                                                                                                                                                                                                                                                                    | 2019                                                                                                | US      | US; various states | 1788982 hospitalizations             | Cardiology, cardiovascular                                          | Cardiology                                                   |                          | unspecified                          | Direct and indirect | provider (proxy)    | payer            | none; charges, transformed with cost-to-charge ratio          | Charges/Reimbursements-based proxy                   | N/A                                | charges, transformed with cost-to-charge ratio | no                                             |    |
| The coming hip and femur fracture bundle: A new inpatient risk stratification tool for care providers                                                                                                                                                                                                                                                                                                                                                                                                                                                                                                                                                            | 2018                                                                                                | US      | US; New York       | 173 patients                         | Orthopedics, Geriatrics, total hip arthroplasty                     | Surgical                                                     | Orthopedic, arthroplasty | partial care path                    | Direct              | provider            | provider         | unspecified, Hospital accounting data not otherwise specified | Direct costing                                       | implemented                        |                                                | no                                             |    |
| A Surgeon Scorecard Is Associated with Improved Value in Elective Primary Hip and Knee Arthroplasty                                                                                                                                                                                                                                                                                                                                                                                                                                                                                                                                                              | 2019                                                                                                | US      | US; Texas          | 470 patients                         | Surgical, total hip arthroplasty, knee arthroplasty                 | Surgical                                                     | Orthopedic, arthroplasty | partial care path                    | Direct and indirect | provider            | provider         | unspecified, Hospital accounting data not otherwise specified | Absorption costing - unspecified/generic             | implemented                        |                                                | no                                             |    |
| Where Are the Opportunities for Reducing Health Care Spending Within Alternative Payment Models?                                                                                                                                                                                                                                                                                                                                                                                                                                                                                                                                                                 | 2017                                                                                                | US      | US; Alabama        | 3427 patients from 12 cancer centers | Oncology                                                            | Oncology                                                     |                          | partial care path                    | Direct and indirect | payer               | payer            | none, reimbursements                                          | Charges/Reimbursements-based                         | N/A                                | reimbursements                                 | no                                             |    |
| Utilization of Interspinous Devices Throughout the United States Over a Recent Decade: An Analysis of the Nationwide Inpatient Sample                                                                                                                                                                                                                                                                                                                                                                                                                                                                                                                            | 2018                                                                                                | US      | US; various states | 14225 patients                       | Surgical, spine                                                     | Surgical                                                     | Spine                    | partial care path (surgical episode) | Direct and indirect | provider (proxy)    | payer            | none; charges, transformed with cost-to-charge ratio          | Charges/Reimbursements-based proxy                   | N/A                                | charges, transformed with cost-to-charge ratio | no                                             |    |
| Can a machine learning model accurately predict patient resource utilization following lumbar spinal fusion?                                                                                                                                                                                                                                                                                                                                                                                                                                                                                                                                                     | 2020                                                                                                | US      | US; various states | 38070 patients                       | Spine, lumbar spinal fusion                                         | Surgical                                                     | Spine                    | unspecified                          | Direct and indirect | provider (proxy)    | payer            | none; charges, transformed with cost-to-charge ratio          | Charges/Reimbursements-based proxy                   | N/A                                | charges, transformed with cost-to-charge ratio | no                                             |    |

|    |                                                                                                                       |                                                                                                                                                                                   |      |    |                    |                                                                                          |                                                                                                            |                   |                          |                                           |                     |                  |          |                                                      |                                          |             |                                                                    |                      |
|----|-----------------------------------------------------------------------------------------------------------------------|-----------------------------------------------------------------------------------------------------------------------------------------------------------------------------------|------|----|--------------------|------------------------------------------------------------------------------------------|------------------------------------------------------------------------------------------------------------|-------------------|--------------------------|-------------------------------------------|---------------------|------------------|----------|------------------------------------------------------|------------------------------------------|-------------|--------------------------------------------------------------------|----------------------|
| 1  | Karmuta, J. M.<br>Navarro, S. M.<br>Hachberle, H. S.<br>Billow, D. G.<br>Krebs, V. E.<br>Rankumar, P. N.              | Bundled Care for Hip Fractures: A Machine-Learning Approach to an Untenable Patient-Specific Payment Model                                                                        | 2019 | US | US, New York       | 9856 patients                                                                            | orthopedics, hip fracture, trauma                                                                          | Surgical          | Orthopedic fracture      | partial care path                         | Direct and indirect | provider (proxy) | payer    | none; estimation, cost-to-charge ratio, SPARCS data  | Charges/Reimbursements-based proxy       | N/A         | charges, transformed with cost-to-charge ratio                     | no                   |
| 2  | Cicemins, M.<br>Vollstsky, S.<br>McCann, G.<br>Mancini, M.<br>Sanzari, L.<br>Yannopoulos, A.                          | Considering healthcare value and associated risk factors with postoperative urinary retention after elective laminectomy                                                          | 2020 | US | US, Connecticut    | 433 patients                                                                             | surgical, elective laminectomy                                                                             | Surgical          | Spine                    | partial care path                         | Direct              | provider         | provider | direct costs                                         | Direct costing                           | unspecified |                                                                    | no                   |
| 3  | Navarro, S. M.<br>Rankumar, P. N.<br>Egger, A. C.<br>Goodwin, R. C.                                                   | Evidence-Based Thresholds for the Volume-Value Relationship in Adolescent Idiopathic Scoliosis: Outcomes and Economics of Scale                                                   | 2018 | US | US, New York       | 3224 patients                                                                            | Orthopedic, Pediatrics, Adolescent Idiopathic Scoliosis                                                    | Pediatrics        | Pediatric other          | partial care path                         | Direct and indirect | provider (proxy) | payer    | none; estimation, cost-to-charge ratio, SPARCS data  | Charges/Reimbursements-based proxy       | N/A         | charges, transformed with cost-to-charge ratio                     | no                   |
| 4  | Batoni, S. B.<br>Gingrich, A. A.<br>Hoch, J. S.<br>Canter, R. J.<br>Bold, R. J.                                       | Defining Value for Pancreatic Surgery in Early-Stage Pancreatic Cancer                                                                                                            | 2019 | US | US, California     | 2786 patients, 157 hospitals                                                             | Oncology, pancreatic cancer                                                                                | Oncology          |                          | unspecified                               | Direct and indirect | provider (proxy) | payer    | none; charges, transformed with cost-to-charge ratio | Charges/Reimbursements-based proxy       | N/A         | charges, transformed with cost-to-charge ratio                     | no                   |
| 5  | Xiao, R.<br>Miller, J. A.<br>Zafra, W. J.<br>Goretski, E. Z.<br>Young, J. B.                                          | Impact of Home Health Care on Health Care Resource Utilization Following Hospital Discharge: A Cohort Study                                                                       | 2018 | US | US, unspecified    | 6363 patients                                                                            | Multiple                                                                                                   | multiple          |                          | partial care path                         | Direct and indirect | provider (proxy) | payer    | none; charges, transformed with cost-to-charge ratio | Charges/Reimbursements-based proxy       | N/A         | charges, transformed with cost-to-charge ratio                     | no                   |
| 6  | Ramshaw, B.<br>Forman, B. R.<br>Moore, K.<br>Heidel, E.<br>Fabian, M.<br>Mancini, G.                                  | Real-World Clinical Quality Improvement for Complex Abdominal Wall Reconstruction                                                                                                 | 2017 | US | US, Texas          | 102 patients                                                                             | Surgical, complex abdominal wall reconstruction                                                            | Surgical          | Abdominal                | full care path (surgical episode)         | Direct and indirect | provider         | provider | unspecified                                          | Absorption costing - unspecified/generic | implemented |                                                                    | no                   |
| 7  | Heinzelman, M.<br>Schumann, S. O.<br>Riley, J.<br>Zhang, J.<br>Marsden, J. E.<br>Mauldin, P. D.                       | Identification of High Utilization Inpatients on Internal Medicine Services                                                                                                       | 2016 | US | US, unspecified    | 7571 patients                                                                            | Internal medicine                                                                                          | Internal Medicine |                          | unspecified                               | Direct and indirect | provider         | provider | unspecified                                          | Absorption costing - unspecified/generic | implemented |                                                                    | no                   |
| 8  | Sheets, K. H.<br>Kenney, B.<br>Dupree, J. M.<br>Campbell, D. A.<br>Englesbe, M. J.                                    | Targeting Value-Driven Quality Improvement for Laparoscopic Cholecystectomy in Michigan                                                                                           | 2019 | US | US, Michigan       | 19213 patients                                                                           | Surgical, Laparoscopic Cholecystectomy                                                                     | Surgical          | Gallbladder              | partial care path                         | Direct and indirect | payer            | payer    | none, reimbursements                                 | Charges/Reimbursements-based             | N/A         | reimbursements                                                     | no                   |
| 9  | Zolin, S. J.<br>Tastaldi, L.<br>Alkhatib, H.<br>Lampert, E. J.<br>Brown, K.<br>Fafaj, A.                              | Open retromuscular versus laparoscopic ventral hernia repair for medium-sized defects: where is the value?                                                                        | 2020 | US | US, various states | All medicare shoulder surgeries 2002-2018                                                | orthopedics, Surgical, Shoulder surgery                                                                    | Surgical          | Abdominal                | partial care path                         | Direct and indirect | payer            | payer    | none, reimbursements                                 | Charges/Reimbursements-based             | N/A         | reimbursements                                                     | no                   |
| 10 | Ahluwalia, R.<br>Vainieri, E.<br>Tam, J.<br>Sait, S.<br>Sinha, A.<br>Mani, C. A.                                      | Surgical Diabetic Foot Debridement: Improving Training and Practice Utilizing the Traffic Light Principle                                                                         | 2019 | UK | UK, London         | single center, retrospective, direct observation, pre and post comparison<br>53 patients | Surgical, diabetic foot infection, diabetes                                                                | Surgical          | Diabetes                 | partial care path (full surgical episode) | Direct and indirect | payer            | payer    | TDABC                                                | Absorption costing - TDABC               | Paper only  |                                                                    | yes see second sheet |
| 11 | Ramly, E. P.<br>Laurentzakis, A.<br>Bolsen, J. D.<br>Mavros, M.<br>Chang, Y.<br>Lee, J.                               | The financial impact of intraoperative adverse events in abdominal surgery                                                                                                        | 2015 | US | US, Massachusetts  | 9111 patients                                                                            | surgical, abdominal surgery                                                                                | Surgical          | Abdominal                | unspecified                               | Direct and indirect | provider         | provider | unspecified                                          | Absorption costing - unspecified/generic | implemented |                                                                    | no                   |
| 12 | Orbanu, V.<br>Urits, I.<br>Olusunmade, M.<br>Owais, K.<br>Jones, M.<br>Galasso, A.                                    | Trends of Co-Morbid Depression in Hospitalized Patients with Failed Back Surgery Syndrome: An Analysis of the Nationwide Inpatient Sample                                         | 2018 | US | US, unspecified    | 115976 patients                                                                          | Surgical, depression, psychiatry                                                                           | Pain medicine     |                          | partial care path                         | Direct and indirect | payer            | payer    | none; charges                                        | Charges/Reimbursements-based             | N/A         |                                                                    | no                   |
| 13 | Hollenbeck, B.<br>Hoffman, M. A.<br>Trombanhauser, S. G.                                                              | High-Volume Arthroplasty Centers Demonstrate Higher Composite Quality Scores and Enhanced Value: Perspective on Higher-Volume Hospitals Performing Arthroplasty from 2001 to 2011 | 2020 | US | US, various states | 1651354 total hip or total knee arthroplasties                                           | orthopedics, surgical, total hip arthroplasty, total knee arthroplasty                                     | Surgical          | Orthopedic, arthroplasty | unspecified                               | Direct and indirect | provider (proxy) | payer    | none; charges                                        | Charges/Reimbursements-based             | N/A         | charges per quartile, discuss how it should be costs in discussion | no                   |
| 14 | Loftus, T. J.<br>Rosenthal, M. D.<br>Croft, C. A.<br>Stephen Smith, R.<br>Efron, P. A.<br>Moore, F. A.<br>Maha, A. M. | Effect of Time to Operation on Value of Care in Acute Care Surgery                                                                                                                | 2018 | US | US, Florida        | 800 patients                                                                             | Acute care, appendicitis, surgical, laparotomy for intra-abdominal sepsis with temporary abdominal closure | Surgical          | Appendicitis             | full care path (surgical episode)         | unspecified         | payer            | payer    | none, reimbursements                                 | Charges/Reimbursements-based             | N/A         | charges, discuss shortcoming in discussion                         | no                   |

|    |                                                                                                                                                 |      |    |                 |                                                          |                                                 |          |                     |                                   |             |       |       |                      |                              |     |                  |
|----|-------------------------------------------------------------------------------------------------------------------------------------------------|------|----|-----------------|----------------------------------------------------------|-------------------------------------------------|----------|---------------------|-----------------------------------|-------------|-------|-------|----------------------|------------------------------|-----|------------------|
| 1  | Buell, J. F.<br>Sigmon, D.<br>Dacon, C.<br>Shapiro, M.<br>Teja, N.<br>Wynter, E.<br>Jain, N.<br>Phillips, F. M.<br>Shimer, A. L.<br>Khan, S. N. | 2017 | US | US, Louisiana   | 73 patients                                              | Surgical, complex abdominal wall reconstruction | Surgical | Abdominal           | full care path (surgical episode) | unspecified | payer | payer | none, charges        | Charges/Reimbursements-based | N/A | no               |
| 2  |                                                                                                                                                 |      |    |                 |                                                          |                                                 |          |                     |                                   |             |       |       |                      |                              |     |                  |
| 3  |                                                                                                                                                 |      |    |                 |                                                          |                                                 |          |                     |                                   |             |       |       |                      |                              |     |                  |
| 4  |                                                                                                                                                 |      |    |                 |                                                          |                                                 |          |                     |                                   |             |       |       |                      |                              |     |                  |
| 5  |                                                                                                                                                 |      |    |                 |                                                          |                                                 |          |                     |                                   |             |       |       |                      |                              |     |                  |
| 6  |                                                                                                                                                 |      |    |                 |                                                          |                                                 |          |                     |                                   |             |       |       |                      |                              |     |                  |
| 7  |                                                                                                                                                 |      |    |                 |                                                          |                                                 |          |                     |                                   |             |       |       |                      |                              |     |                  |
| 8  | Stull, J. D.<br>Bhat, S. B.<br>Kane, J. M.<br>Raikan, S. M.                                                                                     | 2017 | US | US, unspecified | 76 cases/patients, and 48044 retrospective patient files | orthopedics, Surgical, ankle fractures          | Surgical | Orthopedic fracture | unspecified                       | unspecified | payer | payer | none, reimbursements | Charges/Reimbursements-based | N/A | reimbursement no |
| 9  |                                                                                                                                                 |      |    |                 |                                                          |                                                 |          |                     |                                   |             |       |       |                      |                              |     |                  |
| 10 |                                                                                                                                                 |      |    |                 |                                                          |                                                 |          |                     |                                   |             |       |       |                      |                              |     |                  |
| 11 |                                                                                                                                                 |      |    |                 |                                                          |                                                 |          |                     |                                   |             |       |       |                      |                              |     |                  |
| 12 |                                                                                                                                                 |      |    |                 |                                                          |                                                 |          |                     |                                   |             |       |       |                      |                              |     |                  |
| 13 |                                                                                                                                                 |      |    |                 |                                                          |                                                 |          |                     |                                   |             |       |       |                      |                              |     |                  |
| 14 |                                                                                                                                                 |      |    |                 |                                                          |                                                 |          |                     |                                   |             |       |       |                      |                              |     |                  |
| 15 |                                                                                                                                                 |      |    |                 |                                                          |                                                 |          |                     |                                   |             |       |       |                      |                              |     |                  |
| 16 |                                                                                                                                                 |      |    |                 |                                                          |                                                 |          |                     |                                   |             |       |       |                      |                              |     |                  |
| 17 |                                                                                                                                                 |      |    |                 |                                                          |                                                 |          |                     |                                   |             |       |       |                      |                              |     |                  |
| 18 |                                                                                                                                                 |      |    |                 |                                                          |                                                 |          |                     |                                   |             |       |       |                      |                              |     |                  |
| 19 |                                                                                                                                                 |      |    |                 |                                                          |                                                 |          |                     |                                   |             |       |       |                      |                              |     |                  |
| 20 |                                                                                                                                                 |      |    |                 |                                                          |                                                 |          |                     |                                   |             |       |       |                      |                              |     |                  |
| 21 |                                                                                                                                                 |      |    |                 |                                                          |                                                 |          |                     |                                   |             |       |       |                      |                              |     |                  |
| 22 |                                                                                                                                                 |      |    |                 |                                                          |                                                 |          |                     |                                   |             |       |       |                      |                              |     |                  |
| 23 |                                                                                                                                                 |      |    |                 |                                                          |                                                 |          |                     |                                   |             |       |       |                      |                              |     |                  |
| 24 |                                                                                                                                                 |      |    |                 |                                                          |                                                 |          |                     |                                   |             |       |       |                      |                              |     |                  |
| 25 |                                                                                                                                                 |      |    |                 |                                                          |                                                 |          |                     |                                   |             |       |       |                      |                              |     |                  |
| 26 |                                                                                                                                                 |      |    |                 |                                                          |                                                 |          |                     |                                   |             |       |       |                      |                              |     |                  |
| 27 |                                                                                                                                                 |      |    |                 |                                                          |                                                 |          |                     |                                   |             |       |       |                      |                              |     |                  |
| 28 |                                                                                                                                                 |      |    |                 |                                                          |                                                 |          |                     |                                   |             |       |       |                      |                              |     |                  |
| 29 |                                                                                                                                                 |      |    |                 |                                                          |                                                 |          |                     |                                   |             |       |       |                      |                              |     |                  |
| 30 |                                                                                                                                                 |      |    |                 |                                                          |                                                 |          |                     |                                   |             |       |       |                      |                              |     |                  |
| 31 |                                                                                                                                                 |      |    |                 |                                                          |                                                 |          |                     |                                   |             |       |       |                      |                              |     |                  |
| 32 |                                                                                                                                                 |      |    |                 |                                                          |                                                 |          |                     |                                   |             |       |       |                      |                              |     |                  |
| 33 |                                                                                                                                                 |      |    |                 |                                                          |                                                 |          |                     |                                   |             |       |       |                      |                              |     |                  |
| 34 |                                                                                                                                                 |      |    |                 |                                                          |                                                 |          |                     |                                   |             |       |       |                      |                              |     |                  |
| 35 |                                                                                                                                                 |      |    |                 |                                                          |                                                 |          |                     |                                   |             |       |       |                      |                              |     |                  |
| 36 |                                                                                                                                                 |      |    |                 |                                                          |                                                 |          |                     |                                   |             |       |       |                      |                              |     |                  |
| 37 |                                                                                                                                                 |      |    |                 |                                                          |                                                 |          |                     |                                   |             |       |       |                      |                              |     |                  |
| 38 |                                                                                                                                                 |      |    |                 |                                                          |                                                 |          |                     |                                   |             |       |       |                      |                              |     |                  |
| 39 |                                                                                                                                                 |      |    |                 |                                                          |                                                 |          |                     |                                   |             |       |       |                      |                              |     |                  |
| 40 |                                                                                                                                                 |      |    |                 |                                                          |                                                 |          |                     |                                   |             |       |       |                      |                              |     |                  |
| 41 |                                                                                                                                                 |      |    |                 |                                                          |                                                 |          |                     |                                   |             |       |       |                      |                              |     |                  |
| 42 |                                                                                                                                                 |      |    |                 |                                                          |                                                 |          |                     |                                   |             |       |       |                      |                              |     |                  |
| 43 |                                                                                                                                                 |      |    |                 |                                                          |                                                 |          |                     |                                   |             |       |       |                      |                              |     |                  |
| 44 |                                                                                                                                                 |      |    |                 |                                                          |                                                 |          |                     |                                   |             |       |       |                      |                              |     |                  |
| 45 |                                                                                                                                                 |      |    |                 |                                                          |                                                 |          |                     |                                   |             |       |       |                      |                              |     |                  |
| 46 |                                                                                                                                                 |      |    |                 |                                                          |                                                 |          |                     |                                   |             |       |       |                      |                              |     |                  |

|                                                                                                                                                                                                         |      |                 |                    |                                                                                                                                  |                                                                     |                                                     |                                                                                  |               |                                           |                                           |                     |                 |                   |                                          |                                          |                      |                      |
|---------------------------------------------------------------------------------------------------------------------------------------------------------------------------------------------------------|------|-----------------|--------------------|----------------------------------------------------------------------------------------------------------------------------------|---------------------------------------------------------------------|-----------------------------------------------------|----------------------------------------------------------------------------------|---------------|-------------------------------------------|-------------------------------------------|---------------------|-----------------|-------------------|------------------------------------------|------------------------------------------|----------------------|----------------------|
| Kaplan, A. L., Agarwal, N., Setlur, N. P., Tian, H. J., Niedzwiecki, D., McLaughlin, N., Pong, J., Crawford, K., Faraji, R., Ramsay, C., Kemp, A., Califano, J. A.                                      | 2015 | US              | US, California     | Measuring the cost of care in benign prostatic hyperplasia using time driven activity-based costing (TDABC)                      | single center, retrospective, direct observation                    | one care pathway, 5 surgical options                | Urology, benign prostatic hyperplasia                                            | Urology       | partial care path (full surgical episode) | Direct and indirect                       | provider            | provider        | TDABC             | Absorption costing - TDABC               | unspecified                              | yes see second sheet |                      |
| Lobatto, D. J., van den Hout, W. B., de Vries, F. F., Schutte, P. J., Patel, M. I., Ramirez, D., Agajanian, R., Agajanian, H., Coker, T.                                                                | 2020 | US              | US; various states | An Analysis of 1-Year Charges for Head and Neck Cancer: Targets for Value-Based Interventions                                    |                                                                     | 196 consecutive patients                            | Oncology, head and neck cancer                                                   | Oncology      | partial care path                         | Direct and indirect                       | payer               | payer           | none; charges     | Charges/Reimbursement-based              | N/A                                      | charges no           |                      |
| Lobatto, D. J., van den Hout, W. B., de Vries, F. F., Schutte, P. J., Patel, M. I., Ramirez, D., Agajanian, R., Agajanian, H., Coker, T.                                                                | 2020 | The Netherlands | The Netherlands    | Feasibility, safety, and outcomes of a stratified fast-track care trajectory in pituitary surgery                                | prospective, observational study, process mapping                   | 155 patients                                        | Endocrinology, surgical, pituitary                                               | endocrinology | partial care path (full surgical episode) | Direct and indirect                       | provider            | provider        | reference pricing | Absorption costing - unspecified/generic | Paper only                               | no                   |                      |
| Jalilian, H., Doshmangir, L., Ajami, S., Mir, H., Siraneh, Y., Hasanpoor, E.                                                                                                                            | 2019 | Iran            | Iran               | Economic burden of gastric cancer in the first six months after diagnosis                                                        |                                                                     | 118 patients                                        | Oncology, bowel, gastric cancer                                                  | Oncology      | unspecified                               | Direct and indirect                       | provider            | provider        | unspecified       | Absorption costing - unspecified/generic | Paper only                               | no                   |                      |
| Lobatto, D. J., van den Hout, W. B., Najafabadi, A. H. Z., Steffens, A. N. V., Andela, C. D., Pereira, A. M., Gray, C. F., Prieto, H. A., Deen, J. T., Parvataneni, H. K.                               | 2019 | The Netherlands | The Netherlands    | Healthcare utilization and costs among patients with non-functioning pituitary adenomas                                          |                                                                     | 167 patients                                        | Endocrinology, Pituitary adenoma                                                 | endocrinology | partial care path                         | Direct and indirect                       | provider            | provider        | reference pricing | Absorption costing - unspecified/generic | N/A                                      | no                   |                      |
| Kurt, P., Saban, M., Cankaya, F., Annac, M. C.                                                                                                                                                          | 2019 | US              | US, Florida        | Bundled Payment "Creep": Institutional Redesign for Primary Arthroplasty Positively Affects Revision Arthroplasty                |                                                                     | 168 patients                                        | orthopedics, total joint arthroplasty                                            | Surgical      | Orthopedic, arthroplasty                  | full care path (surgical episode)         | Direct and indirect | payer, provider | provider          | none; charges                            | Charges/Reimbursement-based              | Direct costing N/A   | no                   |
| Thaci, B., McGirt, M. J., Ammerman, J. M., Thome, C., Kim, K. D., Ament, J. D.                                                                                                                          | 2019 | Turkey          | Turkey             | Time-Driven Activity-Based Costing in the Ophthalmology Department of State Hospital: A Case Study                               | single center, retrospective, case study                            | case study; 5 surgical procedures in one department | Ophthalmology                                                                    | ophthalmology | full care path                            | Direct and indirect                       | provider            | provider        | TDABC             | Absorption costing - TDABC               | Paper only                               | yes see second sheet |                      |
| Karns, M. R., Jones, D. L., Todd, D. C., Maak, T. G., Aoki, S. K., Barks, R. T., Robinson, J. R., Carter, N. H., Gibson, C., Brinkman, A. S., Van Arendonk, K., Speck, K. E., Gupta, P., Rettiganti, M. | 2018 | US              | US, California     | Reduction of direct costs in high-risk lumbar discectomy patients during the 90-day post-operative period through amular closure | randomized controlled trial                                         | 272 patients                                        | Surgical, high-risk lumbar discectomy                                            | Surgical      | Spine                                     | partial care path                         | Direct and indirect | payer           | payer             | none; charges                            | Charges/Reimbursement-based              | N/A                  | no                   |
| Ilg, A. M., Laviana, A. A., Kamrava, M., Veruttipong, D., Steinberg, M., Park, S. J., McLaughlin, N., Burke, M. A., Setlur, N. P., Niedzwiecki, D. R., Kaplan, A. L., Saigal, C., Mishkin, A.           | 2018 | US              | US, Utah           | Patient- and Procedure-Specific Variables Driving Total Direct Costs of Outpatient Anterior Cruciate Ligament Reconstruction     | Retrospective cohort, single center, economic and decision analysis | 434 patients                                        | orthopedic, surgical, Anterior Cruciate Ligament Reconstruction, sports medicine | Surgical      | Orthopedic                                | partial care path (full surgical episode) | Direct              | provider        | provider          | VDO tool, total direct costs             | Direct costing                           | implemented          | yes see second sheet |
| Robinson, J. R., Carter, N. H., Gibson, C., Brinkman, A. S., Van Arendonk, K., Speck, K. E., Gupta, P., Rettiganti, M.                                                                                  | 2018 | US              | US, Tennessee      | Improving the value of care for appendectomy through an individual surgeon-specific approach                                     | prospective observational study                                     | 216 patients                                        | Appendicitis, surgical                                                           | Surgical      | Appendicitis                              | partial care path (full surgical episode) | Direct and indirect | provider        | provider          | reference pricing                        | Absorption costing - unspecified/generic | N/A                  | yes see second sheet |
| Ilg, A. M., Laviana, A. A., Kamrava, M., Veruttipong, D., Steinberg, M., Park, S. J., McLaughlin, N., Burke, M. A., Setlur, N. P., Niedzwiecki, D. R., Kaplan, A. L., Saigal, C., Mishkin, A.           | 2017 | US              | US; various states | Relationship of Hospital Costs With Mortality in Pediatric Critical Care: A Multi-Institutional Analysis                         | single center, pre and post intervention                            | 917,663 patients, 47 hospitals                      | Acute care, pediatrics                                                           | pediatrics    | Pediatric acute care                      | partial care path                         | unspecified         | payer           | payer             | unspecified                              | Charges/Reimbursement-based              | N/A                  | charges no           |
| Ilg, A. M., Laviana, A. A., Kamrava, M., Veruttipong, D., Steinberg, M., Park, S. J., McLaughlin, N., Burke, M. A., Setlur, N. P., Niedzwiecki, D. R., Kaplan, A. L., Saigal, C., Mishkin, A.           | 2016 | US              | US, California     | Time-driven activity-based costing of low-dose-rate and high-dose-rate brachytherapy for low-risk prostate cancer                | single center, retrospective, process mapping, direct observation   | 2 treatment options                                 | Oncology, prostate cancer, brachytherapy                                         | Oncology      | full care path                            | Direct and indirect                       | provider            | provider        | TDABC             | Absorption costing - TDABC               | Paper only                               | yes see second sheet |                      |
| Ilg, A. M., Laviana, A. A., Kamrava, M., Veruttipong, D., Steinberg, M., Park, S. J., McLaughlin, N., Burke, M. A., Setlur, N. P., Niedzwiecki, D. R., Kaplan, A. L., Saigal, C., Mishkin, A.           | 2014 | US              | US, California     | Time-driven activity-based costing: a driver for provider engagement in costing activities and redesign initiatives              | single center, process mapping                                      | 2 pilots                                            | Urology, neurosurgery                                                            | Surgical      | Neurosurgery                              | partial care path (full surgical episode) | Direct and indirect | provider        | provider          | TDABC                                    | Absorption costing - TDABC               | implemented          | no                   |

|    |                                                                                                                                                                                                                                                        |      |           |                    |                                        |                                         |                                                              |                             |                          |                                   |                     |          |              |                                                               |                                          |             |                                    |                      |
|----|--------------------------------------------------------------------------------------------------------------------------------------------------------------------------------------------------------------------------------------------------------|------|-----------|--------------------|----------------------------------------|-----------------------------------------|--------------------------------------------------------------|-----------------------------|--------------------------|-----------------------------------|---------------------|----------|--------------|---------------------------------------------------------------|------------------------------------------|-------------|------------------------------------|----------------------|
| 1  | Keating, C. L., Dixon, J. B., Moodie, M. L., Pieters, A., Playfair, J., O'Brien, P. E.                                                                                                                                                                 | 2009 | Australia | Australia          | randomized controlled trial            | 40 patients, 23 surgical, 7 medical     | Surgical, Diabetes                                           | Internal Medicine           | unspecified              | Direct                            | provider            | provider | direct costs | Direct costing                                                | Paper only                               | no          |                                    |                      |
| 2  | Nelson, A. A., Pearce, D. J., Fleischer, A. B., Balkrishnan, R., Feldman, S. R.                                                                                                                                                                        | 2005 | US        | US; Ohio           | 208 inpatient admissions               |                                         | Psoriasis, Dermatology                                       | Dermatology                 |                          | partial care path                 | Direct and indirect | payer    | payer        | none; charges                                                 | Charges/Reimbursements t-based           | N/A         | charges                            | no                   |
| 3  | Yanik, John M., Bedard, Nicholas A., Hanley, Jessica M., Otero, Jesse E., Callaghan, John J., Marsh, John L.                                                                                                                                           | 2018 | US        | US; Iowa           | 78 patients                            |                                         | orthopedics, total hip arthroplasty, total knee arthroplasty | Surgical                    | Orthopedic, arthroplasty | full care path                    | Direct and indirect | provider | provider     | unspecified; Hospital accounting data not otherwise specified | Absorption costing - unspecified/generic | unspecified |                                    | no                   |
| 4  | Zhang, Steven, Vora, Molly, Harris, Alex H. S., Baker, Laurence, Curtin, Catherine, Kamal, Robin N.                                                                                                                                                    | 2016 | US        | US; California     | 16 million patient records             |                                         | Carpal Tunnel Release                                        | Surgical                    | Carpal Tunnel Release    | full care path (surgical episode) | Direct and indirect | payer    | payer        | none, reimbursements                                          | Charges/Reimbursements t-based           | N/A         | reimbursements                     | no                   |
| 5  | A. Adenkinju, R. Ranson, S. A. Rettig, K. A. Egol and S. R. Konda                                                                                                                                                                                      | 2021 | US        | US; New York       |                                        |                                         | Orthopedic, Geriatric, Operative Distal Radius Fractures     | Surgical                    | Orthopedic fracture      | unspecified                       | Direct and indirect | payer    | payer        | unspecified; Hospital accounting data not otherwise specified | Charges/Reimbursements t-based           | N/A         | index admission cost, per category | no                   |
| 6  | A. Albrahim, Y. Abdulsalam, S. Al Mutawa, H. Behbehani, D. Alhuwail and S. Al Jenaei                                                                                                                                                                   | 2021 | Kuwait    | Kuwait             | single center, observation, interviews | one pharmacy                            | Diabetes, pharmacy                                           | Internal Medicine           |                          | partial care path                 | Direct and indirect | provider | provider     | TDABC                                                         | Absorption costing - TDABC               | unspecified |                                    | yes see second sheet |
| 7  | D. J. Baughman, A. Waheed, M. N. Khan and J. M. Nicholson                                                                                                                                                                                              | 2021 | US        | US; Pennsylvania   |                                        |                                         | Emergency care                                               | emergency care & acute care |                          | unspecified                       | Direct and indirect | payer    | payer        | none; charges                                                 | Charges/Reimbursements t-based           | N/A         | average charges                    | no                   |
| 8  | J. A. Berinstein, S. A. Cohen-Mekelburg, G. M. Greenberg, D. Wray, S. K. Berry, S. D. Saini, A. M. Fendrick, M. A. Adams, A. K. Wajjee and D. D. Hwang                                                                                                 | 2021 | US        | US; Michigan       |                                        |                                         | IBS/IBD inflammatory bowel disease                           | Internal Medicine           |                          | partial care path                 | Direct and indirect | payer    | payer        | none; charges                                                 | Charges/Reimbursements t-based           | N/A         | charges                            | no                   |
| 9  | A. Beschloss, C. Dicindio, J. Lombardi, A. Varthi, A. Ozurk, R. Lehman, L. Lenke and C. Saifi                                                                                                                                                          | 2021 | US        | US; various states |                                        |                                         | Orthopedic, Spinal Deformity Surgery                         | Surgical                    | Spine                    | full care path                    | Direct and indirect | provider | provider     | none; charges                                                 | Charges/Reimbursements t-based           | N/A         | unspecified                        | no                   |
| 10 | H. Baeno, J. L. Bernal, V. Jimenez-Jimenez, F. J. Martin-Sanchez, X. Rosello, G. Moreno, C. Goni, V. Gil, P. Llorens, N. Naranjo, J. Lopez, D. Hernandez, R. A. Burnett Iii, J. Yang, P. M. Courtney, E. B. Terhune, C. P. Hamon and C. J. Della Valle | 2021 | Spain     | Spain              | Retrospective, multi-center            | 30 day period of heart failure patients | heart failure, cardiovascular                                | Cardiology                  |                          | partial care path                 | Direct and indirect | provider | provider     | DRG costs                                                     | Absorption costing - unspecified/generic | implemented |                                    | yes see second sheet |
| 11 | M. Casey, D. Perera, J. Enticott, H. Vo, S. Cubra, A. Gravell, M. Waerea and G. Habib                                                                                                                                                                  | 2021 | US        | US; various states |                                        |                                         | Total knee arthroplasty, orthopedic                          | Surgical                    | Orthopedic, arthroplasty | full care path                    | Direct and indirect | provider | provider     | none; reimbursements                                          | Charges/Reimbursements t-based           | N/A         | reimbursement                      | no                   |
| 12 | K. A. Chovancec, C. Arsene, A. Beck and B. Liddel                                                                                                                                                                                                      | 2022 | Australia | Australia          |                                        |                                         | Emergency care                                               | emergency care & acute care |                          | partial care path                 | Direct and indirect | provider | provider     | unspecified; Hospital accounting data not otherwise specified | Absorption costing - unspecified/generic | N/A         |                                    | yes see second sheet |
| 13 | R. V. Cohen, A. M. Nishikawa, R. A. Ribeiro, F. M. Oliveira, P. C. Andrade, S. M. Junqueira and B. Toldo                                                                                                                                               | 2021 | US        | US; various states |                                        |                                         | Various, post-acute                                          | emergency care & acute care |                          | partial care path                 | Direct and indirect | payer    | payer        | none; charges                                                 | Charges/Reimbursements t-based           | N/A         | charges                            | no                   |
| 14 | R. V. Cohen, A. M. Nishikawa, R. A. Ribeiro, F. M. Oliveira, P. C. Andrade, S. M. Junqueira and B. Toldo                                                                                                                                               | 2021 | Brazil    | Brazil             |                                        |                                         | Obesity, surgical, bariatric surgery                         | Surgical                    | Bariatric                | full care path                    | Direct and indirect | provider | provider     | reference pricing                                             | Absorption costing - unspecified/generic | N/A         |                                    | yes see second sheet |

|    |                                                                                                                                                                                                                            |      |        |              |                                                           |                          |                                                          |            |                                   |                                   |                     |          |          |                            |                            |                      |                      |
|----|----------------------------------------------------------------------------------------------------------------------------------------------------------------------------------------------------------------------------|------|--------|--------------|-----------------------------------------------------------|--------------------------|----------------------------------------------------------|------------|-----------------------------------|-----------------------------------|---------------------|----------|----------|----------------------------|----------------------------|----------------------|----------------------|
| 1  | A. P. B. da Silva Etges, L. N. Cruz, R. Schlatter, J. Neyeloff, R. B. Cardoso, L. Koptilke, A. A. Nunes, J. A. Neto, J. L. Nogueira, R. M. de Aguiar, J. S. D. Tobias, J. M. Dziemianowicz, J. Burneister and M. Dominello | 2022 | Brazil | Brazil       | multi center, retrospective, process mapping, 5 hospitals | 5 hospitals, 90 patients | Interventional Coronary Procedures                       | Cardiology | full care path (surgical episode) | Direct and indirect               | provider            | provider | TDABC    | Absorption costing - TDABC | unspecified                | yes see second sheet |                      |
| 2  |                                                                                                                                                                                                                            |      |        |              |                                                           |                          |                                                          |            |                                   |                                   |                     |          |          |                            |                            |                      |                      |
| 3  |                                                                                                                                                                                                                            |      |        |              |                                                           |                          |                                                          |            |                                   |                                   |                     |          |          |                            |                            |                      |                      |
| 4  |                                                                                                                                                                                                                            |      |        |              |                                                           |                          |                                                          |            |                                   |                                   |                     |          |          |                            |                            |                      |                      |
| 5  |                                                                                                                                                                                                                            |      |        |              |                                                           |                          |                                                          |            |                                   |                                   |                     |          |          |                            |                            |                      |                      |
| 6  |                                                                                                                                                                                                                            |      |        |              |                                                           |                          |                                                          |            |                                   |                                   |                     |          |          |                            |                            |                      |                      |
| 7  |                                                                                                                                                                                                                            |      |        |              |                                                           |                          |                                                          |            |                                   |                                   |                     |          |          |                            |                            |                      |                      |
| 8  | C. Fang, A. Hagar, M. Gordon, C. T. Talamo, D. A. Mattingly and E. L. Smith                                                                                                                                                | 2021 | US     | US; Michigan | single center, retrospective, patient comparison          | 889 surgeries            | Geriatrics, Orthopedic, Primary Total Joint Arthroplasty | Surgical   | Orthopedic fracture               | full care path (surgical episode) | Direct and indirect | provider | provider | TDABC                      | Absorption costing - TDABC | Paper only           | yes see second sheet |
| 9  |                                                                                                                                                                                                                            |      |        |              |                                                           |                          |                                                          |            |                                   |                                   |                     |          |          |                            |                            |                      |                      |
| 10 |                                                                                                                                                                                                                            |      |        |              |                                                           |                          |                                                          |            |                                   |                                   |                     |          |          |                            |                            |                      |                      |
| 11 |                                                                                                                                                                                                                            |      |        |              |                                                           |                          |                                                          |            |                                   |                                   |                     |          |          |                            |                            |                      |                      |
| 12 |                                                                                                                                                                                                                            |      |        |              |                                                           |                          |                                                          |            |                                   |                                   |                     |          |          |                            |                            |                      |                      |
| 13 |                                                                                                                                                                                                                            |      |        |              |                                                           |                          |                                                          |            |                                   |                                   |                     |          |          |                            |                            |                      |                      |
| 14 |                                                                                                                                                                                                                            |      |        |              |                                                           |                          |                                                          |            |                                   |                                   |                     |          |          |                            |                            |                      |                      |
| 15 |                                                                                                                                                                                                                            |      |        |              |                                                           |                          |                                                          |            |                                   |                                   |                     |          |          |                            |                            |                      |                      |
| 16 |                                                                                                                                                                                                                            |      |        |              |                                                           |                          |                                                          |            |                                   |                                   |                     |          |          |                            |                            |                      |                      |
| 17 |                                                                                                                                                                                                                            |      |        |              |                                                           |                          |                                                          |            |                                   |                                   |                     |          |          |                            |                            |                      |                      |
| 18 |                                                                                                                                                                                                                            |      |        |              |                                                           |                          |                                                          |            |                                   |                                   |                     |          |          |                            |                            |                      |                      |
| 19 |                                                                                                                                                                                                                            |      |        |              |                                                           |                          |                                                          |            |                                   |                                   |                     |          |          |                            |                            |                      |                      |
| 20 |                                                                                                                                                                                                                            |      |        |              |                                                           |                          |                                                          |            |                                   |                                   |                     |          |          |                            |                            |                      |                      |
| 21 |                                                                                                                                                                                                                            |      |        |              |                                                           |                          |                                                          |            |                                   |                                   |                     |          |          |                            |                            |                      |                      |
| 22 |                                                                                                                                                                                                                            |      |        |              |                                                           |                          |                                                          |            |                                   |                                   |                     |          |          |                            |                            |                      |                      |
| 23 |                                                                                                                                                                                                                            |      |        |              |                                                           |                          |                                                          |            |                                   |                                   |                     |          |          |                            |                            |                      |                      |
| 24 |                                                                                                                                                                                                                            |      |        |              |                                                           |                          |                                                          |            |                                   |                                   |                     |          |          |                            |                            |                      |                      |
| 25 |                                                                                                                                                                                                                            |      |        |              |                                                           |                          |                                                          |            |                                   |                                   |                     |          |          |                            |                            |                      |                      |
| 26 |                                                                                                                                                                                                                            |      |        |              |                                                           |                          |                                                          |            |                                   |                                   |                     |          |          |                            |                            |                      |                      |
| 27 |                                                                                                                                                                                                                            |      |        |              |                                                           |                          |                                                          |            |                                   |                                   |                     |          |          |                            |                            |                      |                      |
| 28 |                                                                                                                                                                                                                            |      |        |              |                                                           |                          |                                                          |            |                                   |                                   |                     |          |          |                            |                            |                      |                      |
| 29 |                                                                                                                                                                                                                            |      |        |              |                                                           |                          |                                                          |            |                                   |                                   |                     |          |          |                            |                            |                      |                      |
| 30 |                                                                                                                                                                                                                            |      |        |              |                                                           |                          |                                                          |            |                                   |                                   |                     |          |          |                            |                            |                      |                      |
| 31 |                                                                                                                                                                                                                            |      |        |              |                                                           |                          |                                                          |            |                                   |                                   |                     |          |          |                            |                            |                      |                      |
| 32 |                                                                                                                                                                                                                            |      |        |              |                                                           |                          |                                                          |            |                                   |                                   |                     |          |          |                            |                            |                      |                      |
| 33 |                                                                                                                                                                                                                            |      |        |              |                                                           |                          |                                                          |            |                                   |                                   |                     |          |          |                            |                            |                      |                      |
| 34 |                                                                                                                                                                                                                            |      |        |              |                                                           |                          |                                                          |            |                                   |                                   |                     |          |          |                            |                            |                      |                      |
| 35 |                                                                                                                                                                                                                            |      |        |              |                                                           |                          |                                                          |            |                                   |                                   |                     |          |          |                            |                            |                      |                      |
| 36 |                                                                                                                                                                                                                            |      |        |              |                                                           |                          |                                                          |            |                                   |                                   |                     |          |          |                            |                            |                      |                      |
| 37 |                                                                                                                                                                                                                            |      |        |              |                                                           |                          |                                                          |            |                                   |                                   |                     |          |          |                            |                            |                      |                      |
| 38 |                                                                                                                                                                                                                            |      |        |              |                                                           |                          |                                                          |            |                                   |                                   |                     |          |          |                            |                            |                      |                      |
| 39 |                                                                                                                                                                                                                            |      |        |              |                                                           |                          |                                                          |            |                                   |                                   |                     |          |          |                            |                            |                      |                      |
| 40 |                                                                                                                                                                                                                            |      |        |              |                                                           |                          |                                                          |            |                                   |                                   |                     |          |          |                            |                            |                      |                      |
| 41 |                                                                                                                                                                                                                            |      |        |              |                                                           |                          |                                                          |            |                                   |                                   |                     |          |          |                            |                            |                      |                      |
| 42 |                                                                                                                                                                                                                            |      |        |              |                                                           |                          |                                                          |            |                                   |                                   |                     |          |          |                            |                            |                      |                      |
| 43 |                                                                                                                                                                                                                            |      |        |              |                                                           |                          |                                                          |            |                                   |                                   |                     |          |          |                            |                            |                      |                      |
| 44 |                                                                                                                                                                                                                            |      |        |              |                                                           |                          |                                                          |            |                                   |                                   |                     |          |          |                            |                            |                      |                      |
| 45 |                                                                                                                                                                                                                            |      |        |              |                                                           |                          |                                                          |            |                                   |                                   |                     |          |          |                            |                            |                      |                      |
| 46 |                                                                                                                                                                                                                            |      |        |              |                                                           |                          |                                                          |            |                                   |                                   |                     |          |          |                            |                            |                      |                      |

|    |                                                                                                                                                                                                                                                                                                                |                                                                                                                                                                                               |      |        |                |                                                                                                    |                                           |                                                                          |                         |                                |                                   |                     |          |                                                       |                                          |                                          |                |                      |                      |
|----|----------------------------------------------------------------------------------------------------------------------------------------------------------------------------------------------------------------------------------------------------------------------------------------------------------------|-----------------------------------------------------------------------------------------------------------------------------------------------------------------------------------------------|------|--------|----------------|----------------------------------------------------------------------------------------------------|-------------------------------------------|--------------------------------------------------------------------------|-------------------------|--------------------------------|-----------------------------------|---------------------|----------|-------------------------------------------------------|------------------------------------------|------------------------------------------|----------------|----------------------|----------------------|
| 1  | H. Ko, D. S. Brodtk, M. E. Vanneman, A. J. Schoenfeld and B. I. Martin                                                                                                                                                                                                                                         | Is Discretionary Care Associated with Safety Among Medicare Beneficiaries Undergoing Spine Surgery?                                                                                           | 2021 | US     | US; various    |                                                                                                    | spine surgery, surgical                   | Surgical                                                                 | Spine                   | partial care path              | Direct and indirect               | payer               | payer    | none; reimbursements                                  | Charges/Reimbursements-based             | N/A                                      | reimbursements | no                   |                      |
| 2  | S. R. Konda, J. R. Johnson, N. Dethia, E. A. Kelly and K. A. Egol                                                                                                                                                                                                                                              | Can We Stratify Quality and Cost for Older Patients With Proximal and Midshaft Humerus Fractures?                                                                                             | 2021 | US     | US; various    |                                                                                                    | Humerus Fractures, geriatrics, orthopedic | Surgical                                                                 | Orthopedic fracture     | unspecified                    | Direct                            | provider            | provider | direct variable costs as an estimation of total costs | Direct costing                           | N/A                                      |                | no                   |                      |
| 3  | A. T. Malik, S. N. Khan, R. T. Voskuil, J. H. Alexander, J. P. Drain and T. J. Scharschmidt                                                                                                                                                                                                                    | What Is the Value of Undergoing Surgery for Spinal Metastases at Dedicated Cancer Centers?                                                                                                    | 2021 | US     | US; various    |                                                                                                    | Orthopedic, Surgical, spine surgery       | Oncology                                                                 |                         | partial care path              | Direct and indirect               | payer               | payer    | none; reimbursements                                  | Charges/Reimbursements-based             | N/A                                      | reimbursements | no                   |                      |
| 4  | T. R. McClintock, D. F. Friedlander, A. Y. Feng, M. A. Shah, D. J. Pallin, S. L. Chang, A. M. Bader, T. W. Feeley, R. S. Kaplan and G. E. Latt                                                                                                                                                                 | Determining Variable Costs in the Acute Urolithiasis Cycle of Care Through Time-Driven Activity-Based Costing                                                                                 | 2021 | US     | US; Boston     | multi center, retrospective, process mapping, unspecified number of patients, acute stone episodes | Acute Urolithiasis                        | emergency care & acute care                                              |                         | full care path                 | Direct and indirect               | provider            | provider | TDABC                                                 | Absorption costing - TDABC               | unspecified                              |                | yes see second sheet |                      |
| 5  | R. Negrini, R. D. da Silva Ferreira and D. Z. Guimaraes                                                                                                                                                                                                                                                        | Value-based care in obstetrics: comparison between vaginal birth and caesarean section                                                                                                        | 2021 | Brazil | Brazil         | single center, retrospective, process mapping                                                      | 9345 deliveries                           | Obstetrics, birth, vaginal birth, caesarean birth                        | gynecology & obstetrics |                                | full care path                    | Direct and indirect | provider | provider                                              | direct and indirect costs                | Absorption costing - unspecified/generic | Paper only     |                      | yes see second sheet |
| 6  | T. V. Newman, K. D. Munshi, L. M. Neilson, C. B. Good, E. C. S. Swart, Y. Huang, R. Henderson and N. Parekh                                                                                                                                                                                                    | Health care utilization and costs associated with switching from DPP-4i to GLP-1RA or SGLT2: an observational cohort study                                                                    | 2021 | US     | US; various    |                                                                                                    | Diabetes                                  | Internal Medicine                                                        |                         | partial care path              | Direct and indirect               | payer               | payer    | none; charges                                         | Charges/Reimbursements-based             | N/A                                      | charges        | no                   |                      |
| 7  | N. Panda, L. Shagabayeveva, C. E. Comrie, N. Phan, P. Moonssamy, C. F. Jeffrey Yang, F. G. Fernandez and C. R. S. K. Pasquali, D. Thibault, M. Hall, K. Chiswell, J. C. Romano, J. W. Gaynor, D. M. Shahian, M. L. Jacobs, M. G. Gales, S. M. Pappas, R. K. Sethi, R. P. Pumpian, C. E. Drolet and P. K. Louie | Drivers of Cost Associated With Minimally Invasive Esophagectomy                                                                                                                              | 2022 | US     | US; Boston     |                                                                                                    | esophagectomy, surgical, thoracic surgery | Surgical                                                                 | Cardiac/Thoracic        | full care path                 | Direct                            | provider            | provider | direct costs                                          | Direct costing                           | N/A                                      |                | no                   |                      |
| 8  | S. K. Pasquali, D. Thibault, M. Hall, K. Chiswell, J. C. Romano, J. W. Gaynor, D. M. Shahian, M. L. Jacobs, M. G. Gales, S. M. Pappas, R. K. Sethi, R. P. Pumpian, C. E. Drolet and P. K. Louie                                                                                                                | Evolving Cost-Quality Relationship in Pediatric Heart Surgery                                                                                                                                 | 2021 | US     | US; Boston     | Retrospective, multi-center                                                                        | 45315 patients, 32 hospitals              | pediatrics, surgical, pediatric heart surgery                            | Pediatrics              | Pediatric surgical             | full care path                    | direct and indirect | provider | provider                                              | CHD-method standardized costs            | Absorption costing - unspecified/generic | Paper only     |                      | no                   |
| 9  | N. G. Thaker, D. Boyce-Fappiano, M. S. Ning, D. Pasalic, A. Guzman, G. Smith, E. B. Holliday, J. Incalcaterra, A. S. Gaudin, S. P. S. Tomicki, G. Dieguez, H. Latimer, P. Cockrum and G. Kim                                                                                                                   | Utilizing Lean Methodology and Time-Driven Activity-Based Costing Together: An Observational Pilot Study of Hip Replacement Surgery Utilizing a New Method to Study Value-Based Health Care   | 2021 | US     | US; Washington | single center, retrospective, surgeon comparison                                                   | 346 patients                              | surgical, orthopedic, hip replacement surgery, anterior hip arthroplasty | Surgical                | Orthopedic, arthroplasty       | full care path (surgical episode) | Direct and indirect | provider | provider                                              | TDABC                                    | Absorption costing - TDABC               | Paper only     |                      | yes see second sheet |
| 10 | W. Wang, E. Li, K. Campbell, A. McBride and S. D'Amato                                                                                                                                                                                                                                                         | Activity-Based Costing of Intensity-Modulated Proton versus Photon Therapy for Oropharyngeal Cancer                                                                                           | 2021 | US     | US; Texas      | single center, process mapping, matched sample                                                     | 50 patients (matched pairs)               | oncology, radiation oncology                                             | Oncology                |                                | partial care path                 | Direct and indirect | provider | provider                                              | TDABC                                    | Absorption costing - TDABC               | implemented    |                      | yes see second sheet |
| 11 | S. Tomicki, G. Dieguez, H. Latimer, P. Cockrum and G. Kim                                                                                                                                                                                                                                                      | Real-World Cost of Care for Commercially Insured versus Medicare Patients with Metastatic Pancreatic Cancer Who Received Guideline-Recommended Therapies                                      | 2021 | US     | US; various    |                                                                                                    | oncology, metastatic pancreatic cancer    | Oncology                                                                 |                         | full care path                 | Direct and indirect               | payer               | payer    | none; charges                                         | Charges/Reimbursements-based             | N/A                                      | charges        | no                   |                      |
| 12 | K. L. Wise, H. R. Parikh, B. Okelana, A. J. Only, M. Reams, A. Harrison, J. Braman, E. Craig and B. P. Cunningham                                                                                                                                                                                              | Economic Analysis on Adoption of Biosimilar Granulocyte Colony-Stimulating Factors in Patients With Nonmyeloid Cancer at Risk of Febrile Neutropenia Within the Oncology Care Model Framework | 2021 | US     | US; New Jersey |                                                                                                    | oncology, Nonmyeloid Cancer               | Oncology                                                                 |                         | partial care path              | Direct                            | provider            | provider | direct costs                                          | Direct costing                           | N/A                                      |                | no                   |                      |
| 13 | C. Iloabachi, N. Dwibedi, T. LeMasters, C. Shen, A. Ladani and U. Sambamoorthi                                                                                                                                                                                                                                 | Measurement of value in rotator cuff repair: patient-level value analysis for the 1-year episode of care                                                                                      | 2022 | US     | US; Minnesota  | single center, retrospective, process mapping                                                      | 396 patients                              | orthopedic, surgical, rotator cuff repair                                | Surgical                | Orthopedic rotator cuff repair | full care path                    | Direct and indirect | provider | provider                                              | TDABC                                    | Absorption costing - TDABC               | unspecified    |                      | yes see second sheet |
| 14 | C. Iloabachi, N. Dwibedi, T. LeMasters, C. Shen, A. Ladani and U. Sambamoorthi                                                                                                                                                                                                                                 | Low-value care and excess out-of-pocket expenditure among older adults with incident cancer – A machine learning approach                                                                     | 2021 | US     | US; various    |                                                                                                    | oncology, incident cancer                 | Oncology                                                                 |                         | full care path                 | Direct                            | patient             | patient  | total out of pocket expenditures (SEER data)          | Charges/Reimbursements-based patient OoO | N/A                                      |                | no                   |                      |

|                                                                                                                                                                              |                                                                                                                                                            |      |           |                    |                                                                 |                                                                |                                                                                      |                             |                          |                     |                     |                  |                                                      |                                       |                                           |                                                |                      |                      |
|------------------------------------------------------------------------------------------------------------------------------------------------------------------------------|------------------------------------------------------------------------------------------------------------------------------------------------------------|------|-----------|--------------------|-----------------------------------------------------------------|----------------------------------------------------------------|--------------------------------------------------------------------------------------|-----------------------------|--------------------------|---------------------|---------------------|------------------|------------------------------------------------------|---------------------------------------|-------------------------------------------|------------------------------------------------|----------------------|----------------------|
| N. Seyidova, A. D. Chen, D. del Valle, D. Chi, R. P. Cauley, B. T. Lee and S. J. Lin                                                                                         | Nationwide cost variation for lower extremity flap reconstruction                                                                                          | 2021 | US        | US; various        |                                                                 | lower extremity flap reconstruction, surgical, plastic surgery | Surgical                                                                             | Plastic surgery             | full care path           | Direct and indirect | provider (proxy)    | payer            | none; charges, transformed with cost-to-charge ratio | Charges/Reimbursement t-based proxy   | N/A                                       | charges, transformed with cost-to-charge ratio | no                   |                      |
| A. Jacir, D. Mendoza, E. Dean and H. Gritlow                                                                                                                                 | The cost of care during times of COVID: Case study of TDABC and minimum utilization cost analysis in a medicare advantage population                       | 2021 | US        | US; Florida        | single center, process mapping, case study                      | case study, telehealth visits                                  | Covid                                                                                | Infectious disease          | full care path           | Direct and indirect | provider            | provider         | TDABC                                                | Absorption costing - TDABC            | unspecified                               |                                                | no                   |                      |
| D. Fürstenau, H. Hancke, C. Spies, T. Walz, K. Schewina, M. Hüft, R. Müggeli and F. Balzer                                                                                   | Tackling the frailty burden with an integrative value-based approach: results from a mixed-methods study                                                   | 2021 | Germany   | Germany            |                                                                 |                                                                | surgical, perioperative process                                                      | Surgical                    | other                    | partial care path   | unspecified         | provider         | provider                                             | bottom-up clinical costing approach   | Unspecified                               | N/A                                            | no                   |                      |
| J. F. Buehl, A. N. Flaris, S. Raju, A. Haach, M. Darden and G. G. Parker                                                                                                     | Long-Term Outcomes in Complex Abdominal Wall Reconstruction Repaired with Absorbable Biologic Polymer Scaffold (Poly-4-Hydroxybutyrate)                    | 2021 | US        | US; North Carolina |                                                                 |                                                                | Surgical, abdominal wall reconstruction, reherniation, complex abdominal wall hernia | Surgical                    | Abdominal                | partial care path   | Direct              | payer            | payer                                                | none; charges                         | Charges/Reimbursement t-based             | N/A                                            | no                   |                      |
| V. J. Siu, T. Varkey, U. N. Khan, J. B. Ding and S. Gandhi                                                                                                                   | Lend Me a Hand: A Value-Based Care Case Study on Pan Plexopathy of Unknown Origin                                                                          | 2021 | US        | US; Texas          |                                                                 |                                                                | pan plexopathy, neurology, brachial plexus injury                                    | Neurology                   |                          | unspecified         | Direct              | patient          | patient                                              | out of pocket costs to patient        | Charges/Reimbursement t-based patient O&O | N/A                                            | no                   |                      |
| J. B. Kuleja, M. A. Seif, M. W. Mery, J. R. Incalcaterra, A. M. Kamat, C. P. Dinney, J. B. Shah, T. W. Feeley and N. Navai                                                   | Utilizing time-driven activity-based costing to determine open radical cystectomy and ileal conduit surgical episode cost drivers                          | 2021 | US        | US; Texas          | single center, retrospective, process mapping                   | 100 patients                                                   | open radical cystectomy, urology, oncology, bladder cancer                           | Oncology                    |                          | full care path      | Direct and indirect | provider         | provider                                             | TDABC                                 | Absorption costing - TDABC                | Paper only                                     | yes see second sheet |                      |
| King, B. C. Richardson, T. Patel, R. M. Lee, H. C. Bamat, N. A. Hall, M. Schabas, L. L. L. Fernando-Campan, A. Gust, A. Hsueh, A. Tran-Duy, M. Kirk, P. Brooks and J. Knight | Prioritization framework for improving the value of care for very low birth weight and very preterm infants                                                | 2021 | US        | US; Texas          | Retrospective cohort, multi center                              | 26098 preterm or low birth weight infants                      | Preterm infants, neonatal, perinatology, pediatrics                                  | Pediatrics                  | Pediatric Neonatal       | partial care path   | Direct and indirect | payer            | payer                                                | charges standardized across hospitals | Charges/Reimbursement t-based             | N/A                                            | charges              | no                   |
| H. Skibicki, M. Yayac, C. A. Krueger and P. M. Courtney                                                                                                                      | Target Price Adjustment for Hip Fractures Is Not Sufficient in the Bundled Payments for Care Improvement Initiative                                        | 2021 | Australia | Australia          | single center, retrospective, mixed methods observational study | 93 056 cases                                                   | emergency care, hospital acquired complications                                      | emergency care & acute care |                          | partial care path   | Direct and indirect | provider         | provider                                             | bottom-up clinical costing approach   | Absorption costing - unspecified/generic  | unspecified                                    |                      | yes see second sheet |
| D. Clewley, V. Iftikhar, M. E. Horn and D. I. Rhon                                                                                                                           | Do the Number of Visits and the Cost of Musculoskeletal Care Improve Outcomes? More May Not Be Better                                                      | 2020 | US        | US; Pennsylvania   |                                                                 |                                                                | arthroplasty, hip fractures, orthopedics                                             | Surgical                    | Orthopedic, arthroplasty | full care path      | Direct and indirect | payer            | payer                                                | none; charges                         | Charges/Reimbursement t-based             | N/A                                            | charges (EOC costs)  | no                   |
| B. Walker, L. Wilfong, J. Frytak and N. Robert                                                                                                                               | Practice patterns among oncologists participating in the oncology care model after three years                                                             | 2021 | US        | US; Louisiana      | Retrospective, clinical trial                                   | 98 patients                                                    | Subacromial pain syndrome                                                            | Pain medicine               |                          | partial care path   | Direct and indirect | payer            | payer                                                | none; reimbursements                  | Charges/Reimbursement t-based             | N/A                                            | reimbursements       | no                   |
| C. A. Krueger, M. Yayac, C. Vannello, J. Wilsman, M. S. Austin and P. M. Courtney                                                                                            | Are We at the Bottom? BPCI Programs Now Disincentivize Providers Who Maintain Quality Despite Caring for Increasingly Complex Patients                     | 2021 | US        | US; Pennsylvania   |                                                                 |                                                                | oncology, cancer                                                                     | Oncology                    |                          | full care path      | Direct and indirect | payer            | payer                                                | none; charges                         | Charges/Reimbursement t-based             | N/A                                            | charges              | no                   |
| B. S. Horton, J. D. Marland, H. S. West and J. D. Wylie                                                                                                                      | Transition to Telehealth Physical Therapy After Hip Arthroscopy for Femoroacetabular Impingement: A Pilot Study With Retrospective Matched-Cohort Analysis | 2021 | US        | US; Utah           | Pilot                                                           |                                                                | orthopedic, total hip arthroplasty, total knee arthroplasty                          | Surgical                    | Orthopedic, arthroplasty | partial care path   | Direct and indirect | payer            | payer                                                | none; reimbursement                   | Charges/Reimbursement t-based             | N/A                                            | reimbursement        | no                   |
| N. H. Nguyen, J. Luo, L. Ohno-Machado, W. J. Sandborn and S. Singh                                                                                                           | Burden and Outcomes of Fragmentation of Care in Hospitalized Patients With Inflammatory Bowel Diseases: A Nationally Representative Cohort                 | 2021 | US        | US; California     |                                                                 |                                                                | orthopedics, hip arthroscopy, physical therapy                                       | Orthopedic                  |                          | partial care path   | Direct and indirect | payer            | payer                                                | none; charges                         | Charges/Reimbursement t-based             | N/A                                            | charges              | no                   |
|                                                                                                                                                                              |                                                                                                                                                            |      |           |                    |                                                                 |                                                                | Gastroenterology, Inflammatory Bowel Diseases                                        | Internal Medicine           |                          | full care path      | Direct and indirect | provider (proxy) | payer                                                | none; charges HCUP data               | Charges/Reimbursement t-based             | N/A                                            | charges              | no                   |



|   |                                                                                                                         |                                                                                                                               |      |                 |                 |                                                                    |                                                 |                                                             |                  |                |                                           |                     |          |                                                   |                                    |                                          |                                               |                      |
|---|-------------------------------------------------------------------------------------------------------------------------|-------------------------------------------------------------------------------------------------------------------------------|------|-----------------|-----------------|--------------------------------------------------------------------|-------------------------------------------------|-------------------------------------------------------------|------------------|----------------|-------------------------------------------|---------------------|----------|---------------------------------------------------|------------------------------------|------------------------------------------|-----------------------------------------------|----------------------|
| 1 | Y. Sanaia, P. Downey,<br>R. Lyons, A. Nsaif, R.<br>J. Shemin and P.<br>Benharash                                        | Trends in utilization, mortality, and resource use after implantation of left ventricular assist devices in the United States | 2021 | US              | US; various     |                                                                    | cardiovascular, left ventricular assist devices | Surgical                                                    | Cardiac/Thoracic | full care path | Direct and indirect                       | provider (proxy)    | payer    | none; reimbursements, cost-charge-ratio, NIS data | Charges/Reimbursements-based proxy | N/A                                      | charges transformed with cost-to-charge ratio | no                   |
| 2 | Khanjow, A. N.<br>Wood, L. N.<br>Xie, R.<br>Theiss, L. M.<br>Hollis, R. H.<br>Hardiman, K. M.<br>Gonzalez, D. J.        | The impact of an enhanced recovery program (ERP) on the costs of colorectal surgery                                           | 2021 | US              | US; Alabama     | single center, retrospective                                       | 616 surgical cases                              | surgical, colorectal surgery                                | Surgical         | Colon/Rectal   | partial care path (full surgical episode) | Direct and indirect | provider | provider                                          | unspecified                        | Absorption costing - unspecified/generic | Paper only                                    | yes see second sheet |
| 3 | Jacobs, K.<br>Dewilde, T.<br>Vandoren, C.<br>Cardoen, B.<br>Vansteenkiste, N.<br>Scheys, L.<br>Roelofs, F.<br>Matar, D. | Variability in Hospital Costs of Adult Spinal Deformity Care                                                                  | 2020 | The Netherlands | The Netherlands | single center, retrospective                                       | 139 patients                                    | Surgical, spine, Adult Spinal Deformity                     | Surgical         | Spine          | full care path                            | Direct              | provider | provider                                          | ABC (excluding overheads)          | Absorption costing - ABC                 | Paper only                                    | yes see second sheet |
| 4 | Di Filippo, A.<br>Invento, A.<br>Radice, D.<br>Bucuta, M.<br>Bignardi, V.<br>Mazzanti, E.<br>Weir, T. B.                | Economic implications of ACOSOG Z0011 trial application into clinical practice at the European Institute of Oncology          | 2021 | Italy           | Italy           | single center, retrospective, clinical trial, compare pre and post | 3912 patients                                   | oncology, breast cancer, cancer, sentinel lymph node biopsy | Oncology         |                | partial care path (full surgical episode) | Direct and indirect | provider | provider                                          | TDABC                              | Absorption costing - TDABC               | implemented                                   | yes see second sheet |
| 5 | Usmani, M. F.<br>Camacho, J.<br>Sokolow, M.<br>Bruckner, J.<br>Jazini, E.<br>Lorenzini, L. T.                           | Effect of Surgical Setting on Cost and Hospital Reported Outcomes for Single-Level Anterior Cervical Discectomy and Fusion    | 2021 | US              | US; Maryland    | multi center, retrospective                                        | 301 patients                                    | Spine, surgical, Anterior Cervical Discectomy and Fusion    | Surgical         | Spine          | full care path                            | Direct and indirect | provider | provider                                          | unspecified                        | Absorption costing - unspecified/generic | Paper only                                    | no                   |

Peer review only



1  
2  
3  
4  
5  
6  
7  
8  
9  
10  
11  
12  
13  
14  
15  
16  
17  
18  
19  
20  
21  
22  
23  
24  
25  
26  
27  
28  
29  
30  
31  
32  
33  
34  
35  
36  
37  
38  
39  
40  
41  
42  
43  
44  
45  
46  
47  
48  
49  
50  
51  
52  
53  
54  
55  
56  
57  
58  
59  
60

For peer review only

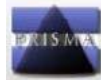

## PRISMA 2020 for Abstracts Checklist

| Section and Topic       | Item # | Checklist item                                                                                                                                                                                                                                                                                        | Reported (Yes/No) |
|-------------------------|--------|-------------------------------------------------------------------------------------------------------------------------------------------------------------------------------------------------------------------------------------------------------------------------------------------------------|-------------------|
| <b>TITLE</b>            |        |                                                                                                                                                                                                                                                                                                       |                   |
| Title                   | 1      | Identify the report as a systematic review.                                                                                                                                                                                                                                                           | yes               |
| <b>BACKGROUND</b>       |        |                                                                                                                                                                                                                                                                                                       |                   |
| Objectives              | 2      | Provide an explicit statement of the main objective(s) or question(s) the review addresses.                                                                                                                                                                                                           | yes               |
| <b>METHODS</b>          |        |                                                                                                                                                                                                                                                                                                       |                   |
| Eligibility criteria    | 3      | Specify the inclusion and exclusion criteria for the review.                                                                                                                                                                                                                                          | yes               |
| Information sources     | 4      | Specify the information sources (e.g. databases, registers) used to identify studies and the date when each was last searched.                                                                                                                                                                        | yes               |
| Risk of bias            | 5      | Specify the methods used to assess risk of bias in the included studies.                                                                                                                                                                                                                              | no                |
| Synthesis of results    | 6      | Specify the methods used to present and synthesise results.                                                                                                                                                                                                                                           | yes               |
| <b>RESULTS</b>          |        |                                                                                                                                                                                                                                                                                                       |                   |
| Included studies        | 7      | Give the total number of included studies and participants and summarise relevant characteristics of studies.                                                                                                                                                                                         | yes               |
| Synthesis of results    | 8      | Present results for main outcomes, preferably indicating the number of included studies and participants for each. If meta-analysis was done, report the summary estimate and confidence/credible interval. If comparing groups, indicate the direction of the effect (i.e. which group is favoured). | yes               |
| <b>DISCUSSION</b>       |        |                                                                                                                                                                                                                                                                                                       |                   |
| Limitations of evidence | 9      | Provide a brief summary of the limitations of the evidence included in the review (e.g. study risk of bias, inconsistency and imprecision).                                                                                                                                                           | yes               |
| Interpretation          | 10     | Provide a general interpretation of the results and important implications.                                                                                                                                                                                                                           | yes               |
| <b>OTHER</b>            |        |                                                                                                                                                                                                                                                                                                       |                   |
| Funding                 | 11     | Specify the primary source of funding for the review.                                                                                                                                                                                                                                                 | yes               |
| Registration            | 12     | Provide the register name and registration number.                                                                                                                                                                                                                                                    | N/A               |

From: Page MJ, McKenzie JE, Bossuyt PM, Boutron I, Hoffmann TC, Mulrow CD, et al. The PRISMA 2020 statement: an updated guideline for reporting systematic reviews. *BMJ* 2021;372:n71. doi: 10.1136/bmj.n71

For more information, visit: <http://www.prisma-statement.org/>

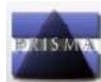

## PRISMA 2020 Checklist

| Section and Topic             | Item # | Checklist item                                                                                                                                                                                                                                                                                       | Location where item is reported |
|-------------------------------|--------|------------------------------------------------------------------------------------------------------------------------------------------------------------------------------------------------------------------------------------------------------------------------------------------------------|---------------------------------|
| <b>TITLE</b>                  |        |                                                                                                                                                                                                                                                                                                      |                                 |
| Title                         | 1      | Identify the report as a systematic review.                                                                                                                                                                                                                                                          | pg 0                            |
| <b>ABSTRACT</b>               |        |                                                                                                                                                                                                                                                                                                      |                                 |
| Abstract                      | 2      | See the PRISMA 2020 for Abstracts checklist.                                                                                                                                                                                                                                                         |                                 |
| <b>INTRODUCTION</b>           |        |                                                                                                                                                                                                                                                                                                      |                                 |
| Rationale                     | 3      | Describe the rationale for the review in the context of existing knowledge.                                                                                                                                                                                                                          | pg1-3                           |
| Objectives                    | 4      | Provide an explicit statement of the objective(s) or question(s) the review addresses.                                                                                                                                                                                                               | pg 3                            |
| <b>METHODS</b>                |        |                                                                                                                                                                                                                                                                                                      |                                 |
| Eligibility criteria          | 5      | Specify the inclusion and exclusion criteria for the review and how studies were grouped for the syntheses.                                                                                                                                                                                          | pg 4 and supplement             |
| Information sources           | 6      | Specify all databases, registers, websites, organisations, reference lists and other sources searched or consulted to identify studies. Specify the date when each source was last searched or consulted.                                                                                            | Pg 4 and supplement             |
| Search strategy               | 7      | Present the full search strategies for all databases, registers and websites, including any filters and limits used.                                                                                                                                                                                 | Supplement                      |
| Selection process             | 8      | Specify the methods used to decide whether a study met the inclusion criteria of the review, including how many reviewers screened each record and each report retrieved, whether they worked independently, and if applicable, details of automation tools used in the process.                     | pg 6                            |
| Data collection process       | 9      | Specify the methods used to collect data from reports, including how many reviewers collected data from each report, whether they worked independently, any processes for obtaining or confirming data from study investigators, and if applicable, details of automation tools used in the process. | pg 6                            |
| Data items                    | 10a    | List and define all outcomes for which data were sought. Specify whether all results that were compatible with each outcome domain in each study were sought (e.g. for all measures, time points, analyses), and if not, the methods used to decide which results to collect.                        | pg 4, supplement                |
|                               | 10b    | List and define all other variables for which data were sought (e.g. participant and intervention characteristics, funding sources). Describe any assumptions made about any missing or unclear information.                                                                                         | pg 4, supplement                |
| Study risk of bias assessment | 11     | Specify the methods used to assess risk of bias in the included studies, including details of the tool(s) used, how many reviewers assessed each study and whether they worked independently, and if applicable, details of automation tools used in the process.                                    | pg 4, supplement                |
| Effect measures               | 12     | Specify for each outcome the effect measure(s) (e.g. risk ratio, mean difference) used in the synthesis or presentation of results.                                                                                                                                                                  | pg 4                            |
| Synthesis methods             | 13a    | Describe the processes used to decide which studies were eligible for each synthesis (e.g. tabulating the study intervention characteristics and comparing against the planned groups for each synthesis (item #5)).                                                                                 | pg 8                            |
|                               | 13b    | Describe any methods required to prepare the data for presentation or synthesis, such as handling of missing summary statistics, or data conversions.                                                                                                                                                | N/A                             |
|                               | 13c    | Describe any methods used to tabulate or visually display results of individual studies and syntheses.                                                                                                                                                                                               | pg 8                            |
|                               | 13d    | Describe any methods used to synthesize results and provide a rationale for the choice(s). If meta-analysis was performed, describe the model(s), method(s) to identify the presence and extent of statistical heterogeneity, and software package(s) used.                                          | pg 4                            |
|                               | 13e    | Describe any methods used to explore possible causes of heterogeneity among study results (e.g. subgroup analysis, meta-regression).                                                                                                                                                                 | N/A                             |
|                               | 13f    | Describe any sensitivity analyses conducted to assess robustness of the synthesized results.                                                                                                                                                                                                         | N/A                             |
| Reporting bias assessment     | 14     | Describe any methods used to assess risk of bias due to missing results in a synthesis (arising from reporting biases).                                                                                                                                                                              | N/A, discussed pg 23            |
| Certainty assessment          | 15     | Describe any methods used to assess certainty (or confidence) in the body of evidence for an outcome.                                                                                                                                                                                                | N/A                             |

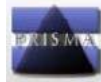

## PRISMA 2020 Checklist

1  
2  
3  
4  
5  
6  
7  
8  
9  
10  
11  
12  
13  
14  
15  
16  
17  
18  
19  
20  
21  
22  
23  
24  
25  
26  
27  
28  
29  
30  
31  
32  
33  
34  
35  
36  
37  
38  
39  
40  
41  
42  
43  
44  
45  
46  
47

| Section and Topic                              | Item # | Checklist item                                                                                                                                                                                                                                                                       | Location where item is reported |
|------------------------------------------------|--------|--------------------------------------------------------------------------------------------------------------------------------------------------------------------------------------------------------------------------------------------------------------------------------------|---------------------------------|
| <b>RESULTS</b>                                 |        |                                                                                                                                                                                                                                                                                      |                                 |
| Study selection                                | 16a    | Describe the results of the search and selection process, from the number of records identified in the search to the number of studies included in the review, ideally using a flow diagram.                                                                                         | pg 5,6, 7                       |
|                                                | 16b    | Cite studies that might appear to meet the inclusion criteria, but which were excluded, and explain why they were excluded.                                                                                                                                                          | pg 5 (flowchart)                |
| Study characteristics                          | 17     | Cite each included study and present its characteristics.                                                                                                                                                                                                                            | pg 7-14, and supplement         |
| Risk of bias in studies                        | 18     | Present assessments of risk of bias for each included study.                                                                                                                                                                                                                         | N/A                             |
| Results of individual studies                  | 19     | For all outcomes, present, for each study: (a) summary statistics for each group (where appropriate) and (b) an effect estimate and its precision (e.g. confidence/credible interval), ideally using structured tables or plots.                                                     | N/A                             |
| Results of syntheses                           | 20a    | For each synthesis, briefly summarise the characteristics and risk of bias among contributing studies.                                                                                                                                                                               | N/A                             |
|                                                | 20b    | Present results of all statistical syntheses conducted. If meta-analysis was done, present for each the summary estimate and its precision (e.g. confidence/credible interval) and measures of statistical heterogeneity. If comparing groups, describe the direction of the effect. | N/A                             |
|                                                | 20c    | Present results of all investigations of possible causes of heterogeneity among study results.                                                                                                                                                                                       | pg 7-9                          |
|                                                | 20d    | Present results of all sensitivity analyses conducted to assess the robustness of the synthesized results.                                                                                                                                                                           | N/A                             |
| Reporting biases                               | 21     | Present assessments of risk of bias due to missing results (arising from reporting biases) for each synthesis assessed.                                                                                                                                                              | N/A                             |
| Certainty of evidence                          | 22     | Present assessments of certainty (or confidence) in the body of evidence for each outcome assessed.                                                                                                                                                                                  | N/A                             |
| <b>DISCUSSION</b>                              |        |                                                                                                                                                                                                                                                                                      |                                 |
| Discussion                                     | 23a    | Provide a general interpretation of the results in the context of other evidence.                                                                                                                                                                                                    | pg 18-21                        |
|                                                | 23b    | Discuss any limitations of the evidence included in the review.                                                                                                                                                                                                                      | pg 21                           |
|                                                | 23c    | Discuss any limitations of the review processes used.                                                                                                                                                                                                                                | pg 21, 4                        |
|                                                | 23d    | Discuss implications of the results for practice, policy, and future research.                                                                                                                                                                                                       | pg 18-21                        |
| <b>OTHER INFORMATION</b>                       |        |                                                                                                                                                                                                                                                                                      |                                 |
| Registration and protocol                      | 24a    | Provide registration information for the review, including register name and registration number, or state that the review was not registered.                                                                                                                                       | pg 4                            |
|                                                | 24b    | Indicate where the review protocol can be accessed, or state that a protocol was not prepared.                                                                                                                                                                                       | supplement                      |
|                                                | 24c    | Describe and explain any amendments to information provided at registration or in the protocol.                                                                                                                                                                                      | N/A                             |
| Support                                        | 25     | Describe sources of financial or non-financial support for the review, and the role of the funders or sponsors in the review.                                                                                                                                                        | Funding statement               |
| Competing interests                            | 26     | Declare any competing interests of review authors.                                                                                                                                                                                                                                   | Author statement                |
| Availability of data, code and other materials | 27     | Report which of the following are publicly available and where they can be found: template data collection forms; data extracted from included studies; data used for all analyses; analytic code; any other materials used in the review.                                           | Data availability statement     |

From: Page MJ, McKenzie JE, Bossuyt PM, Boutron I, Hoffmann TC, Mulrow CD, et al. The PRISMA 2020 statement: an updated guideline for reporting systematic reviews. *BMJ* 2021;372:n71. doi: 10.1136/bmj.n71

For peer review only - <http://bmjopen.bmj.com/site/about/guidelines.xhtml>  
For more information, visit: <http://www.prisma-statement.org/>
