# Supplementary material for: Cost measurement in value-based healthcare: a systematic review
Source: PubMed Central journal article supplement — BMJ Open. 2022 Dec 7;12(12):e066568. doi: 10.1136/bmjopen-2022-066568 (PMC9730377; doi:10.1136/bmjopen-2022-066568), 2022-12-07
Supplement: bmjopen-2022-066568supp001.pdf [file bmjopen-2022-066568supp001.pdf]

**SUPPLEMENT DIGITAL CONTENT****1 Search strategy**

2003-1/1/2022

**embase.com**

((value-based OR valuebased) NOT ((value-based OR valuebased) NEXT/2 (insuran\* OR purchas\* OR pric\* OR reimburse\* OR contract\* OR payment\* OR partnership\*)) OR vbhc OR vb-hc):ab,ti) AND ('cost'/de OR 'health care cost'/de OR 'time driven activity based costing'/de OR 'activity based costing'/de OR (cost OR costs OR costing OR microcosting OR macrocosting OR tdabc OR abc OR (resource NEAR/3 assignment\*) OR (direct\* NEAR/3 estimat\*)):ab,ti) NOT (cost NEXT/1 (eval\* OR benefit\* OR effectiv\* OR utilit\* OR consequen\* OR minimi\* OR outcome\* OR reduc\* OR saving\*)):ti NOT [conference abstract]/lim AND ([dutch]/lim OR [English]/lim)

**Medline Ovid**

((value-based OR valuebased) NOT ((value-based OR valuebased) ADJ2 (insuran\* OR purchas\* OR pric\* OR reimburse\* OR contract\* OR payment\* OR partnership\*)) OR vbhc OR vb-hc).ab,ti.) AND ("Costs and Cost Analysis"/ OR Health Care Costs/ OR (cost OR costs OR costing OR microcosting OR macrocosting OR tdabc OR abc OR (resource ADJ3 assignment\*) OR (direct\* ADJ3 estimat\*)):ab,ti.) NOT (cost ADJ (eval\* OR benefit\* OR effectiv\* OR utilit\* OR consequen\* OR minimi\* OR outcome\* OR reduc\* OR saving\*)):ti. AND (dutch.la. OR english.la.)

**CINAHL EBSCOhost**

((TI(value-based OR valuebased) OR AB (value-based OR valuebased)) NOT (TI((value-based OR valuebased) N2 (insuran\* OR purchas\* OR pric\* OR reimburse\* OR contract\* OR payment\* OR partnership\*)) OR AB((value-based OR valuebased) N2 (insuran\* OR purchas\* OR pric\* OR reimburse\* OR contract\* OR payment\* OR partnership\*))) OR TI(vbhc OR vb-hc) OR AB(vbhc OR vb-hc))) AND ((MH "Costs and Cost Analysis" OR MH Health Care Costs OR MH Value-Based Health Care OR AB(costing OR microcosting OR macrocosting OR tdabc OR abc OR (resource N2 assignment\*) OR (direct\* N2 estimat\*))) OR (TI(cost OR costs) NOT TI(cost N1 (eval\* OR benefit\* OR effectiv\* OR utilit\* OR consequen\* OR minimi\* OR outcome\* OR reduc\* OR saving\*)))) AND LA(dutch OR english)

**Web of science**

TS=(((value-based OR valuebased) NOT ((value-based OR valuebased) NEAR/2 (insuran\* OR purchas\* OR pric\* OR reimburse\* OR contract\* OR payment\* OR partnership\*)) OR vbhc OR vb-hc)) AND ((cost OR costs OR costing OR microcosting OR macrocosting OR tdabc OR abc OR (resource NEAR/2 assignment\*) OR (direct\* NEAR/2 estimat\*))) AND (care OR health\* OR medicine OR clinical OR hospital\* OR surger\* OR therap\* OR patient\* OR oncolog\* OR drugs OR medication\* OR cancer\* OR pharmac\*)) NOT TI=(cost NEAR/1 (eval\* OR benefit\* OR effectiv\* OR utilit\* OR consequen\* OR minimi\* OR outcome\* OR reduc\* OR saving\*)) AND DT=(article) AND LA=(dutch OR english)

**SUPPLEMENT DIGITAL CONTENT****2 Inclusion/exclusion criteria, data extracted*****Eligibility criteria***

|                   |                                                                                                                    |
|-------------------|--------------------------------------------------------------------------------------------------------------------|
| Language          | English or Dutch                                                                                                   |
| Publication date  | Between 2003 and 1.1.2022                                                                                          |
| Research type     | Original, peer-reviewed, empirical research                                                                        |
| Terms             | Any variation of the terms “cost” and “value-based” in title or abstract                                           |
| Full text content | Costs of an intervention, treatment, care path, or other healthcare activity must have been measured or estimated. |

***Variables collected***

|                        |                                                                                                                                                                                                                                                                                                                                                                                                                                                                                                                                                             |
|------------------------|-------------------------------------------------------------------------------------------------------------------------------------------------------------------------------------------------------------------------------------------------------------------------------------------------------------------------------------------------------------------------------------------------------------------------------------------------------------------------------------------------------------------------------------------------------------|
| Descriptive            | Name, year published, authors, medical specialty, location                                                                                                                                                                                                                                                                                                                                                                                                                                                                                                  |
| Costs included         | Based on author reporting we classify studies into one of two categories: <ul style="list-style-type: none"> <li>• Direct costs only</li> <li>• Direct and indirect costs</li> </ul>                                                                                                                                                                                                                                                                                                                                                                        |
| Cost perspective       | We inductively classify studies into one or more categories: <ul style="list-style-type: none"> <li>• Provider costs (e.g. hospital)</li> <li>• Payer costs (reimbursements, charges, payments)</li> <li>• Patient costs (out-of-pocket costs to patient)</li> </ul>                                                                                                                                                                                                                                                                                        |
| Care path length       | We inductively classify studies into one of the following categories: <ul style="list-style-type: none"> <li>• Full care path</li> <li>• Full care path, full surgical episode (FSE)</li> <li>• Partial care path, full surgical episode (PSE)</li> <li>• Partial care path</li> </ul>                                                                                                                                                                                                                                                                      |
| Costing method label   | Costing method used, as labelled by the authors. These include traditional cost accounting, ABC, or ABC excluding overheads, TDABC, or TDABC with some cost categories omitted, microcosting, bottom-up clinical costing, reference pricing, relative value units or DRG costs, direct variable costs, or direct costs as an estimate of total cost, reimbursements, charges, claims, payments, and cost-to-charge ratio.                                                                                                                                   |
| Costing method applied | Costing method applied, based on method described by authors. We classified studies using management accounting literature (e.g., Zimmerman, 2015). We found the following categories represented in the literature. <ul style="list-style-type: none"> <li>• Direct costing</li> <li>• Absorption costing, which includes: <ul style="list-style-type: none"> <li>○ ABC</li> <li>○ TDABC.</li> <li>○ Other</li> </ul> </li> </ul> <p>Cases using reimbursements or charges to estimate costs were coded as ‘reimbursements’ or ‘cost-to-charge ratio’.</p> |
| Facilitating factors   | If the study discussed the consequences of the costing information generated, we collected the consequences. After we collected all consequences, we categorized these inductively.                                                                                                                                                                                                                                                                                                                                                                         |

*Note:* ABC: Activity-based costing; TDABC: Time-driven activity-based costing

**Supplement digital content table 1.** Eligibility criteria and data collected.

## SUPPLEMENT DIGITAL CONTENT

### 3 All studies included in RQ1

| Perspective     | Method                                     | n  | studies               |
|-----------------|--------------------------------------------|----|-----------------------|
| <i>Provider</i> | Direct costs only                          |    |                       |
|                 | Direct costing                             | 23 | [1–23]                |
|                 | Absorption costing                         |    |                       |
|                 | ABC                                        | 7  | [24–30]               |
|                 | TDABC                                      | 31 | [31–61]               |
|                 | Other                                      | 47 | [62–108]              |
|                 | Not specified                              | 3  | [109–111]             |
| <i>Insurer</i>  | Charges & reimbursements                   |    |                       |
|                 | Charges, reimbursements, claims            | 81 | [23,39,112–190]       |
|                 | Charges adjusted with cost-to charge ratio | 25 | [108,191–214]         |
| <i>Patient</i>  | Out-of-pocket costs to patient             | 5  | [106,126,130,215,216] |

*Note:* Total number of studies here is 222; seven studies measure two cost types[23,38,39,106,108,126,130]. Studies are classified based on actual costs included and methods described, not necessarily the labels used by authors.

**Supplement digital content table 2.** Overview of cost measurement methods used in value-based healthcare with references

#### References of all studies included in research question 1

*Reference numbers start at 1, these differ from the manuscript.*

- 1 Chatfield SC, Volpicelli FM, Adler NM, *et al.* Bending the cost curve: Time series analysis of a value transformation programme at an academic medical centre. *BMJ Qual Saf* 2019;**28**:449–58.
- 2 Featherall J, Brigati DP, Arney AN, *et al.* Effects of a Total Knee Arthroplasty Care Pathway on Cost, Quality, and Patient Experience: Toward Measuring the Triple Aim. *J Arthroplasty* 2019;**34**:2561–8.
- 3 Karns MR, Jones DL, Todd DC, *et al.* Patient- and Procedure-Specific Variables Driving Total Direct Costs of Outpatient Anterior Cruciate Ligament Reconstruction. *Orthop J Sports Med* 2018;**6**:2325967118788543.
- 4 Tan RYC, Met-Domestici M, Zhou K, *et al.* Using quality improvement methods and time-driven activity-based costing to improve value-based cancer care delivery at a Cancer Genetics clinic. *J Oncol Pract* 2016;**12**:e320–31.
- 5 Ravikumar TS, Sharma C, Marini C, *et al.* A validated value-based model to improve hospital-wide perioperative outcomes: Adaptability to combined medical/surgical inpatient cohorts. *Ann Surg* 2010;**252**:486–96.

- 6 Fortmann AL, Walker C, Barger K, *et al.* Care Team Integration in Primary Care Improves One-Year Clinical and Financial Outcomes in Diabetes: A Case for Value-Based Care. *Popul Health Manag* 2020;**23**:467–75.
- 7 Ryan SP, Plate JF, Black CS, *et al.* Value-Based Care Has Not Resulted in Biased Patient Selection: Analysis of a Single Center’s Experience in the Care for Joint Replacement Bundle. *J Arthroplasty* 2019;**34**:1872–5.
- 8 Plate JF, Ryan SP, Black CS, *et al.* No Changes in Patient Selection and Value-Based Metrics for Total Hip Arthroplasty After Comprehensive Care for Joint Replacement Bundle Implementation at a Single Center. *J Arthroplasty* 2019;**34**:1581–4.
- 9 Jakovljevic M, Zugic A, Rankovic A, *et al.* Radiation therapy remains the key cost driver of oncology inpatient treatment. *J Med Econ* 2015;**18**:29–36.
- 10 Siu A, Patel J, Prentice HA, *et al.* A Cost Analysis of Regional Versus General Anesthesia for Carotid Endarterectomy. *Ann Vasc Surg* 2017;**39**:189–94.
- 11 Monroe GR, Frederix GW, Savelberg SMC, *et al.* Effectiveness of whole-exome sequencing and costs of the traditional diagnostic trajectory in children with intellectual disability. *Genet Med* 2016;**18**:949–56.
- 12 Lott A, Haglin J, Saleh H, *et al.* Using a Validated Middle-Age and Geriatric Risk Tool to Identify Early (<48 Hours) Hospital Mortality and Associated Cost of Care. *J Orthop Trauma* 2018;**32**:349–53.
- 13 Reilly CA, Doughty HP, Werth PM, *et al.* Creating a Value Dashboard for Orthopaedic Surgical Procedures. *J Bone Joint Surg Am* 2020;**102**:1849–56.
- 14 Konda SR, Lott A, Egol KA. The Coming Hip and Femur Fracture Bundle: A New Inpatient Risk Stratification Tool for Care Providers. *Geriatr Orthop Surg Rehabil* 2018;**9**:215145931879531.
- 15 Cremins M, Vellanky S, McCann G, *et al.* Considering healthcare value and associated risk factors with postoperative urinary retention after elective laminectomy. *Spine J* 2020;**20**:701–7.
- 16 Edholm K, Lappé K, Kukhareva P, *et al.* Reducing Diabetic Ketoacidosis Intensive Care Unit Admissions Through an Electronic Health Record-Driven, Standardized Care Pathway. *J Healthc Qual* 2020;**42**:e66–74.
- 17 Keating CL, Dixon JB, Moodie ML, *et al.* Cost-Efficacy of Surgically Induced Weight Loss for the Management of Type 2 Diabetes A randomized controlled trial. *Diabetes Care* 2009;**32**:580–4.
- 18 Feizpour CA, Patel, Syed MA, *et al.* Enhanced recovery in liver transplantation: A value-based approach to complex surgical care. *Surgery* 2021;**170**:1830–7.

- 19 Gillis HC, Dolan K, Sargel CL, *et al.* A quality improvement approach to influence value-based mucolytic use in the PICU. *Pediatr Qual Saf* 2021;**6**:e438.
- 20 Konda SR, Johnson JR, Dedhia N, *et al.* Can We Stratify Quality and Cost for Older Patients With Proximal and Midshaft Humerus Fractures? *Geriatr Orthop Surg Rehabil* 2021;**12**:2151459321992742.
- 21 Panda N, Shagabayeva L, Comrie CE, *et al.* Drivers of Cost Associated With Minimally Invasive Esophagectomy. *Ann Thorac Surg* 2022;**113**:264–70.
- 22 Wang W, Li E, Campbell K, *et al.* Economic analysis on adoption of biosimilar granulocyte colony-stimulating factors in patients with nonmyeloid cancer at risk of febrile neutropenia within the Oncology Care Model framework. *JCO Oncol Pract* 2021;**17**:e1139–49.
- 23 Gray CF, Prieto HA, Deen JT, *et al.* Bundled Payment Creep: Institutional Redesign for Primary Arthroplasty Positively Affects Revision Arthroplasty. *J Arthroplasty* 2019;**34**:206–10.
- 24 Wise, Blaschke BL, Parikh HR, *et al.* Variation of the Inpatient Cost of Care in the Treatment of Isolated Geriatric Intertrochanteric Hip Fractures. *Geriatr Orthop Surg Rehabil* 2020;**11**. doi:10.1177/2151459320976533
- 25 McLaughlin N, Upadhyaya P, Buxey F, *et al.* Value-based neurosurgery: measuring and reducing the cost of microvascular decompression surgery. *J Neurosurg* 2014;**121**:700–8.
- 26 Abbott MM, Meara JG. A microcosting approach for isolated, unilateral cleft lip care in the first year of life. *Plast Reconstr Surg* 2011;**127**:333–9.
- 27 McLaughlin N, Martin NA, Upadhyaya P, *et al.* Assessing the cost of contemporary pituitary care. *Neurosurg Focus* 2014;**37**:E7.
- 28 Vanni F, Foglia E, Pennestri F, *et al.* Introducing enhanced recovery after surgery in a high-volume orthopaedic hospital: a health technology assessment. *BMC Health Serv Res* 2020;**20**:773.
- 29 Jacobs K, Dewilde T, Vandoren C, *et al.* Variability in hospital costs of Adult Spinal Deformity care. *Spine* 2020;**45**:1221–8.
- 30 Kaul S, Korgenski EK, Ying J, *et al.* A retrospective analysis of treatment-related hospitalization costs of pediatric, adolescent, and young adult acute lymphoblastic leukemia. *Cancer Med* 2016;**5**:221–9.
- 31 Etges, Cruz LN, Schlatter R, *et al.* Time-driven activity-based costing as a strategy to increase efficiency: An analyses of interventional coronary procedures. *Int J Health Plann Manage* Published Online First: 9 September 2021. doi:10.1002/hpm.3320
- 32 Martin JA, Mayhew CR, Morris AJ, *et al.* Using Time-Driven Activity-Based Costing as a Key Component of the Value Platform: A Pilot Analysis of Colonoscopy, Aortic Valve Replacement and Carpal Tunnel Release Procedures. *J Clin Med Res* 2018;**10**:314–20.

- 33 Bodar YJL, Srinivasan AK, Shah AS, *et al.* Time-Driven activity-based costing identifies opportunities for process efficiency and cost optimization for robot-assisted laparoscopic pyeloplasty. *J Pediatr Urol* 2020;**16**:460.e1-460.e10.
- 34 French KE, Guzman AB, Rubio AC, *et al.* Value based care and bundled payments: Anesthesia care costs for outpatient oncology surgery using time-driven activity-based costing. *Healthc (Amst)* 2016;**4**:173–80.
- 35 Isaacson D, Ahmad T, Metzler I, *et al.* Defining the Costs of Reusable Flexible Ureteroscope Reprocessing Using Time-Driven Activity-Based Costing. *J Endourol* 2017;**31**:1026–31.
- 36 Ilg AM, Laviana AA, Kamrava M, *et al.* Time-driven activity-based costing of low-dose-rate and high-dose-rate brachytherapy for low-risk prostate cancer. *Brachytherapy* 2016;**15**:760–7.
- 37 Dziemianowicz M, Burmeister J, Dominello M. Examining the Financial Impact of Altered Fractionation in Breast Cancer: An Analysis Using Time-Driven Activity-Based Costing. *Pract Radiat Oncol* 2021;**11**:245–51.
- 38 Fang, Shaker J, Drew JM, *et al.* The Cost of Hip and Knee Revision Arthroplasty by Diagnosis-Related Groups: Comparing Time-Driven Activity-Based Costing and Traditional Accounting. *J Arthroplasty* 2021;**36**:2674-2679.e2673.
- 39 Fang, Shaker J, Hart P-A, *et al.* Variation in the profit margin for different types of total joint arthroplasty. *J Bone Joint Surg Am* 2021;**Publish Ahead of Print**. doi:10.2106/JBJS.21.00223
- 40 Ahluwalia R, Cook J, Raheman F, *et al.* Improving the efficiency of ankle fracture care through home care and day-surgery units: Delivering safe surgery on a value-based healthcare model. *Surgeon* Published Online First: November 2020. doi:10.1016/j.surge.2020.08.004
- 41 Wise KL, Parikh HR, Okelana B, *et al.* Measurement of value in rotator cuff repair: patient-level value analysis for the 1-year episode of care. *J Shoulder Elbow Surg* 2022;**31**:72–80.
- 42 Hernandez A, Kaplan RS, Witkowski ML, *et al.* Navy Medicine Introduces Value-Based Health Care. *Health Aff* 2019;**38**:1393–400.
- 43 Ning MS, Venkatesan AM, Stafford RJ, *et al.* Developing an intraoperative 3T MRI-guided brachytherapy program within a diagnostic imaging suite: Methods, process workflow, and value-based analysis. *Brachytherapy* 2020;**19**:427–37.
- 44 Yu YR, Abbas PI, Smith CM, *et al.* Time-driven activity-based costing: A dynamic value assessment model in pediatric appendicitis. *J Pediatr Surg* 2017;**52**:1045–9.
- 45 Basto J, Chahal R, Riedel B. Time-driven activity-based costing to model the utility of parallel induction redesign in high-turnover operating lists. *Healthc Pap* 2019;**7**. doi:10.1016/j.hjdsi.2019.01.003

- 46 McCreary DL, Dugarte AJ, Vang S, *et al.* Patient-Level Value Analysis: An Innovative Approach to Optimize Care Delivery. *J Orthop Trauma* 2019;**33**:S49–52.
- 47 Caloway C, Yamasaki A, Callans KM, *et al.* Quantifying the benefits from a care coordination program for tracheostomy placement in neonates. *Int J Pediatr Otorhinolaryngol* 2020;**134**. doi:10.1016/j.ijporl.2020.110025
- 48 Ahluwalia R, Vainieri E, Tam J, *et al.* Surgical Diabetic Foot Debridement: Improving Training and Practice Utilizing the Traffic Light Principle. *Int J Low Extrem Wounds* 2019;**18**:279–86.
- 49 Kaplan AL, Agarwal N, Setlur NP, *et al.* Measuring the cost of care in benign prostatic hyperplasia using time-driven activity-based costing (TDABC). *Healthcare*. 2015;**3**:43–8. doi:10.1016/j.hjdsi.2014.09.007
- 50 Kurt P, Saban M, Cankaya F, *et al.* Time-Driven Activity-Based Costing in the Ophthalmology Department of State Hospital: a Case Study. *Fresenius Environ Bull* 2019;**28**:2754–70.
- 51 Alibrahim A, Abdulsalam Y, Al Mutawa S, *et al.* Towards value-based healthcare: Establishing baseline pharmacy care costs for diabetes management. *Int J Health Plann Manage* 2022;**37**:790–803.
- 52 Fang C, Hagar A, Gordon M, *et al.* Differences in Hospital Costs among Octogenarians and Nonagenarians Following Primary Total Joint Arthroplasty. *Geriatrics* 2021;**6**:26.
- 53 Fang C, Pagani N, Gordon M, *et al.* Episode-of-Care Costs for Revision Total Joint Arthroplasties by Decadal Age Groups. *Geriatrics* 2021;**6**:49.
- 54 Ganske IM, Sanchez K, Le E, *et al.* Time-Driven, Activity-Based Costing of Presurgical Infant Orthopedics: A Critical Component of Establishing Value of Latham Appliance and Nasoalveolar Molding. *Plastic & Reconstructive Surgery* 2021;**147**:444–54.
- 55 McClintock TR, Friedlander DF, Feng AY, *et al.* Determining Variable Costs in the Acute Urolithiasis Cycle of Care Through Time-Driven Activity-Based Costing. *Urology* 2021;**157**:107–13.
- 56 Sethi RK, Pumpian RP, Drolet CE, *et al.* Utilizing Lean Methodology and Time-Driven Activity-Based Costing Together: An Observational Pilot Study of Hip Replacement Surgery Utilizing a New Method to Study Value-Based Health Care. *J Bone Joint Surg Am* Published Online First: 14 October 2021. doi:10.2106/JBJS.21.00129
- 57 Thaker NG, Boyce-Fappiano D, Ning, *et al.* Activity-Based Costing of Intensity-Modulated Proton versus Photon Therapy for Oropharyngeal Cancer. *International Journal of Particle Therapy* 2021;**8**:374–82.
- 58 Kukreja JB, Seif MA, Mery MW, *et al.* Utilizing time-driven activity-based costing to determine open radical cystectomy and ileal conduit surgical episode cost drivers. *Urologic Oncology: Seminars and Original Investigations* 2021;**39**:237.e1-237.e5.

- 59 Mattar D, Di Filippo A, Invento A, *et al.* Economic implications of ACOSOG Z0011 trial application into clinical practice at the European Institute of Oncology. *Eur J Surg Oncol* 2021;**47**:2499–505.
- 60 McLaughlin N, Burke MA, Setlur NP, *et al.* Time-driven activity-based costing: a driver for provider engagement in costing activities and redesign initiatives. *Neurosurg Focus* 2014;**37**:E3.
- 61 Jacir A, Mendoza D, Dean E. The cost of care during times of COVID: Case study of TDABC and minimum utilization cost analysis in a medicare advantage population. *Journal of Health Care* 2021;**48**.<http://www.healthfinancejournal.com/index.php/johcf/article/view/264>
- 62 Danilyants N, MacKoul P, van der Does L, *et al.* A value-based evaluation of minimally invasive hysterectomy approaches. *Gynecol Surg* 2019;**16**:5.
- 63 Parra E, Arenas MD, Alonso M, *et al.* Assessing value-based health care delivery for haemodialysis. *J Eval Clin Pract* 2017;**23**:477–85.
- 64 Danilyants N, MacKoul P, Baxi R, *et al.* Value-based assessment of hysterectomy approaches. *J Obstet Gynaecol Res* 2019;**45**:389–98.
- 65 Lenfant L, Sawczyn G, Kim S, *et al.* Single-institution Cost Comparison: Single-port Versus Multiport Robotic Prostatectomy. *European Urology Focus* Published Online First: 2020. doi:10.1016/j.euf.2020.06.010
- 66 Robinson JR, Carter NH, Gibson C, *et al.* Improving the value of care for appendectomy through an individual surgeon-specific approach. *J Pediatr Surg* 2018;**53**:1181–6.
- 67 Bueno H, Bernal JL, Jimenez-Jimenez V, *et al.* The Clinical outcomes, healthcare resource utilization, and related costs (COHERENT) model. Application in heart failure patients. *Rev Esp Cardiol* Published Online First: 20 October 2021. doi:10.1016/j.rec.2021.08.009
- 68 Casey M, Perera D, Enticott J, *et al.* High utilisers of emergency departments: the profile and journey of patients with mental health issues. *Int J Psychiatry Clin Pract* 2021;**25**:316–24.
- 69 Cohen RV, Nishikawa AM, Ribeiro RA, *et al.* Surgical Management of Obesity in Brazil: Proposal for a Value-Based Healthcare Model and Preliminary Results. *Value in Health Regional Issues* 2021;**26**:10–4.
- 70 Hennink SD, Hofland N, Gopie JP, *et al.* Value-based healthcare in Lynch syndrome. *Fam Cancer* 2013;**12**:347–54.
- 71 Medbery RL, Chadid TS, Sweeney JF, *et al.* Laparoscopic vs open right hepatectomy: A value-based analysis. *J Am Coll Surg* 2014;**218**:929–39.
- 72 Gabriel L, Casey J, Gee M, *et al.* Value-based healthcare analysis of joint replacement surgery for patients with primary hip osteoarthritis. *BMJ Open Quality* 2019;**8**:e000549.



- 73 Ionov MV, Zhukova OV, Yudina YS, *et al.* Value-based approach to blood pressure telemonitoring and remote counseling in hypertensive patients. *Blood Press* 2021;**30**:20–30.
- 74 Goretti G, Marinari GM, Vanni E, *et al.* Value-Based Healthcare and Enhanced Recovery After Surgery Implementation in a High-Volume Bariatric Center in Italy. *Obes Surg* 2020;**30**:2519–27.
- 75 Konda SR, Lott A, Egol KA. Development of a Value-based Algorithm for Inpatient Triage of Elderly Hip Fracture Patients. *J Am Acad Orthop Surg* 2020;**28**:e566–72.
- 76 Verberne WR, Dijkers J, Kelder JC, *et al.* Value-based evaluation of dialysis versus conservative care in older patients with advanced chronic kidney disease: A cohort study. *BMC Nephrol* 2018;**19**. doi:10.1186/s12882-018-1004-4
- 77 Hersh EH, Yaeger KA, Neifert SN, *et al.* Patterns of health care costs due to external ventricular drain infections. *World Neurosurg* 2019;**128**:e31–7.
- 78 Meara JG, Hughes CD, Sanchez K, *et al.* Optimal Outcomes Reporting (OOR): A New Value-Based Metric for Outcome Reporting Following Cleft Palate Repair. *Cleft Palate Craniofac J* 2021;**58**:19–24.
- 79 Kirsch DB, Yang H, Maslow AL, *et al.* Association of Positive Airway Pressure Use With Acute Care Utilization and Costs. *J Clin Sleep Med* 2019;**15**:1243–50.
- 80 van Dijck JTJM, van Essen TA, Dijkman MD, *et al.* Functional and patient-reported outcome versus in-hospital costs after traumatic acute subdural hematoma (t-ASDH): a neurosurgical paradox? *Acta Neurochir* Published Online First: 2019. doi:10.1007/s00701-019-03878-5
- 81 Lentz TA, Rhon DI, George SZ. Predicting Opioid Use, Increased Health Care Utilization and High Costs for Musculoskeletal Pain: What Factors Mediate Pain Intensity and Disability? *Journal of Pain* 2020;**21**:135–45.
- 82 Silva-Velazco J, Dietz DW, Stocchi L, *et al.* Considering Value in Rectal Cancer Surgery: An Analysis of Costs and Outcomes Based on the Open, Laparoscopic, and Robotic Approach for Proctectomy. *Ann Surg* 2017;**265**:960–8.
- 83 Vuong B, Dehal A, Uppal A, *et al.* What Are the Most Significant Cost and Value Drivers for Pancreatic Resection in an Integrated Healthcare System? *J Am Coll Surg* 2018;**227**:45–53.
- 84 Chawla SS, Whitson AJ, Schiffman CJ, *et al.* Drivers of lower inpatient hospital costs and greater improvements in health-related quality of life for patients undergoing total shoulder and ream-and-run arthroplasty. *J Shoulder Elbow Surg* Published Online First: 2021. doi:10.1016/j.jse.2020.10.030
- 85 Peard L, Goodwin J, Hensley P, *et al.* Examining and Understanding Value: The Impact of Preoperative Characteristics, Intraoperative Variables, and Postoperative Complications on Cost of Robot-Assisted Laparoscopic Radical Prostatectomy. *J Endourol* 2019;**33**:541–8.

- 86 Harris AM, Hensley P, Goodwin J, *et al.* Examining and understanding value: The cost of preoperative characteristics, intraoperative variables and postoperative complications of minimally invasive partial nephrectomy. *Urol Pract* 2019;**6**:215–21.
- 87 Winegar AL, Jackson LW, Sambare TD, *et al.* A surgeon scorecard is associated with improved value in elective primary hip and knee arthroplasty. *Journal of Bone and Joint Surgery - American Volume* 2019;**101**:152–9.
- 88 Ramshaw B, Forman BR, Moore K, *et al.* Real-World Clinical Quality Improvement for Complex Abdominal Wall Reconstruction. *Surg Technol Int* 2017;**30**:155–64.
- 89 Heincelman M, Schumann SO, Riley J, *et al.* Identification of High Utilization Inpatients on Internal Medicine Services. *Am J Med Sci* 2016;**352**:63–70.
- 90 Ramly EP, Larentzakis A, Bohnen JD, *et al.* The financial impact of intraoperative adverse events in abdominal surgery. *Surgery* 2015;**158**:1382–8.
- 91 Geerdink TH, Haverlag R, van Veen RN, *et al.* [Direct discharge from the ED for patients with simple stable injuries: a Dutch pilot study]. *Ned Tijdschr Geneesk* 2020;**164**.<https://www.ncbi.nlm.nih.gov/pubmed/32391996>
- 92 Abdulla AG, Ituarte PH, Wiggins R, *et al.* Endocrine surgery as a model for value-based health care delivery. *Surg Neurol Int* 2012;**3**:163.
- 93 van der Meulen M, Zamanipoor Najafabadi AH, Lobatto DJ, *et al.* Healthcare utilization and costs among prolactinoma patients: a cross-sectional study and analysis of determinants. *Pituitary* 2021;**24**:79–95.
- 94 Lobatto DJ, Vliet Vlieland TPM, van den Hout WB, *et al.* Feasibility, safety, and outcomes of a stratified fast-track care trajectory in pituitary surgery. *Endocrine* 2020;**69**:175–87.
- 95 Jalilian H, Doshmangir L, Ajami S, *et al.* Economic burden of gastric cancer in the first six months after diagnosis. *Int J Pharm Healthc Mark* 2019;**13**:436–46.
- 96 Lobatto DJ, van den Hout WB, Najafabadi AHZ, *et al.* Healthcare utilization and costs among patients with non-functioning pituitary adenomas. *Endocrine* 2019;**64**:330–40.
- 97 Yanik JM, Bedard NA, Hanley JM, *et al.* Rapid Recovery Total Joint Arthroplasty is Safe, Efficient, and Cost-Effective in the Veterans Administration Setting. *J Arthroplasty* 2018;**33**:3138–42.
- 98 Weir TB, Usmani MF, Camacho J, *et al.* Effect of surgical setting on cost and hospital reported outcomes for single-level anterior cervical discectomy and fusion. *Int J Spine Surg* 2021;**15**:701–9.
- 99 Gálvez ACM, Sánchez FJ, Moreno CA, *et al.* Value-based healthcare in ostomies. *Int J Environ Res Public Health* 2020;**17**:1–15.

- 100 Burnhope E, Waring M, Guilder A, *et al.* A systematic approach towards implementing value-based health care in heart failure: Understandings from retrospective analysis methods in South London. *Health Serv Manage Res* Published Online First: 2020. doi:10.1177/0951484820971442
- 101 Kirsch DB, Yang H, Maslow AL, *et al.* Association of positive airway pressure use with acute care utilization and costs. *J Clin Sleep Med* 2019;**15**:1243–50.
- 102 Khanijow AN, Wood LN, Xie R, *et al.* The impact of an enhanced recovery program (ERP) on the costs of colorectal surgery. *Am J Surg* 2021;**222**:186–92.
- 103 Fernando-Canavan L, Gust A, Hsueh A, *et al.* Measuring the economic impact of hospital-acquired complications on an acute health service. *Aust Health Rev* 2021;**45**:135–42.
- 104 Pasquali SK, Thibault D, Hall M, *et al.* Evolving Cost-Quality Relationship in Pediatric Heart Surgery. *Ann Thorac Surg* Published Online First: 8 June 2021. doi:10.1016/j.athoracsur.2021.05.050
- 105 Negrini R, da Silva Ferreira RD, Guimaraes DZ. Value-based care in obstetrics: comparison between vaginal birth and caesarean section. *BMC Pregnancy Childbirth* 2021;**21**:333.
- 106 Islam MK, Ruths S, Jansen K, *et al.* Evaluating an integrated care pathway for frail elderly patients in Norway using multi-criteria decision analysis. *BMC Health Serv Res* 2021;**21**:1–16.
- 107 Fontebasso AM, Figueira S, Thavorn K, *et al.* Financial implications of trauma patients at a Canadian level 1 trauma center: a retrospective cohort study. *Trauma Surg Acute Care Open* 2020;**5**:e000568.
- 108 Robinson JR, Avritscher EBC, Gay JC, *et al.* Measuring the Value of a Clinical Practice Guideline for Children with Perforated Appendicitis. *Ann Surg* 2017;**266**:195–200.
- 109 Sun LL, Cao DY, Yang JX, *et al.* Value-based medicine analysis on loop electrosurgical excision procedure and CO2 laser vaporization for the treatment of cervical intraepithelial neoplasia 2. *J Obstet Gynaecol Res* 2012;**38**:1064–70.
- 110 Fürstenau D, Haneke H, Spies C, *et al.* Tackling the frailty burden with an integrative value-based approach: results from a mixed-methods study. *J Public Health* 2022;**30**:99–110.
- 111 Ebinger JE, Strauss CE, Garberich RR, *et al.* Value-based ST-segment-elevation myocardial infarction care using risk-guided triage and early discharge. *Circ Cardiovasc Qual Outcomes* 2018;**11**. doi:10.1161/CIRCOUTCOMES.118.004553
- 112 Jain N, Brock JL, Phillips FM, *et al.* Chronic preoperative opioid use is a risk factor for increased complications, resource use, and costs after cervical fusion. *Spine J* 2018;**18**:1989–98.

- 113 Rice-Townsend S, Barnes JN, Hall M, *et al.* Variation in practice and resource utilization associated with the diagnosis and management of appendicitis at freestanding children's hospitals: Implications for value-based comparative analysis. *Ann Surg* 2014;**259**:1228–34.
- 114 Burnett RA Iii, Yang J, Courtney PM, *et al.* Costs of unicompartmental compared with total knee arthroplasty : a matched cohort study over ten years. *Bone Joint J* 2021;**103-B**:23–31.
- 115 Cronin KJ, Mair SD, Hawk GS, *et al.* Increased Health Care Costs and Opioid Use in Patients with Anxiety and Depression Undergoing Rotator Cuff Repair. *Arthroscopy - Journal of Arthroscopic and Related Surgery* 2020;**36**:2655–60.
- 116 Robles AJ, Kornblith LZ, Hendrickson CM, *et al.* Health care utilization and the cost of posttraumatic acute respiratory distress syndrome care. *J Trauma Acute Care Surg* 2018;**85**:148–54.
- 117 Brown MM, Brown GC, Brown HC, *et al.* A Value-Based Medicine Analysis of Ranibizumab for the Treatment of Subfoveal Neovascular Macular Degeneration. *Ophthalmology* 2008;**115**:1039-1045.e5.
- 118 Chovanec KA, Arsene C, Beck A, *et al.* Why not home?: A study of the impact of an effort to reduce postacute expenditures. *Prof Case Manag* 2022;**27**:3–11.
- 119 Brown GC, Brown MM, Brown HC, *et al.* A Value-Based Medicine Comparison of Interventions for Subfoveal Neovascular Macular Degeneration. *Ophthalmology* 2007;**114**:1170–8.
- 120 van Deen WK, Spiro A, Burak Ozbay A, *et al.* The impact of value-based healthcare for inflammatory bowel diseases on healthcare utilization: a pilot study. *Eur J Gastroenterol Hepatol* 2017;**29**:331–7.
- 121 Annabathula R, Dugan A, Bhalla V, *et al.* Value-based assessment of implementing a Pulmonary Embolism Response Team (PERT). *J Thromb Thrombolysis* 2021;**51**:217–25.
- 122 Ennis RD, Parikh AB, Sanderson M, *et al.* Interpreting oncology care model data to drive value-based care: A prostate cancer analysis. *J Oncol Pract* 2019;**15**:E238–46.
- 123 Denny JC, Cyr DD, Witsell DL, *et al.* A pathway to value-based care of chronic rhinosinusitis using a claims database. *Laryngoscope Investigative Otolaryngology* 2019;**4**:193–206.
- 124 Peele P, Keyser D, Lovelace J, *et al.* Advancing Value-Based Population Health Management Through Payer-Provider Partnerships: Improving Outcomes for Children with Complex Conditions. *J Healthc Qual* 2018;**40**:e26–32.
- 125 Khullar OV, Jiang R, Force SD, *et al.* Transthoracic versus transhiatal resection for esophageal adenocarcinoma of the lower esophagus: A value-based comparison. *J Surg Oncol* 2015;**112**:517–23.

- 126 Ramirez MM, Brennan GP. Using the value-based care paradigm to compare physical therapy access to care models in cervical spine radiculopathy: a case report. *Physiother Theory Pract* 2020;**36**:1476–84.
- 127 Regan DK, Manoli A, Hutzler L, *et al.* Impact of Diabetes Mellitus on Surgical Quality Measures After Ankle Fracture Surgery: Implications for Value-Based Compensation and Pay for Performance. *J Orthop Trauma* 2015;**29**:e483–486.
- 128 Kadakia RJ, Ahearn BM, Tenenbaum S, *et al.* Costs Associated With Geriatric Ankle Fractures. *Foot Ankle Spec* 2017;**10**:26–30.
- 129 Barkley R, Soobader MJ, Wang J, *et al.* Reducing cancer costs through symptom management and triage pathways. *J Oncol Pract* 2019;**15**:E91–7.
- 130 Suidan RS, He W, Sun CC, *et al.* Total and out-of-pocket costs of different primary management strategies in ovarian cancer. *Am J Obstet Gynecol* 2019;**221**:136.e1–136.e9.
- 131 Hemmila MR, Cain-Nielsen AH, Wahl WL, *et al.* Regional collaborative quality improvement for trauma reduces complications and costs. *J Trauma Acute Care Surg* 2015;**78**:78–85.
- 132 AlAshqar A, Goktepe ME, Kilic GS, *et al.* Predictors of the cost of hysterectomy for benign indications. *J Gynecol Obstet Hum Reprod* 2021;**50**:101936.
- 133 Naghavi AO, Gonzalez RJ, Scott JG, *et al.* Staged reconstruction brachytherapy has lower overall cost in recurrent soft-tissue sarcoma. *J Contemp Brachytherapy* 2017;**9**:20–9.
- 134 Puvanesarajah V, Kirby DJ, Jain A, *et al.* Cost Variation of Anterior Cervical Fusions in Elderly Medicare Beneficiaries. *Spine* 2017;**42**:E1010–5.
- 135 Passias PG, Poorman GW, Bortz CA, *et al.* Predictors of adverse discharge disposition in adult spinal deformity and associated costs. *Spine J* 2018;**18**:1845–52.
- 136 Manriquez E, Mandelbaum A, Aguayo E, *et al.* Factors associated with high-cost hospitalizations in elderly ovarian cancer patients. *Gynecol Oncol* 2020;**159**:767–72.
- 137 Rocque GB, Pisu M, Jackson BE, *et al.* Resource Use and Medicare Costs During Lay Navigation for Geriatric Patients With Cancer. *JAMA Oncol* 2017;**3**:817–25.
- 138 Brixner D, Rubin DT, Mease P, *et al.* Patient support program increased medication adherence with lower total health care costs despite increased drug spending. *Journal of Managed Care and Specialty Pharmacy* 2019;**25**:770–9.
- 139 Alli VV, Zhang J, Telem DA. Impact of incisional hernia development following abdominal operations on total healthcare cost. *Surg Endosc* 2018;**32**:2381–6.
- 140 Thakore RV, Greenberg SE, Shi H, *et al.* Surgical site infection in orthopedic trauma: A case-control study evaluating risk factors and cost. *Journal of Clinical Orthopaedics and Trauma* 2015;**6**:220–6.

- 141 Smith BD, Jiang J, Shih YC, *et al.* Cost and complications of local therapies for early-stage breast cancer. *J Natl Cancer Inst* 2017;**109**. doi:10.1093/jnci/djw178
- 142 Klink AJ, Chmielowski B, Feinberg B, *et al.* Health care resource utilization and costs in first-line treatments for patients with metastatic melanoma in the United States. *Journal of Managed Care and Specialty Pharmacy* 2019;**25**:869–77.
- 143 Chotai S, Sivaganesan A, Parker SL, *et al.* Drivers of Variability in 90-Day Cost for Elective Anterior Cervical Discectomy and Fusion for Cervical Degenerative Disease. *Clin Neurosurg* 2018;**83**:898–904.
- 144 Ackerman RS, Hirschi M, Alford B, *et al.* Enhanced REVENUE after surgery? A cost-standardized enhanced recovery pathway for mastectomy decreases length of stay. *World J Surg* 2019;**43**:839–45.
- 145 Williams SB, Shan Y, Jazzar U, *et al.* Comparing Survival Outcomes and Costs Associated with Radical Cystectomy and Trimodal Therapy for Older Adults with Muscle-Invasive Bladder Cancer. *JAMA Surg* 2018;**153**:881–9.
- 146 Schilling PL, He J, Chen S, *et al.* Risk-Adjusted Cost Performance for 90-Day Total Hip Arthroplasty Episodes: Comparing US Hospitals Nationwide Before CJR. *J Arthroplasty* 2020;**35**:3452–63.
- 147 Ackerman SJ, Knight T, Wahl PM, *et al.* Health care utilization and costs following amplified versus non-amplified molecular probe testing for symptomatic patients with suspected vulvovaginitis: A us commercial payer population. *Clinicoecon Outcomes Res* 2019;**11**:179–89.
- 148 Patel MI, Ramirez D, Agajanian R, *et al.* Lay health worker-led cancer symptom screening intervention and the effect on patient-reported satisfaction, health status, health care use, and total costs: Results from a tri-part collaboration. *J Oncol Pract* 2020;**16**:E19–28.
- 149 Stearns LJ, Narang S, Albright RE, *et al.* Assessment of Health Care Utilization and Cost of Targeted Drug Delivery and Conventional Medical Management vs Conventional Medical Management Alone for Patients With Cancer-Related Pain. *JAMA Netw Open* 2019;**2**:e191549.
- 150 Skill NJ, Butler J, O'Brien DC, *et al.* Financial Burden of Liver Transplant vs Resection for Hepatocellular Carcinoma. *Transplant Proc* 2019;**51**:1907–12.
- 151 Karnuta JM, Navarro SM, Haeberle HS, *et al.* Predicting Inpatient Payments Prior to Lower Extremity Arthroplasty Using Deep Learning: Which Model Architecture Is Best? *J Arthroplasty* 2019;**34**:2235-2241.e1.
- 152 Ning MS, Palmer MB, Shah AK, *et al.* Three-Year Results of a Prospective Statewide Insurance Coverage Pilot for Proton Therapy: Stakeholder Collaboration Improves Patient Access to Care. *JCO Oncol Pract* 2020;**16**:e966–76.

- 153 Keller DS, Zhang J, Chand M. Opioid-free colorectal surgery: a method to improve patient & financial outcomes in surgery. *Surg Endosc* 2019;**33**:1959–66.
- 154 Rocque GB, Williams CP, Kenzik KM, *et al.* Where are the opportunities for reducing health care spending within alternative payment models? *J Oncol Pract* 2018;**14**:e375–83.
- 155 Sheetz KH, Kenney B, Dupree JM, *et al.* Targeting Value-Driven Quality Improvement for Laparoscopic Cholecystectomy in Michigan. *Ann Surg* 2019;**269**:127–32.
- 156 Zolin SJ, Tastaldi L, Alkhatib H, *et al.* Open retromuscular versus laparoscopic ventral hernia repair for medium-sized defects: where is the value? *Hernia* 2020;**24**:759–70.
- 157 Orhurhu V, Urits I, Olusunmade M, *et al.* Trends of Co-Morbid Depression in Hospitalized Patients with Failed Back Surgery Syndrome: An Analysis of the Nationwide Inpatient Sample. *Pain and Therapy* 2018;**7**:217–26.
- 158 Hollenbeck B, Hoffman MA, Tromanhauser SG. High-Volume Arthroplasty Centers Demonstrate Higher Composite Quality Scores and Enhanced Value: Perspective on Higher-Volume Hospitals Performing Arthroplasty from 2001 to 2011. *Journal of Bone and Joint Surgery - American Volume* 2020;**102**:362–7.
- 159 Loftus TJ, Rosenthal MD, Croft CA, *et al.* Effect of time to operation on value of care in acute care surgery. *World J Surg* 2018;**42**:2356–63.
- 160 Buell JF, Sigmon D, Ducoin C, *et al.* Initial Experience with Biologic Polymer Scaffold (Poly-4-hydroxybuturate) in Complex Abdominal Wall Reconstruction. *Ann Surg* 2017;**266**:185–8.
- 161 Jain N, Phillips FM, Shimer AL, *et al.* Surgeon Reimbursement Relative to Hospital Payments for Spinal Fusion: Trends From 10-year Medicare Analysis. *Spine* 2018;**43**:720–31.
- 162 Stull JD, Bhat SB, Kane JM, *et al.* Economic Burden of Inpatient Admission of Ankle Fractures. *Foot Ankle Int* 2017;**38**:997–1004.
- 163 Lewis RB, Hariri O, Elliott ME, *et al.* Financial Analysis of Closed Femur Fractures in 3- to 6-Year-Olds Treated with Immediate Spica Casting Versus Intramedullary Fixation. *Journal of Pediatric Orthopaedics* 2019;**39**:E114–9.
- 164 Murphy WS, Cheng T, Lin B, *et al.* Higher Volume Surgeons Have Lower Medicare Payments, Readmissions, and Mortality After THA. *Clin Orthop Relat Res* 2019;**477**:334–41.
- 165 King AM, Danagoulian S, Lynch M, *et al.* The Effect of a Medical Toxicology Inpatient Service in an Academic Tertiary Care Referral Center. *J Med Toxicol* 2019;**15**:12–21.
- 166 Click B, Lopez R, Arrigain S, *et al.* Shifting Cost-drivers of Health Care Expenditures in Inflammatory Bowel Disease. *Inflamm Bowel Dis* 2020;**26**:1268–75.

- 167 Padilla JA, Gabor JA, Ryan SP, *et al.* Total Hip Arthroplasty for Femoral Neck Fracture: The Economic Implications of Orthopedic Subspecialty Training. *J Arthroplasty* 2020;**35**:S101–6.
- 168 Pang J, Crawford K, Faraji F, *et al.* An Analysis of 1-Year Charges for Head and Neck Cancer: Targets for Value-Based Interventions. *Otolaryngol Head Neck Surg* 2020;**163**:546–53.
- 169 Patel MI, Ramirez D, Agajanian R, *et al.* Association of a Lay Health Worker Intervention With Symptom Burden, Survival, Health Care Use, and Total Costs Among Medicare Enrollees With Cancer. *JAMA Netw Open* 2020;**3**:e201023.
- 170 Thaci B, McGirt MJ, Ammerman JM, *et al.* Reduction of direct costs in high-risk lumbar discectomy patients during the 90-day post-operative period through annular closure. *Clinicoecon Outcomes Res* 2019;**11**:191–7.
- 171 Gupta P, Rettiganti M. Relationship of Hospital Costs With Mortality in Pediatric Critical Care: A Multi-Institutional Analysis. *Pediatr Crit Care Med* 2017;**18**:541–9.
- 172 Nelson AA, Pearce DJ, Fleischer AB, *et al.* Infliximab for inpatient psoriasis management - is there a role? *J Dermatolog Treat* 2005;**16**:314–8.
- 173 Zhang S, Vora M, Harris AHS, *et al.* Cost-Minimization Analysis of Open and Endoscopic Carpal Tunnel Release. *J Bone Joint Surg Am* 2016;**98**:1970–7.
- 174 Adenikinju A, Ranson R, Rettig SA, *et al.* Ability of a Risk Prediction Tool to Stratify Quality and Cost for Older Patients With Operative Distal Radius Fractures. *Geriatr Orthop Surg Rehabil* 2021;**12**:2151459321999634.
- 175 Baughman DJ, Waheed A, Khan MN, *et al.* Enhancing Value-Based Care With a Walk-in Clinic: A Primary Care Provider Intervention to Decrease Low Acuity Emergency Department Overutilization. *Cureus* 2021;**13**:e13284.
- 176 Berinstein JA, Cohen-Mekelburg SA, Greenberg GM, *et al.* A Care Coordination Intervention Improves Symptoms But Not Charges in High-Risk Patients With Inflammatory Bowel Disease. *Clinical Gastroenterology & Hepatology* Published Online First: 28 August 2021. doi:10.1016/j.cgh.2021.08.034
- 177 Beschloss A, Dicinidio C, Lombardi J, *et al.* Marked increase in Spinal Deformity Surgery throughout the United States. *Spine* 2021;**46**:1402–8.
- 178 Jang DW, Lee HJ, Chen PG, *et al.* Geographic variations in healthcare utilization and expenditure for chronic rhinosinusitis: A population-based approach. *Laryngoscope* 2021;**131**:2641–8.
- 179 Ko H, Brodke DS, Vanneman ME, *et al.* Is discretionary care associated with safety among Medicare beneficiaries undergoing spine surgery? *J Bone Joint Surg Am* 2021;**Public Ahead of Print**. doi:10.2106/JBJS.21.00389



- 180 Malik AT, Khan SN, Voskuil RT, *et al.* What is the value of undergoing surgery for spinal metastases at Dedicated Cancer Centers? *Clin Orthop Relat Res* 2021;**479**:1311–9.
- 181 Newman TV, Munshi KD, Neilson LM, *et al.* Health care utilization and costs associated with switching from DPP-4i to GLP-1RA or SGLT2i: an observational cohort study. *Journal of Managed Care & Specialty Pharmacy* 2021;**27**:435–43.
- 182 Tomicki S, Dieguez G, Latimer H, *et al.* Real-World Cost of Care for Commercially Insured versus Medicare Patients with Metastatic Pancreatic Cancer Who Received Guideline-Recommended Therapies. *American Health & Drug Benefits* 2021;**14**:70–8.
- 183 Buell JF, Flaris AN, Raju S, *et al.* Long-Term Outcomes in Complex Abdominal Wall Reconstruction Repaired With Absorbable Biologic Polymer Scaffold (Poly-4-Hydroxybutyrate). *Annals of Surgery Open* 2021;**2**:e032.
- 184 King BC, Richardson T, Patel RM, *et al.* Prioritization framework for improving the value of care for very low birth weight and very preterm infants. *J Perinatol* 2021;**41**:2463–73.
- 185 Skibicki H, Yayac M, Krueger CA, *et al.* Target price adjustment for hip fractures is not sufficient in the Bundled Payments for Care Improvement initiative. *J Arthroplasty* 2021;**36**:47–53.
- 186 Clewley D, Iftikhar Y, Horn ME, *et al.* Do the number of visits and the cost of musculoskeletal care improve outcomes? More may not be better. *J Orthop Sports Phys Ther* 2020;**50**:642–8.
- 187 Walker B, Wilfong L, Frytak J, *et al.* Practice patterns among oncologists participating in the oncology care model after three years. *J Cancer Policy* 2021;**29**:100294.
- 188 Krueger CA, Yayac M, Vannello C, *et al.* Are we at the bottom? BPCI programs now disincentivize providers who maintain quality despite caring for increasingly complex patients. *J Arthroplasty* 2021;**36**:13–8.
- 189 Horton BS, Marland JD, West HS, *et al.* Transition to telehealth physical therapy after hip arthroscopy for femoroacetabular impingement: A pilot study with retrospective matched-cohort analysis. *Orthop J Sports Med* 2021;**9**:2325967121997469.
- 190 Nguyen NH, Luo J, Ohno-Machado L, *et al.* Burden and outcomes of fragmentation of care in hospitalized patients with inflammatory bowel diseases: A nationally representative cohort. *Inflamm Bowel Dis* 2021;**27**:1026–34.
- 191 Gregory D, Scotti DJ, de Lissovoy G, *et al.* A value-based analysis of hemodynamic support strategies for high-risk heart failure patients undergoing a percutaneous coronary intervention. *Am Health Drug Benefits* 2013;**6**:88–99.
- 192 Schwartz DA, Shah AA, Zogg CK, *et al.* Operative delay to laparoscopic cholecystectomy: Racking up the cost of health care. *J Trauma Acute Care Surg* 2015;**79**:15–21.

- 193 Aguayo E, Sanaiha Y, Seo YJ, *et al.* Heparin-induced thrombocytopenia in cardiac surgery: Incidence, costs, and duration of stay. *Surgery* 2018;**164**:1377–81.
- 194 Canizares MF, Feldman L, Miller PE, *et al.* Complications and Cost of Syndactyly Reconstruction in the United States: Analysis of the Pediatric Health Information System. *Hand* 2017;**12**:327–34.
- 195 Sanaiha Y, Mantha A, Ziaeiian B, *et al.* Trends in Readmission and Costs After Transcatheter Implantation Versus Surgical Aortic Valve Replacement in Patients With Renal Dysfunction. *Am J Cardiol* 2019;**123**:1481–8.
- 196 Sanaiha Y, Kavianpour B, Downey P, *et al.* National Study of Index and Readmission Mortality and Costs for Thoracic Endovascular Aortic Repair in Patients With Renal Disease. *Ann Thorac Surg* 2020;**109**:458–64.
- 197 Labovitz JM, Kominski GF. Forecasting the value of podiatric medical care in newly insured diabetic patients during implementation of the affordable care act in California. *J Am Podiatr Med Assoc* 2016;**106**:163–71.
- 198 Johnson JT, Scholtens DM, Kuang A, *et al.* Does Value Vary by Center Surgical Volume for Neonates With Truncus Arteriosus? A Multicenter Study. *Ann Thorac Surg* Published Online First: 2021. doi:10.1016/j.athoracsur.2020.05.178
- 199 Saifi C, Cazzulino A, Park C, *et al.* National Trends for Primary and Revision Lumbar Disc Arthroplasty Throughout the United States. *Global Spine Journal* 2018;**8**:172–7.
- 200 Boucek DM, Lal AK, Eckhauser AW, *et al.* Resource Utilization for Initial Hospitalization in Pediatric Heart Transplantation in the United States. *Am J Cardiol* 2018;**121**:981–5.
- 201 Laratta JL, Reddy H, Lombardi JM, *et al.* Utilization of Interspinous Devices Throughout the United States Over a Recent Decade: An Analysis of the Nationwide Inpatient Sample. *Global Spine Journal* 2018;**8**:382–7.
- 202 Karnuta JM, Golubovsky JL, Haeberle HS, *et al.* Can a machine learning model accurately predict patient resource utilization following lumbar spinal fusion? *Spine J* 2020;**20**:329–36.
- 203 Karnuta JM, Navarro SM, Haeberle HS, *et al.* Bundled Care for Hip Fractures: A Machine-Learning Approach to an Untenable Patient-Specific Payment Model. *J Orthop Trauma* 2019;**33**:324–30.
- 204 Navarro SM, Ramkumar PN, Egger AC, *et al.* Evidence-Based Thresholds for the Volume-Value Relationship in Adolescent Idiopathic Scoliosis: Outcomes and Economies of Scale. *Spine Deformity* 2018;**6**:156–63.
- 205 Bateni SB, Gingrich AA, Hoch JS, *et al.* Defining Value for Pancreatic Surgery in Early-Stage Pancreatic Cancer. *JAMA Surg* 2019;**154**. doi:10.1001/jamasurg.2019.3019

- 206 Xiao R, Miller JA, Zafirau WJ, *et al.* Impact of Home Health Care on Health Care Resource Utilization Following Hospital Discharge: A Cohort Study. *Am J Med* 2018;**131**:395-407.e35.
- 207 Gandjian M, Williamson C, Sanaiha Y, *et al.* Continued Relevance of Minimum Volume Standards for Elective Esophagectomy: A National Perspective. *Ann Thorac Surg* Published Online First: 23 August 2021. doi:10.1016/j.athoracsur.2021.07.061
- 208 Hadaya J, Sanaiha Y, Hernandez R, *et al.* Impact of hospital volume on resource use after elective cardiac surgery: A contemporary analysis. *Surgery* 2021;**170**:682–8.
- 209 Seyidova N, Chen AD, del Valle D, *et al.* Nationwide cost variation for lower extremity flap reconstruction. *Eur J Plast Surg* 2021;**44**:475–82.
- 210 Sanaiha Y, Downey P, Lyons R, *et al.* Trends in utilization, mortality, and resource use after implantation of left ventricular assist devices in the United States. *J Thorac Cardiovasc Surg* 2021;**161**:2083-2091.e4.
- 211 Frankel WC, Navarro SM, Haeberle HS, *et al.* Optimizing the Volume–Value Relationship in Laminectomy. *Spine* 2019;**44**:659–69.
- 212 Miller PE, Guha A, Khera R, *et al.* National Trends in Healthcare-Associated Infections for Five Common Cardiovascular Conditions. *Am J Cardiol* 2019;**124**:1140–8.
- 213 Mukdad L, Mantha A, Aguayo E, *et al.* Readmission and resource utilization after orthotopic heart transplant versus ventricular assist device in the National Readmissions Database, 2010–2014. *Surgery* 2018;**164**:274–81.
- 214 Navarro SM, Wang EY, Haeberle HS, *et al.* Machine Learning and Primary Total Knee Arthroplasty: Patient Forecasting for a Patient-Specific Payment Model. *J Arthroplasty* 2018;**33**:3617–23.
- 215 Iloabuchi C, Dwibedi N, LeMasters T, *et al.* Low-value care and excess out-of-pocket expenditure among older adults with incident cancer – A machine learning approach. *Journal of Cancer Policy* 2021;**30**:100312.
- 216 Siu VJ, Varkey T, Khan UN, *et al.* Lend Me a Hand: A Value-Based Care Case Study on Pan Plexopathy of Unknown Origin. *Cureus* 2021;**13**.
